# Supplementary material for: Minor limonoid constituents from Swietenia macrophylla by simultaneous isolation using supercritical fluid chromatography and their biological activities
Source: Royal Society of Chemistry journal article supplement (doi:10.1039/d4ra03663h), 2024-01-01
Supplement: d4ra03663h1.pdf [file d4ra03663h1.pdf]

## Supporting Information

### **Minor limonoid constituents from *Swietenia macrophylla* by Simultaneous isolation using supercritical fluid chromatography and their biological activities**

**Kathiravan Asokan,<sup>1,2,3</sup> A. Zahir Hussain,<sup>2</sup> Rajesh Kumar Gattu,<sup>3</sup> Andivelu Ilangovan<sup>4\*</sup>**

<sup>1,3</sup>Aragen Life Sciences Pvt. Ltd. Bengaluru-562106, India.

<sup>2</sup>Department of Chemistry, Jamal Mohamed College, Tiruchirappalli, Tamilnadu-620020, India.

<sup>4</sup>School of Chemistry, Bharathidasan University, Tiruchirappalli, Tamilnadu-620024, India.

*Email: [ilangovanbdu@yahoo.com](mailto:ilangovanbdu@yahoo.com)*

#### **Table of Contents**

|                                                                                                                           |    |
|---------------------------------------------------------------------------------------------------------------------------|----|
| 1. Molecular structures compounds <b>1-12</b> .....                                                                       | 4  |
| 2. Experimental Procedure and Spectral data for compounds <b>1-12</b> .....                                               | 5  |
| <b>Figure S1.</b> SFC screening chromatogram of crude material of <i>Swietenia macrophylla</i> seed. ....                 | 12 |
| <b>Figure S2.</b> Optimized SFC method for Acetone and ethanol extract of <i>Swietenia macrophylla</i> seed .41           |    |
| <b>Figure S3.</b> <sup>1</sup> H NMR Spectrum of compound <b>1</b> at (400 MHz) in DMSO- <i>d</i> <sub>6</sub> .....      | 42 |
| <b>Figure S4.</b> <sup>13</sup> C NMR NMR Spectrum of compound <b>1</b> at (400 MHz) in DMSO- <i>d</i> <sub>6</sub> ..... | 43 |
| <b>Figure S5.</b> HSQC Spectrum of compound <b>1</b> at (400 MHz) in DMSO- <i>d</i> <sub>6</sub> .....                    | 44 |
| <b>Figure S6.</b> HMBC Spectrum of compound <b>1</b> at (400 MHz) in DMSO- <i>d</i> <sub>6</sub> .....                    | 45 |
| <b>Figure S7.</b> HRESI mass spectrum of compound <b>1</b> .....                                                          | 46 |
| <b>Figure S8.</b> IR spectrum of compound <b>1</b> .....                                                                  | 47 |
| <b>Figure S9.</b> Optical rotation of compound <b>1</b> .....                                                             | 48 |
| <b>Figure S10.</b> UV Spectra of compound <b>1</b> .....                                                                  | 49 |
| <b>Figure S11.</b> <sup>1</sup> H NMR Spectrum of compound <b>2</b> at (400 MHz) in DMSO- <i>d</i> <sub>6</sub> .....     | 50 |
| <b>Figure S12.</b> <sup>13</sup> C NMR Spectrum of compound <b>2</b> at (400 MHz) in DMSO- <i>d</i> <sub>6</sub> .....    | 51 |
| <b>Figure S13.</b> HSQC Spectrum of compound <b>2</b> in DMSO- <i>d</i> <sub>6</sub> .....                                | 52 |
| <b>Figure S14.</b> HMBC Spectrum of compound <b>2</b> in DMSO- <i>d</i> <sub>6</sub> .....                                | 53 |
| <b>Figure S15.</b> HRESI Mass spectrum of compound <b>2</b> .....                                                         | 54 |
| <b>Figure S16.</b> IR spectrum of compound <b>2</b> .....                                                                 | 55 |
| <b>Figure S17.</b> Optical rotation of compound <b>2</b> .....                                                            | 56 |
| <b>Figure S18.</b> UV spectra of compound <b>2</b> .....                                                                  | 57 |
| <b>Figure S19.</b> <sup>1</sup> H NMR Spectrum of compound <b>3</b> at (400 MHz) in DMSO- <i>d</i> <sub>6</sub> .....     | 58 |
| <b>Figure S20.</b> <sup>13</sup> C NMR Spectrum of compound <b>3</b> at (400 MHz) in DMSO- <i>d</i> <sub>6</sub> .....    | 59 |
| <b>Figure S21.</b> HSQC Spectrum of compound <b>3</b> in DMSO- <i>d</i> <sub>6</sub> .....                                | 60 |

|                                                                                                                         |    |
|-------------------------------------------------------------------------------------------------------------------------|----|
| <b>Figure S22.</b> HMBC Spectrum of compound <b>3</b> in DMSO- <i>d</i> <sub>6</sub> .....                              | 61 |
| <b>Figure S23.</b> N15 HSQC Spectrum of compound <b>3</b> in DMSO- <i>d</i> <sub>6</sub> .....                          | 62 |
| <b>Figure S24.</b> HRESI Mass spectrum of compound <b>3</b> .....                                                       | 63 |
| <b>Figure S25.</b> IR spectrum of compound <b>3</b> .....                                                               | 64 |
| <b>Figure S26.</b> Optical rotation of compound <b>3</b> .....                                                          | 65 |
| <b>Figure S27.</b> UV spectrum of compound <b>3</b> .....                                                               | 66 |
| <b>Figure S28.</b> <sup>1</sup> H NMR Spectrum of compound <b>4</b> at (400 MHz) in DMSO- <i>d</i> <sub>6</sub> .....   | 67 |
| <b>Figure S29.</b> <sup>13</sup> C NMR Spectrum of compound <b>4</b> at (400 MHz) in DMSO- <i>d</i> <sub>6</sub> .....  | 68 |
| <b>Figure S30.</b> HSQC Spectrum of compound <b>4</b> in DMSO- <i>d</i> <sub>6</sub> .....                              | 69 |
| <b>Figure S31.</b> HMBC Spectrum of compound <b>4</b> in DMSO- <i>d</i> <sub>6</sub> .....                              | 70 |
| <b>Figure S32.</b> HRESI Spectrum of compound <b>4</b> .....                                                            | 71 |
| <b>Figure S33.</b> <sup>1</sup> H NMR Spectrum of compound <b>5</b> at (400 MHz) in DMSO- <i>d</i> <sub>6</sub> .....   | 72 |
| <b>Figure S34.</b> <sup>13</sup> C NMR Spectrum of compound <b>5</b> at (400 MHz) in DMSO- <i>d</i> <sub>6</sub> .....  | 73 |
| <b>Figure S35.</b> HSQC Spectrum of compound <b>5</b> in DMSO- <i>d</i> <sub>6</sub> .....                              | 74 |
| <b>Figure S36.</b> HMBC Spectrum of compound <b>5</b> in DMSO- <i>d</i> <sub>6</sub> .....                              | 75 |
| <b>Figure S37.</b> HRESI Mass Spectrum of compound <b>5</b> .....                                                       | 76 |
| <b>Figure S38.</b> <sup>1</sup> H NMR Spectrum of compound <b>6</b> at (400 MHz) in DMSO- <i>d</i> <sub>6</sub> .....   | 77 |
| <b>Figure S39.</b> <sup>13</sup> C NMR Spectrum of compound <b>6</b> at (400 MHz) in DMSO- <i>d</i> <sub>6</sub> .....  | 78 |
| <b>Figure S40.</b> HSQC Spectrum of compound <b>6</b> in DMSO- <i>d</i> <sub>6</sub> .....                              | 79 |
| <b>Figure S41.</b> HMBC Spectrum of compound <b>6</b> in DMSO- <i>d</i> <sub>6</sub> .....                              | 80 |
| <b>Figure S42.</b> LCESI Mass Spectrum of compound <b>6</b> .....                                                       | 81 |
| <b>Figure S43.</b> <sup>1</sup> H NMR Spectrum of compound <b>7</b> at (400 MHz) in DMSO- <i>d</i> <sub>6</sub> .....   | 82 |
| <b>Figure S44.</b> <sup>13</sup> C NMR Spectrum of compound <b>7</b> at (400 MHz) in DMSO- <i>d</i> <sub>6</sub> .....  | 83 |
| <b>Figure S45.</b> HSQC Spectrum of compound <b>7</b> in DMSO- <i>d</i> <sub>6</sub> .....                              | 84 |
| <b>Figure S46.</b> HMBC Spectrum of compound <b>7</b> in DMSO- <i>d</i> <sub>6</sub> .....                              | 85 |
| <b>Figure S47.</b> HRMS-ESI Mass Spectrum of compound <b>7</b> .....                                                    | 86 |
| <b>Figure S48.</b> <sup>1</sup> H NMR Spectrum of compound <b>8</b> at (400 MHz) in DMSO- <i>d</i> <sub>6</sub> .....   | 87 |
| <b>Figure S49.</b> ESI LCMS spectrum of compound <b>8</b> .....                                                         | 88 |
| <b>Figure S50.</b> <sup>1</sup> H NMR Spectrum of compound <b>9</b> at (400 MHz) in DMSO- <i>d</i> <sub>6</sub> .....   | 89 |
| <b>Figure S51.</b> <sup>13</sup> C NMR Spectrum of compound <b>9</b> at (400 MHz) in DMSO- <i>d</i> <sub>6</sub> .....  | 90 |
| <b>Figure S52.</b> HSQC Spectrum of compound <b>9</b> in DMSO- <i>d</i> <sub>6</sub> .....                              | 91 |
| <b>Figure S53.</b> HMBC Spectrum of compound <b>9</b> in DMSO- <i>d</i> <sub>6</sub> .....                              | 92 |
| <b>Figure S54.</b> LC-ESI Mass Spectrum of compound <b>9</b> .....                                                      | 93 |
| <b>Figure S55.</b> <sup>1</sup> H NMR Spectrum of compound <b>10</b> at (400 MHz) in DMSO- <i>d</i> <sub>6</sub> .....  | 94 |
| <b>Figure S56.</b> <sup>13</sup> C NMR Spectrum of compound <b>10</b> at (400 MHz) in DMSO- <i>d</i> <sub>6</sub> ..... | 95 |
| <b>Figure S57.</b> HSQC Spectrum of compound <b>10</b> in DMSO- <i>d</i> <sub>6</sub> .....                             | 96 |

|                                                                                                      |     |
|------------------------------------------------------------------------------------------------------|-----|
| <b>Figure S58.</b> HMBC Spectrum of compound <b>10</b> in DMSO- d6.....                              | 97  |
| <b>Figure S59.</b> ESI LCMS Spectrum of compound <b>10</b> .....                                     | 98  |
| <b>Figure S60.</b> <sup>1</sup> H NMR Spectrum of compound <b>11</b> at (400 MHz) in DMSO- d6.....   | 99  |
| <b>Figure S61.</b> <sup>13</sup> C NMR Spectrum of compound <b>11</b> at (400 MHz) in DMSO- d6 ..... | 100 |
| <b>Figure S62.</b> HSQC Spectrum of compound <b>11</b> in DMSO- d6.....                              | 101 |
| <b>Figure S63.</b> HMBC Spectrum of compound <b>11</b> in DMSO- d6.....                              | 102 |
| <b>Figure S64.</b> HRESI Spectrum of compound <b>11</b> .....                                        | 103 |
| <b>Figure S65.</b> <sup>1</sup> H NMR Spectrum of compound <b>12</b> at (400 MHz) in DMSO- d6.....   | 104 |
| <b>Figure S66.</b> HSQC Spectrum of compound <b>12</b> in DMSO- d6.....                              | 105 |
| <b>Figure S67.</b> HSRMS Spectrum of compound <b>12</b> .....                                        | 106 |
| <b>Pharmacological activities</b> .....                                                              | 107 |
| Figure S62. Antibacterial activity .....                                                             | 109 |
| <b>Figure 68. Antifungal activity</b> .....                                                          | 115 |
| <b>Figure 69. Anti-mutagenic activity</b> .....                                                      | 115 |
| <b>References</b> .....                                                                              | 117 |

## 1. Molecular structures compounds 1-12

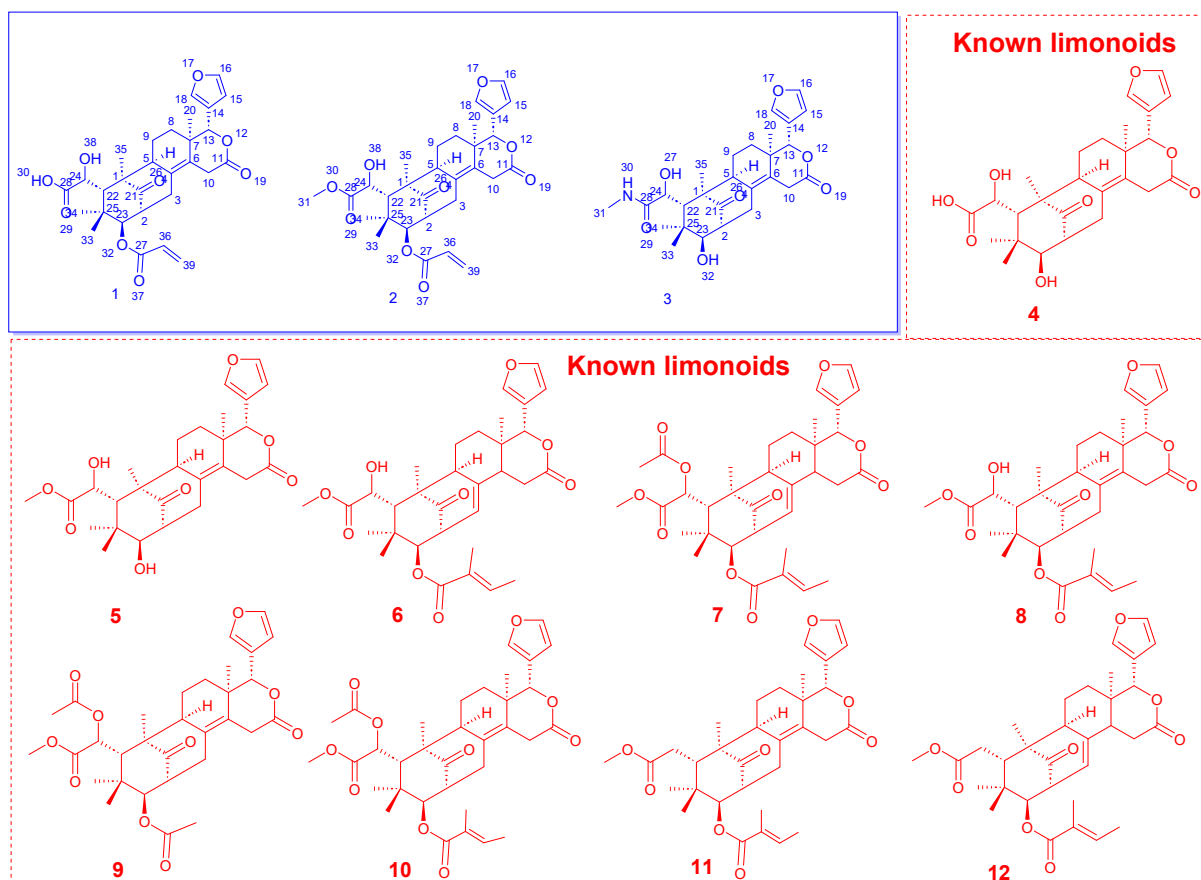

**Figure 1.** Molecular structure of three new limonoids and nine known limonoids isolated from acetone and ethanol extracts of the seeds of *Swietenia macrophylla*.



## 2. Experimental Procedure and Spectral data for compounds 1-12

All the reagents were purchased commercially and used without further purification. <sup>1</sup>H NMR and <sup>13</sup>C NMR were recorded with Bruker 400 MHz. <sup>1</sup>H NMR (400MHz) and <sup>13</sup>C NMR (100MHz) spectra were recorded in CDCl<sub>3</sub> with tetramethylsilane as the internal standard. All the NMR spectra were acquired at ambient temperature. Analytical thin layer chromatography (TLC) was performed using Silica Gel 60 Å F<sub>254</sub> pre-coated plates (0.25 mm thickness). High resolution mass spectra (HRMS) were recorded on Bruker Compass Data Analysis 4.1, HRMS-ESI Mass Spectrometer with Orbitrap Exploris-240 Analyzer, Source Type ESI, in positive mode.

### **Materials and Methods:**

#### **Chemicals and reagents:**

The HPLC grade chemicals utilized in the study such as methanol (MeOH), acetonitrile (ACN), Trifluoroacetic acid (TFA), diethylamine (DEA) and 7N Methanolic ammonia, isopropyl alcohol (IPA) were purchased from Sigma-Aldrich Co. (Merck-INDIA).

#### **Instrumentation:**

Analytical Acquity UPC2 PDA (Waters) with a six-position modifier and column switching valves, Thar's automated SFC method development stations with a six-position modifier and a ten-position column switching valves, and Waters SFC150Mgm prep were all purchased from Waters (WATERS GES MBH, W-Austria). Waters ACQUITY H-Class UPLC equipment coupled with Waters SQ Detector-2 was used for the purity analysis and mass identification of compounds. Achiral and chiral Columns were purchased from Daicel, Waters, YMC, Phenomenex and Regis Technologies.

#### **Collection of plant material and preparation of crude extract from seed powder:**

*Swietenia macrophylla* fruits were collected from the Salem is located at latitude 11.65376 and longitude 78.15538. It is part of Asia and the northern hemisphere, Tamilnadu, India, and their seeds were removed by peeling them. After being processed using an electronic grinder for a week to a coarse powder, the seeds were weighed, shade-dried, and stored in a dry place. 500 g of dry powder were continuously Soxhlet-extracted using hexane residue, followed by chloroform, acetone, ethanol, methanol, and water three times each at 40–50 °C. A rotary evaporator was utilized to eliminate the solvents from every extract. The extracts were then kept at –70°C for 48 hours, and a freeze-dryer (Labconco Corporation,

Denmark) was used to freeze-dry them under a vacuum for 24 hours at  $-40^{\circ}\text{C}$ . Strictly sealed glass bottles containing each dried extract were kept at  $4^{\circ}\text{C}$ .

| Method of extraction | Solvent Extracts (gram) | Solvent used | Extracts | Yield (%) |
|----------------------|-------------------------|--------------|----------|-----------|
| Cold extraction      | 500 g                   | Hexane       | 43 g     | 8.6       |
|                      |                         | Chloroform   | 31g      | 6.2       |
|                      |                         | Acetone      | 63 g     | 12.6      |
|                      |                         | Ethanol      | 68 g     | 13.6      |
|                      |                         | Methanol     | 43 g     | 8.6       |
|                      |                         | Water        | 28 g     | 5.6       |

### Spectral data for Compounds 1-12

#### 2-((4R,4aR,7R,10R)-10-(acryloyloxy)-4-(furan-3-yl)-4a,7,9,9-tetramethyl-2,13-dioxo-1,4,4a, 5, 6, 6a, 7, 8,9,10,11,12b-dodecahydro-2H-7,11-methanocycloocta[f]isochromen-8-yl)-2-hydroxyacetic acid (1)

Compound **1** is an amorphous white solid with a melting point of  $178-180^{\circ}\text{C}$ . Its molecular formula is  $\text{C}_{29}\text{H}_{34}\text{O}_9$  as determined by positive HR-ESI-MS ( $m/z$  527.1511). The IR spectrum (KBr) shows absorption bands at  $3501\text{ cm}^{-1}$  (OH) and  $1718\text{ cm}^{-1}$  (C=O). The optical rotation  $[\alpha]_{\text{D}}^{25} -180.8$ .

The structure of Compound **1** was supported by  $^1\text{H}$ ,  $^{13}\text{C}$ , HSQC, and HMBC NMR data. Key structural features include:

- A substituted end alkene ( $\delta_{\text{H}}$  5.87 (dd,  $J = 10.2, 1.8\text{ Hz}$ ), 6.27 (dd,  $J = 17.2, 1.8\text{ Hz}$ ), 6.07 (dd,  $J = 17.2, 10.2\text{ Hz}$ )) located at C-27.
- A furan ring ( $\delta_{\text{H}}$  6.49 (s), 7.64 (s), 7.67 (s)) located at C-13, with an oxymethine group.
- Tertiary methyl groups ( $\delta_{\text{H}}$  0.89 (s), 1.22 (s)).
- Oxygen-attached methine groups ( $\delta_{\text{H}}$  3.35 (d,  $J = 9.4\text{ Hz}$ ), 4.40 (s), 5.47 (s)).

Carbon resonances include methyls, methylenes, methines, aliphatic and aromatic quaternary carbons, as well as carbonyl groups. Specific assignments were made using HMBC correlations, such as:

- C-13 (furan ring) correlated with H-15, H-18, H-20.
- C-23 correlated with H-3, H-22, H-33, H-34.
- C-24 correlated with H-22.
- C-4 and C-6 (aromatic quaternary carbons) correlated with H-10, H-13, H-20.
- C-11 (ester carbonyl carbon) correlated with H-13, H-20.
- C-28 (acid carbonyl carbon) correlated with H-22, H-24.
- C-21 (most deshielded keto carbon) correlated with H-3, H-23, H-35.

**(4R,4aR,7R,10R)-4-(furan-3-yl)-8-(1-hydroxy-2-methoxy-2-oxoethyl)-4a,7,9,9-tetramethyl-2,13-dioxo-1,4,4a,5,6,6a,7,8,9,10,11,12b-dodecahydro-2H-7,11-methanocycloocta[f]isochromen-10-yl acrylate (2)**

Compound **2** is an amorphous white solid with a melting point of 188-190°C. Its molecular formula, C<sub>30</sub>H<sub>36</sub>O<sub>9</sub>, was determined by HR-ESI-MS (m/z 541.2446). The IR spectrum (KBr) shows absorption bands at 3483 cm<sup>-1</sup> (OH), 1733 cm<sup>-1</sup> (C=O), and 1251 cm<sup>-1</sup> (CO-OCH<sub>3</sub>). The optical rotation [α]<sub>D</sub><sup>25</sup> -119.40.

The <sup>1</sup>H NMR spectrum of Compound **2** indicated the presence of:

- A substituted end alkene at δ<sub>H</sub> 5.87 (dd, *J* = 10.2, 1.8 Hz, 1H), 6.27 (dd, *J* = 17.2, 1.8 Hz, 1H), 6.07 (dd, *J* = 17.2, 10.2 Hz, 1H).
- A furan ring at δ<sub>H</sub> 6.49 (s, 1H), 7.64 (s, 1H), 7.67 (s, 1H).
- Two tertiary methyl groups at δ<sub>H</sub> 0.89 (s, 3H), 1.22 (s, 3H).
- One gem-dimethyl group at δ<sub>H</sub> 0.77 (s, 3H), 0.84 (s, 3H).
- Three oxygen-attached methine groups at δ<sub>H</sub> 3.35 (d, *J* = 9.4 Hz, 1H), 4.40 (s, 1H), 5.47 (s, 1H).

The <sup>13</sup>C NMR data showed 30 carbon signals, resolved into five methyls, five methylenes, ten methines, three aliphatic quaternary carbons, three aromatic quaternary carbons, three ester carbonyl groups, and one keto carbonyl carbon, as supported by HSQC and HMBC data. Key structural assignments include:

- The substituted end alkene at δ<sub>H</sub> 5.87, 6.27, 6.07, located at C-27 through HMBC correlations.
- The furan ring protons at δ<sub>H</sub> 6.49, 7.64, 7.67, located at C-13 by HMBC correlations.
- A methoxy group at C-31 assigned based on cross-peaks from H-31 to C-28.

- Oxymethine groups at C-13 assigned by HMBC correlations from H-15, H-18, H-20 to C-13.
- C-23 assigned by HMBC correlations from H-3, H-22, H-33, H-34.
- C-24 assigned by HMBC correlations from H-22.
- Aromatic quaternary carbons C-4 and C-6 assigned by HMBC cross-peaks of H-10, H-13, H-20.
- An ester carbonyl carbon at C-11 assigned by HMBC correlations from H-13, H-10.
- The most deshielded keto carbon at C-21 confirmed by HMBC cross-peaks of H-3, H-23, H-35

**2-((4R,4aR,10R)-4-(furan-3-yl)-10-hydroxy-4a,7,9,9-tetramethyl-2,13-dioxo-1,4,4a,5,6,6a,7,8,9,10,11,12-dodecahydro-2H-7,11-methanocycloocta[f]isochromen-8-yl)-2-hydroxy-N-methylacetamide (3)**

Compound **3** is an amorphous white solid with a melting point of 195-197°C. Its molecular formula, C<sub>27</sub>H<sub>35</sub>NO<sub>7</sub>, was determined by HR-ESI-MS (m/z 486.2492). The IR spectrum (KBr) shows absorption bands at 3426 cm<sup>-1</sup> (OH) and 1649 cm<sup>-1</sup> (C=O-NH). The optical rotation [α]<sup>25</sup><sub>D</sub> -125.8.

The <sup>1</sup>H NMR spectrum indicated:

- A secondary amide functional group at δ<sub>H</sub> 7.81 (q, 1H, NH), 2.56 (d, 3H).
- A furan ring at δ<sub>H</sub> 6.50 (s, 1H), 7.66 (s, 1H), 7.68 (s, 1H).
- Two tertiary methyl groups at δ<sub>H</sub> 0.90 (s, 3H), 1.22 (s, 3H).
- One gem-dimethyl group at δ<sub>H</sub> 0.78 (s, 3H), 0.85 (s, 3H).
- Three oxygen-attached methine groups at δ<sub>H</sub> 3.36 (d, *J* = 9.4 Hz, 1H), 4.41 (s, 1H), 5.48 (s, 1H).
- Two secondary alcohol groups at δ<sub>H</sub> 5.17 (d, *J* = 4.8 Hz, 1H), 5.28 (d, *J* = 4.5 Hz, 1H).

The <sup>13</sup>C NMR data revealed 27 carbon signals, resolved into five methyls, four methylenes, nine methines, three aliphatic quaternary carbons, three aromatic quaternary carbons, an acid carbonyl group, an ester carbonyl group, and a keto carbonyl carbon, supported by HSQC and HMBC data. Key structural assignments include:

- The secondary amide functional group located at C-28 through HMBC correlations.
- The furan ring protons at  $\delta_{\text{H}}$  6.50, 7.66, 7.68, located at C-13 by HMBC correlations.
- Oxymethine group at C-13 assigned by HMBC correlations from H-15, H-18, H-20.
- C-23 assigned by HMBC correlations from H-3, H-22, H-33, H-34.
- C-24 assigned by HMBC correlations from H-22.
- Aromatic quaternary carbons C-4 and C-6 assigned by HMBC cross-peaks of H-10, H-13, H-20.
- Ester carbonyl carbon at C-11 assigned by HMBC correlations from H-10, H-13.
- The most deshielded keto carbon at C-21 confirmed by HMBC cross-peaks of H-3, H-23, H-35

**2-((4R,4aR,10R)-4-(furan-3-yl)-10-hydroxy-4a,7,9,9-tetramethyl-2,13-dioxo-1,4,4a,5,6,6a,7,8,9,10,11,12-dodecahydro-2H-7,11-methanocycloocta[f]isochromen-8-yl)-2-hydroxyacetic acid (4)**

$^1\text{H-NMR}$  (400MHz, DMSO)  $\delta$  7.67 (q,  $J = 3.5\text{Hz}$ , 2H), 6.50 (d,  $J = 1.1\text{Hz}$ , 1H), 5.48 (s, 1H), 4.40 (s, 1H), 3.90 (d,  $J = 20.9\text{Hz}$ , 1H), 3.39 (q,  $J = 11.3\text{Hz}$ , 2H), 3.08 (m,  $J = 6.4\text{Hz}$ , 2H), 2.80 (m,  $J = 2.8\text{Hz}$ , 1H), 1.84 (q,  $J = 14.5\text{Hz}$ , 3H), 1.68 (t,  $J = 8.5\text{Hz}$ , 2H), 1.23 (s, 3H), 0.90 (m, 4H), 0.85 (s, 3H), 0.78 (s, 3H).<sup>1,12</sup>

**Methyl 2-((4R,4aR,7R,10R)-4-(furan-3-yl)-10-hydroxy-4a,7,9,9-tetramethyl-2,13-dioxo-1,4,4a,5,6,6a,7,8,9,10,11,12-dodecahydro-2H-7,11-methanocycloocta[f]isochromen-8-yl)-2-hydroxyacetate (5)**

$^1\text{H-NMR}$  (DMSO) 0.78 (3H, s), 0.85 (3H, s), 0.90 (3H, s), 0.94 (1H, t,  $J = 4.40\text{ Hz}$ ), 1.23 (3H, s), 1.68 (2H, t,  $J = 9.05\text{ Hz}$ ), 1.78 (2H, m,  $J = 4.98\text{ Hz}$ ), 1.89 (1H, s), 2.79 (1H, q,  $J = 3.14\text{ Hz}$ ), 3.07 (1H, q,  $J = 5.46\text{ Hz}$ ), 3.11 (1H, s), 3.37 (2H, t,  $J = 4.80\text{ Hz}$ ), 3.66 (3H, s), 3.91 (1H, d,  $J = 20.93\text{ Hz}$ ), 4.41 (1H, d,  $J = 4.72\text{ Hz}$ ), 5.17 (1H, d,  $J = 4.84\text{ Hz}$ ), 5.28 (1H, d,  $J = 4.20\text{ Hz}$ ), 5.48 (1H, s), 6.51 (1H, d,  $J = 1.16\text{ Hz}$ ), 7.68 (2H, q,  $J = 3.56\text{ Hz}$ ).<sup>2-3</sup>

**Methyl 2-((4R,4aR,7R,10R)-4-(furan-3-yl)-10-hydroxy-4a,7,9,9-tetramethyl-2,13-dioxo-1,4,4a,5,6,6a,7,8,9,10,11,12-dodecahydro-2H-7,11-methanocycloocta[f]isochromen-8-yl)-2-hydroxyacetate (6)**

$^1\text{H-NMR}$  (DMSO) 0.84 (3H, s), 0.91 (3H, s), 1.01 (3H, s), 1.30 (3H, s), 1.49 (2H, m,  $J = 7.42\text{ Hz}$ ), 1.64 (3H, d,  $J = 7.03\text{ Hz}$ ), 1.70 (4H, s), 2.01 (1H, q,  $J = 5.96\text{ Hz}$ ), 2.23 (1H, q,  $J = 5.57\text{ Hz}$ ), 2.32 (1H, d,  $J = 5.33\text{ Hz}$ ), 2.65 (1H, d,  $J = 18.75\text{ Hz}$ ), 2.85 (1H, q,  $J = 8.39\text{ Hz}$ ),

3.28 (1H, d,  $J = 8.36$  Hz), 3.41 (1H, s), 3.61 (3H, s), 4.49 (1H, d,  $J = 4.90$  Hz), 4.53 (1H, d,  $J = 9.42$  Hz), 5.17 (1H, d,  $J = 7.23$  Hz), 5.45 (1H, s), 5.57 (1H, d,  $J = 4.67$  Hz), 6.52 (1H, d,  $J = 1.16$  Hz), 6.79 (1H, m,  $J = 3.97$  Hz), 7.71 (1H, t,  $J = 1.60$  Hz), 7.77 (1H, s). <sup>4-5</sup>

**(4R,4aR,7R,10R)-8-(1-acetoxy-2-methoxy-2-oxoethyl)-4-(furan-3-yl)-4a,7,9,9-tetramethyl-2,13-dioxo-1,4,4a,5,6,6a,7,8,9,10,11,12b-dodecahydro-2H-7,11-methanocycloocta[f]isochromen-10-yl (E)-2-methylbut-2-enoate (7)**

<sup>1</sup>H-NMR (DMSO) 0.87 (3H, s), 0.91 (3H, s), 1.04 (3H, s), 1.08 (3H, s), 1.67 (9H, t,  $J = 14.02$  Hz), 2.02 (1H, s), 2.18 (3H, s), 2.32 (2H, m,  $J = 7.16$  Hz), 2.66 (1H, d,  $J = 18.66$  Hz), 2.86 (1H, q,  $J = 8.37$  Hz), 3.37 (1H, d,  $J = 8.14$  Hz), 3.61 (4H, d,  $J = 22.39$  Hz), 4.64 (1H, d,  $J = 9.42$  Hz), 5.20 (1H, d,  $J = 7.22$  Hz), 5.43 (1H, s), 5.50 (1H, s), 6.55 (1H, s), 6.78 (1H, d,  $J = 7.06$  Hz), 7.71 (1H, s), 7.77 (1H, s). <sup>5-7</sup>

**(4R,4aR,7R,10R)-4-(furan-3-yl)-8-(1-hydroxy-2-methoxy-2-oxoethyl)-4a,7,9,9-tetramethyl-2,13-dioxo-1,4,4a,5,6,6a,7,8,9,10,11,12-dodecahydro-2H-7,11-methanocycloocta[f]isochromen-10-yl (E)-2-methylbut-2-enoate (8)**

<sup>1</sup>H-NMR (DMSO) 0.79 (3H, s), 0.90 (3H, s), 0.98 (3H, s), 1.05 (1H, t,  $J = 8.89$  Hz), 1.28 (3H, s), 1.70 (5H, q,  $J = 11.14$  Hz), 1.78 (3H, s), 1.83 (1H, d,  $J = 10.34$  Hz), 2.02 (2H, t,  $J = 7.28$  Hz), 2.60 (1H, d,  $J = 14.71$  Hz), 2.99 (1H, q,  $J = 4.52$  Hz), 3.25 (1H, s), 3.35 (2H, s), 3.69 (1H, s), 4.47 (3H, d,  $J = 4.53$  Hz), 4.60 (1H, d,  $J = 9.66$  Hz), 5.40 (1H, s), 5.51 (1H, d,  $J = 4.48$  Hz), 6.52 (1H, s), 6.84 (1H, d,  $J = 7.07$  Hz), 7.71 (2H, s). <sup>4, 5, 8</sup>

**Methyl 2-acetoxy-2-((4R,4aR,7R,10R)-10-acetoxy-4-(furan-3-yl)-4a,7,9,9-tetramethyl-2,13-dioxo-1,4,4a,5,6,6a,7,8,9,10,11,12-dodecahydro-2H-7,11-methanocycloocta[f]isochromen-8-yl) acetate (9)**

<sup>1</sup>H-NMR (DMSO) 0.77 (3H, s), 0.95 (3H, s), 0.99 (3H, s), 1.05 (3H, s), 1.12 (1H, d,  $J = 9.03$  Hz), 1.73 (3H, q,  $J = 10.37$  Hz), 2.10 (5H, s), 2.16 (3H, s), 2.97 (2H, m,  $J = 8.36$  Hz), 3.30 (1H, s), 3.51 (1H, d,  $J = 20.28$  Hz), 3.73 (4H, s), 4.81 (1H, d,  $J = 9.89$  Hz), 5.38 (1H, s), 5.51 (1H, s), 6.53 (1H, d,  $J = 1.08$  Hz), 7.71 (1H, t,  $J = 1.64$  Hz), 7.75 (1H, s). <sup>5, 9</sup>

**(4R,4aR,7R,10R)-8-(1-acetoxy-2-methoxy-2-oxoethyl)-4-(furan-3-yl)-4a,7,9,9-tetramethyl-2,13-dioxo-1,4,4a,5,6,6a,7,8,9,10,11,12-dodecahydro-2H-7,11-methanocycloocta[f]isochromen-10-yl (E)-2-methylbut-2-enoate (10)**

<sup>1</sup>H-NMR (DMSO) 0.83 (3H, s), 0.92 (3H, s), 1.01 (3H, s), 1.07 (3H, s), 1.12 (1H, q, *J* = 5.09 Hz), 1.75 (8H, q, *J* = 9.10 Hz), 2.05 (2H, d, *J* = 16.28 Hz), 2.17 (3H, s), 2.66 (1H, q, *J* = 2.35 Hz), 3.06 (1H, t, *J* = 4.00 Hz), 3.36 (2H, s), 3.45 (3H, s), 3.73 (1H, s), 4.71 (1H, d, *J* = 9.74 Hz), 5.36 (1H, s), 5.41 (1H, s), 6.54 (1H, s), 6.83 (1H, q, *J* = 6.75 Hz), 7.72 (1H, d, *J* = 1.52 Hz), 7.77 (1H, s). <sup>5, 8, 10</sup>

**(4R,4aR,7R,10R)-4-(furan-3-yl)-8-(2-methoxy-2-oxoethyl)-4a,7,9,9-tetramethyl-2,13-dioxo-1,4,4a,5,6,6a,7,8,9,10,11,12-dodecahydro-2H-7,11-methanocycloocta[f]isochromen-10-yl (E)-2-methylbut-2-enoate (11)**

<sup>1</sup>H-NMR (400 MHz, DMSO) δ 0.68 (s, 3H), 0.74 (s, 3H), 0.85 (q, *J* = 3.5 Hz, 2H), 0.94 (s, 3H), 0.99 (m, *J* = 4.0 Hz, 1H), 1.07 (s, 3H), 1.47 (m, 1H), 1.64 (d, *J* = 10.0 Hz, 1H), 1.74 (d, *J* = 7.0 Hz, 3H), 1.81 (s, 1H), 1.99 (m, *J* = 9.7 Hz, 1H), 2.18 (m, *J* = 3.6 Hz, 2H), 2.39 (t, *J* = 8.7 Hz, 1H), 2.61 (t, *J* = 8.2 Hz, 2H), 3.03 (q, *J* = 4.6 Hz, 1H), 3.24 (d, *J* = 10.4 Hz, 1H), 3.39 (d, *J* = 15.4 Hz, 2H), 3.66 (s, 3H), 4.76 (d, *J* = 9.6 Hz, 1H), 5.45 (s, 1H), 6.52 (d, *J* = 1.2 Hz, 1H), 6.86 (q, *J* = 2.9 Hz, 1H), 7.67 (s, 1H), 7.71 (t, *J* = 1.6 Hz, 1H). <sup>5, 7, 11</sup>

**(4R,4aR,7R,10R)-4-(furan-3-yl)-8-(2-methoxy-2-oxoethyl)-4a,7,9,9-tetramethyl-2,13-dioxo-1,4,4a,5,6,6a,7,8,9,10,11,12b-dodecahydro-2H-7,11-methanocycloocta[f]isochromen-10-yl (E)-2-methylbut-2-enoate (12)**

<sup>1</sup>H-NMR (400 MHz, DMSO) δ 7.84 (s, 1H), 7.71 (t, *J* = 1.6 Hz, 1H), 6.82 (m, *J* = 4.0 Hz, 1H), 6.55 (d, *J* = 1.2 Hz, 1H), 5.51 (s, 1H), 5.19 (d, *J* = 7.1 Hz, 1H), 4.74 (d, *J* = 9.4 Hz, 1H), 3.65 (s, 3H), 3.35 (s, 1H), 3.32 (s, 1H), 2.86 (t, *J* = 9.9 Hz, 1H), 2.66 (d, *J* = 18.8 Hz, 1H), 2.55 (d, *J* = 7.9 Hz, 1H), 2.40 (q, *J* = 9.3 Hz, 1H), 2.33 (q, *J* = 1.9 Hz, 1H), 2.17 (d, *J* = 4.7 Hz, 1H), 1.89 (m, *J* = 5.4 Hz, 1H), 1.72 (s, 4H), 1.65 (q, *J* = 2.7 Hz, 3H), 1.44 (m, *J* = 5.7 Hz, 2H), 1.06 (s, 3H), 0.99 (s, 3H), 0.77 (s, 3H), 0.70 (s, 3H). <sup>5,7-8</sup>.

**Figure S1.** SFC screening chromatogram of crude material of *Swietenia macrophylla* seed. Screening-1 various columns with Isopropyl alcohol as a Co-solvent

Column: Daicel-P4VP

Single Absorbance (220nm) Plot

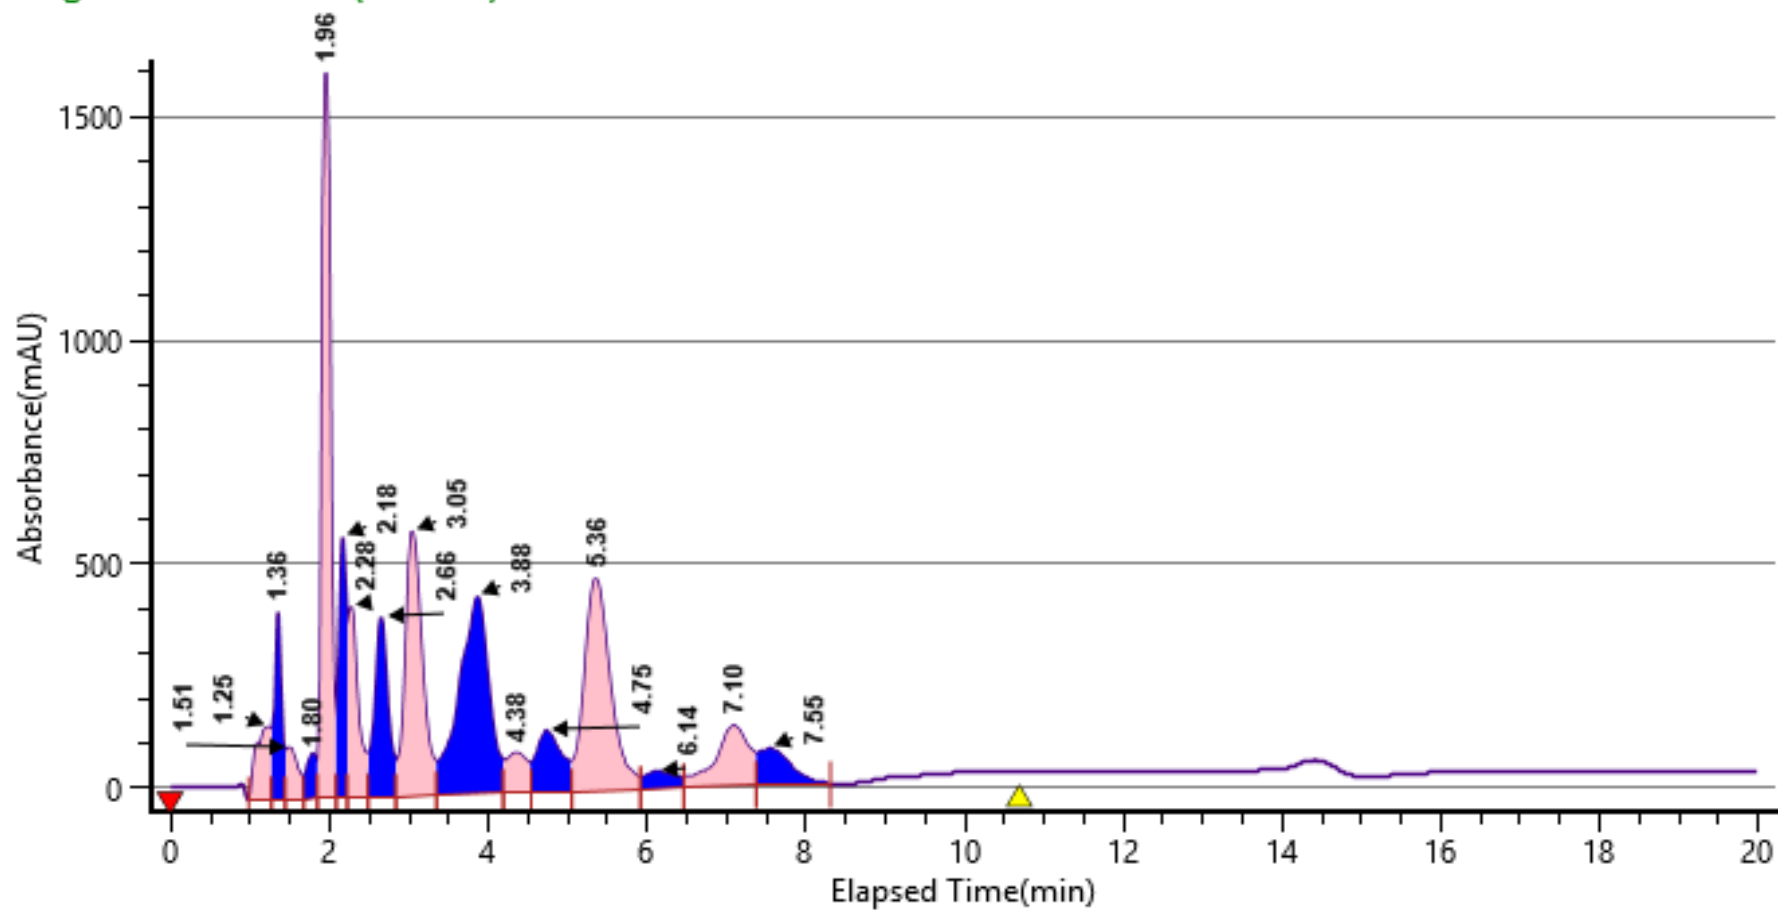



Column: LUX-i-amylose-3

### Single Absorbance (220nm) Plot

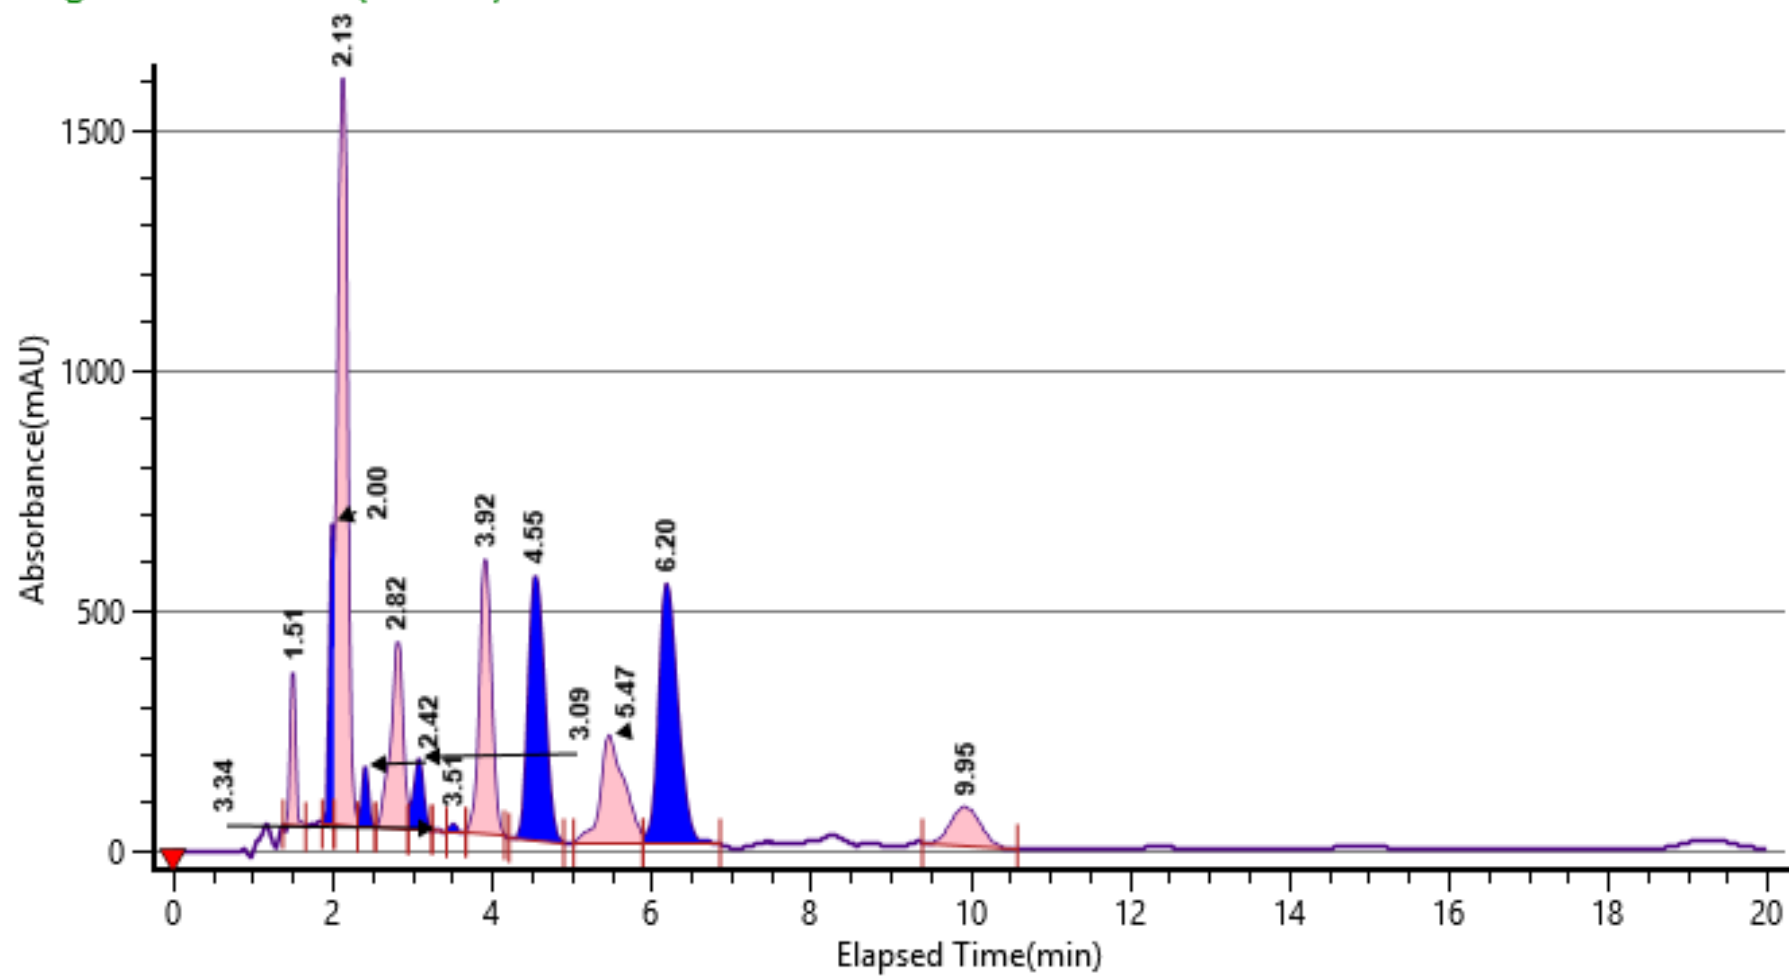

**Column: Chiralpak-AD-H**

### Single Absorbance (220nm) Plot

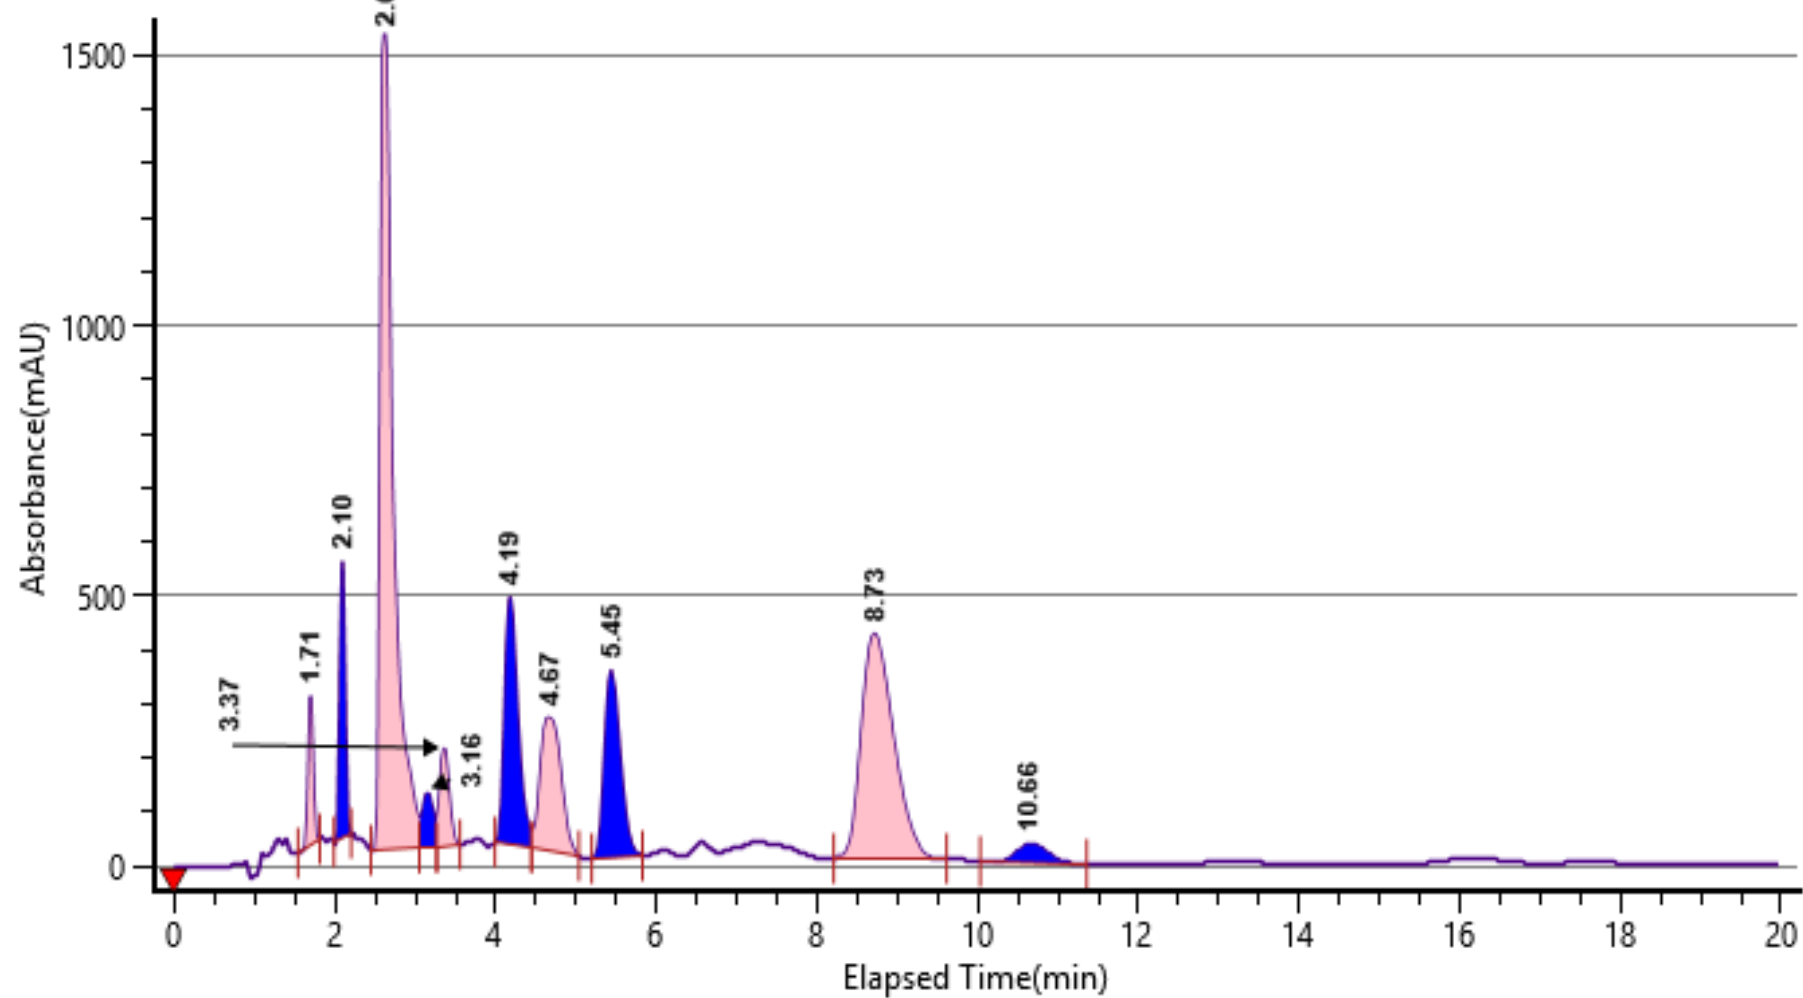

Column : LUX-Amylose-2

Single Absorbance (220nm) Plot

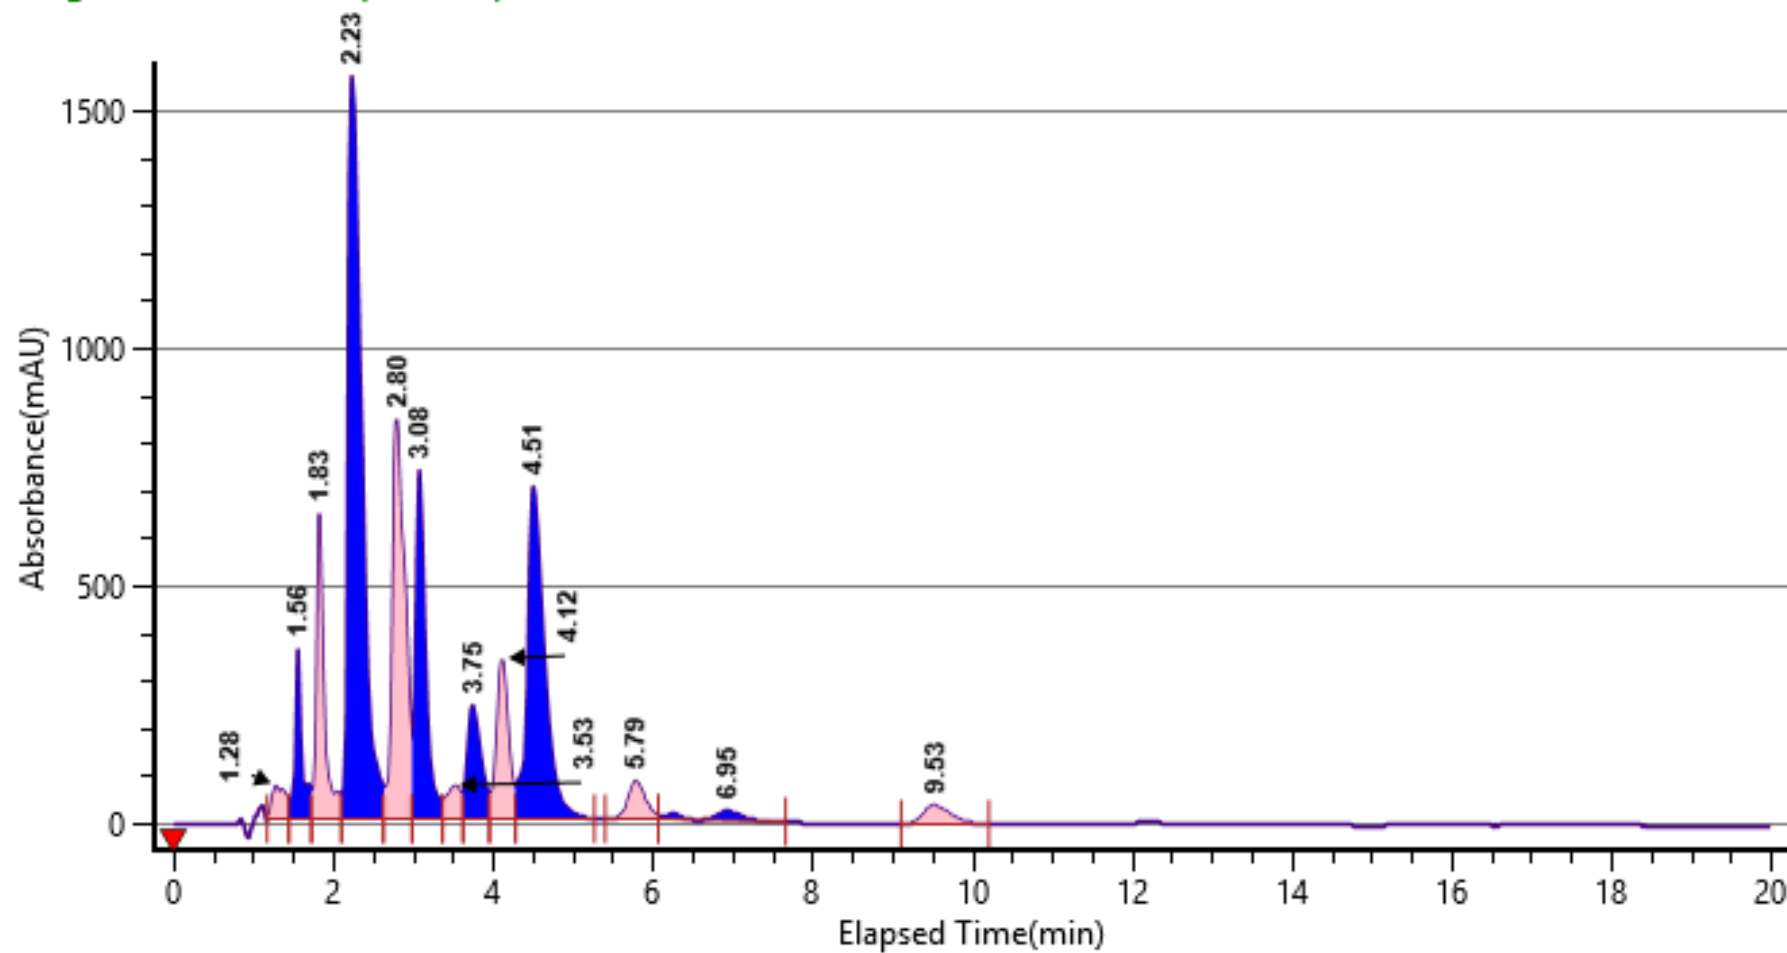

**Column : Chiralpak-IG**

### Single Absorbance (220nm) Plot

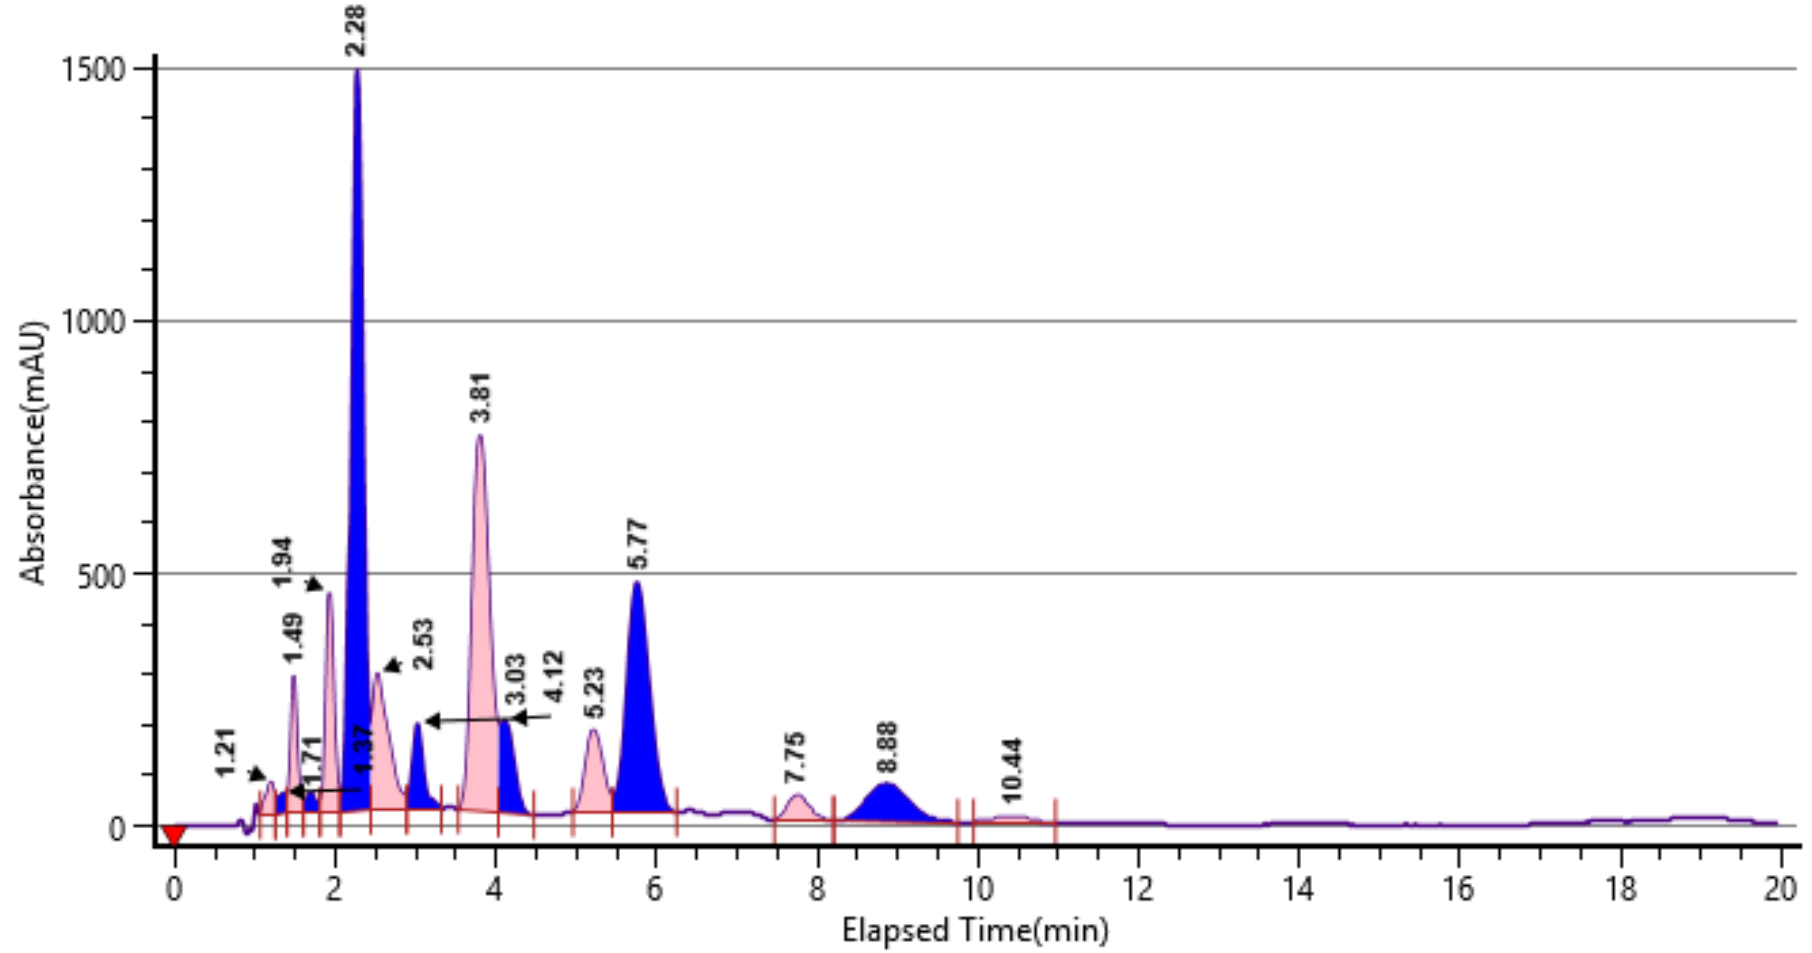

Column: Chiralpak-AS-H

### Single Absorbance (220nm) Plot

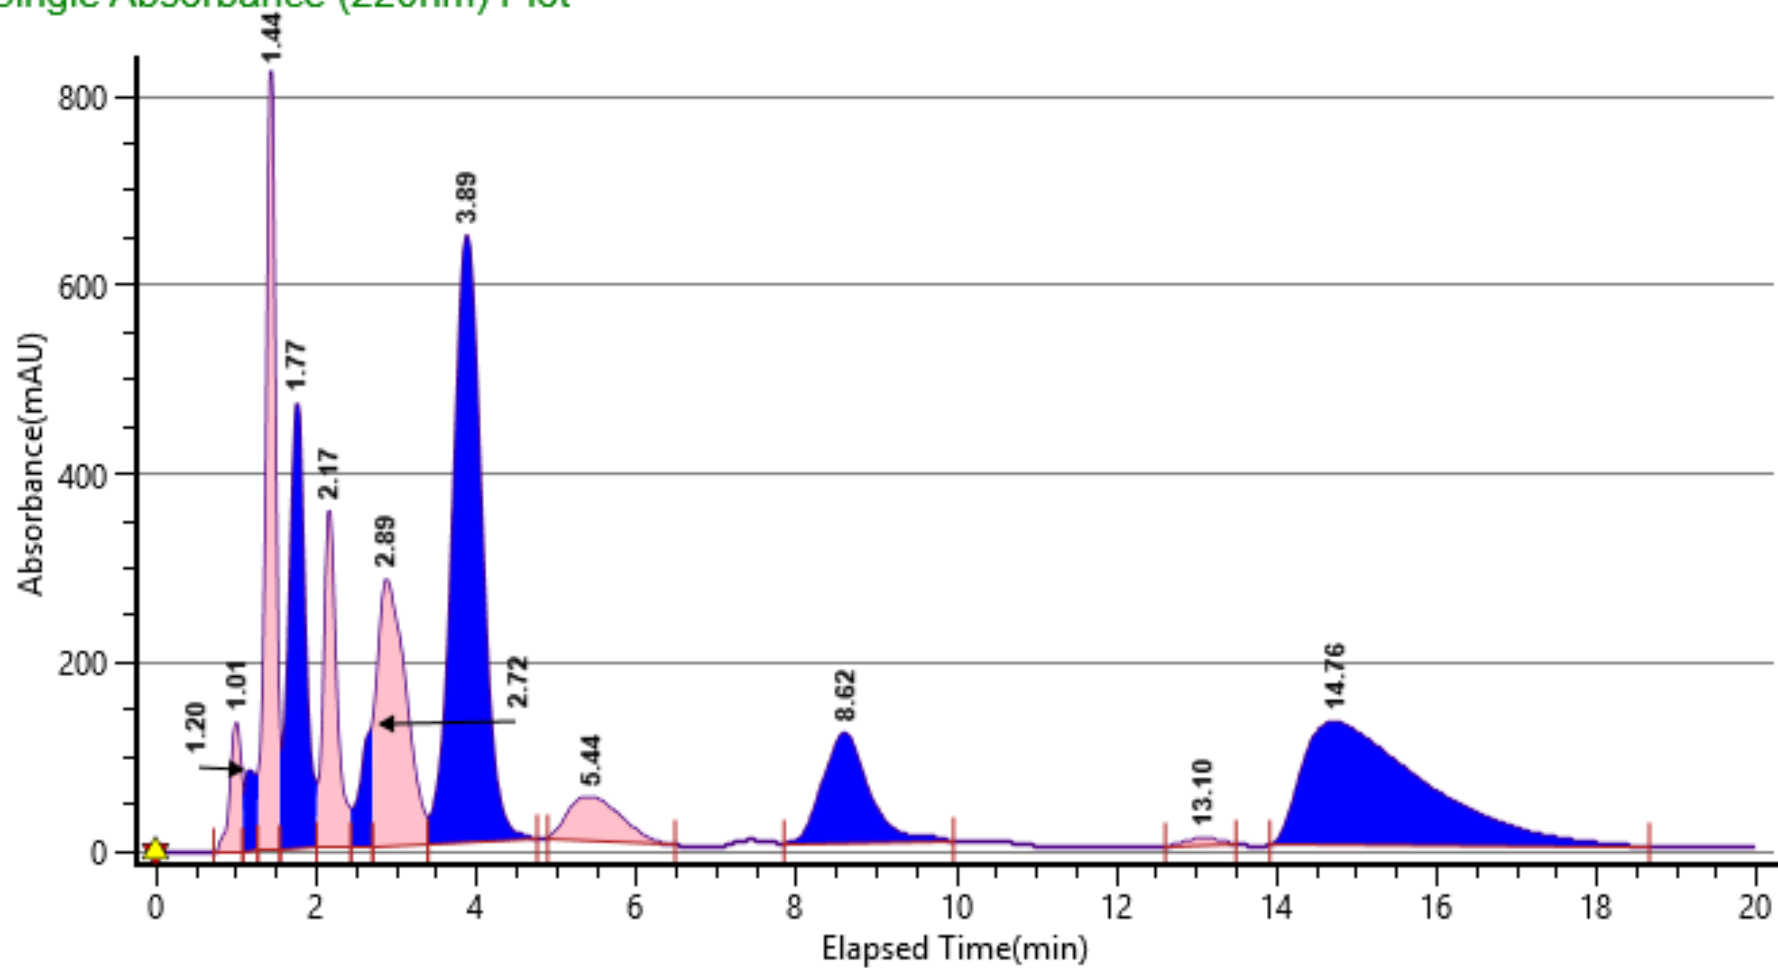

Column: Chiral ART Amylose SA

### Single Absorbance (220nm) Plot

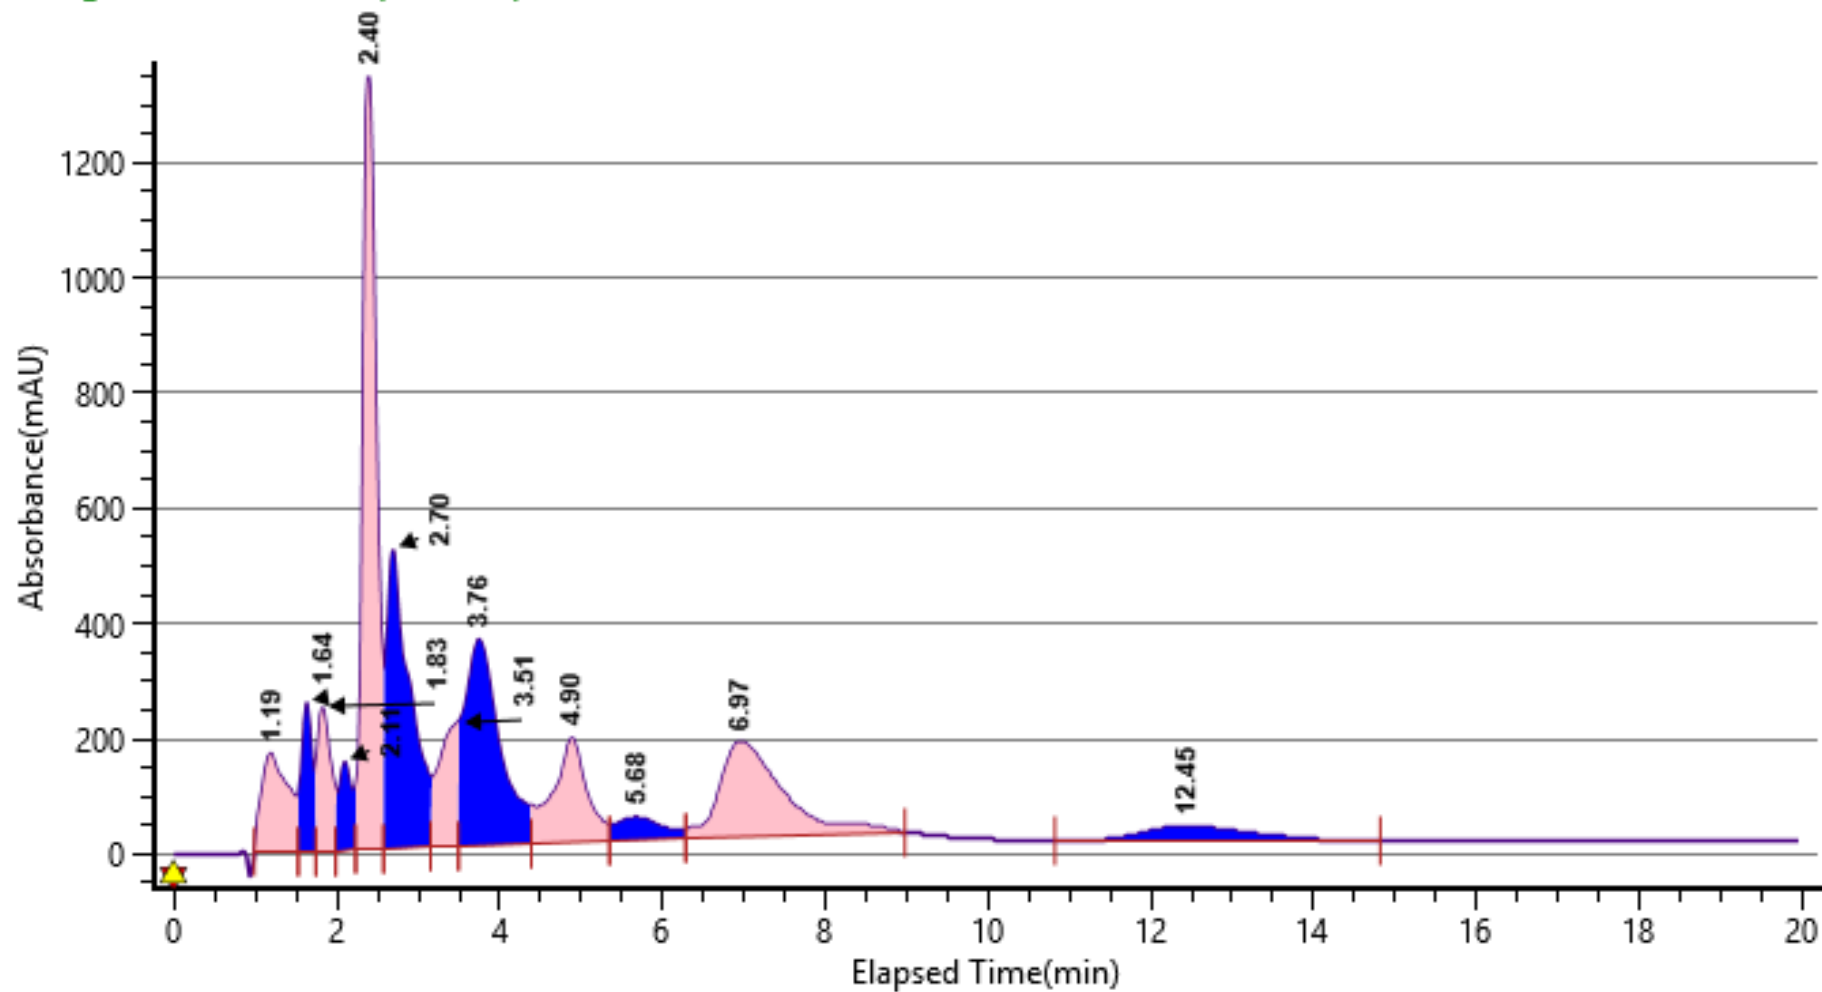



Column : (R,R)Whelk-O1

### Single Absorbance (220nm) Plot

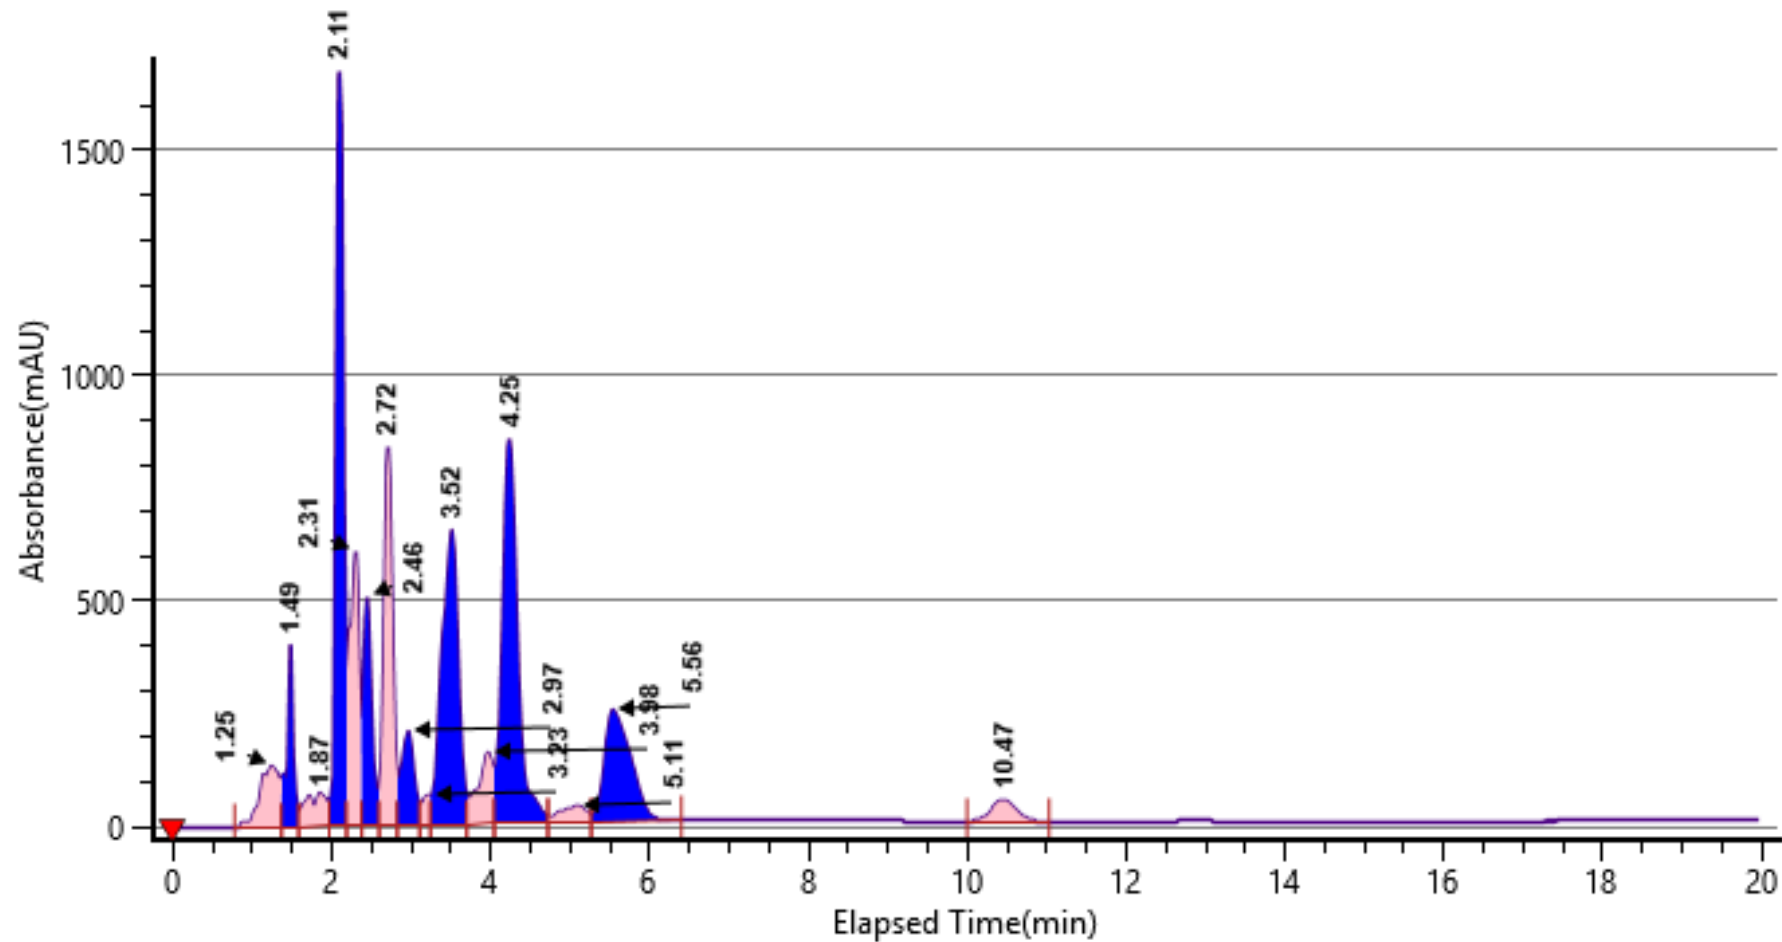

**Screening-2 various columns with Ethanol as a Co-solvent**

**Column: Daicel-P4VP**

### Single Absorbance (220nm) Plot

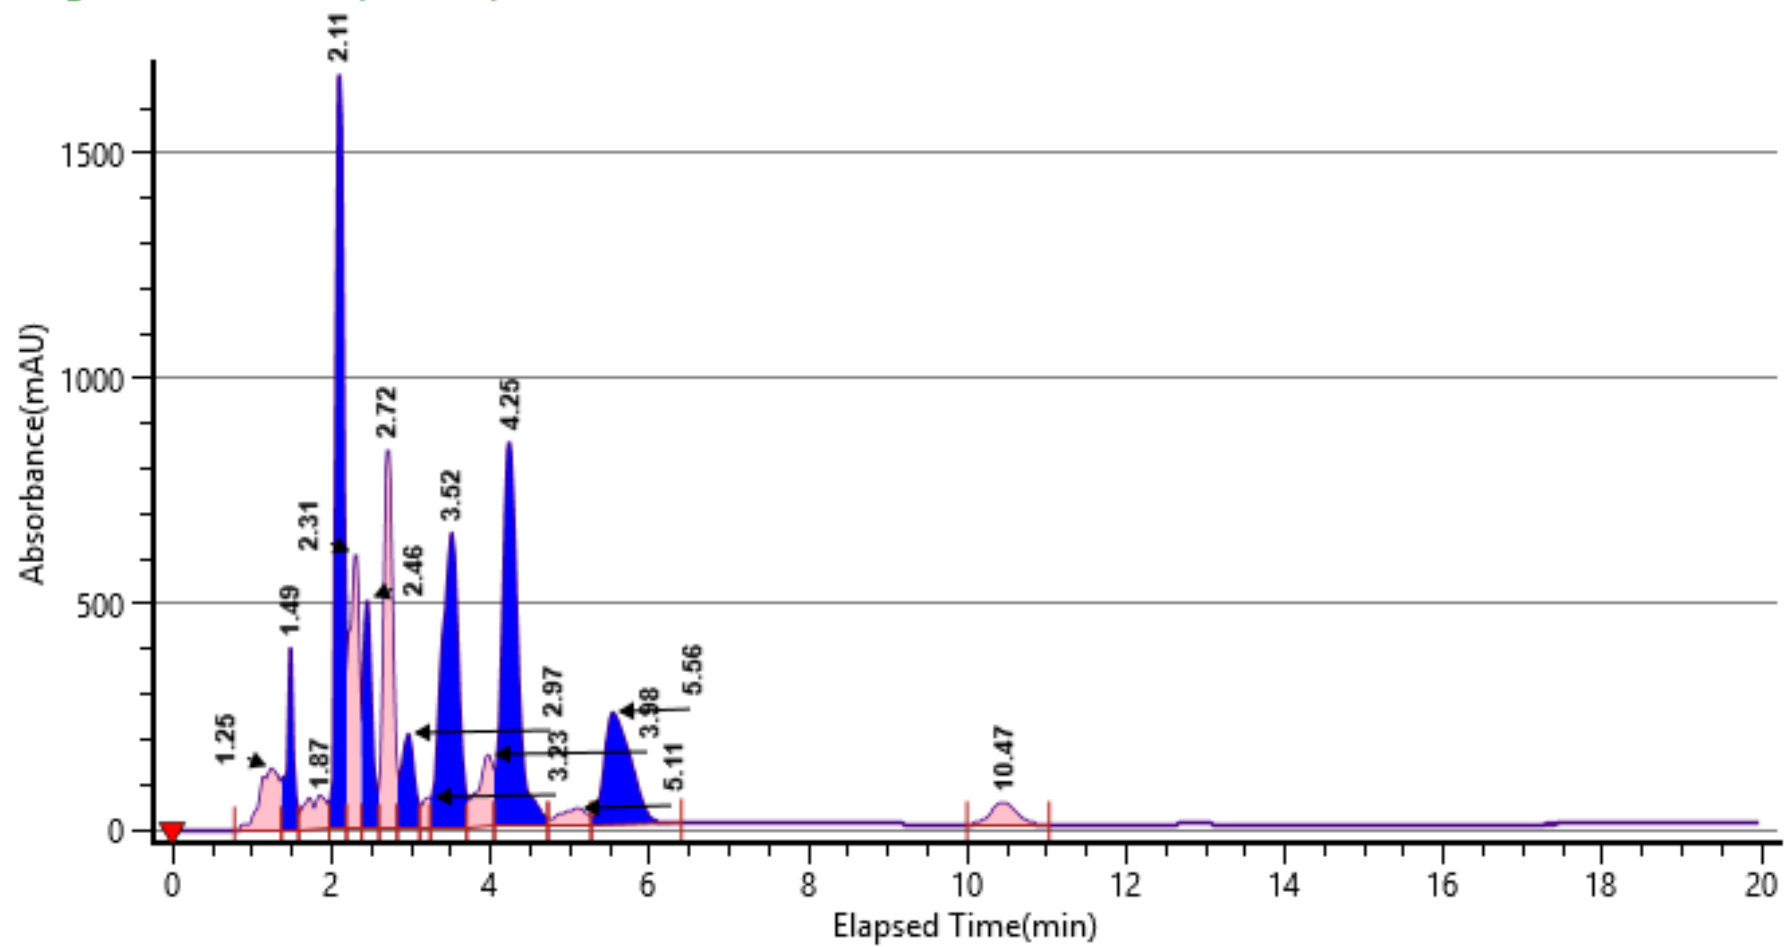

Column: LUX-i-amylose-3

### Single Absorbance (220nm) Plot

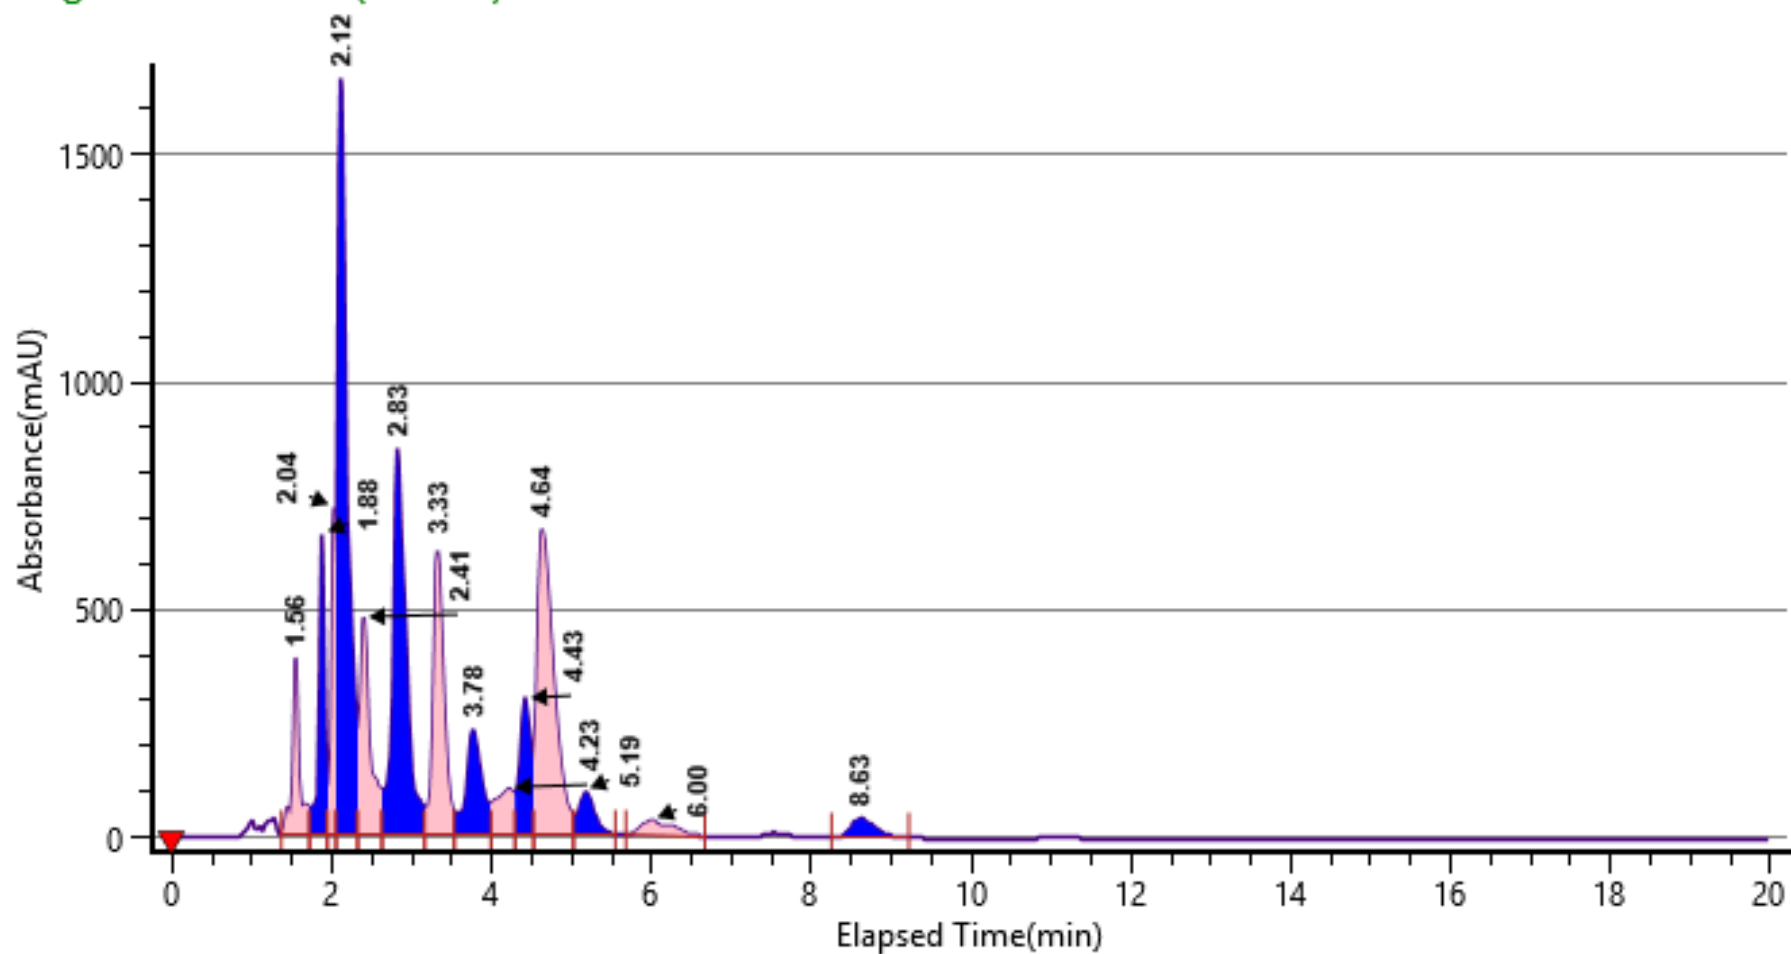

Column: Chiralpak-AD-H

### Single Absorbance (220nm) Plot

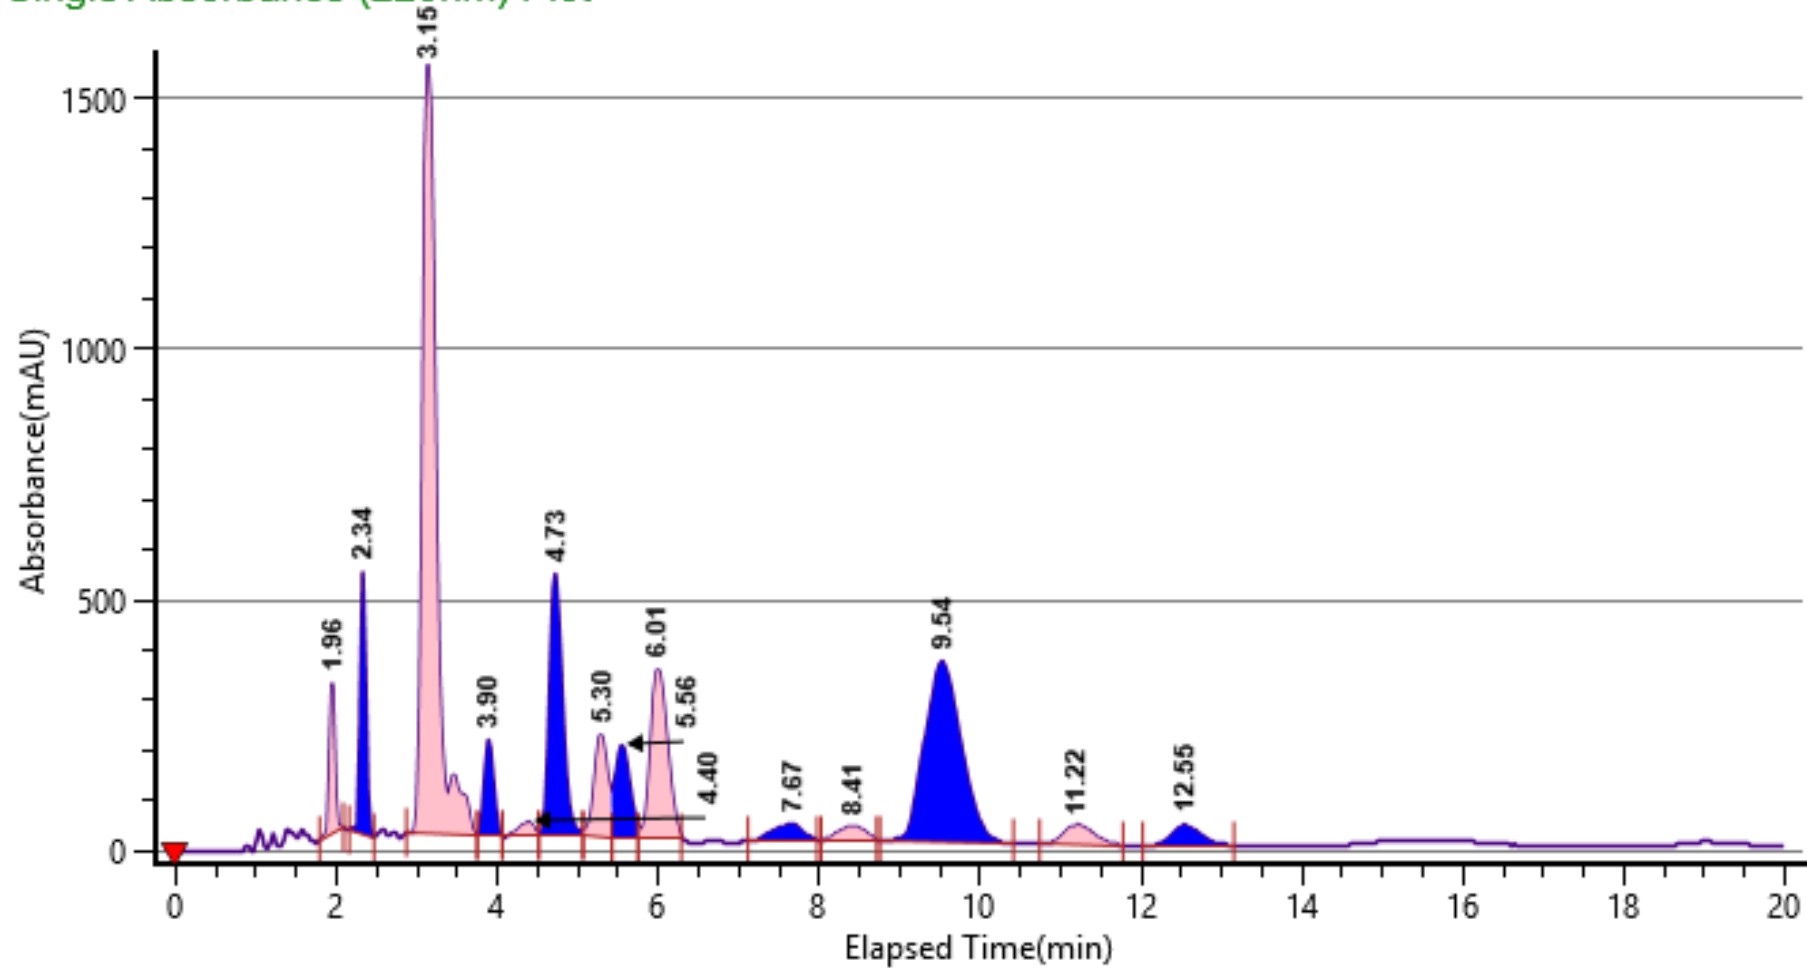

Column: LUX-amylose-2

### Single Absorbance (220nm) Plot

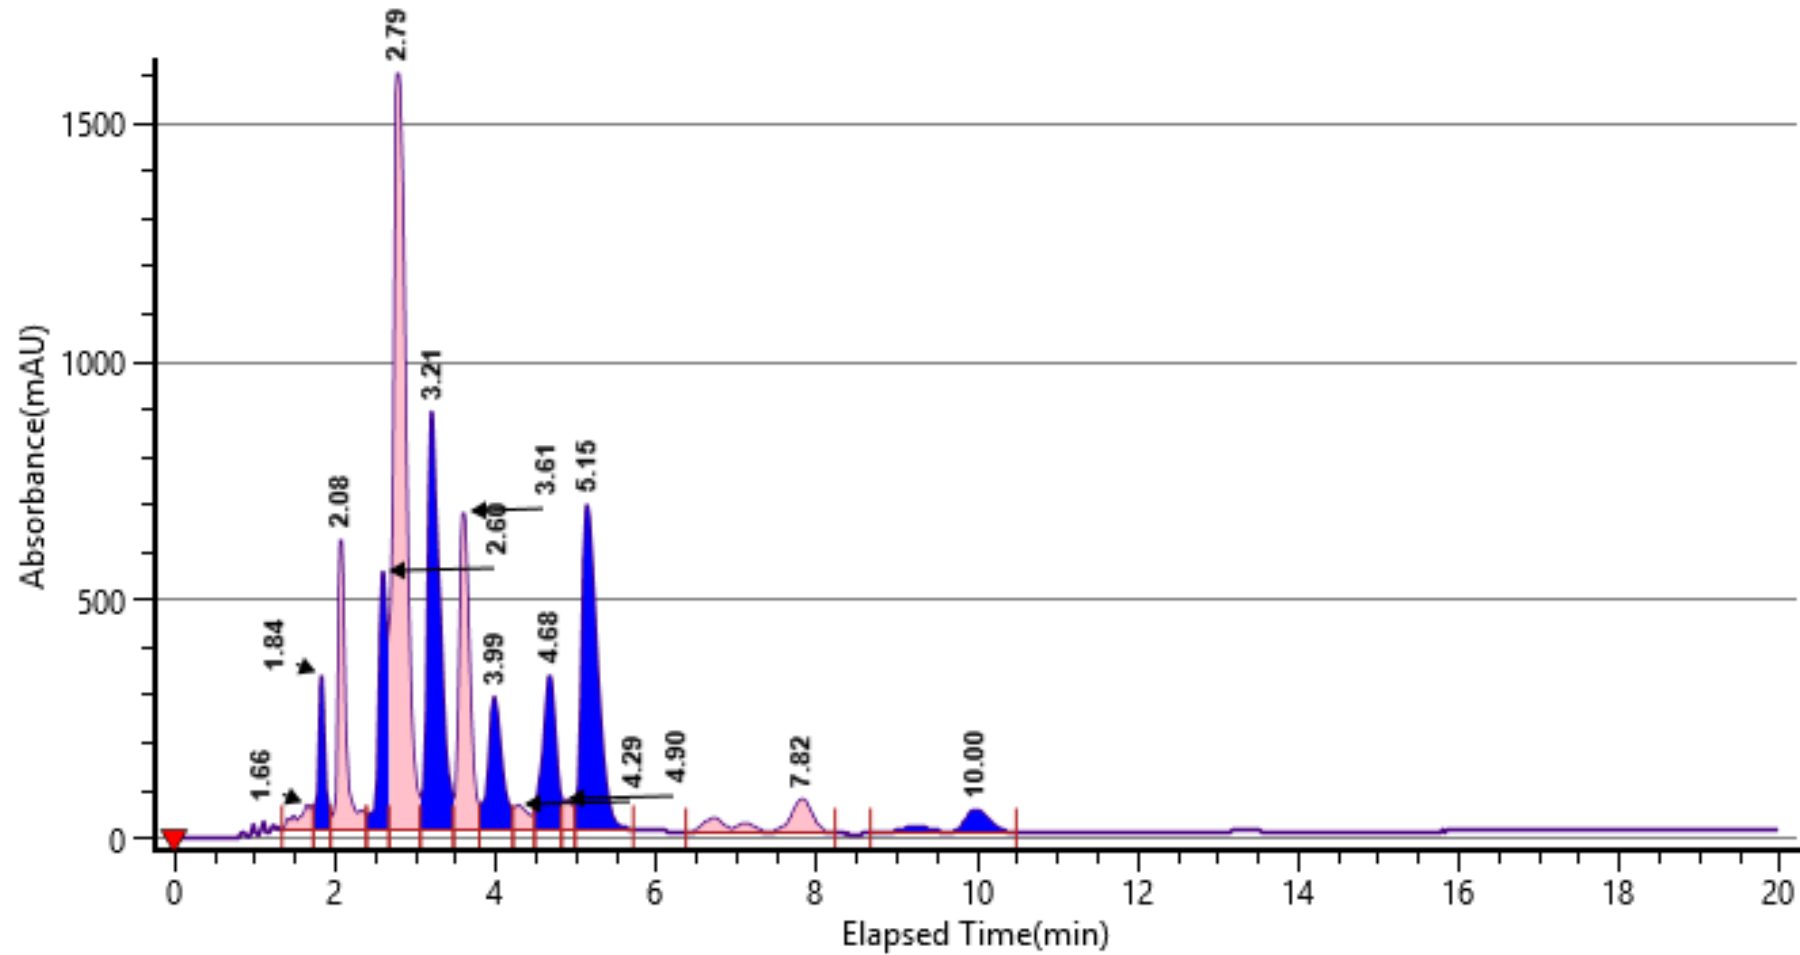

Column: Chiralpak-IG

Single Absorbance (220nm) Plot

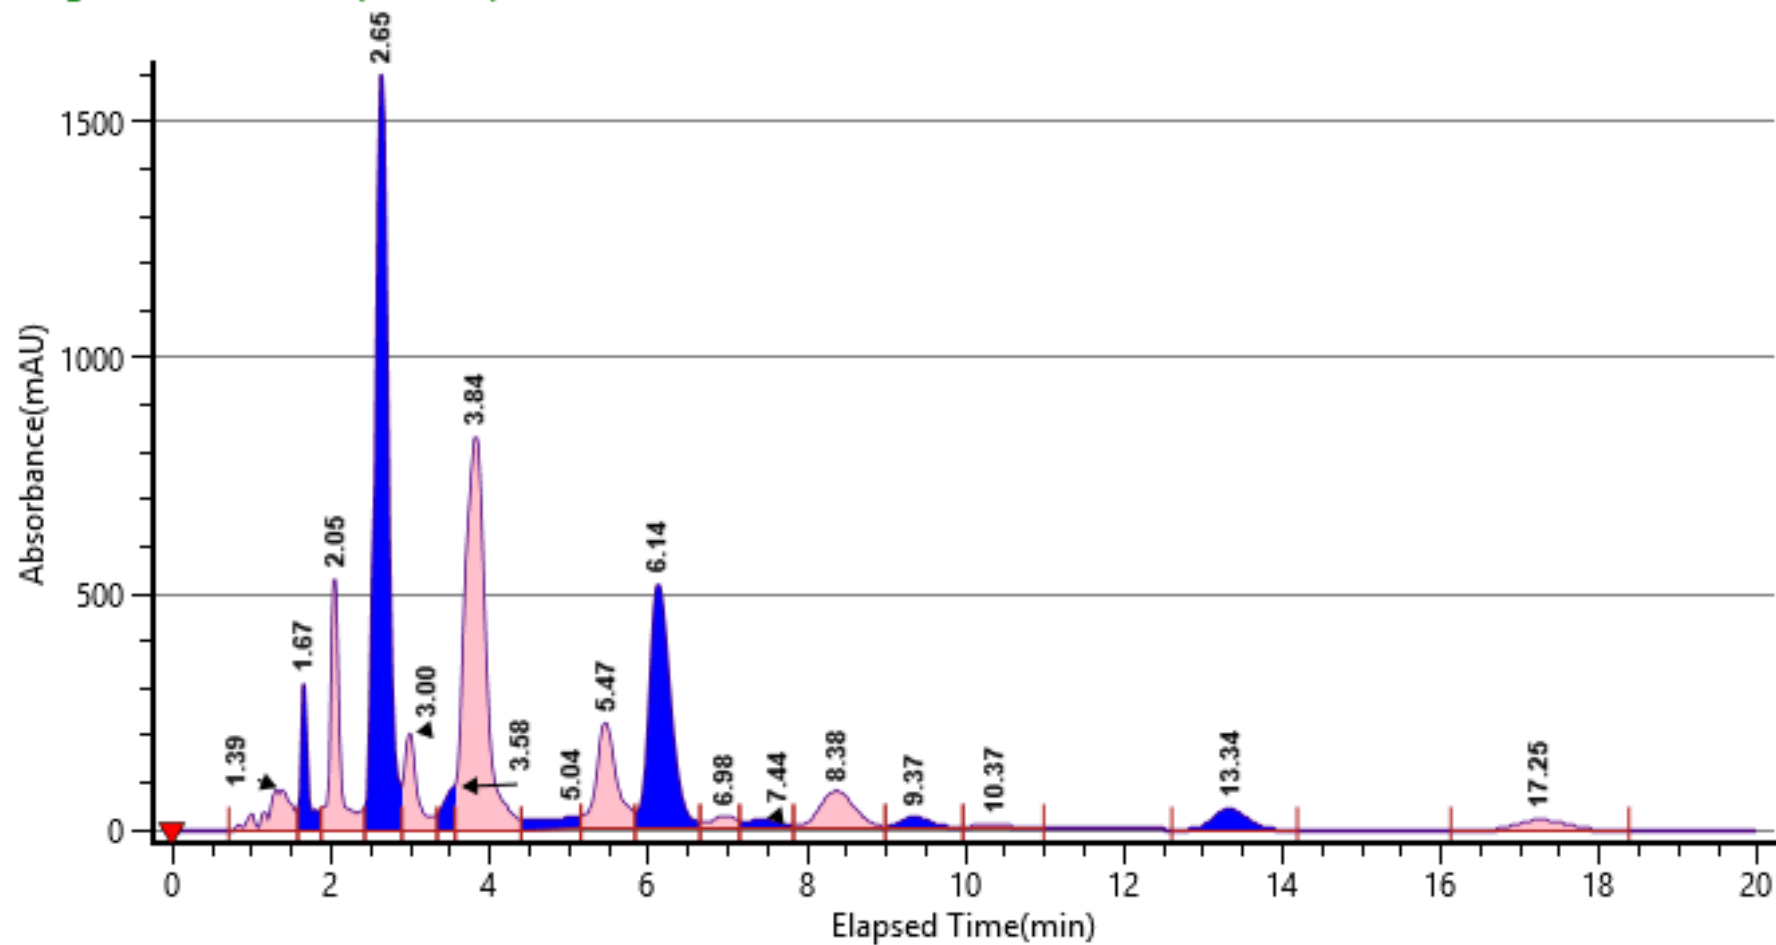

Column: Chiralpak-AS-H

### Single Absorbance (220nm) Plot

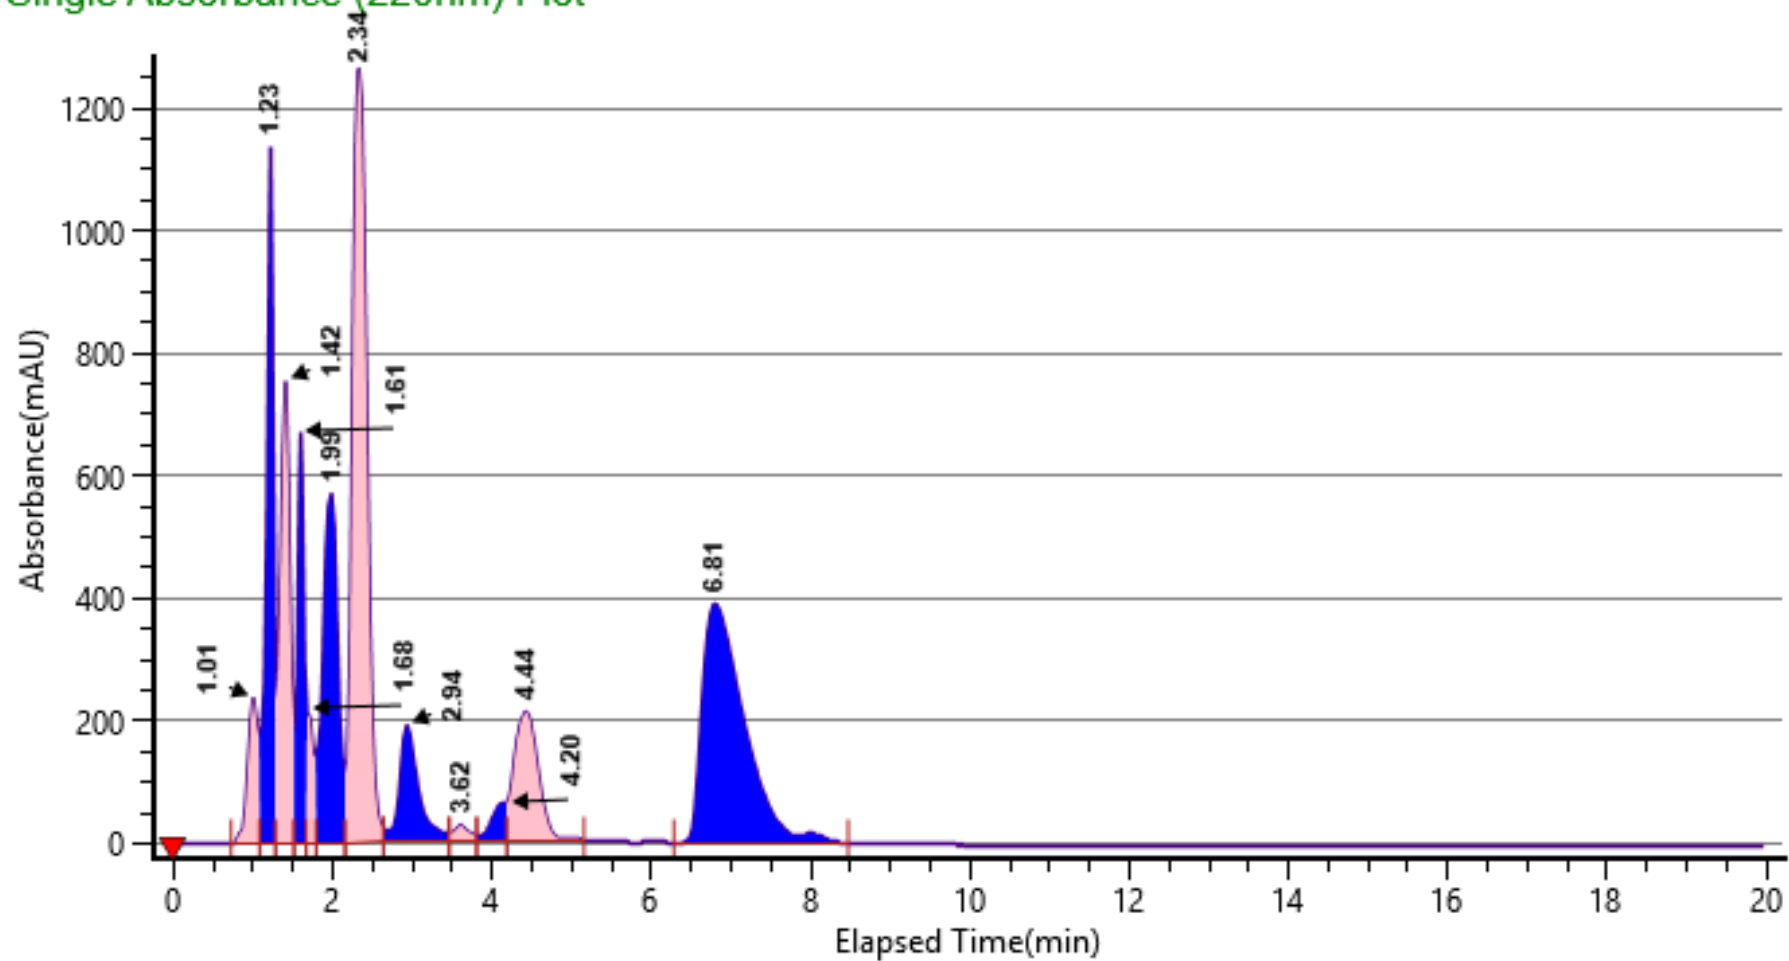



Column: Chiral ART Amylose SA

### Single Absorbance (220nm) Plot

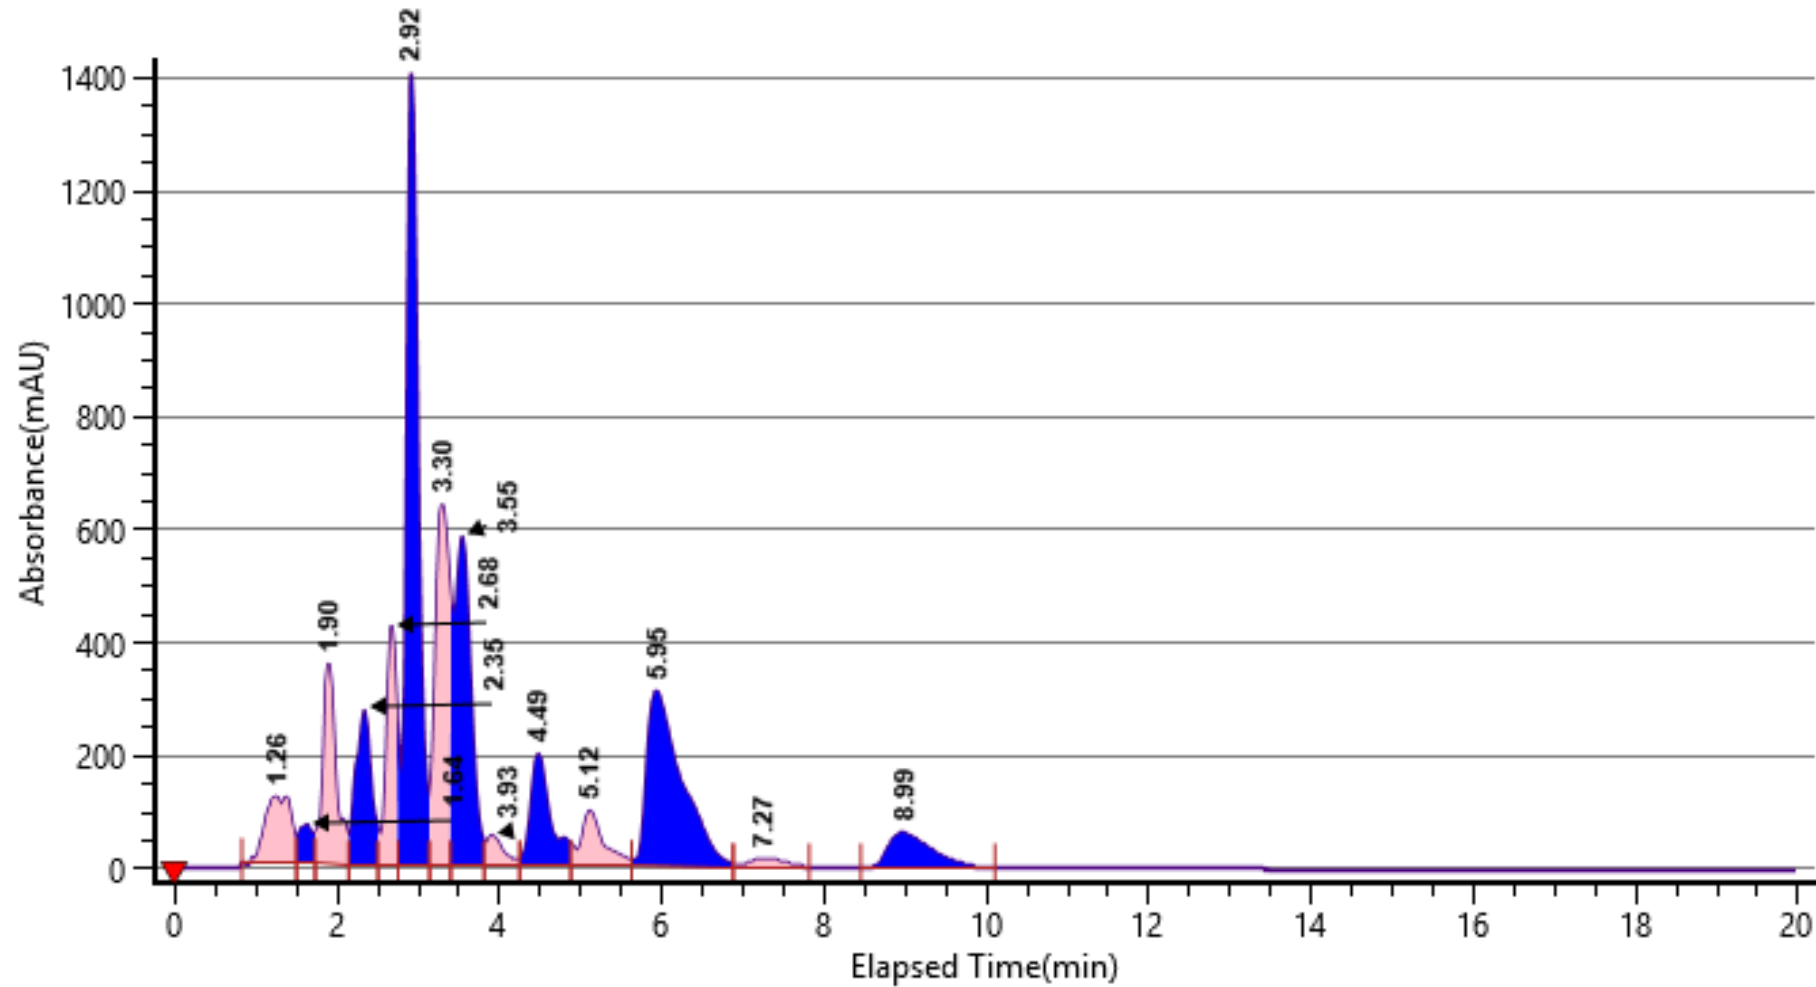

Column: (R,R) Whelk-O1

### Single Absorbance (220nm) Plot

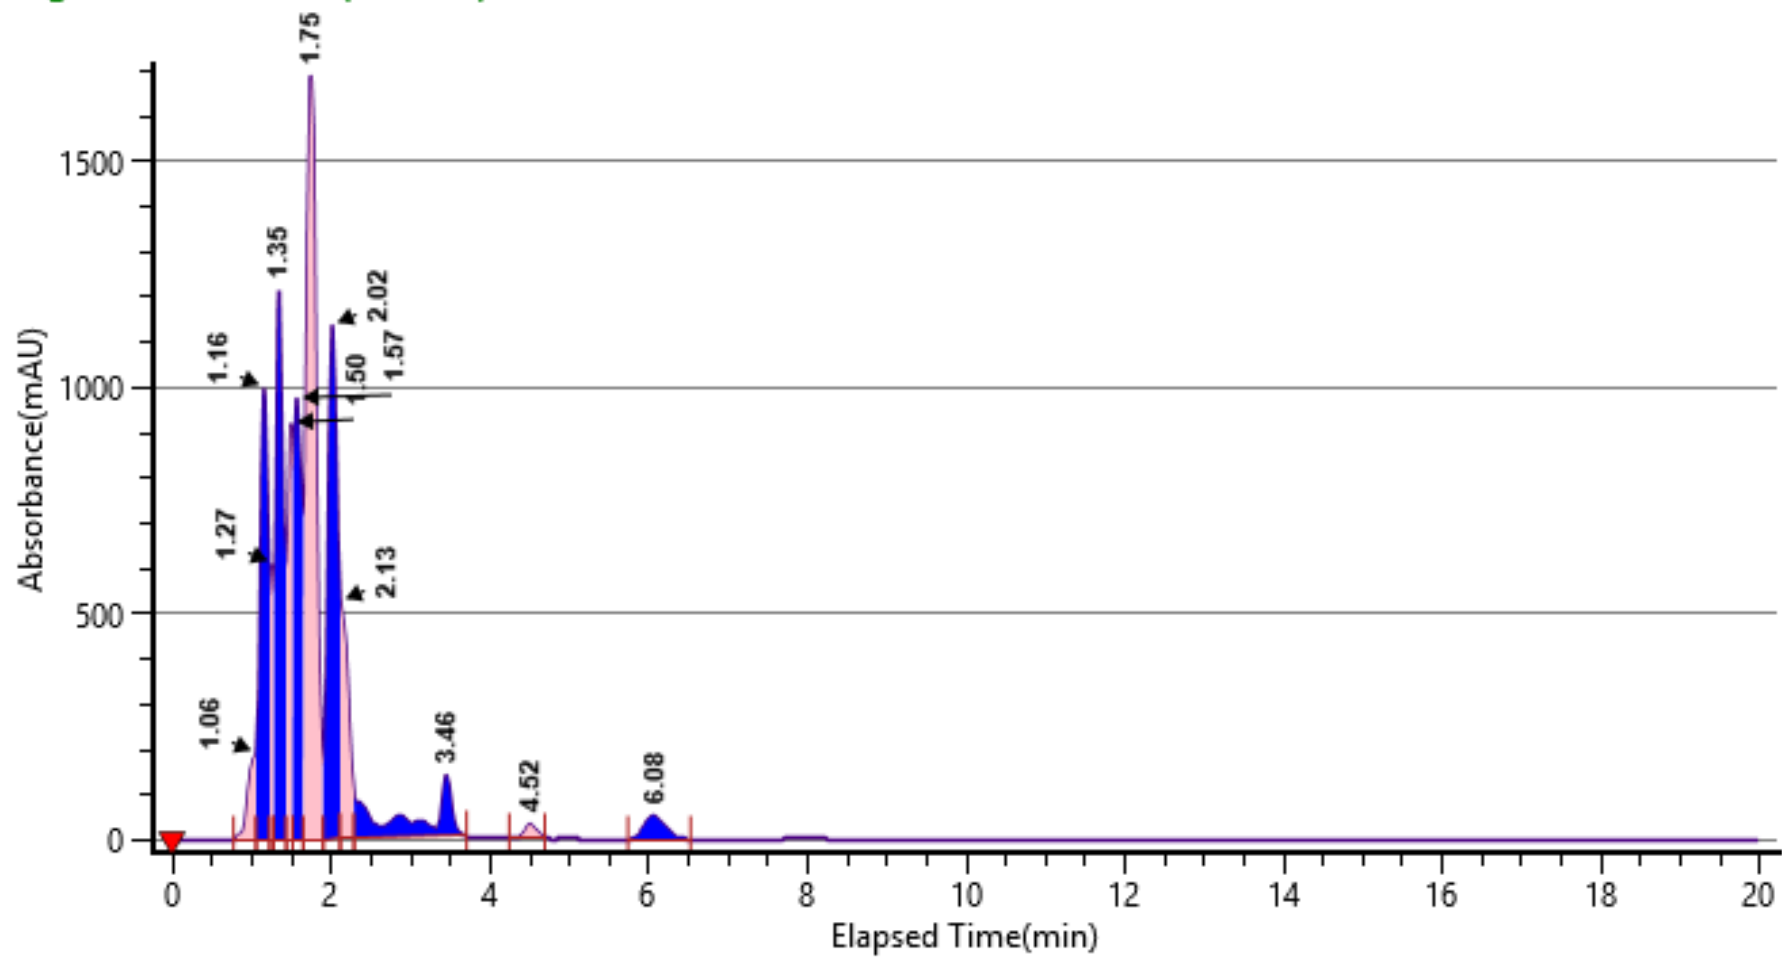

### Screening-3 various columns with Methanol as a Co-solvent

Column: Daicel-P4VP

#### Single Absorbance (220nm) Plot

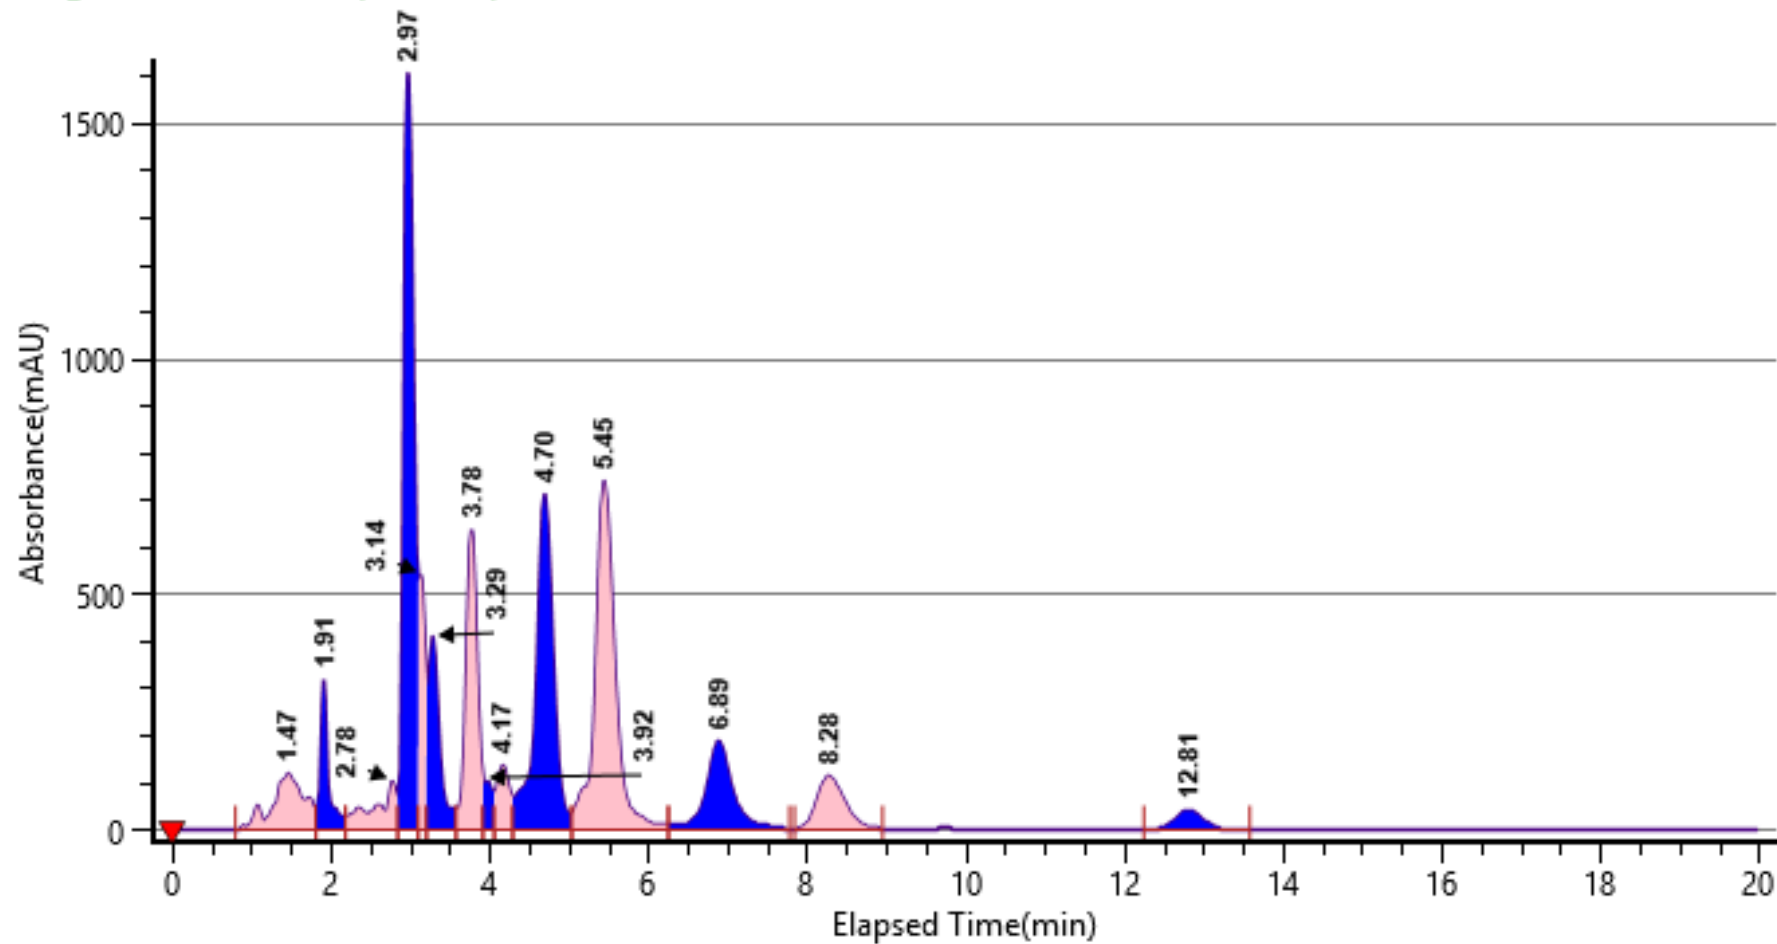

Column: LUX-i-amylose-3

Single Absorbance (220nm) Plot

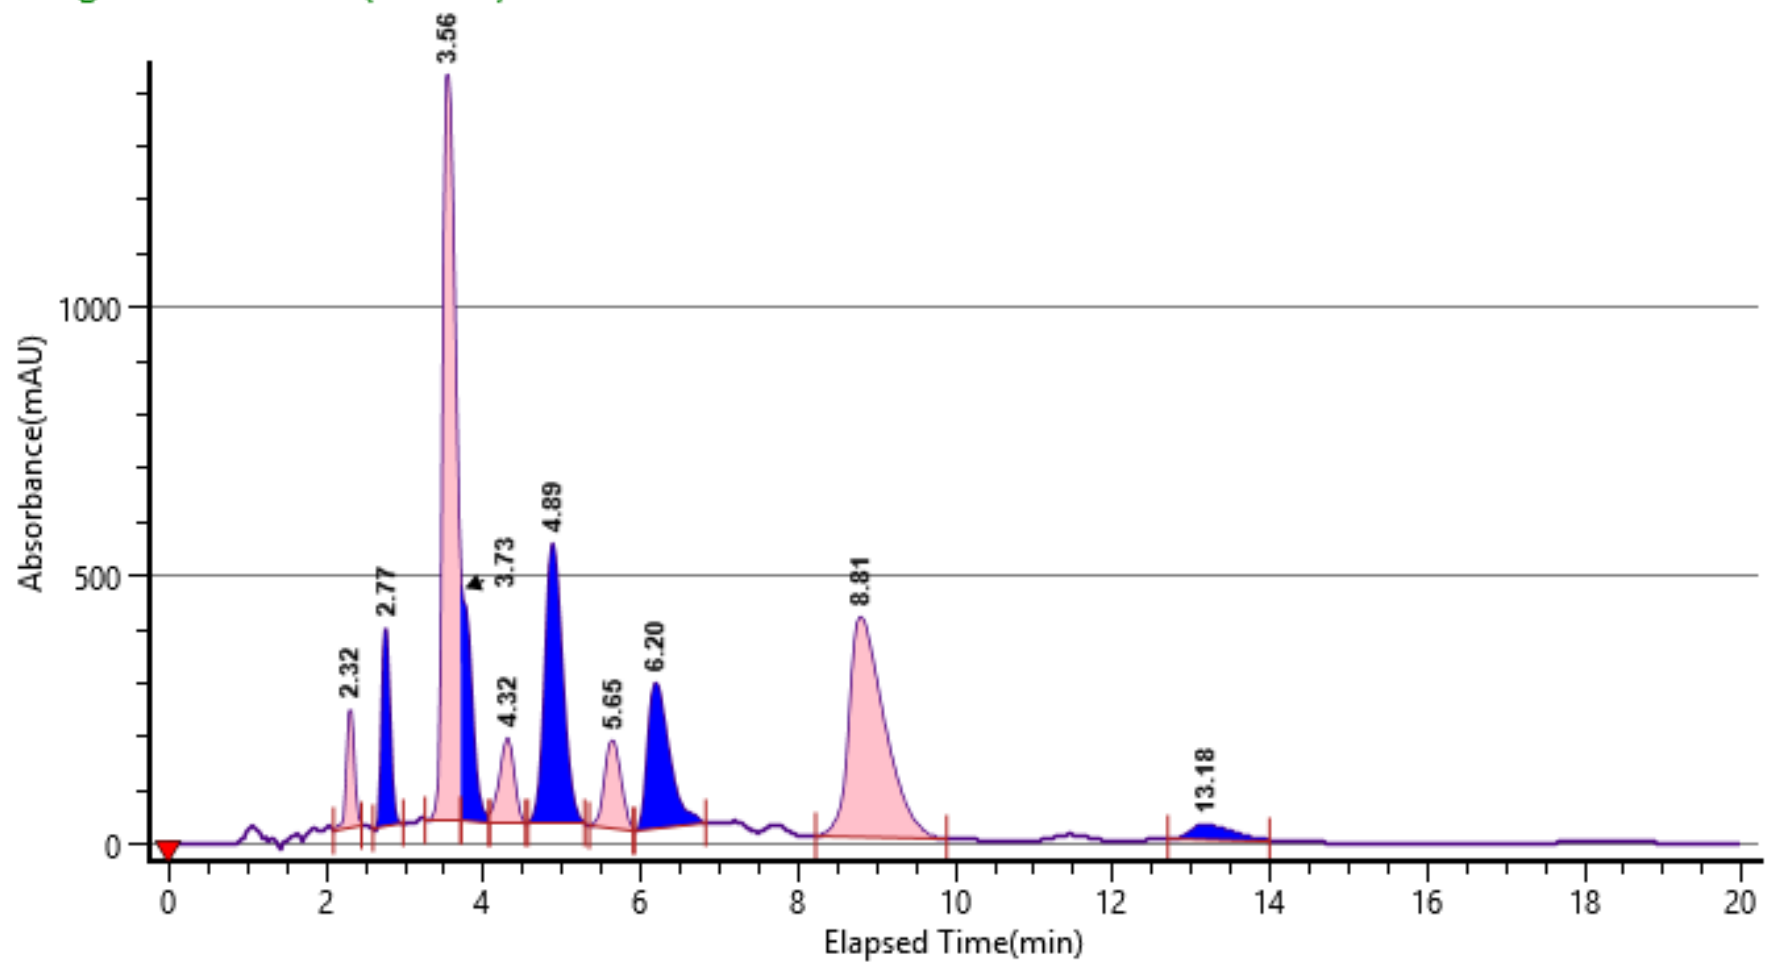

Column: Chiralpak-AD-H

### Single Absorbance (220nm) Plot

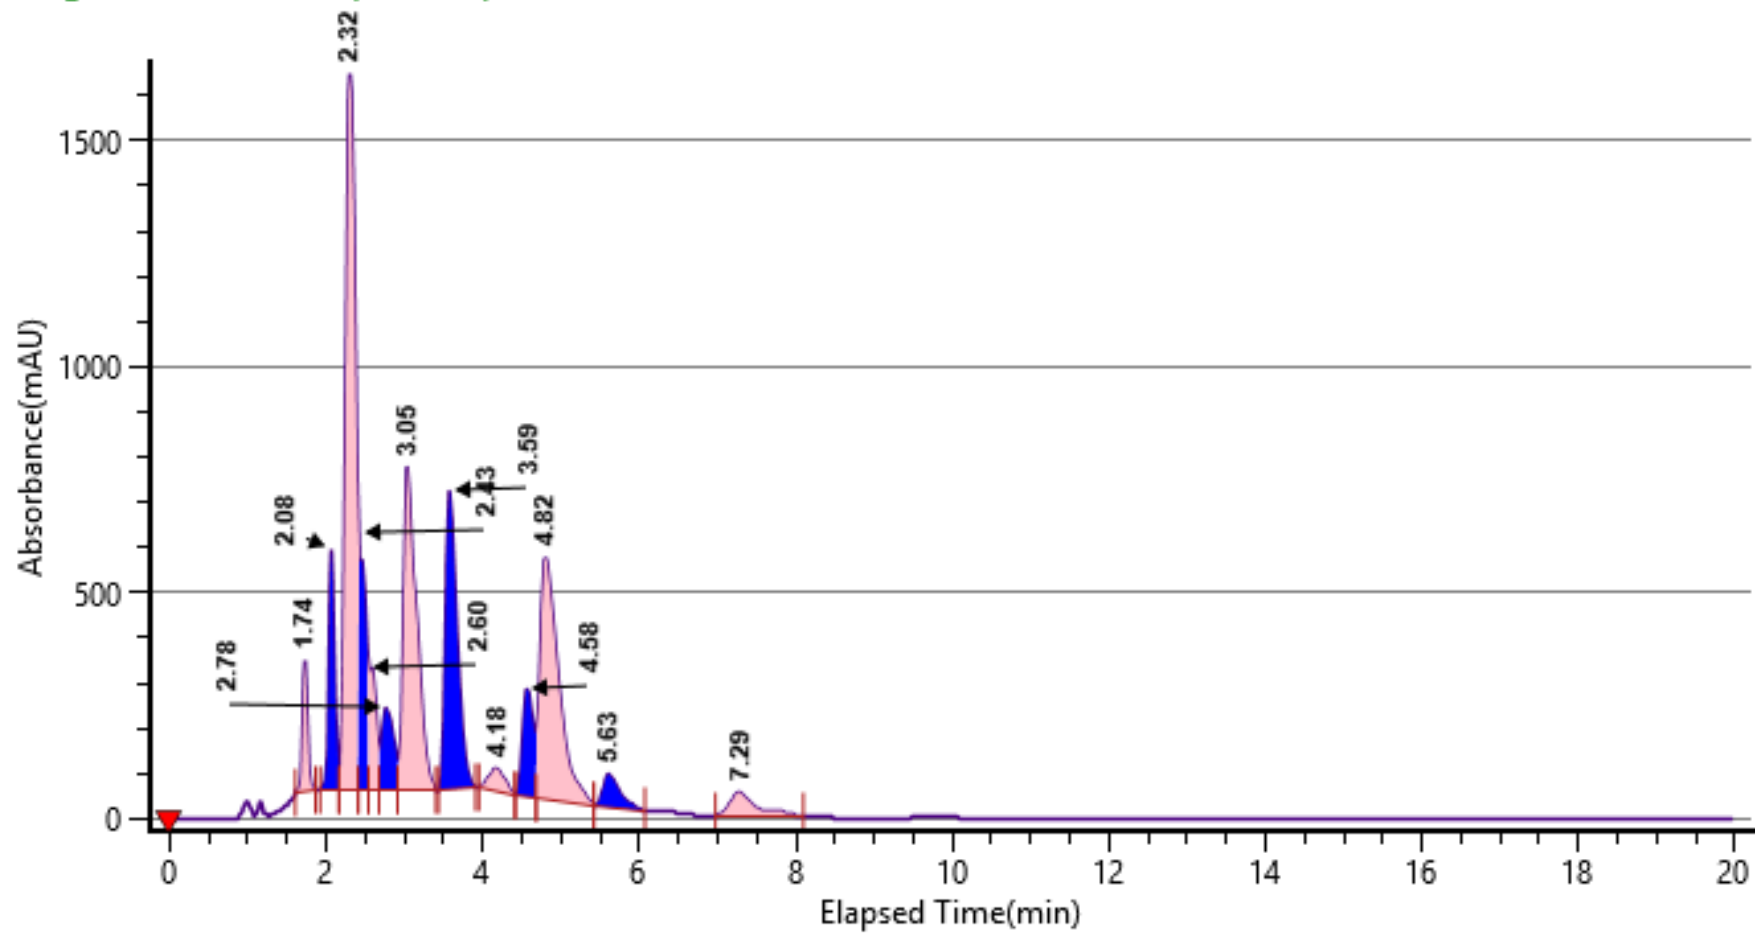

Column: LUX-amylose-2

### Single Absorbance (220nm) Plot

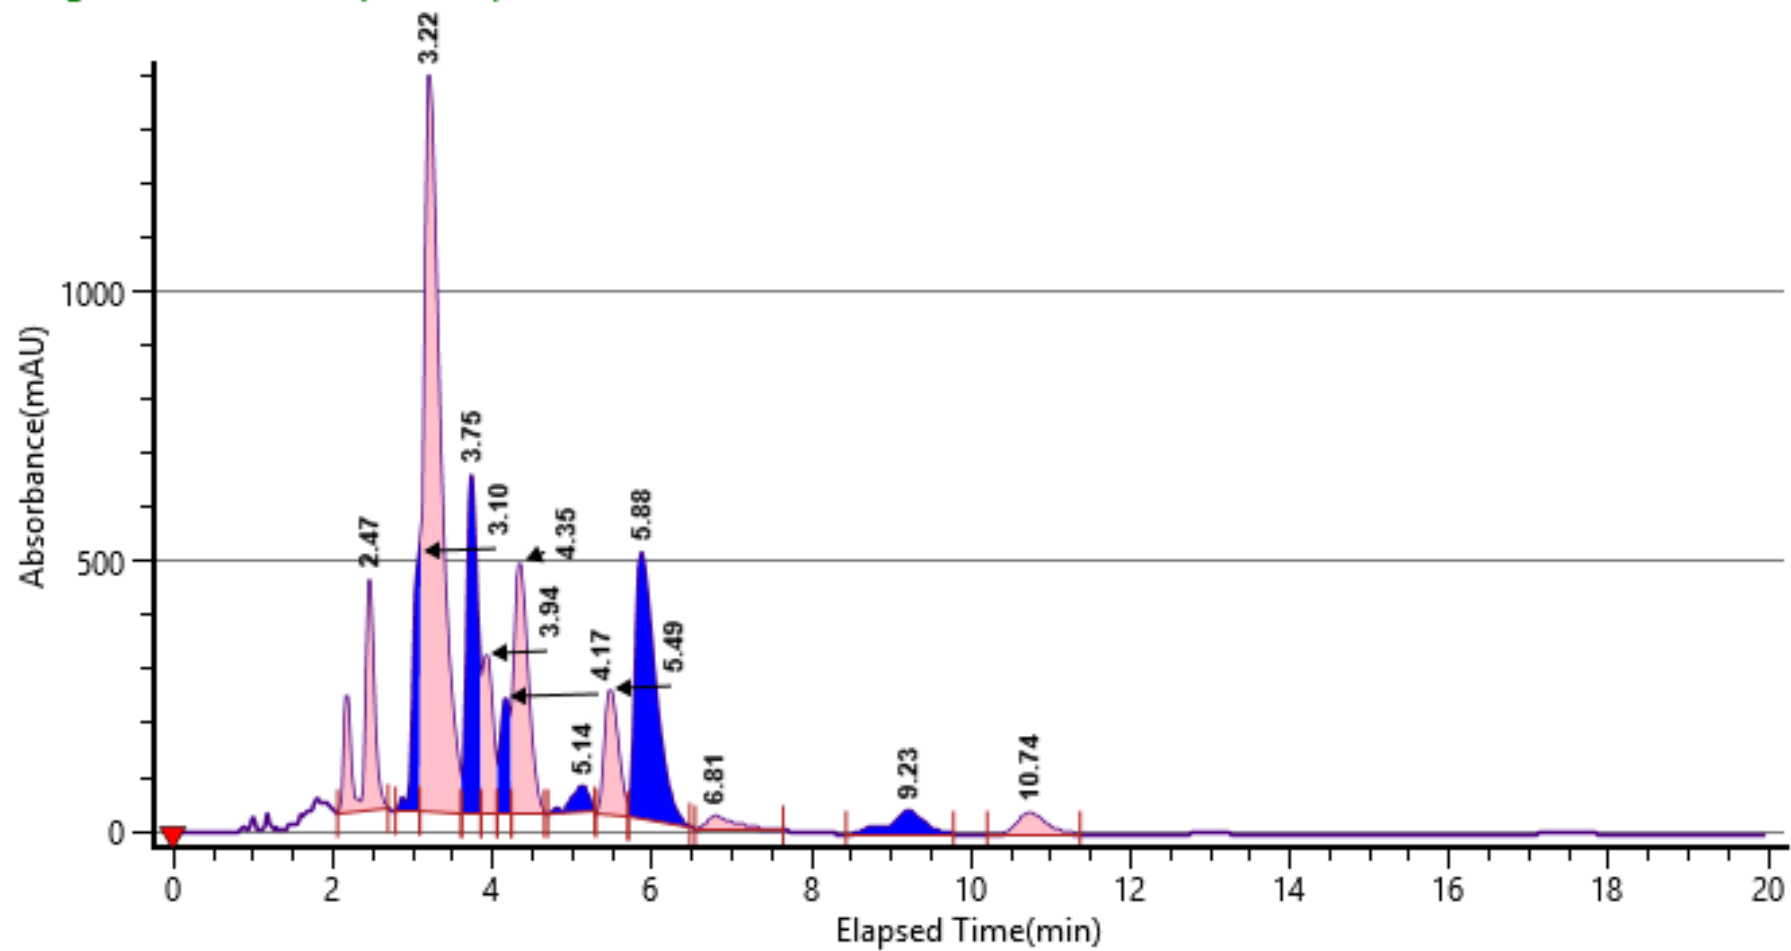

Column: Chiralpak-IG

Single Absorbance (220nm) Plot

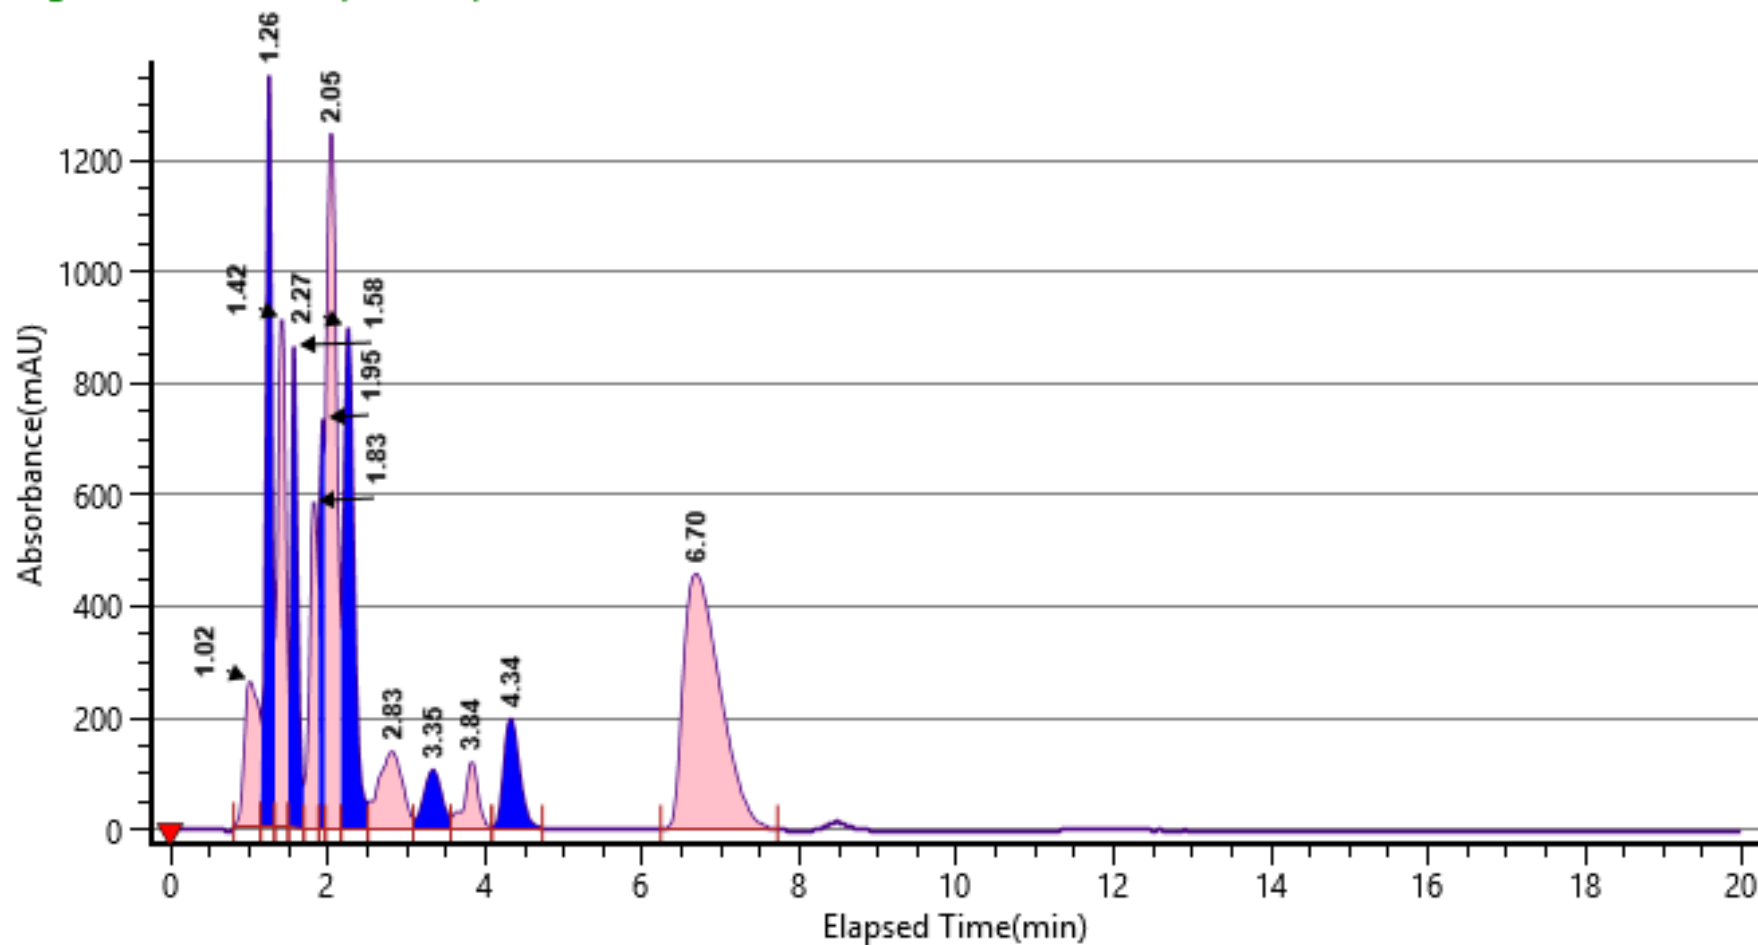

**Column: Chiralpak-AS-H**



### Single Absorbance (220nm) Plot

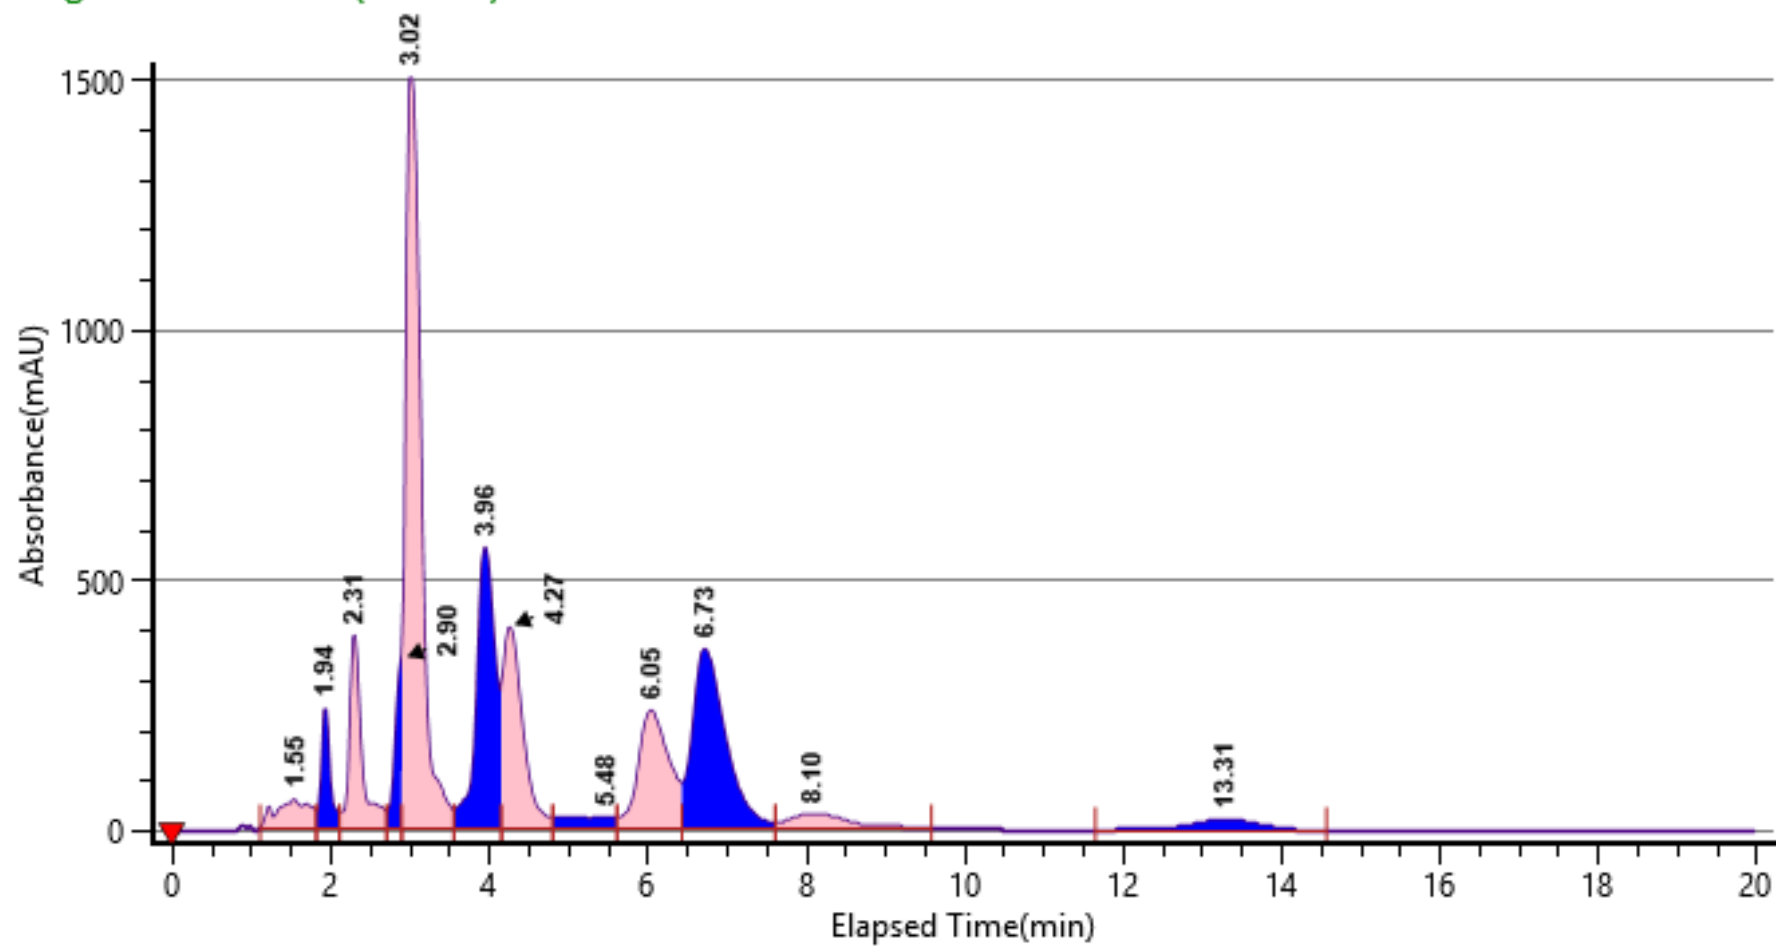

Column: Chiral-ART Amylose SA

### Single Absorbance (220nm) Plot

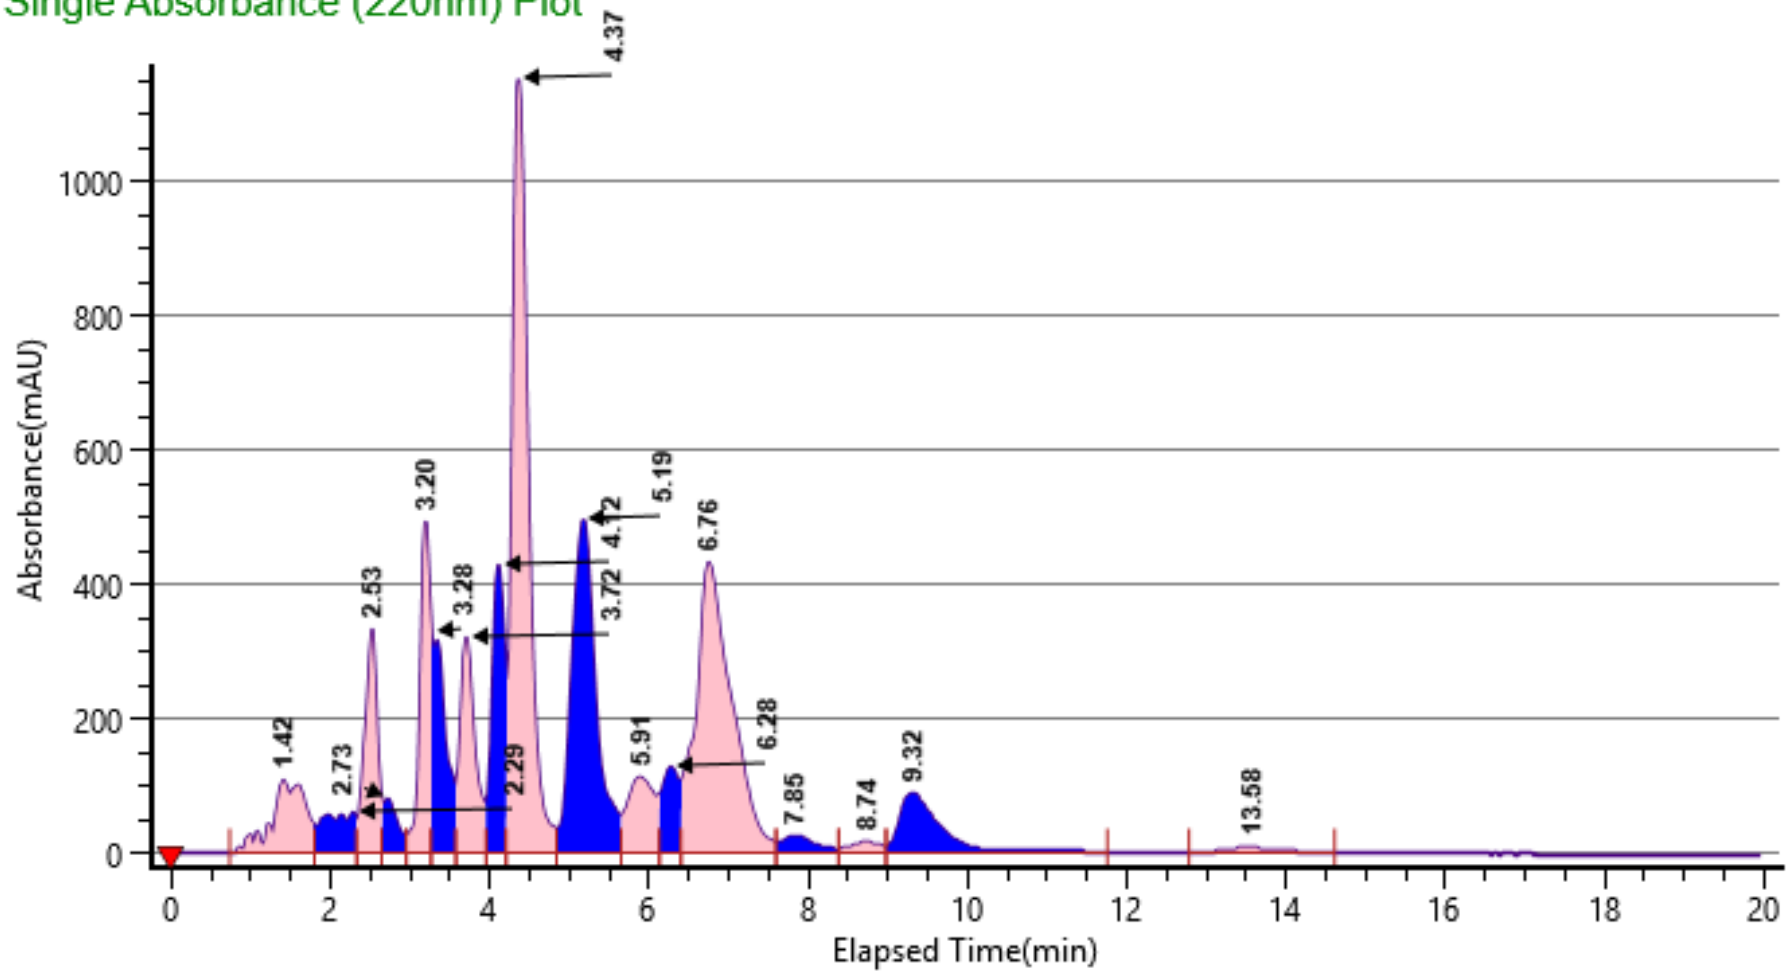

Column: (R,R) Whelk-O1

### Single Absorbance (220nm) Plot

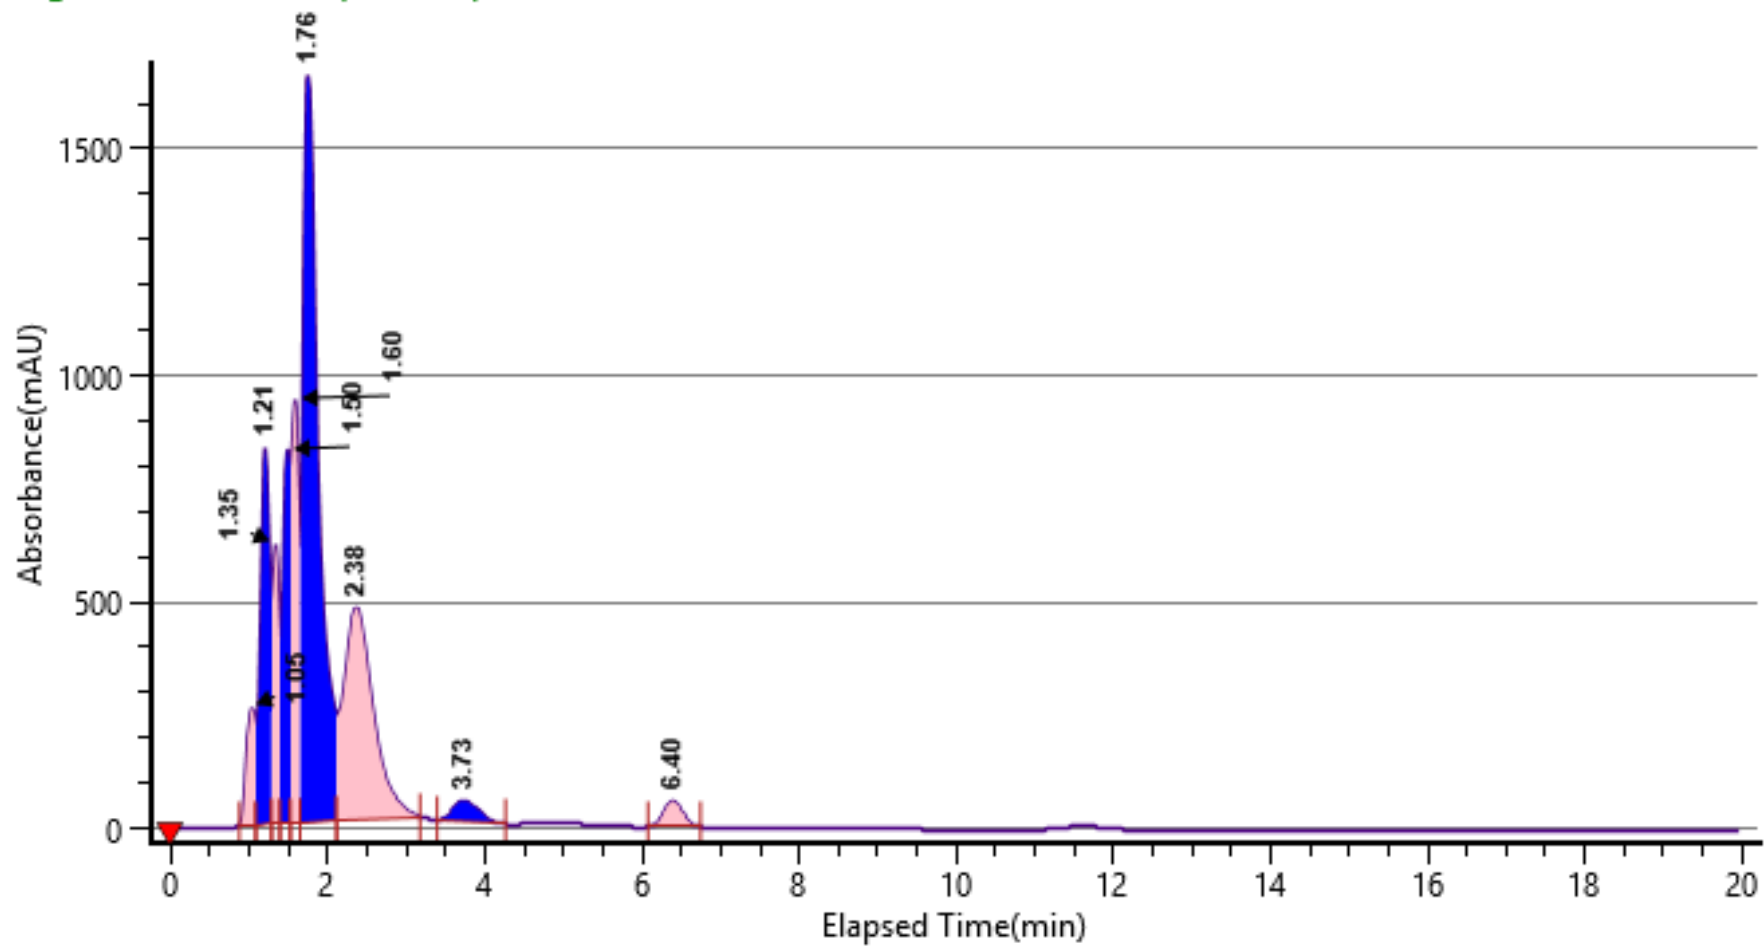

Screening-4 various columns with Acetonitrile as a Co-solvent

Column: Daicel-P4VP

Single Absorbance (220nm) Plot

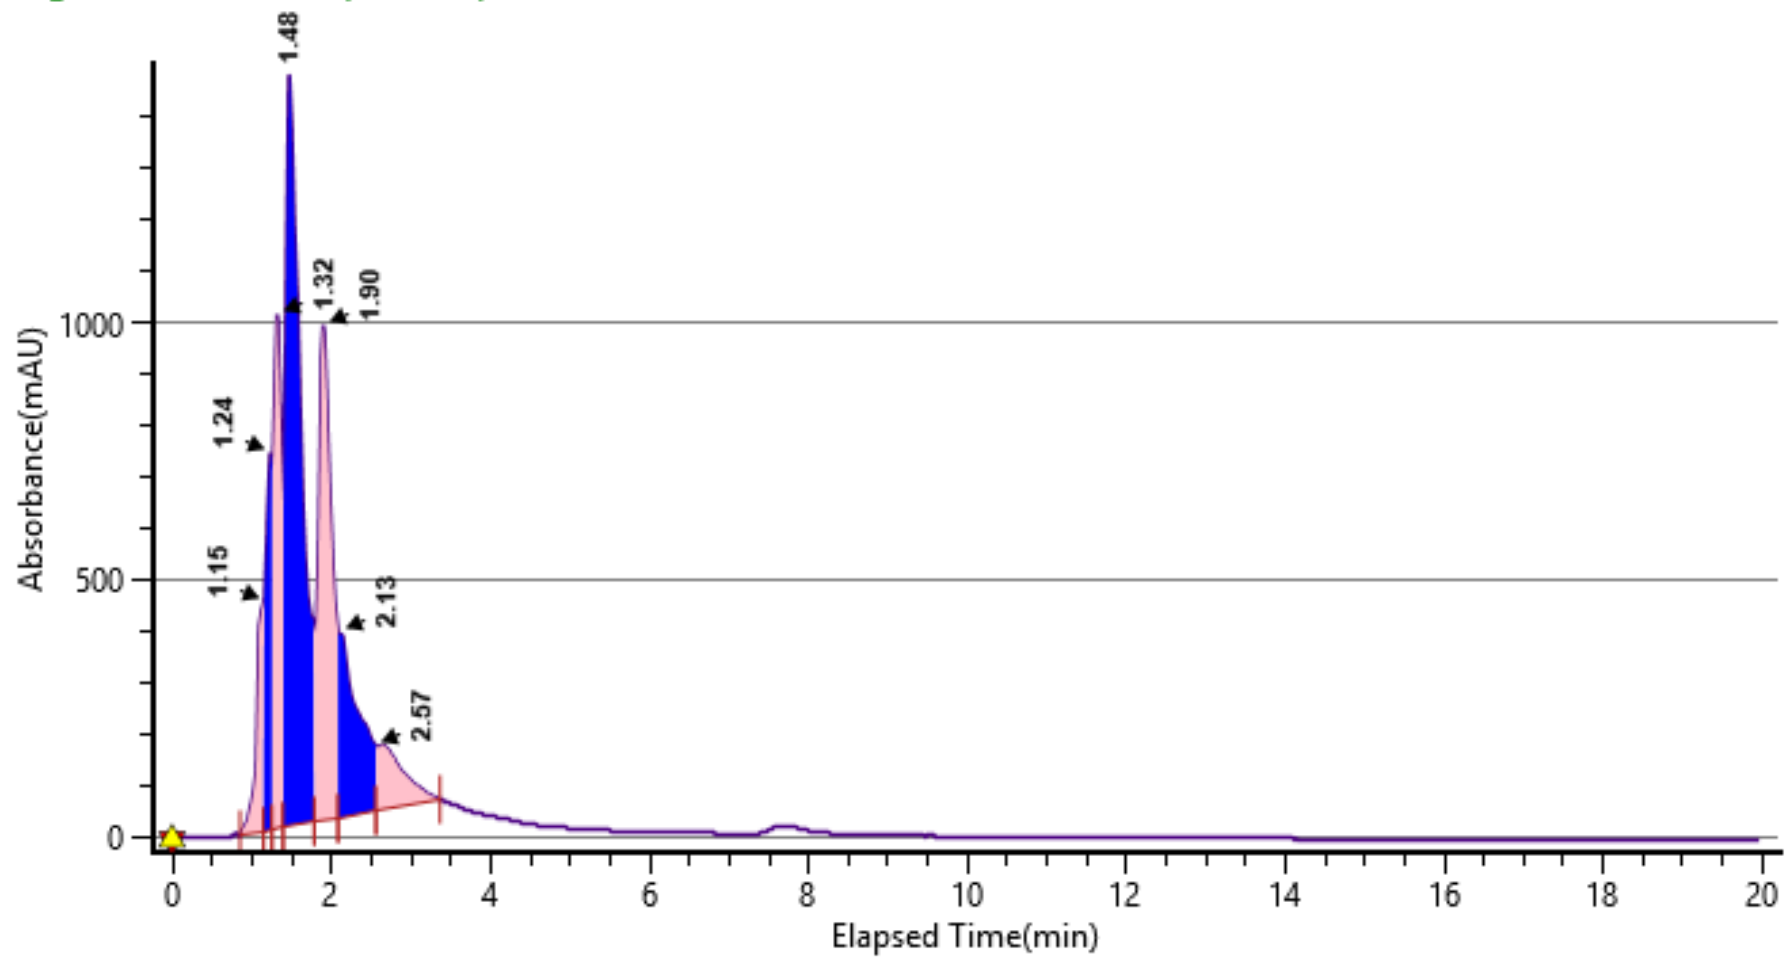

Column: LUX-i-amylose-3

Single Absorbance (220nm) Plot

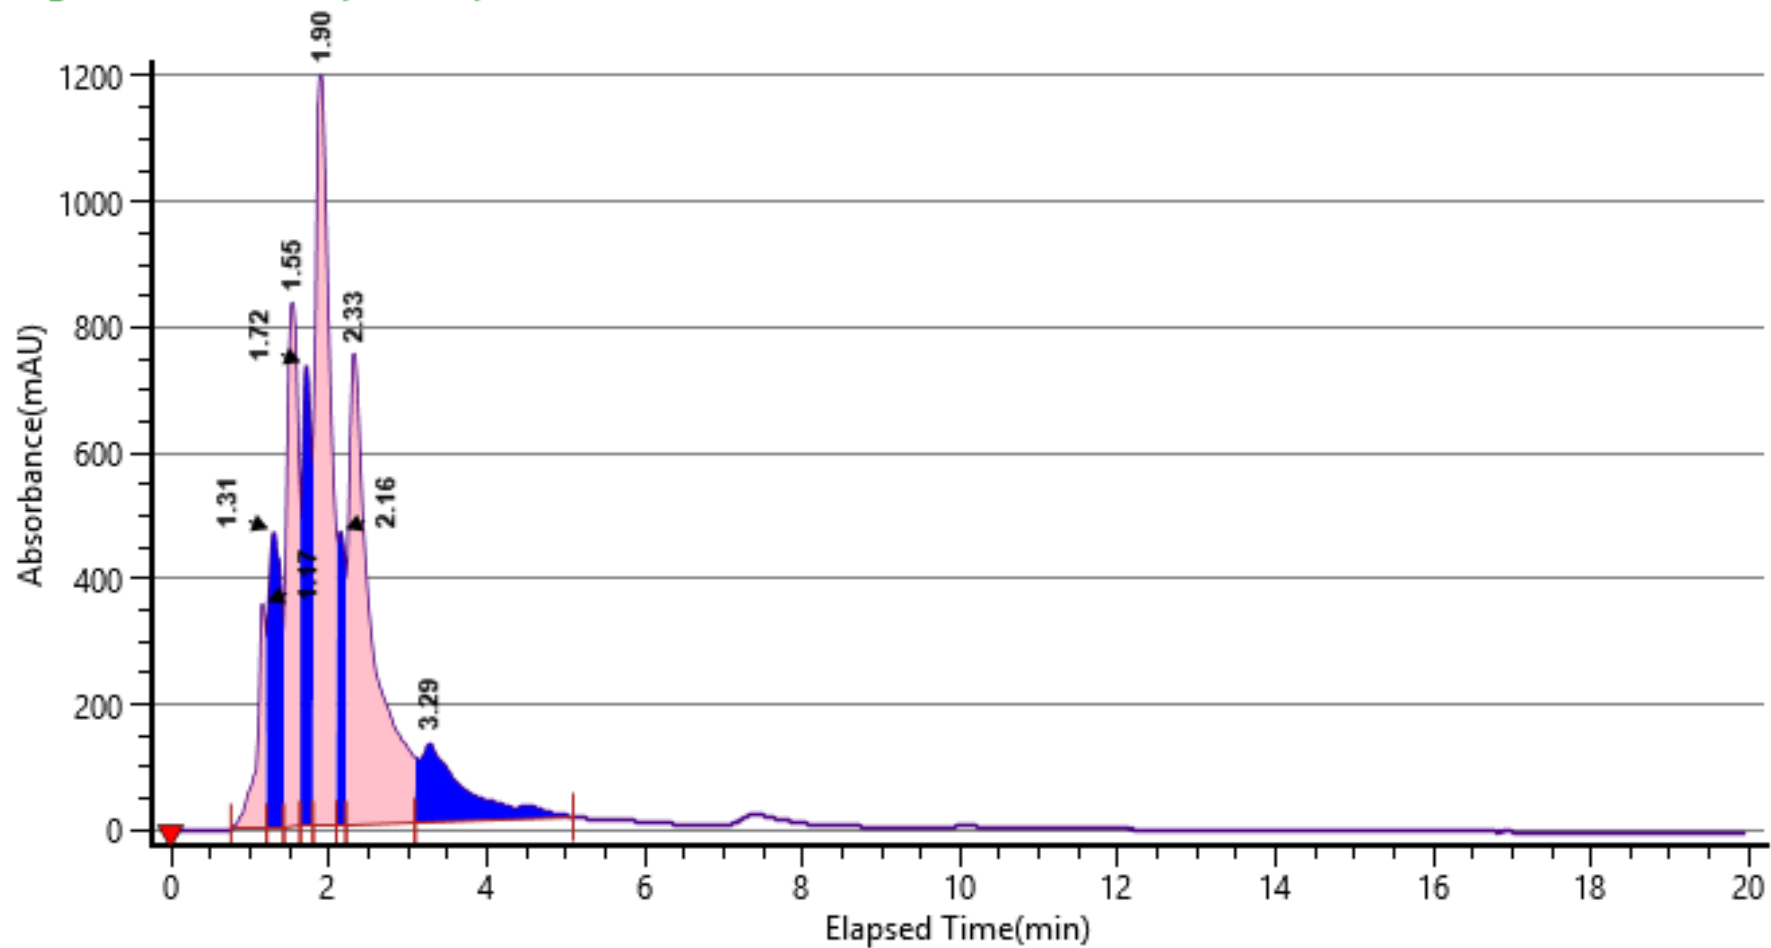

Column: Chiralpak-AD-H

Single Absorbance (220nm) Plot

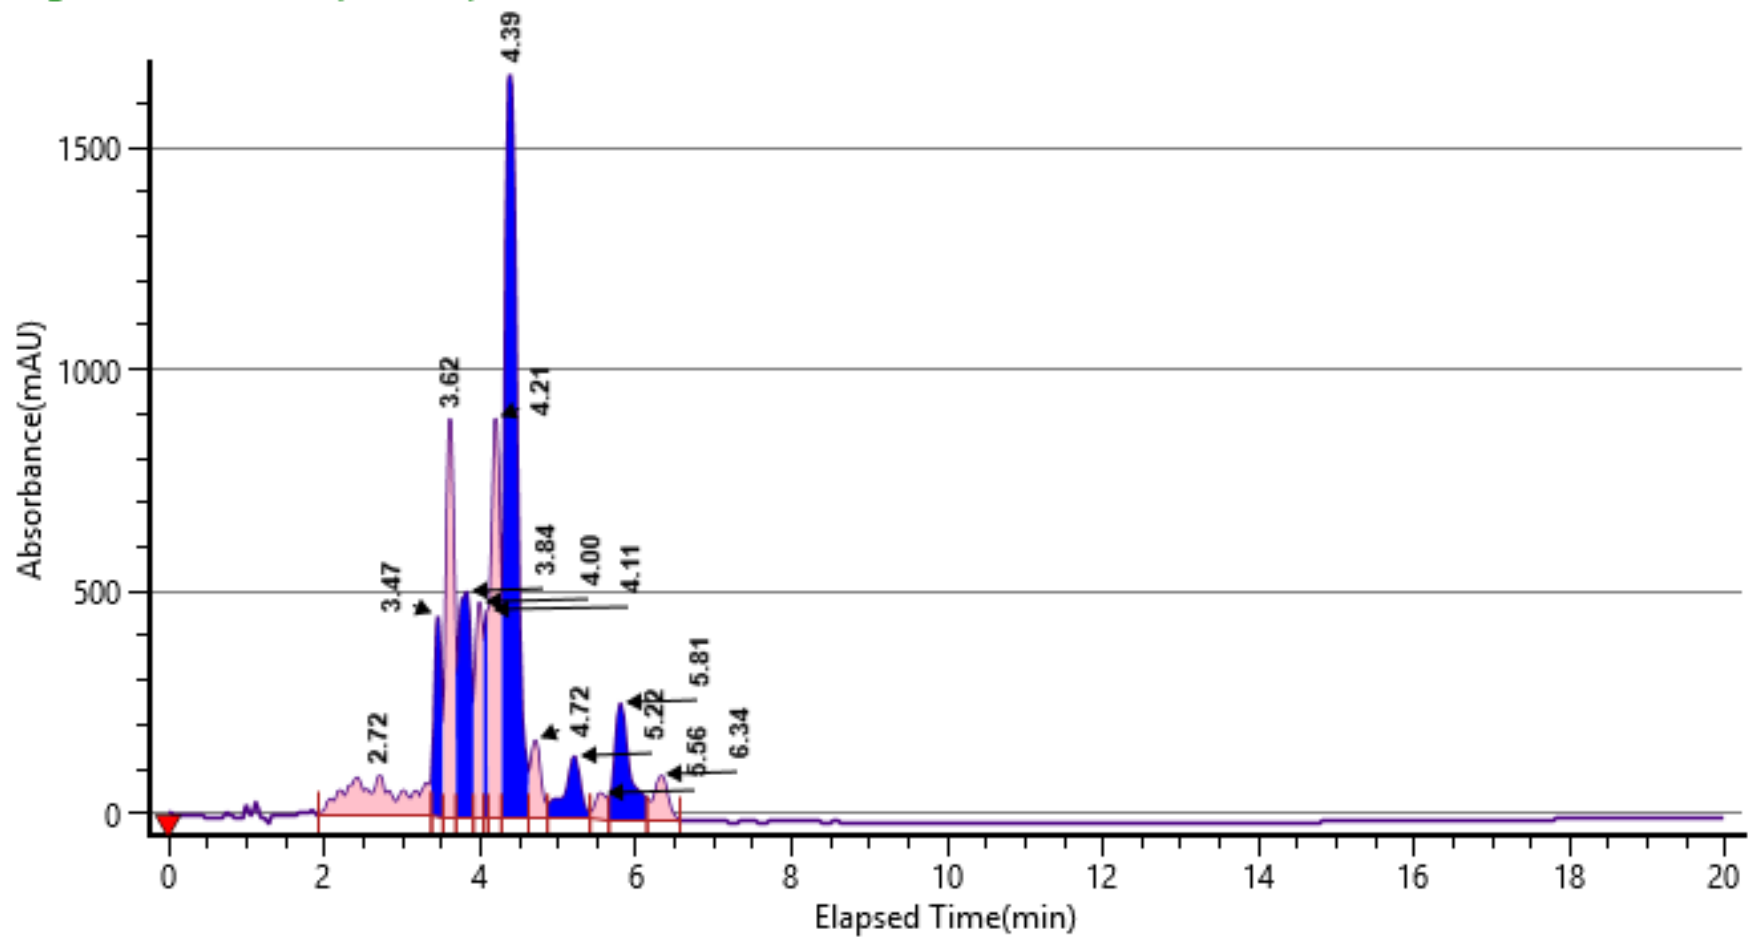

Column: LUX-Amylose-2

Single Absorbance (220nm) Plot

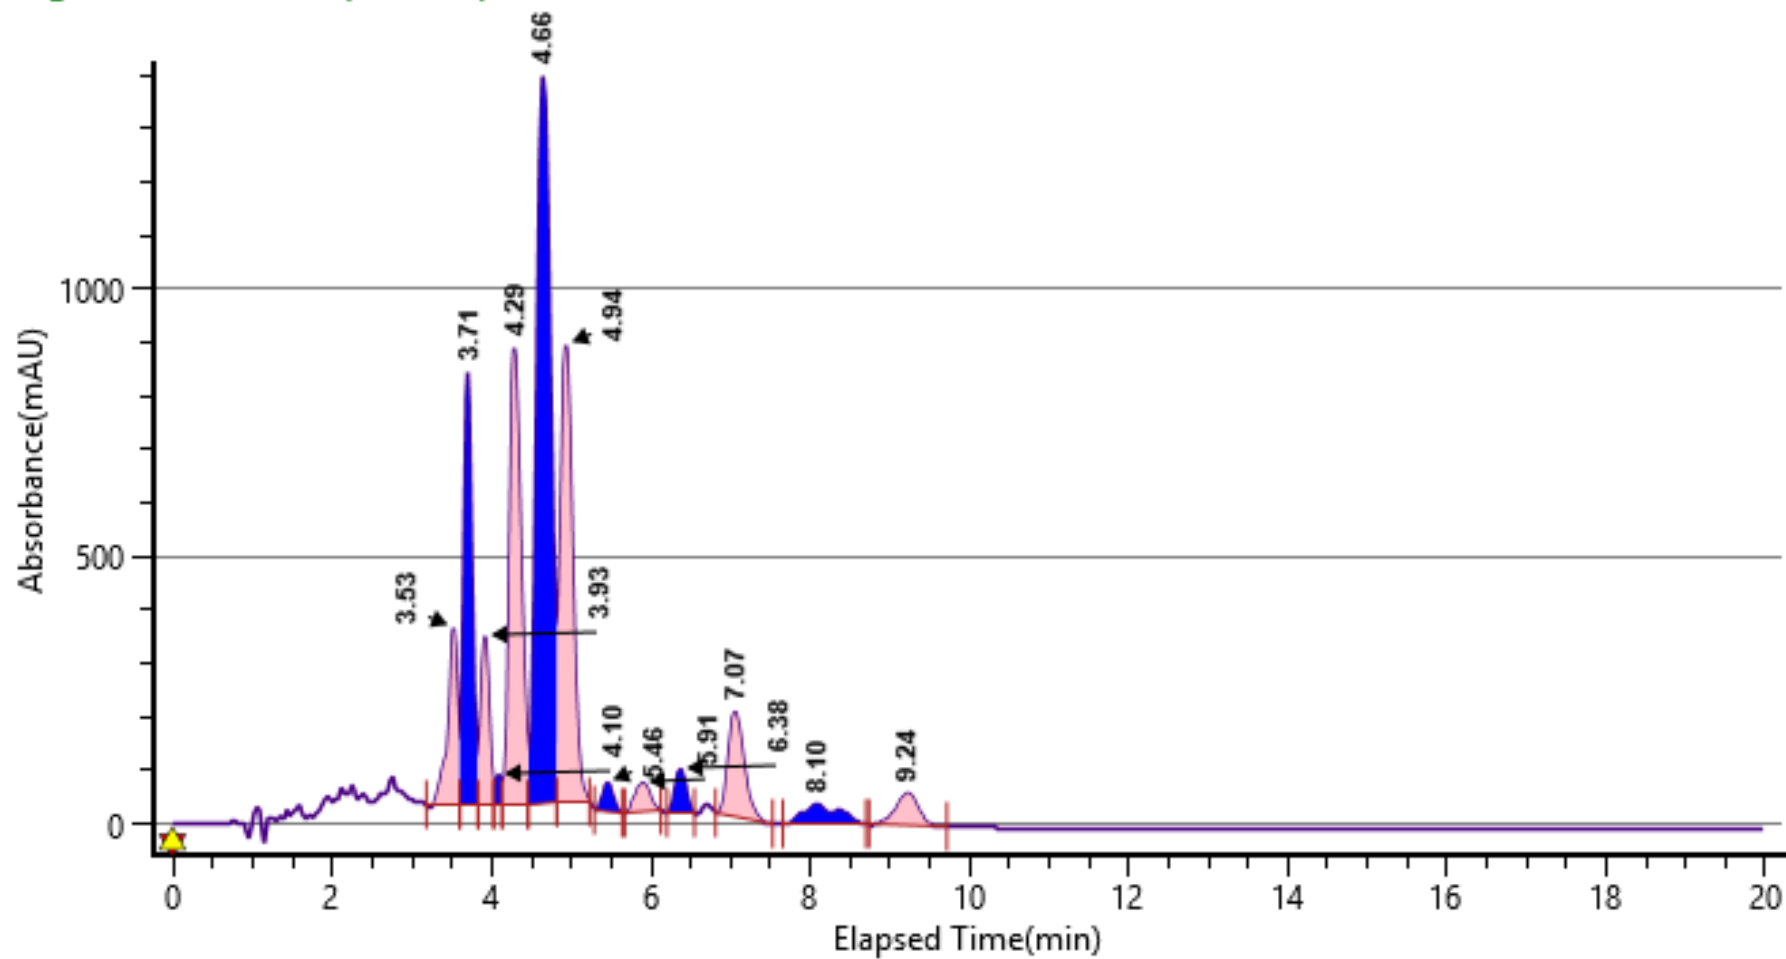

Column: Chiralpak-IG

Single Absorbance (220nm) Plot

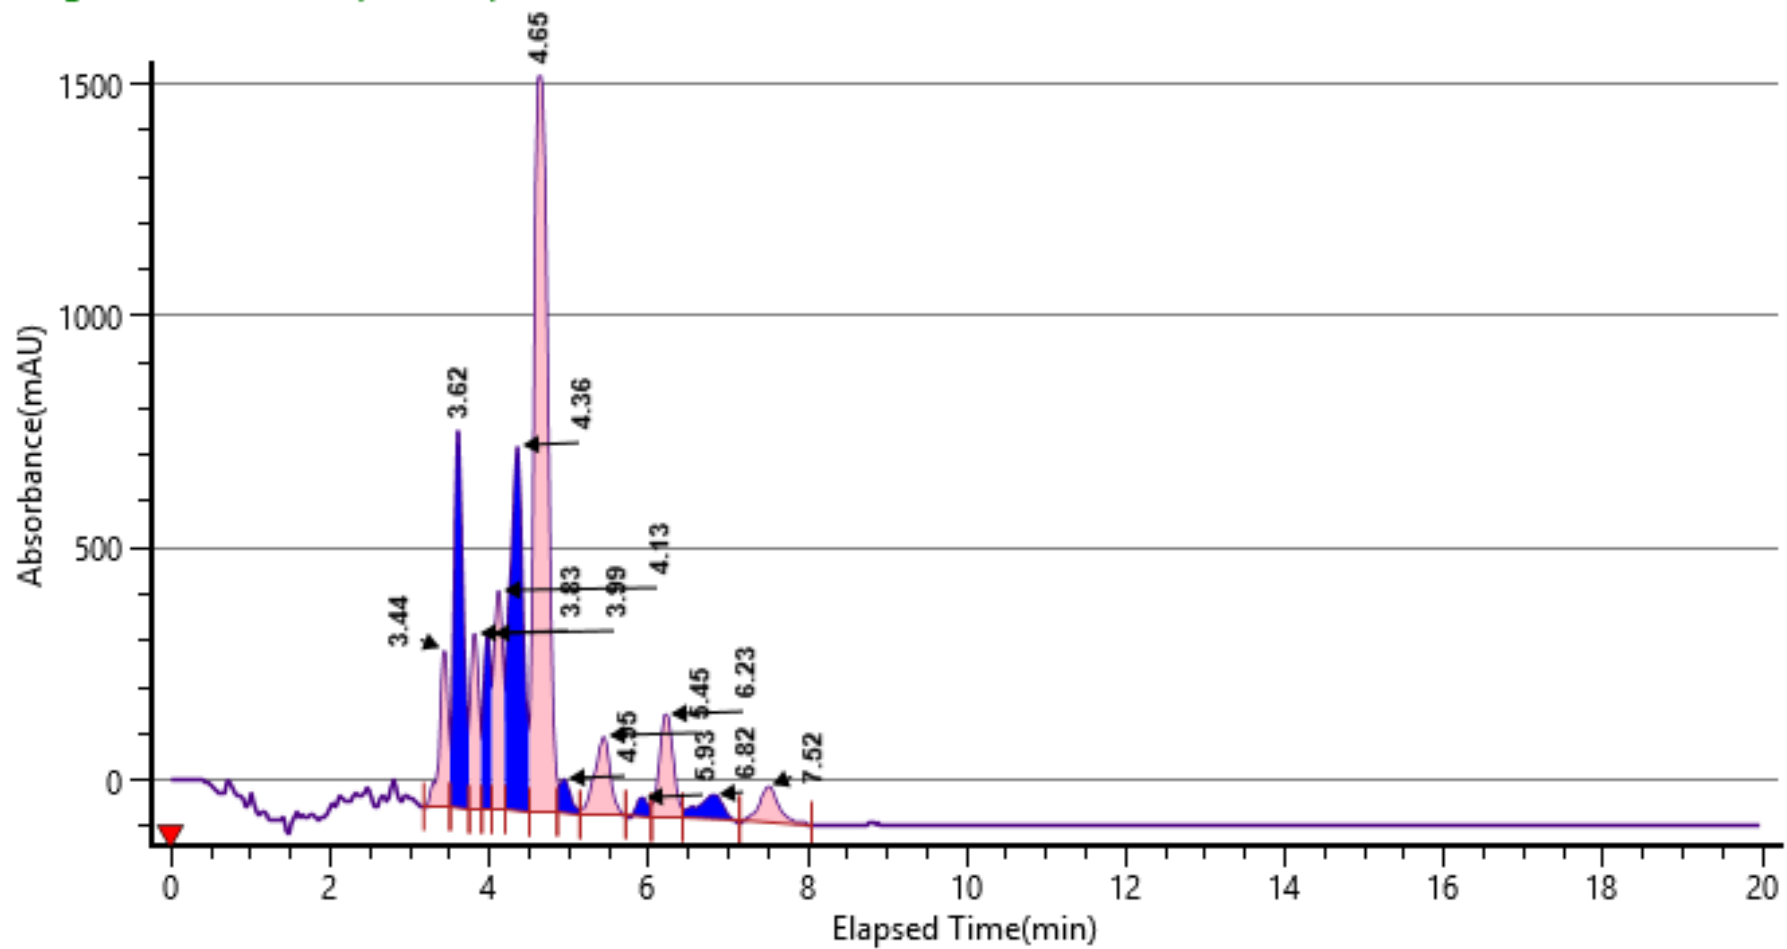

No elution with Chiral ART Amylose- SA and (R,R ) Whelk-O1 columns



Figure S2. Optimized SFC method for Acetone and ethanol extract of *Swietenia macrophylla* seed

**Acetone extract**

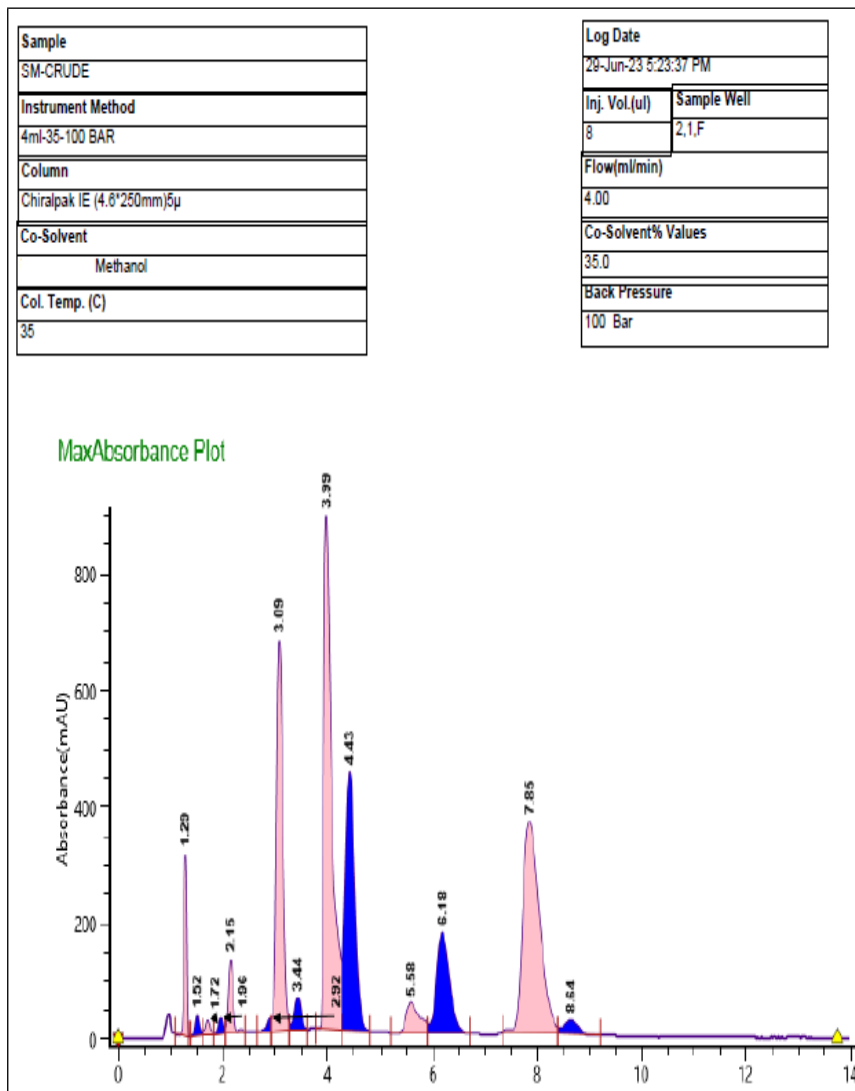

**Ethanol extract**

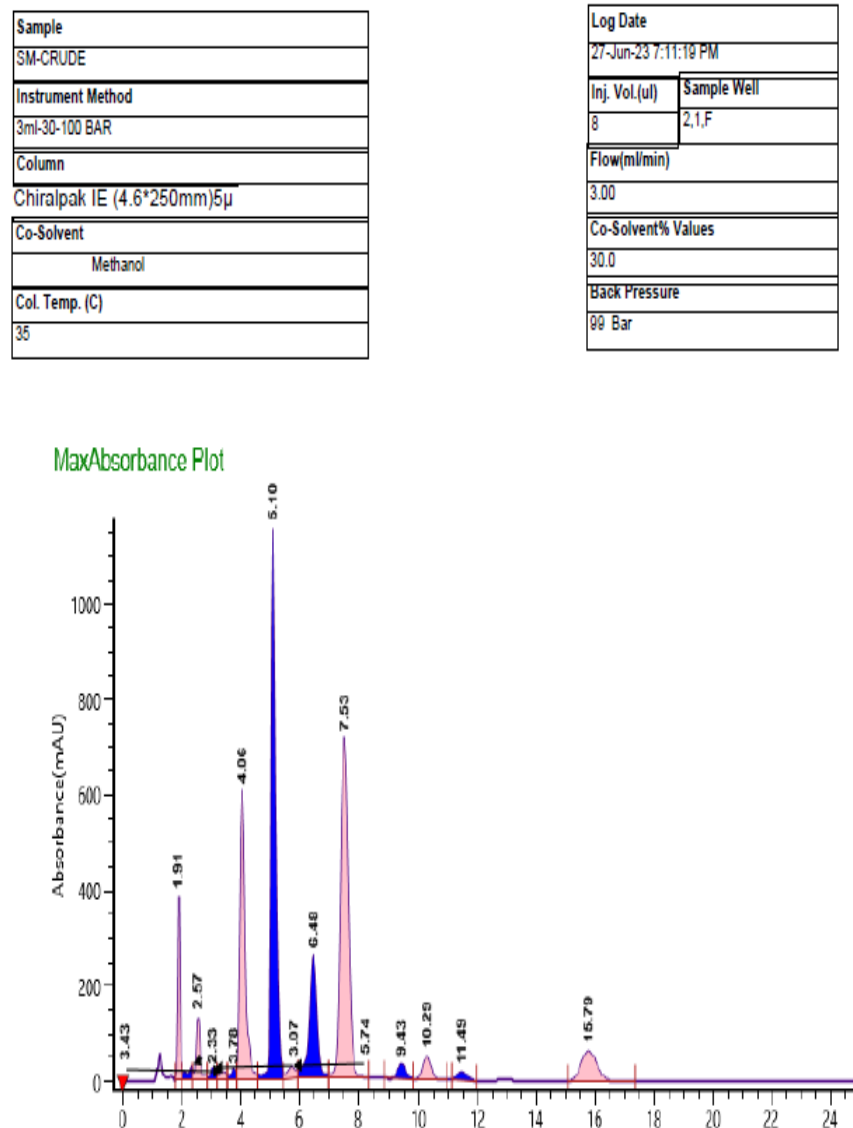

Figure S3. <sup>1</sup>H NMR Spectrum of compound **1** at (400 MHz) in DMSO-*d*<sub>6</sub>

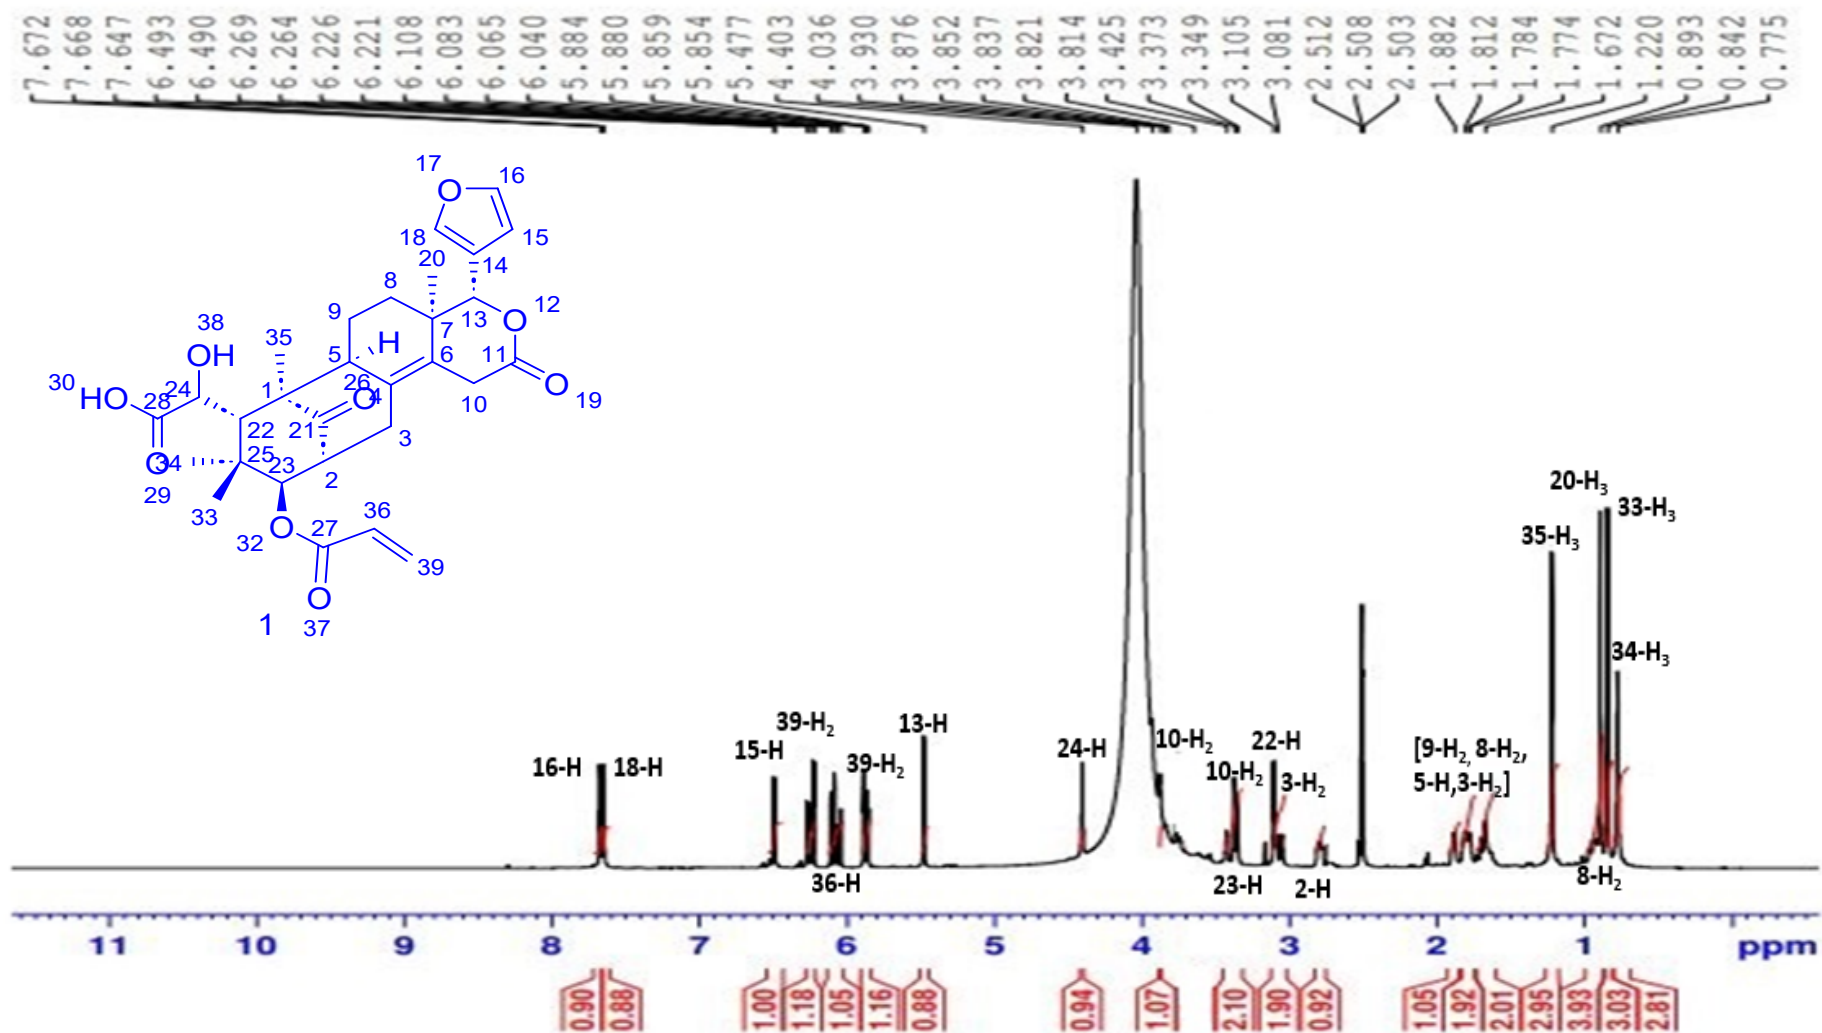

Figure S4.  $^{13}\text{C}$  NMR Spectrum of compound **1** at (400 MHz) in  $\text{DMSO-}d_6$

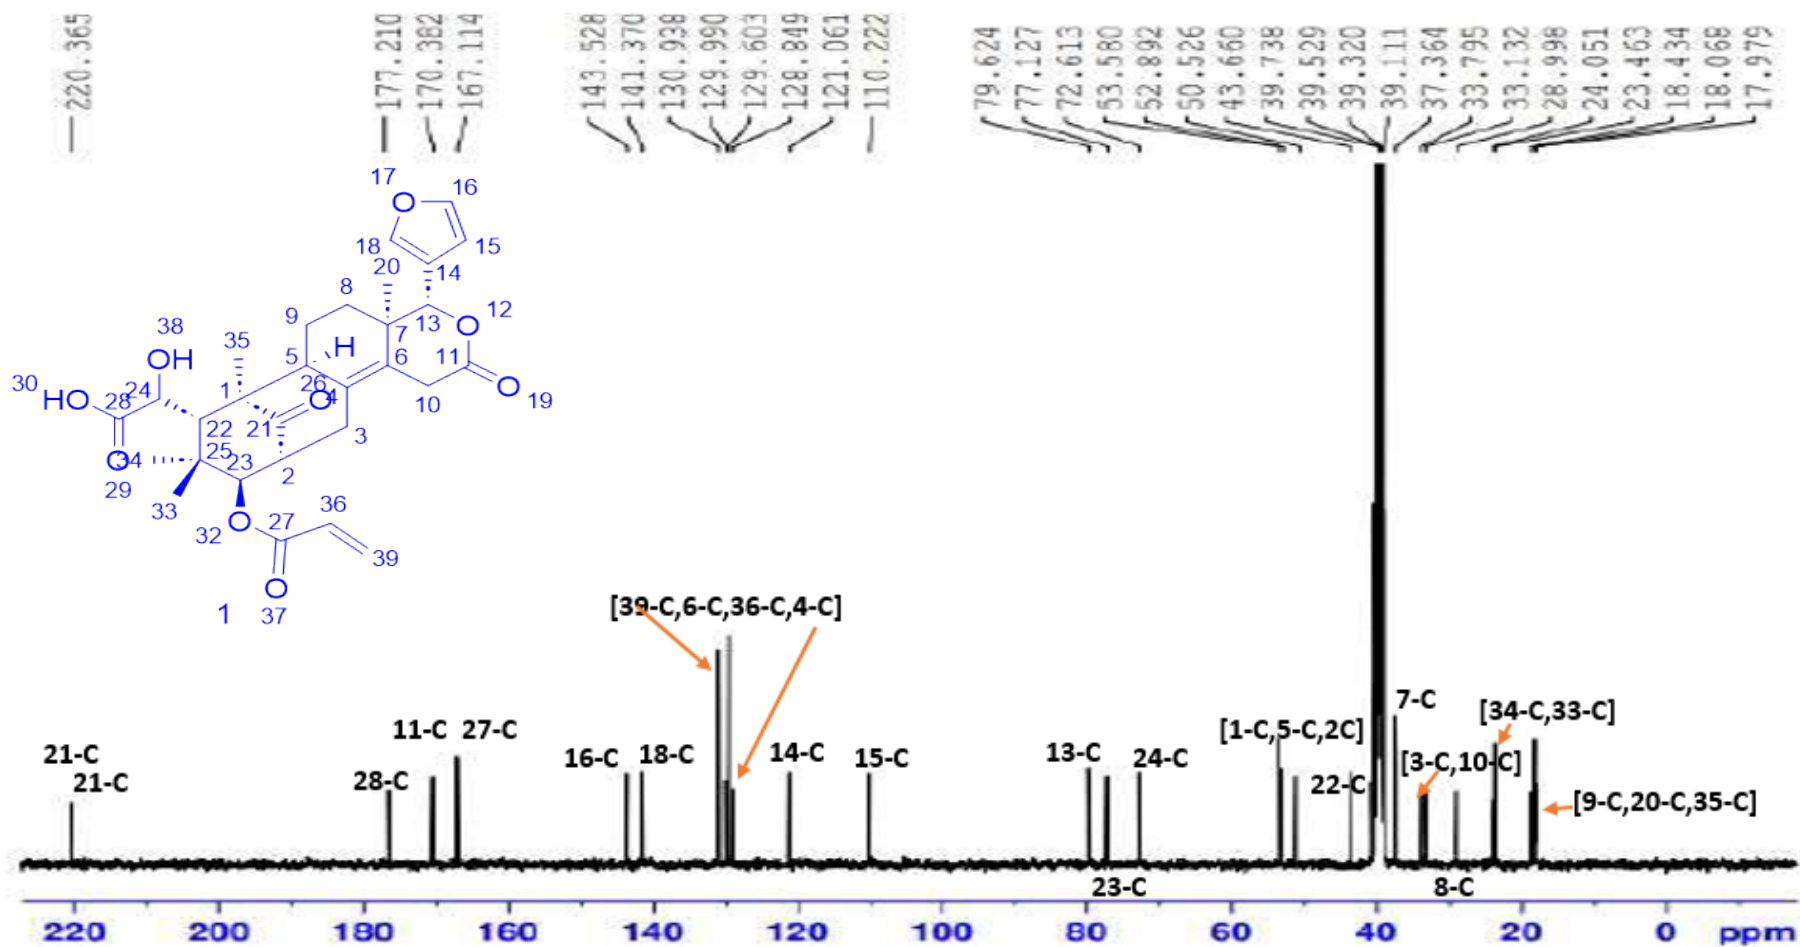

Figure S5. HSQC Spectrum of compound 1 at (400 MHz) in DMSO- *d*6

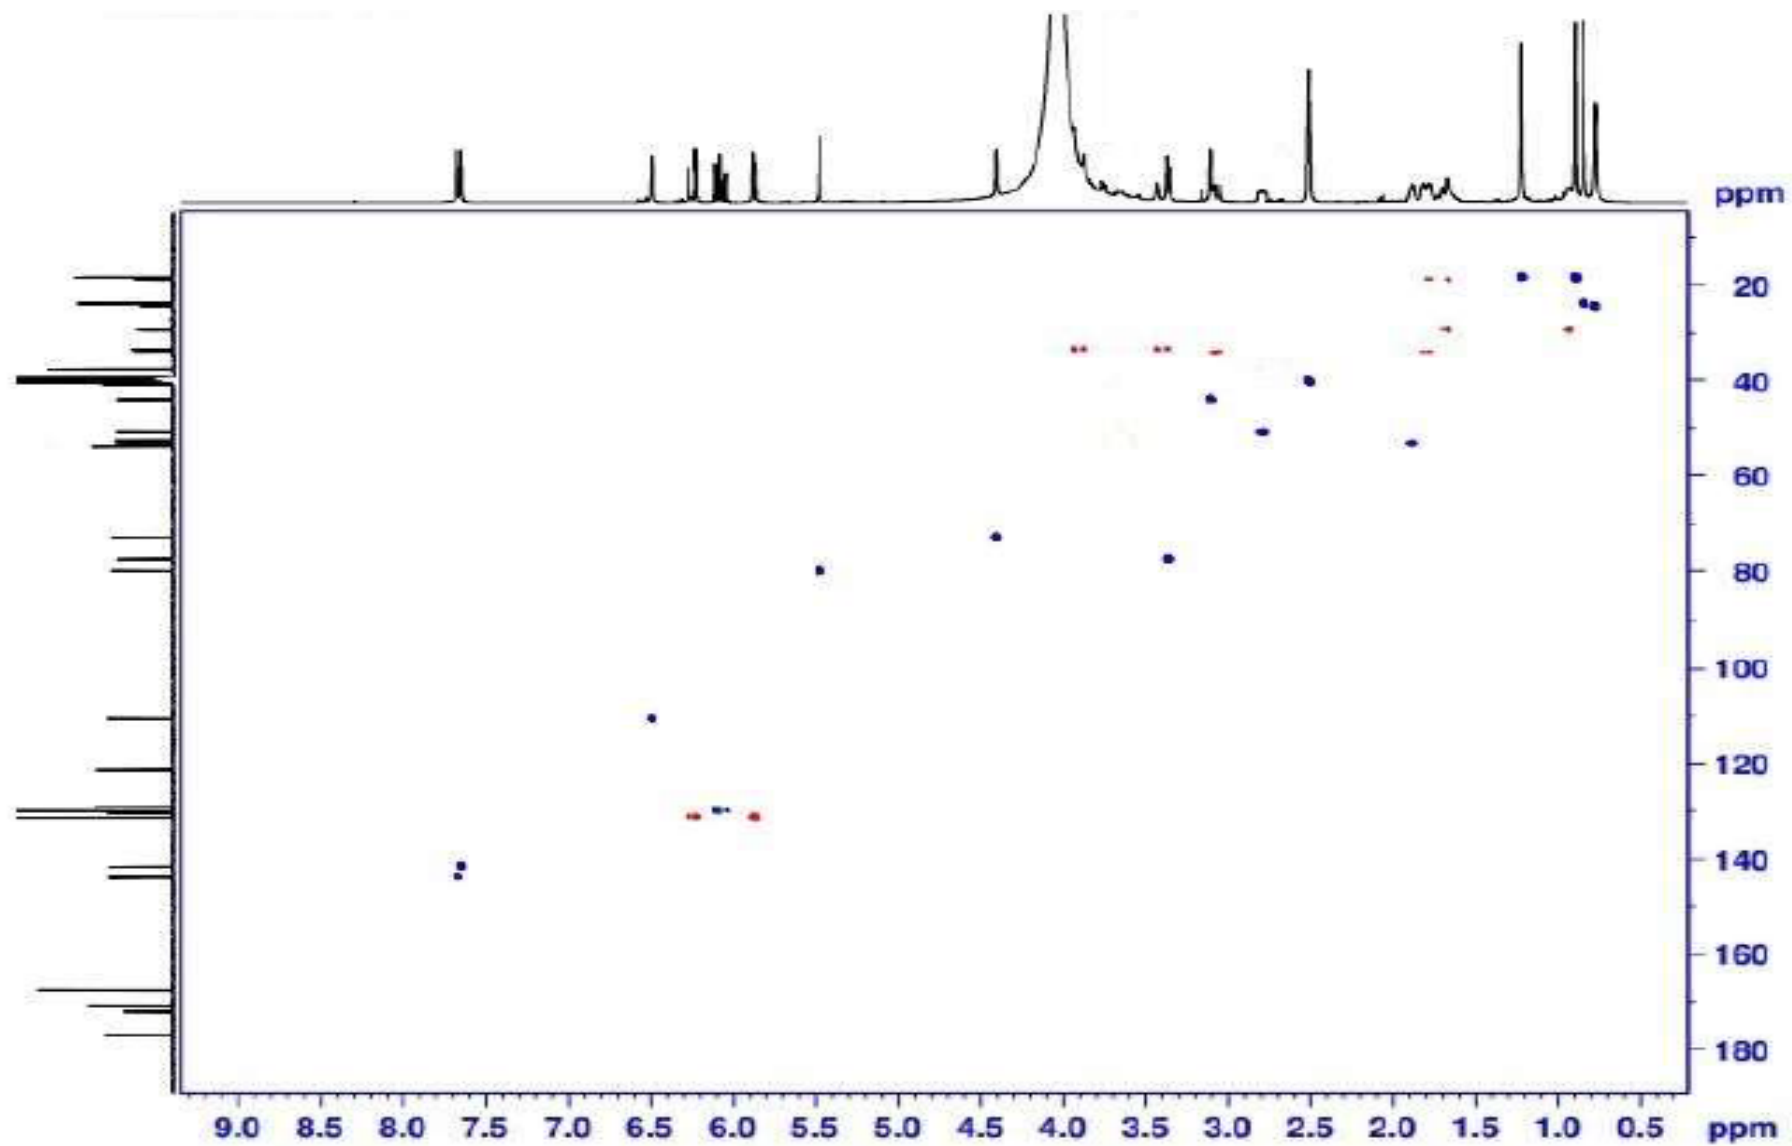



# Figure S7. HRESI mass spectrum of compound 1

Compound\_1#274-291 RT: 2.53-2.69 AV: 18 NL: 1.97E8  
T: FTMS - p ESI Full ms [100.0000-1500.0000]

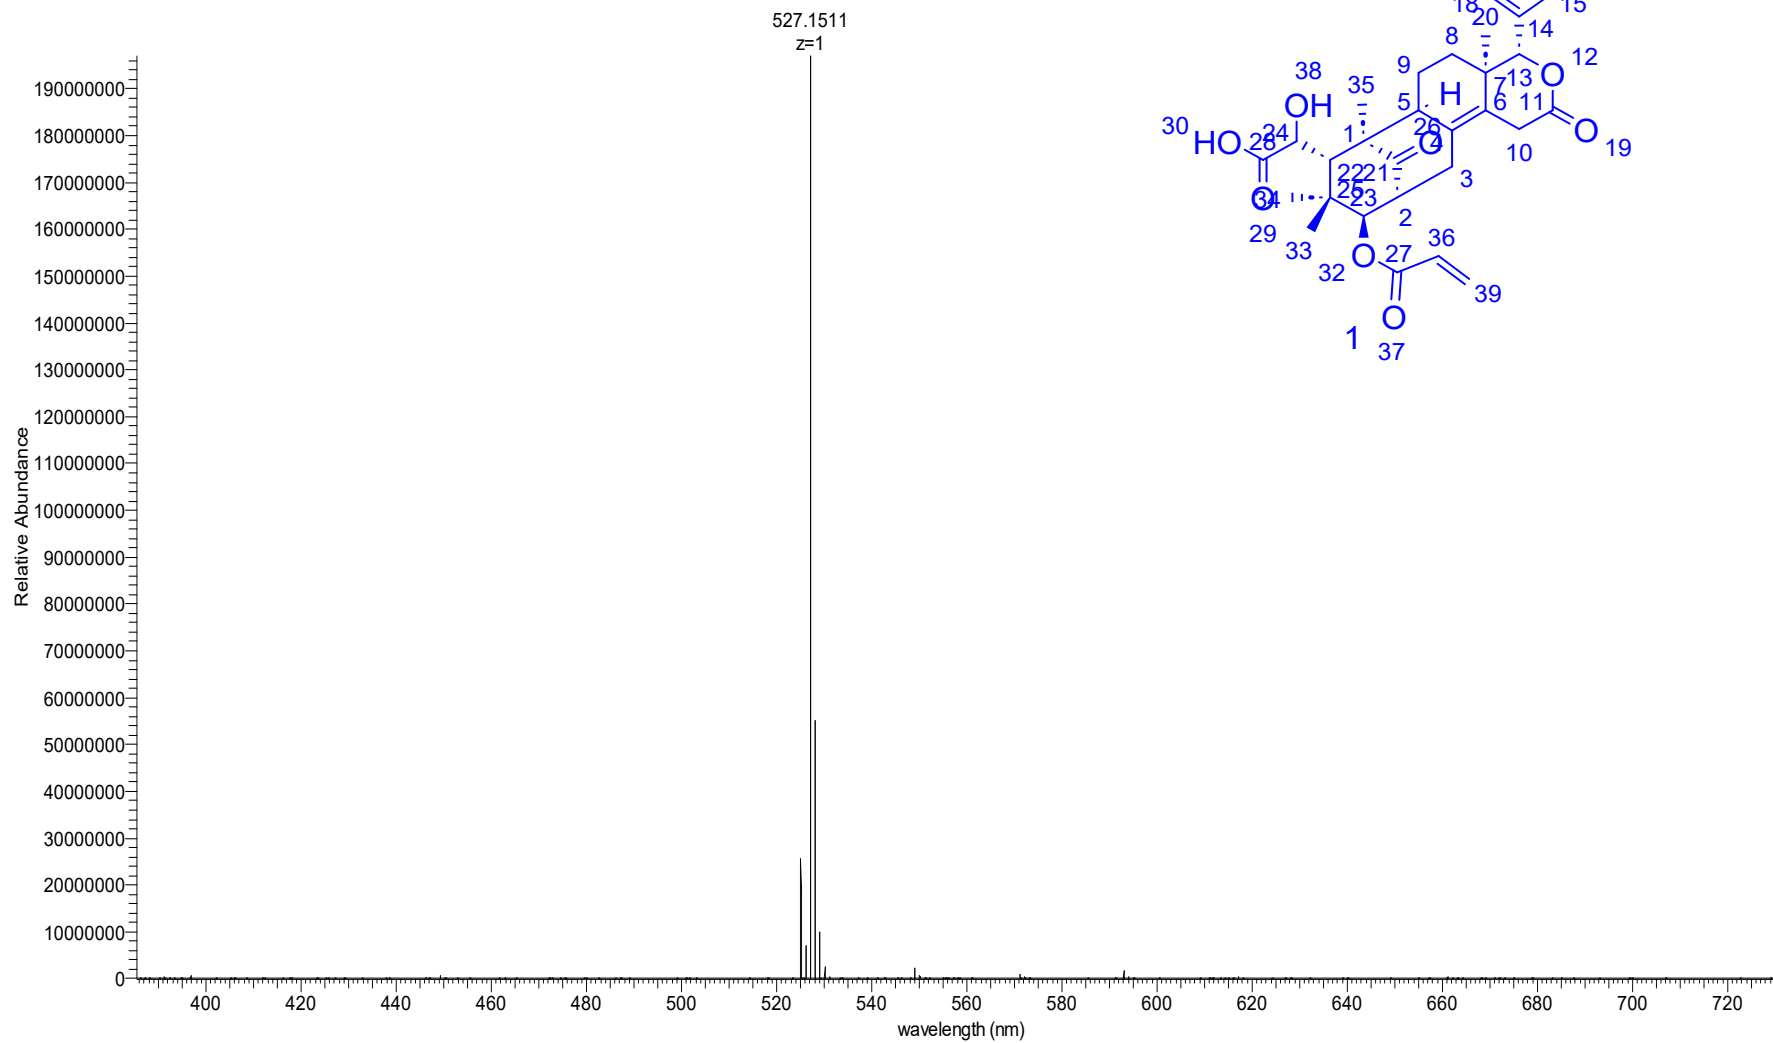

Figure S8. IR spectrum of compound 1

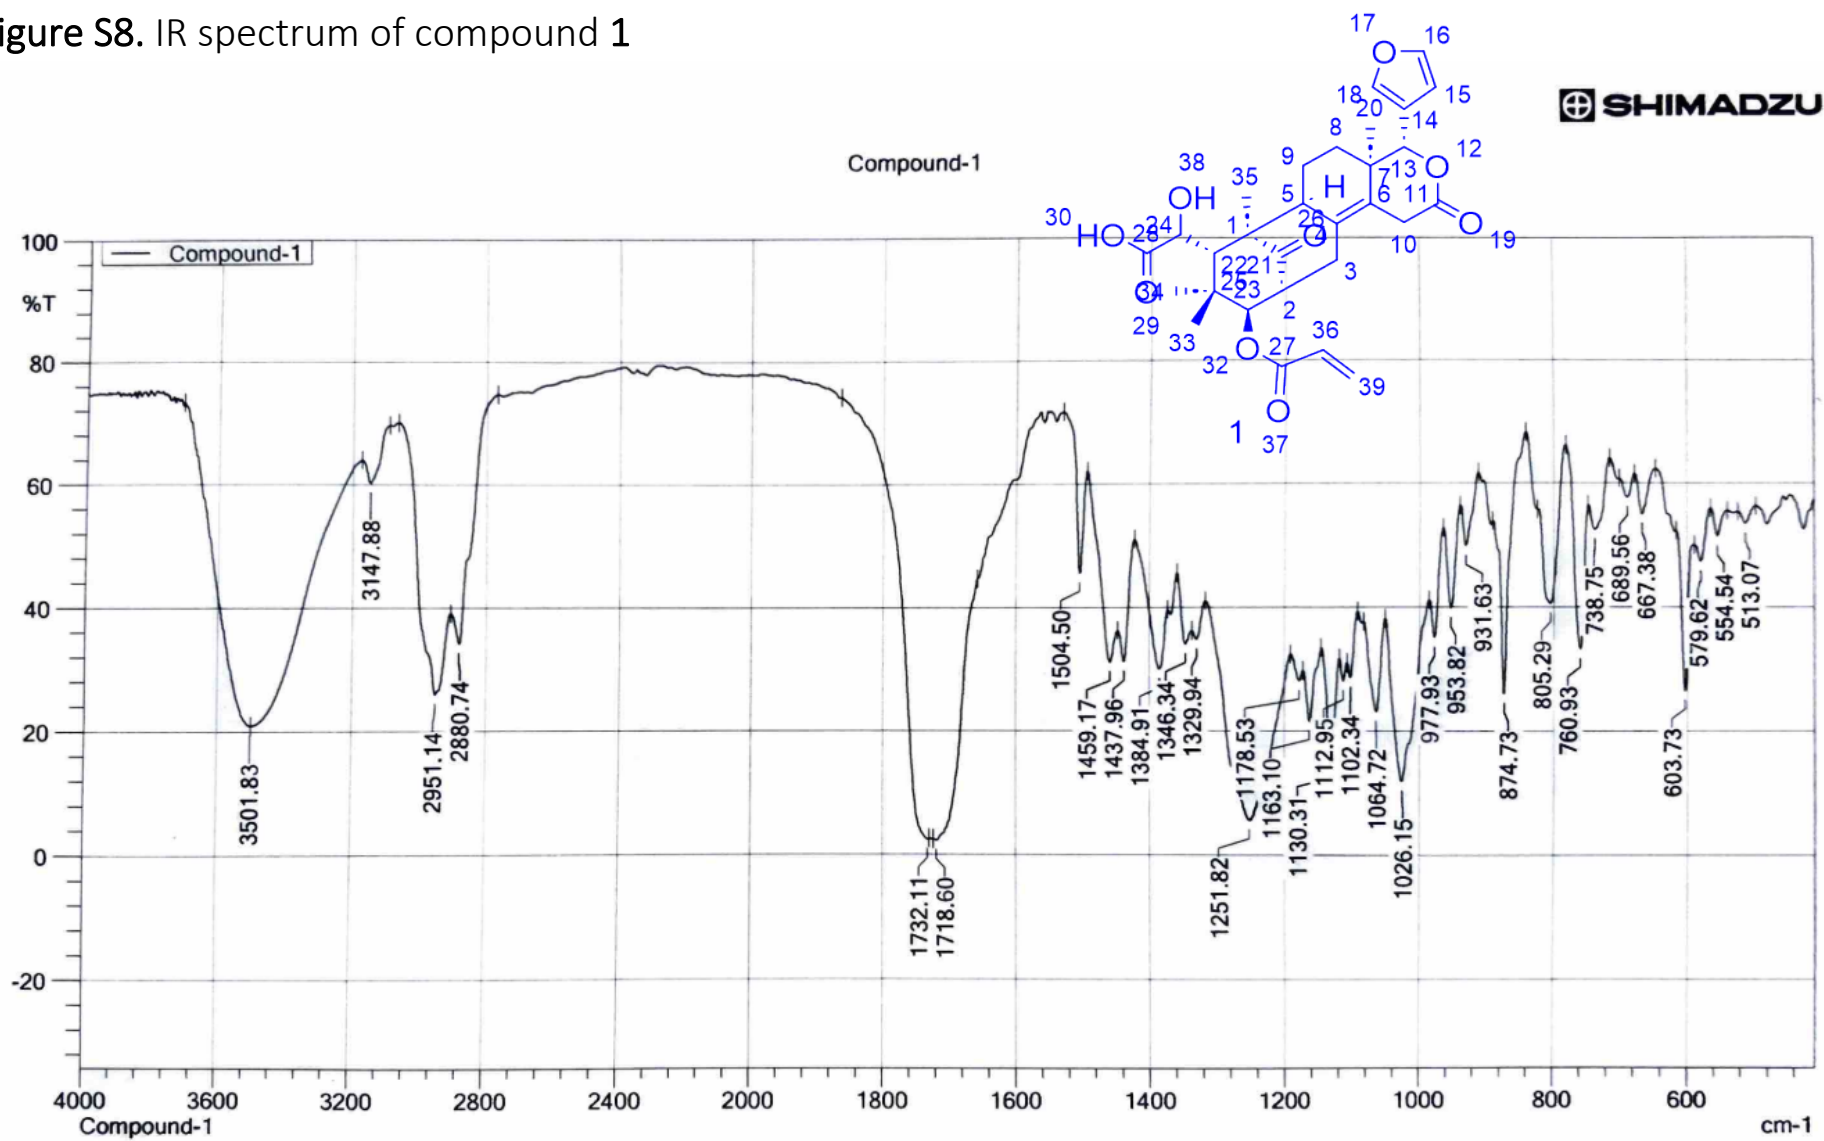

Figure S9. Optical rotation of compound 1

[Measurement Information]

Instrument Name Polarimeter  
 Model Name P-2000  
 Serial No. B209561232  
 Polarizer Dichrom  
 Faraday Cell Flint Glass

Accessory PTC-262  
 Accessory S/N C051961481  
 Temperature 25.00 C  
 Control Sensor Holder  
 Monitor Sensor Holder  
 Start Mode Keep target temperature +/-0.10 C while 5 seconds

Light Source WI  
 Monitor wavelength 589 nm  
 D.I.T. 5 sec  
 No. of cycle 5  
 Cycle interval 5 sec  
 Temp. Monitor Holder  
 Temp. Corr. Factor 0 at 20 C  
 Aperture(S) 8.0mm  
 Aperture(L) Auto  
 Mode Specific O.R.  
 Path Length 10 mm  
 Concentration 0.1 w/v%  
 Water content of sample 0 %  
 Factor 1

Comment  
 Username  
 Division  
 Organization

0.1% in Methanol

Aragen Life Sciences Pvt Ltd

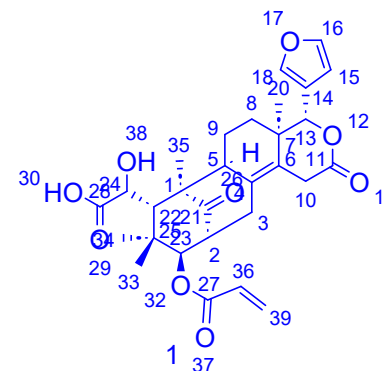

|   | No. | Sample No. | Calc. Data   | Meas. Data | Temperature(C) | Blank | Comment |                  |
|---|-----|------------|--------------|------------|----------------|-------|---------|------------------|
| 1 | *   | 1          | Compound-1-1 | -180.2000  | -0.0180        | 24.99 | +0.0064 | 0.1% in Methanol |
| 2 | *   | 2          | Compound-1-2 | -181.2000  | -0.0181        | 24.99 | +0.0064 | 0.1% in Methanol |
| 3 | *   | 3          | Compound-1-3 | -181.2000  | -0.0181        | 25.00 | +0.0064 | 0.1% in Methanol |
| 4 | *   | 4          | Compound-1-4 | -181.2000  | -0.0181        | 25.00 | +0.0064 | 0.1% in Methanol |
| 5 | *   | 5          | Compound-1-5 | -180.2000  | -0.0180        | 25.01 | +0.0064 | 0.1% in Methanol |
| 6 | *   | 6          | Avg.         | -180.8000  |                |       |         |                  |
| 7 |     | 7          | S.D          | 0.5477     |                |       |         |                  |
| 8 |     | 8          | C.V          | 0.3029     |                |       |         |                  |



Figure S10. UV Spectra of compound 1

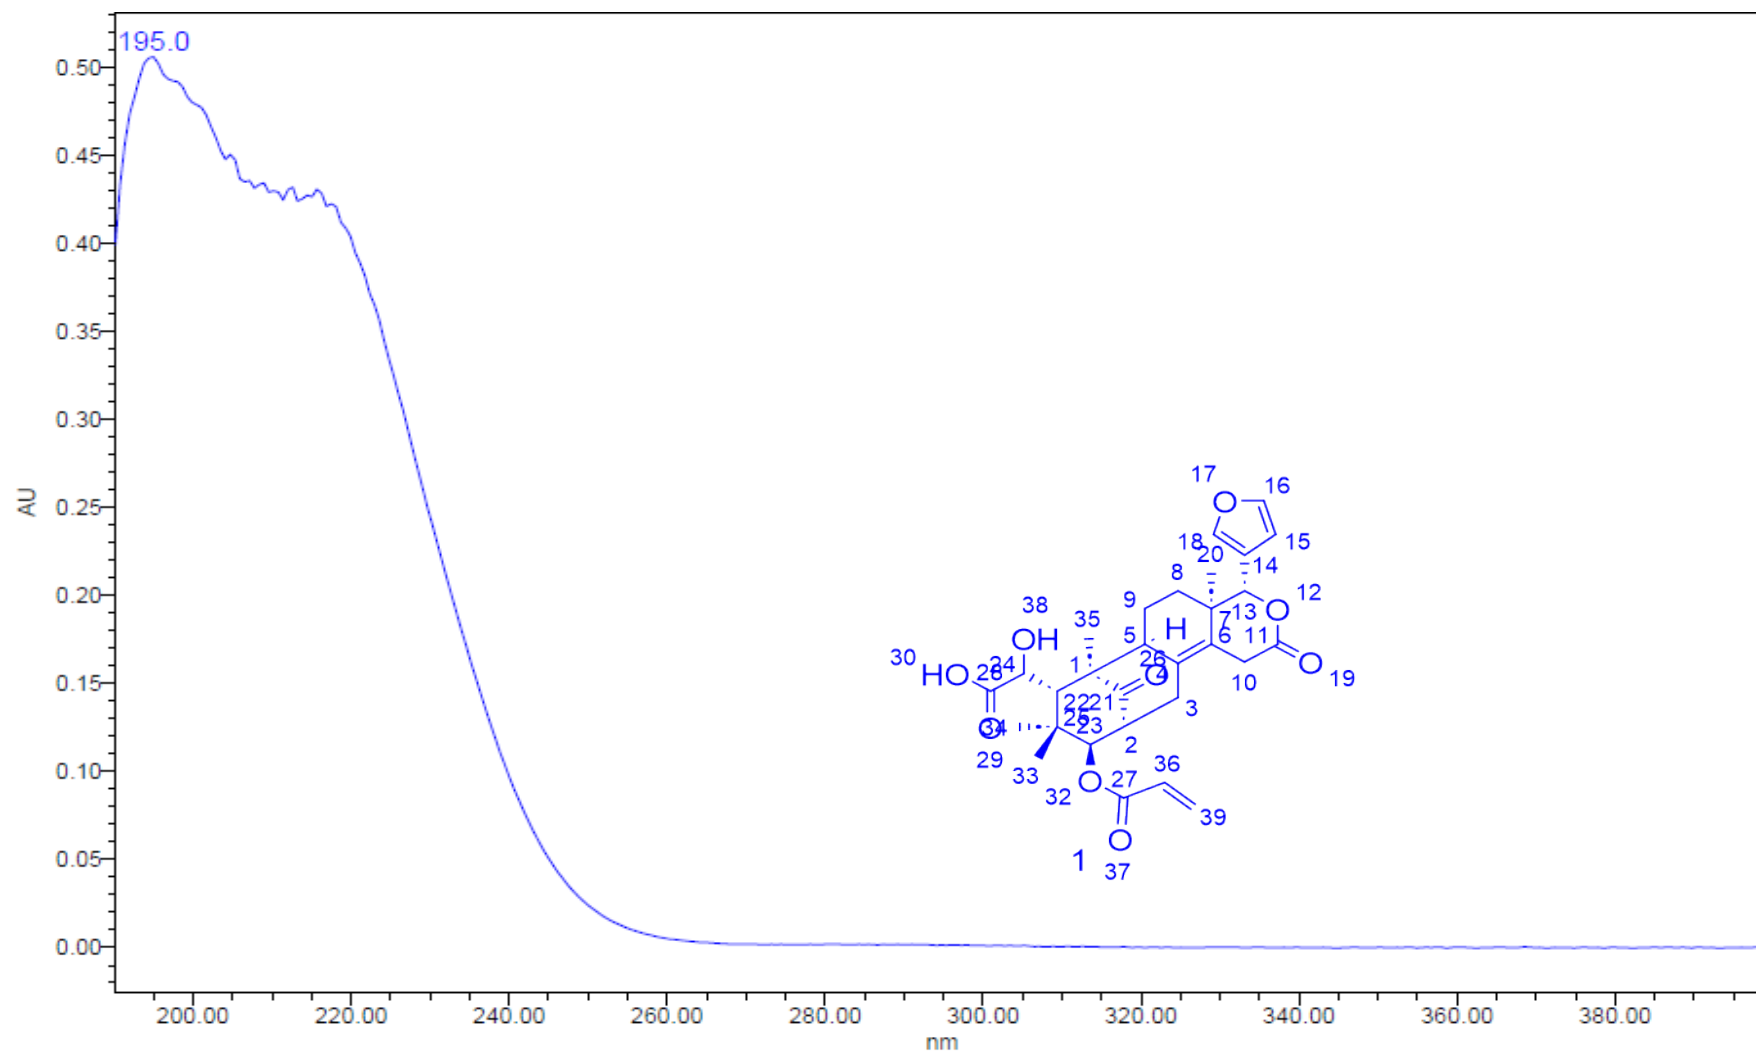

Figure S11.  $^1\text{H}$  NMR Spectrum of compound 2 at (400 MHz) in  $\text{DMSO-}d_6$

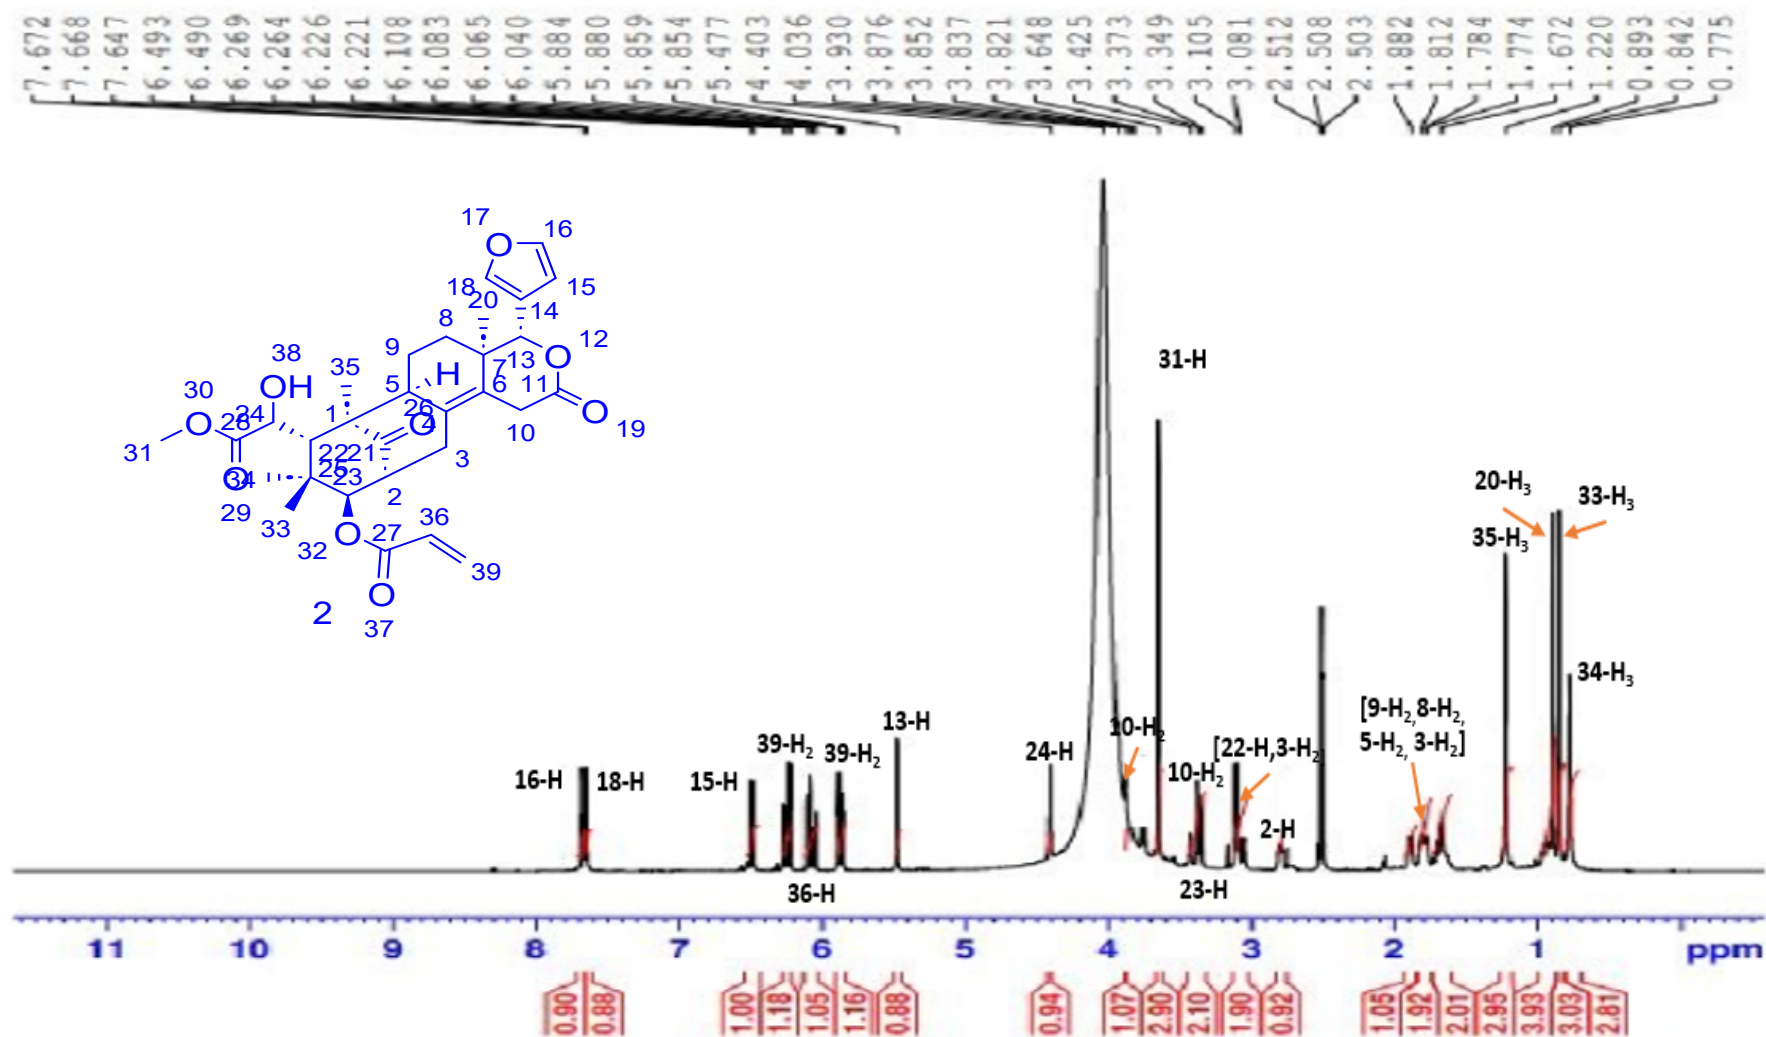

Figure S12.  $^{13}\text{C}$  NMR Spectrum of compound 2 at (400 MHz) in  $\text{DMSO-}d_6$

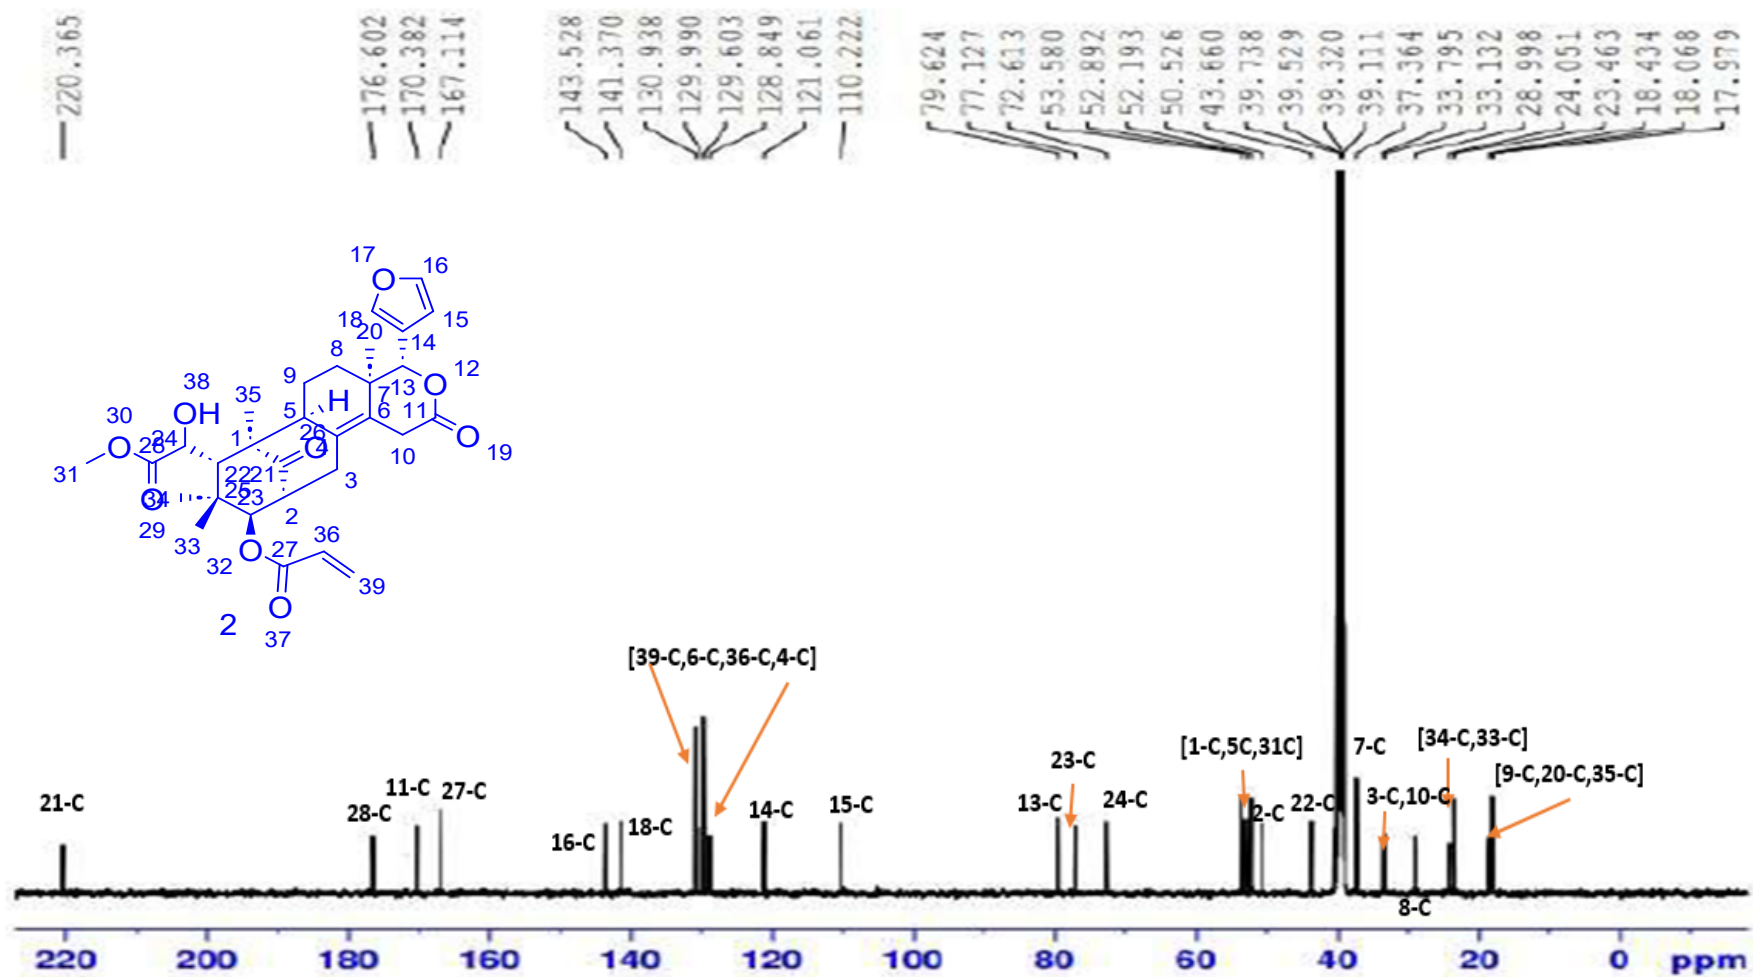

Figure S13. HSQC Spectrum of compound 2 in DMSO-*d*<sub>6</sub>

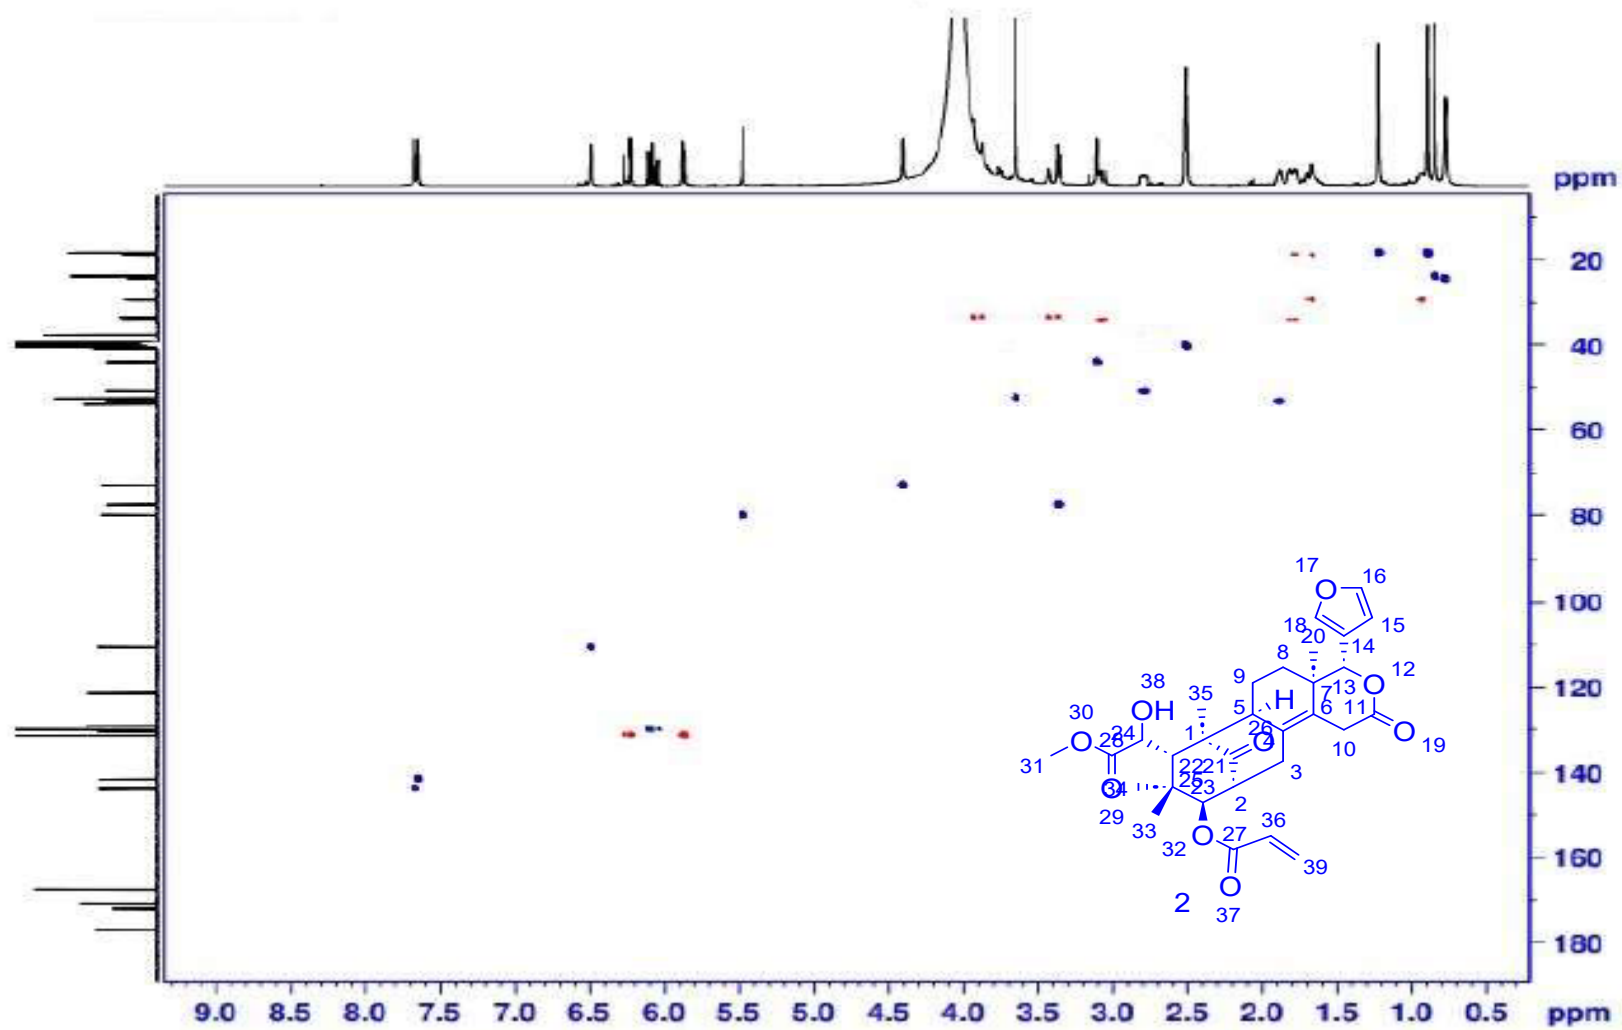

Figure S14. HMBC Spectrum of compound 2 in DMSO-*d*6

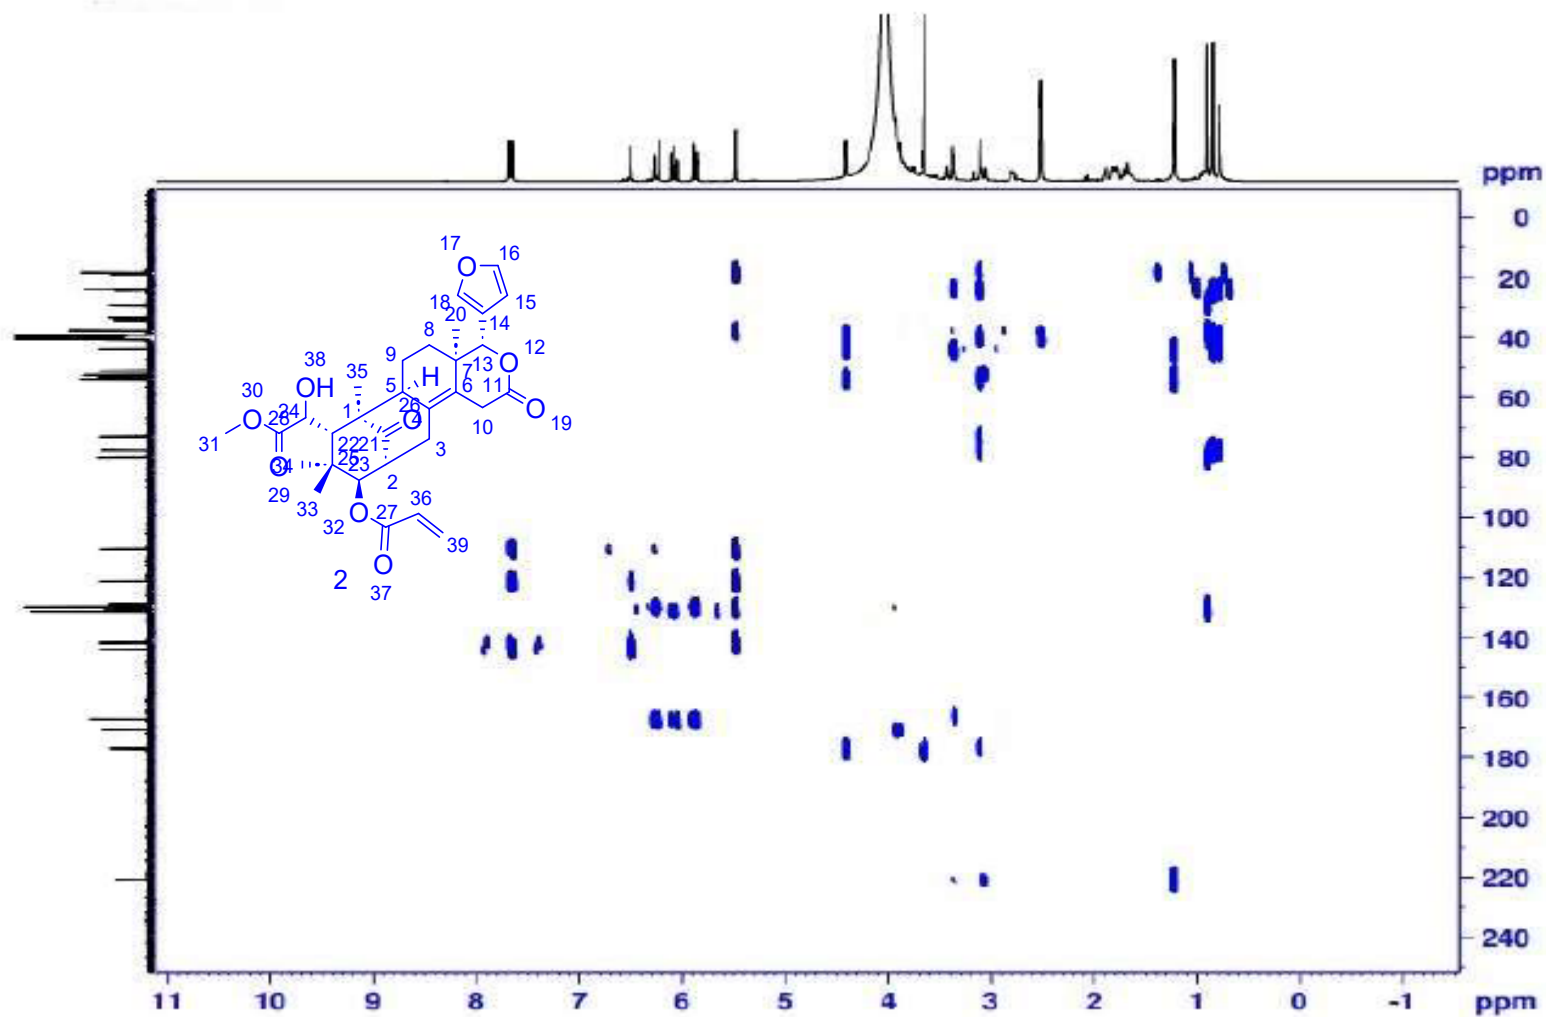

Figure S15. HRESI Mass spectrum of compound 2

TNB\_A800S #235-247 RT: 2.23-2.34 AV: 13 NL: 3.85E8  
T: FTMS + p ESI Full ms [100.0000-1500.0000]

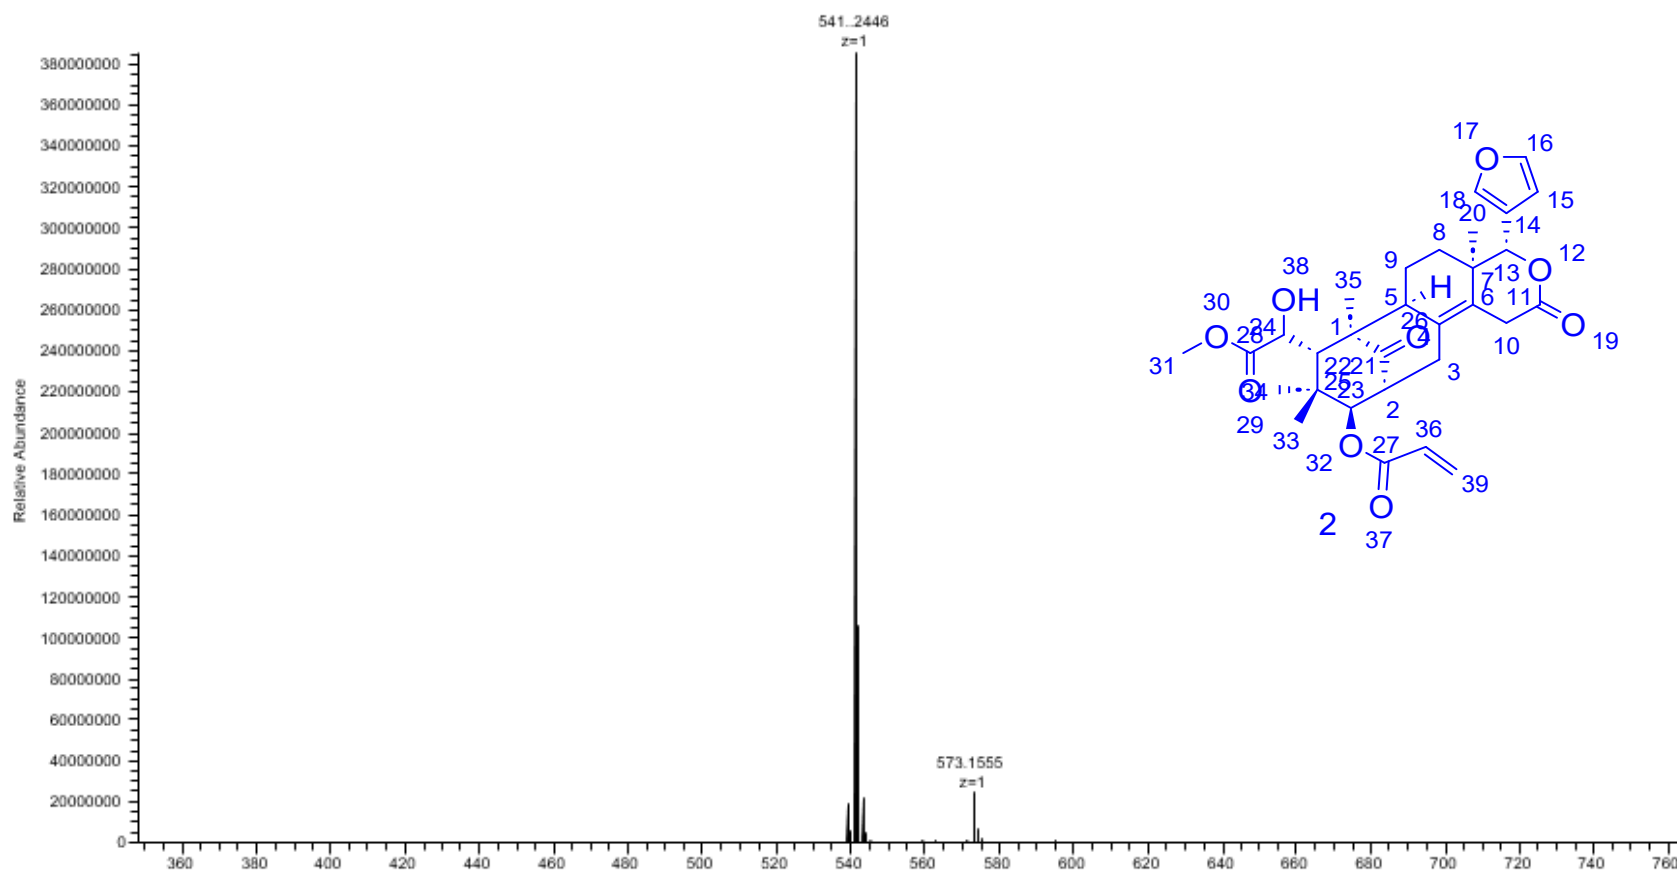

Figure S16. IR spectrum of compound 2

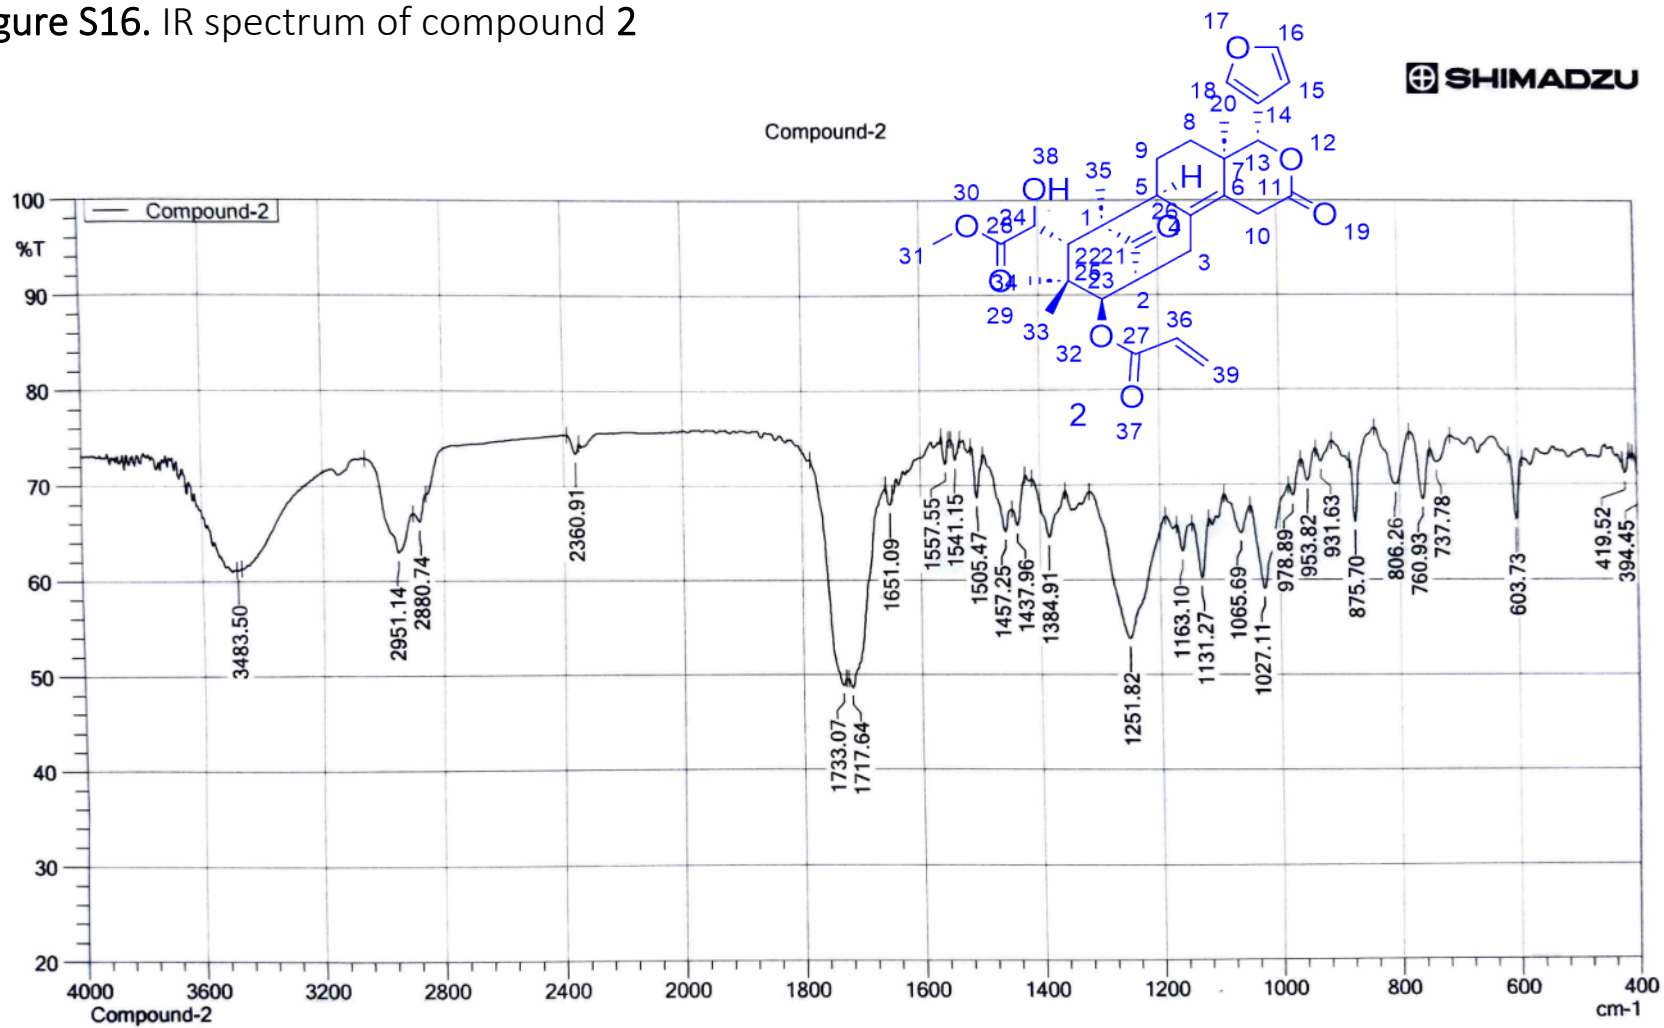

Figure S17. Optical rotation of compound 2

[Measurement Information]

Instrument Name Polarimeter  
 Model Name P-2000  
 Serial No. B209561232  
 Polarizer Dichrom  
 Faraday Cell Flint Glass

Accessory PTC-262  
 Accessory S/N C051961481  
 Temperature 25.00 C  
 Control Sensor Holder  
 Monitor Sensor Holder  
 Start Mode Keep target temperature +/-0.10 C while 5

seconds  
 Light Source WI  
 Monitor wavelength 589 nm  
 D.I.T. 5 sec  
 No. of cycle 5  
 Cycle interval 5 sec  
 Temp. Monitor Holder  
 Temp. Corr. Factor 0 at 20 C  
 Aperture(S) 8.0mm  
 Aperture(L) Auto  
 Mode Specific O.R.  
 Path Length 10 mm  
 Concentration 0.1 w/v%  
 Water content of sample 0 %  
 Factor 1

Comment 0.1% in Methanol  
 Username  
 Division  
 Organization Aragen Life Sciences Pvt Ltd

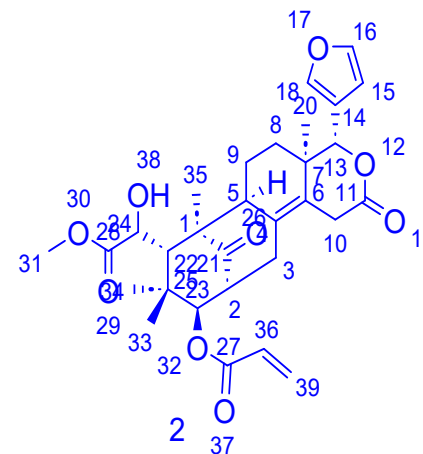

|   | No. | Sample No. | Calc. Data   | Meas. Data | Temperature(C) | Blank | Comment |                  |
|---|-----|------------|--------------|------------|----------------|-------|---------|------------------|
| 1 | *   | 1          | Compound-2-1 | -122.2000  | -0.0122        | 25.01 | +0.0064 | 0.1% in Methanol |
| 2 | *   | 2          | Compound-2-2 | -117.2000  | -0.0117        | 25.01 | +0.0064 | 0.1% in Methanol |
| 3 | *   | 3          | Compound-2-3 | -121.2000  | -0.0121        | 25.00 | +0.0064 | 0.1% in Methanol |
| 4 | *   | 4          | Compound-2-4 | -116.2000  | -0.0116        | 25.00 | +0.0064 | 0.1% in Methanol |
| 5 | *   | 5          | Compound-2-5 | -120.2000  | -0.0120        | 24.99 | +0.0064 | 0.1% in Methanol |
| 6 | *   | 6          | Avg.         | -119.4000  |                |       |         |                  |
| 7 |     | 7          | S.D          | 2.5884     |                |       |         |                  |
| 8 |     | 8          | C.V          | 2.1679     |                |       |         |                  |



Figure S18. UV spectra of compound 2

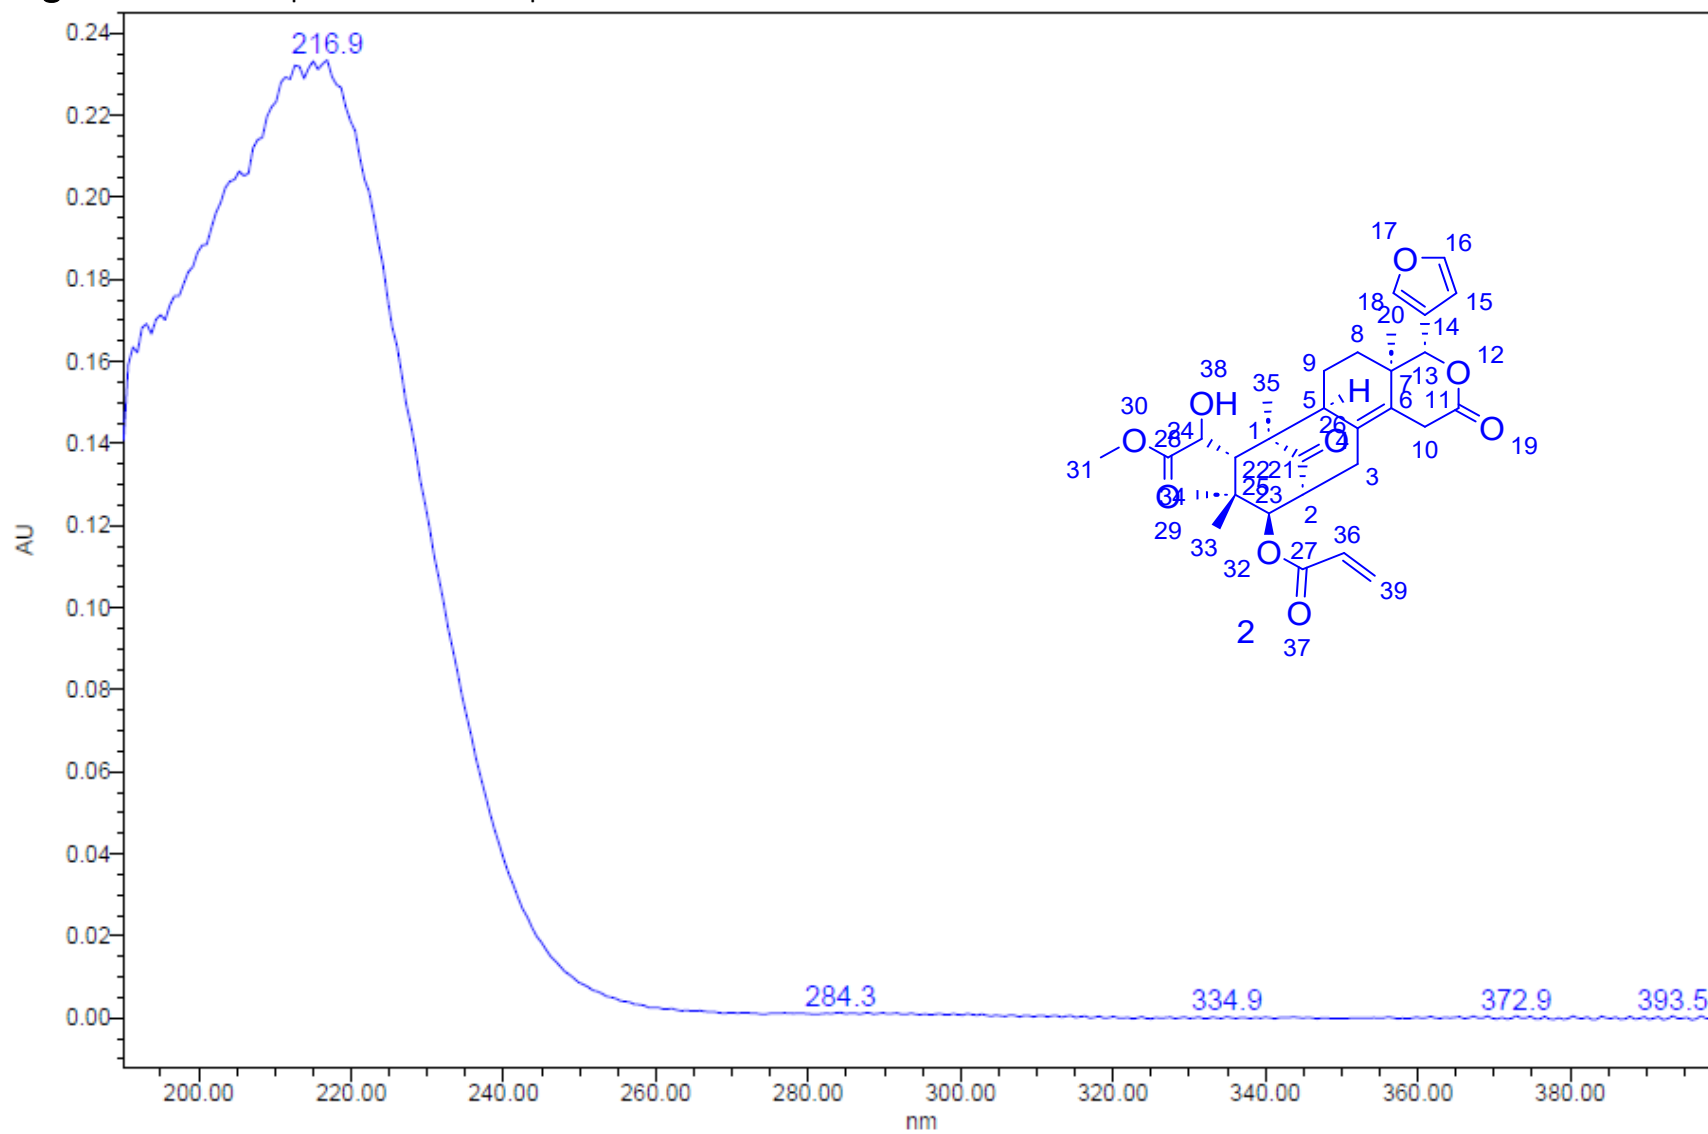

Figure S19.  $^1\text{H}$  NMR Spectrum of compound **3** at (400 MHz) in  $\text{DMSO-}d_6$

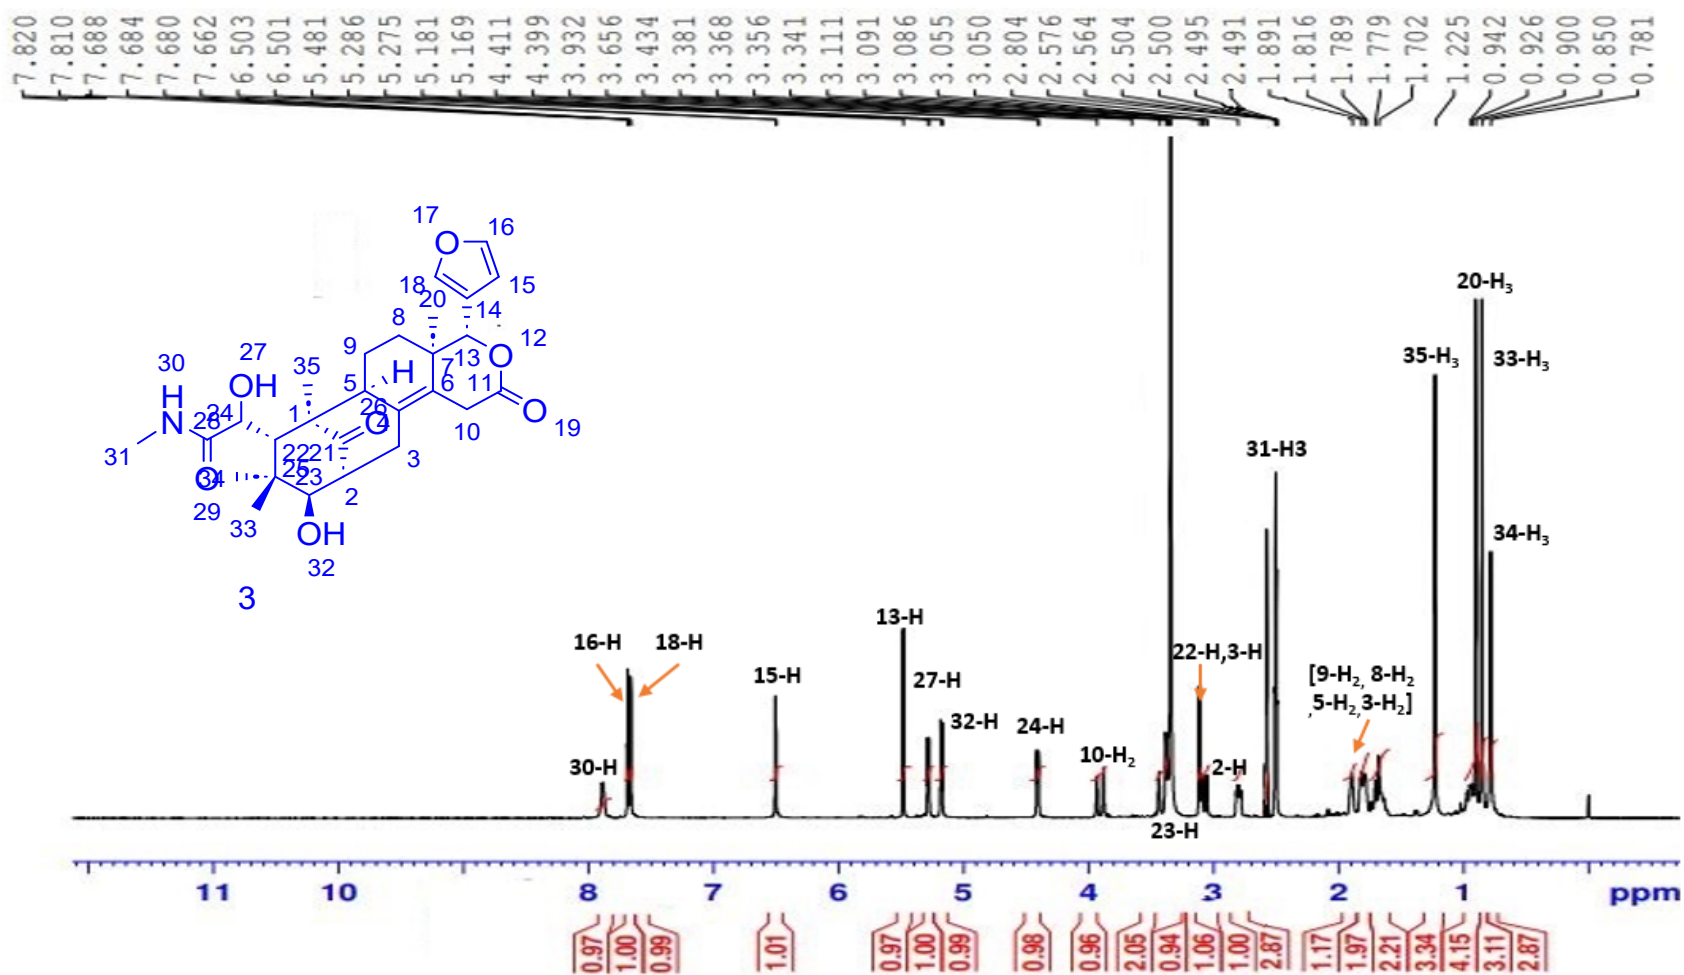

Figure S20.  $^{13}\text{C}$  NMR Spectrum of compound **3** at (400 MHz) in DMSO- $d_6$

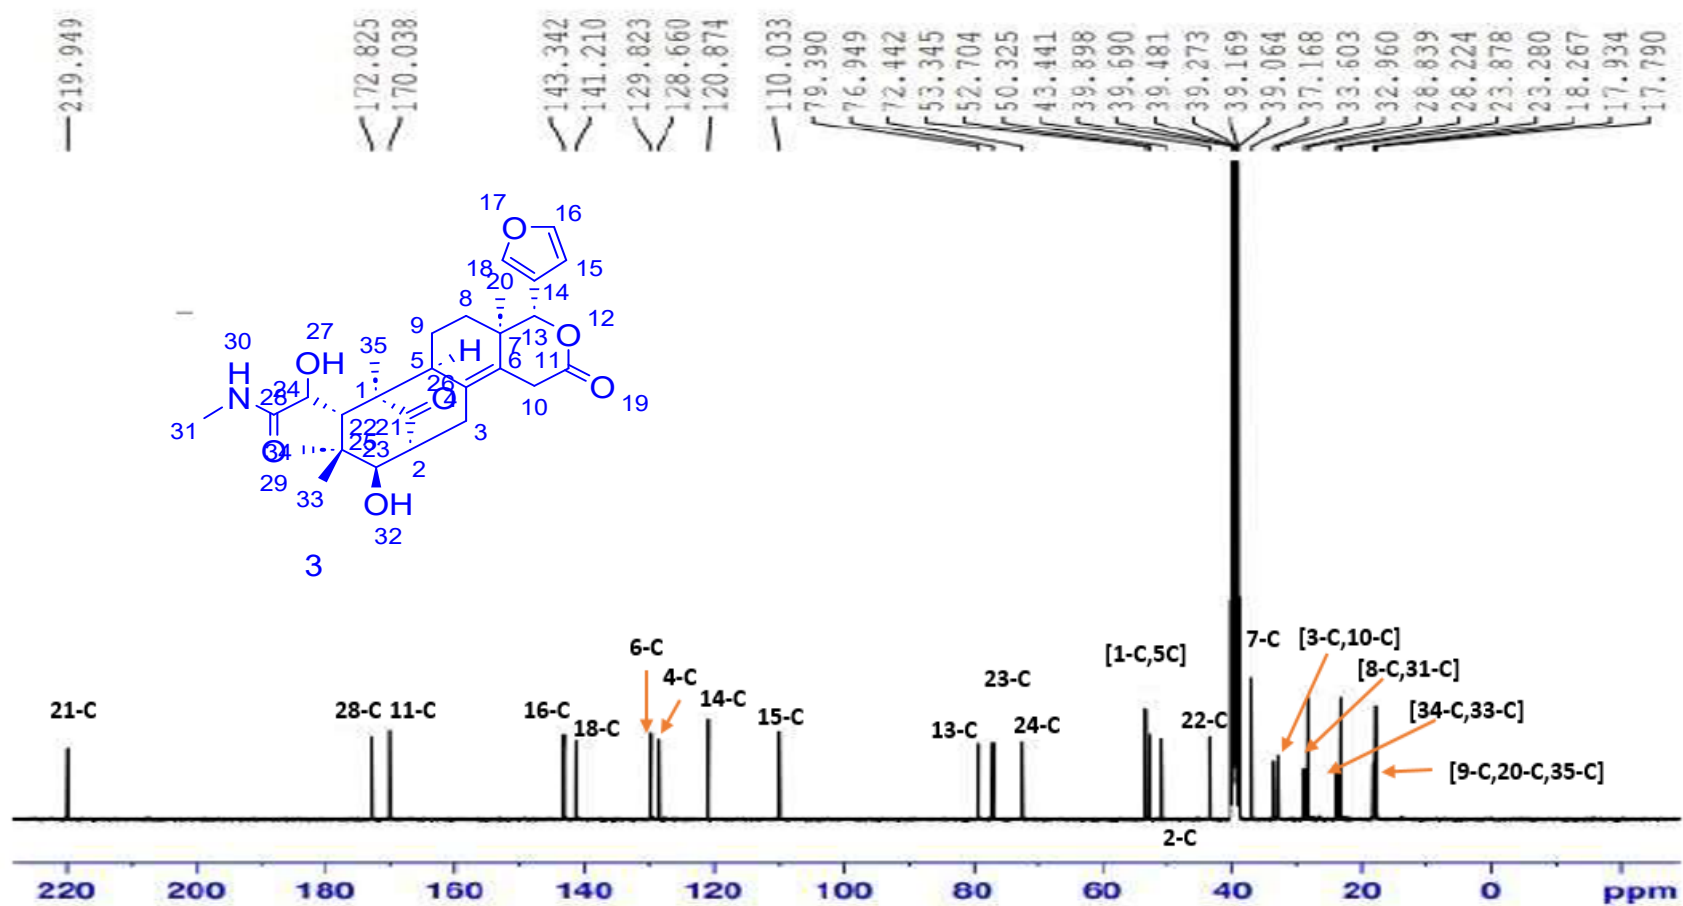

Figure S21. HSQC Spectrum of compound **3** in DMSO-*d*<sub>6</sub>

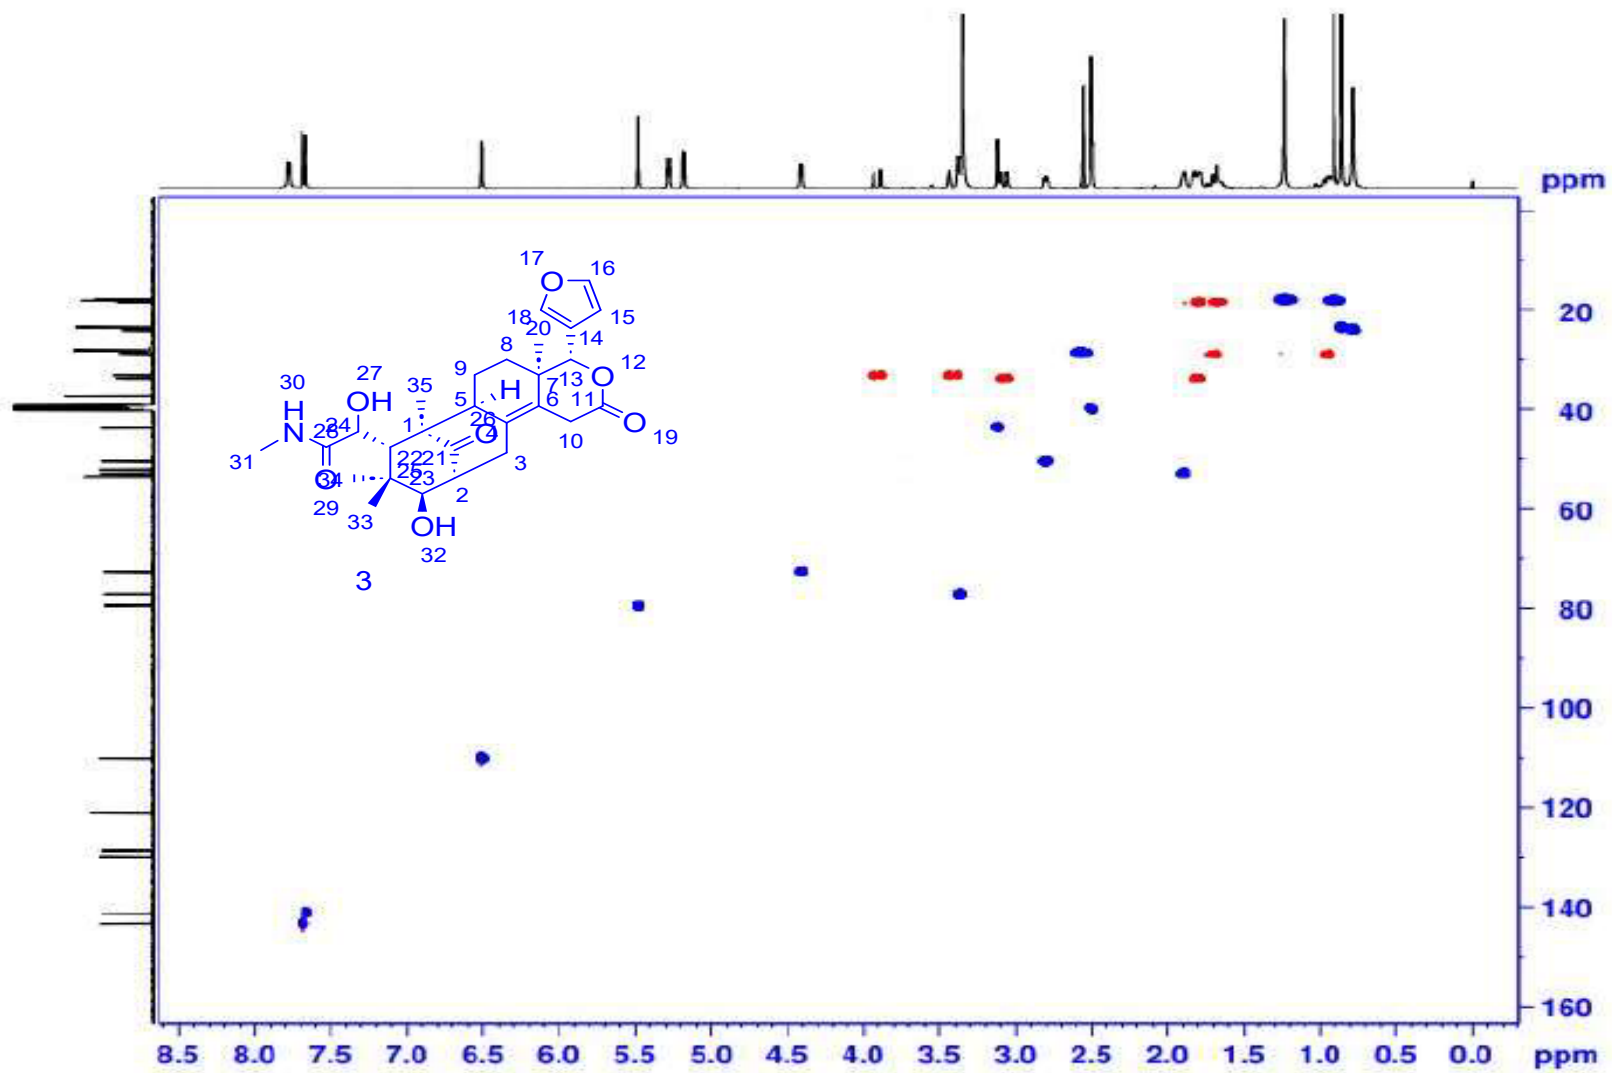

Figure S22. HMBC Spectrum of compound 3 in DMSO- d6

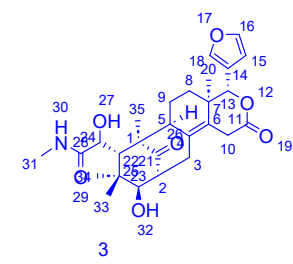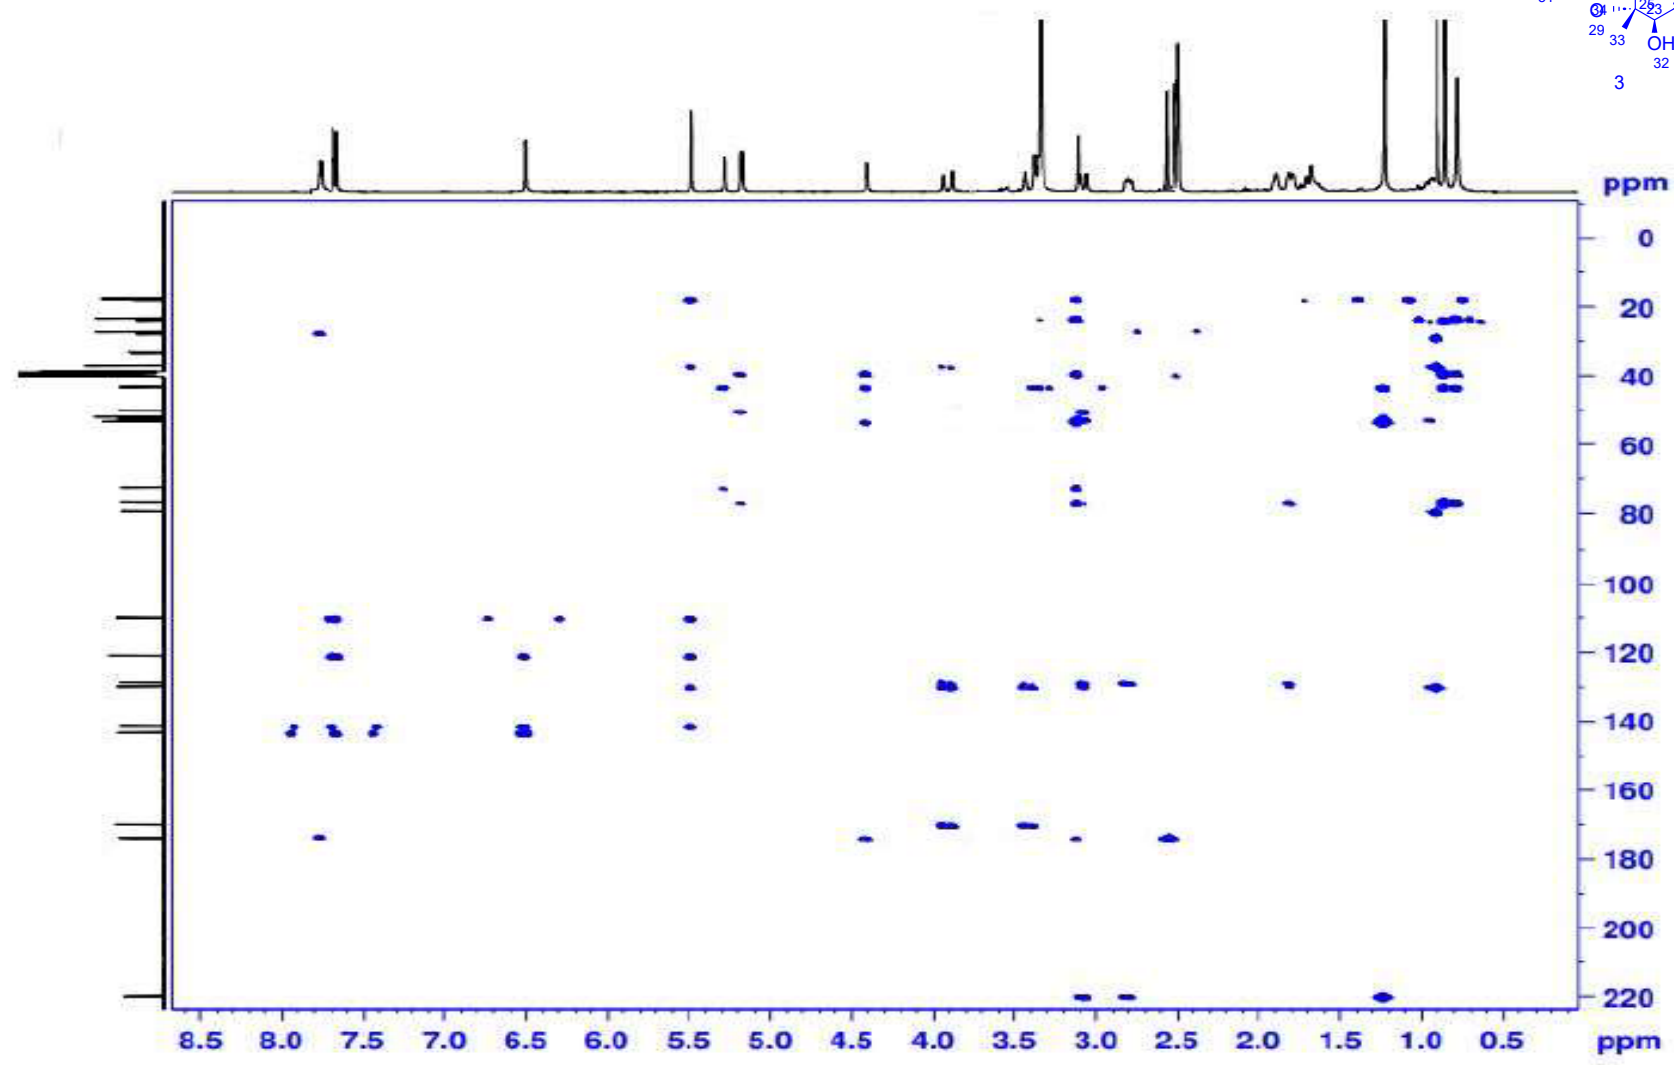

Figure S23. N15 HSQC Spectrum of compound **3** in DMSO-*d*<sub>6</sub>

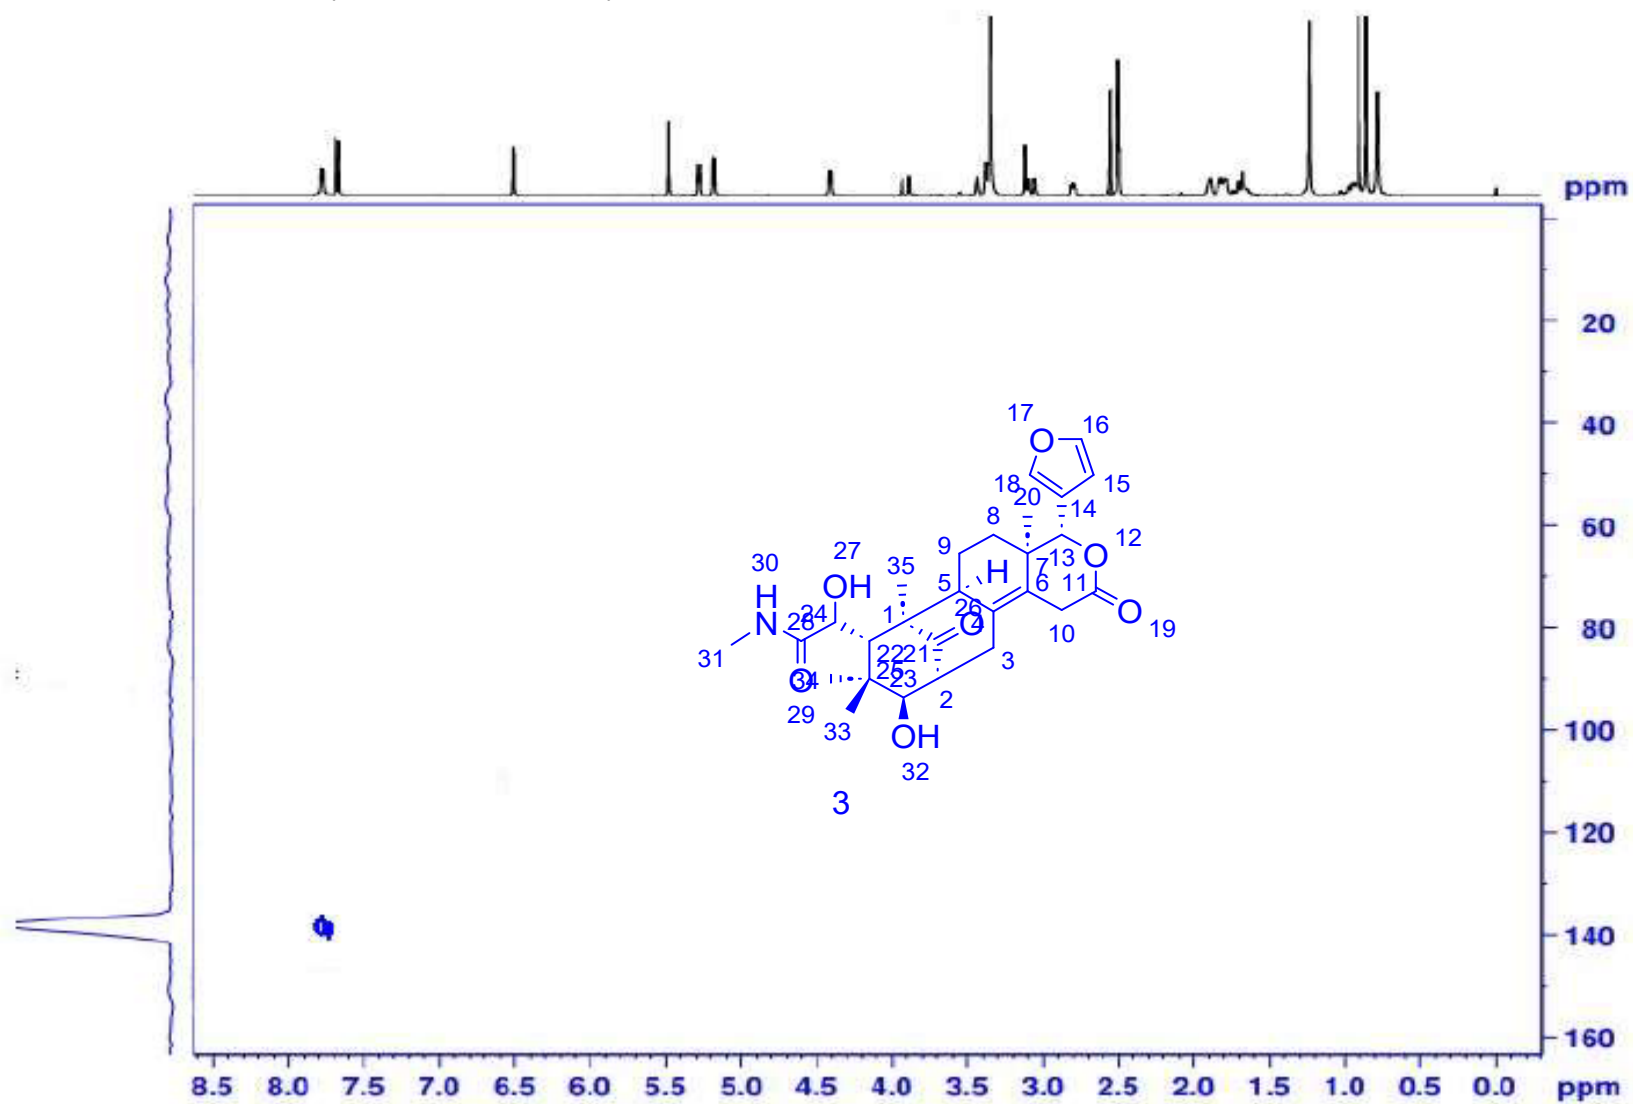

Figure S24. HRESI Mass spectrum of compound 3

Compound: #262-281 RT: 2.43-2.60 AV: 20 NL: 1.44E8  
T: FTMS + p ESI Full ms [100.0000-1500.0000]

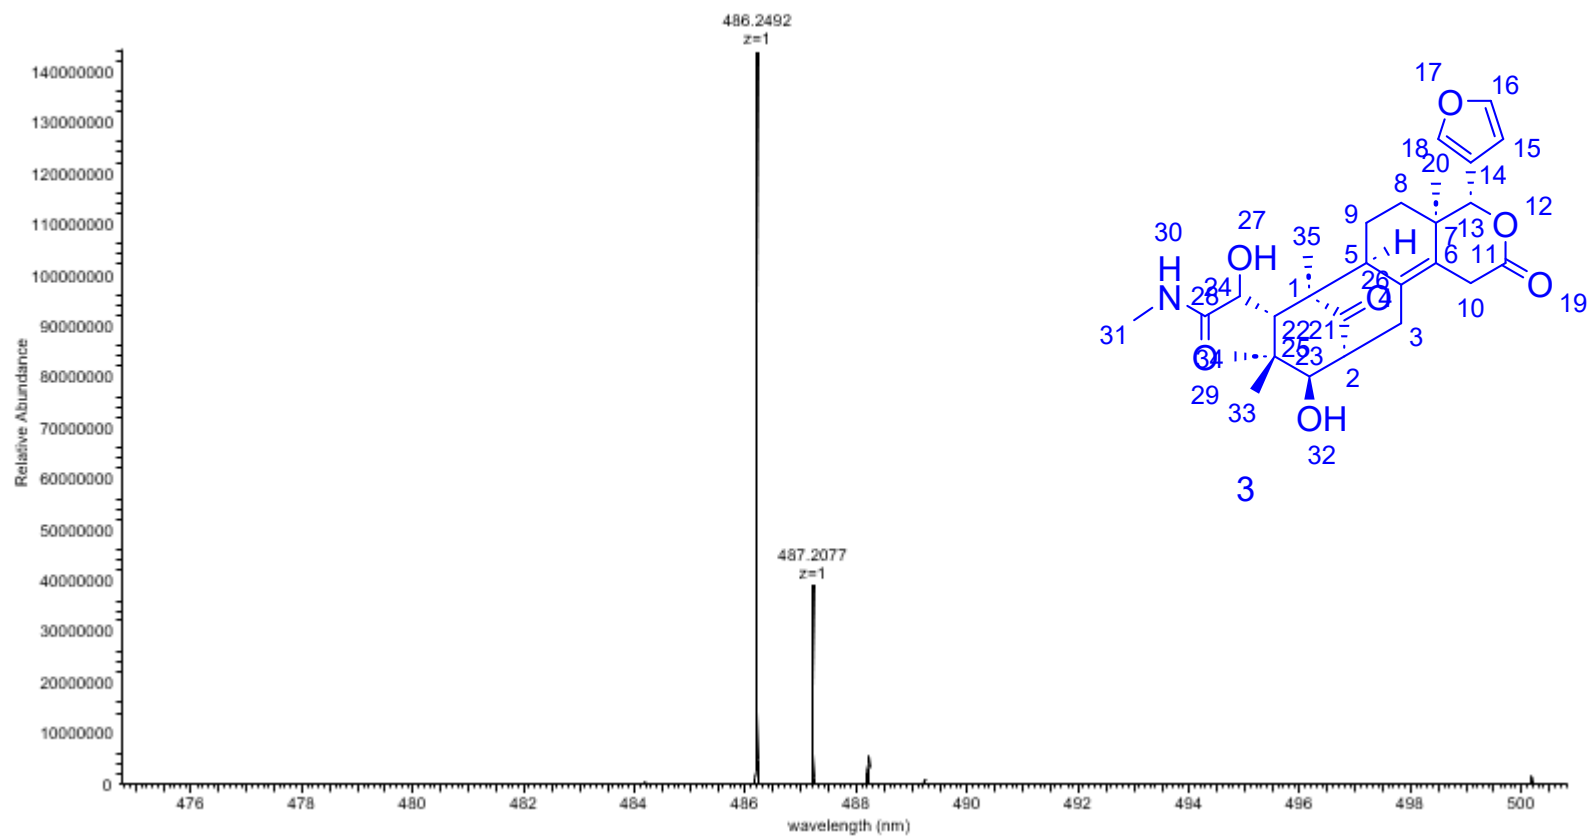

Figure S25. IR spectrum of compound 3

SHIMADZU

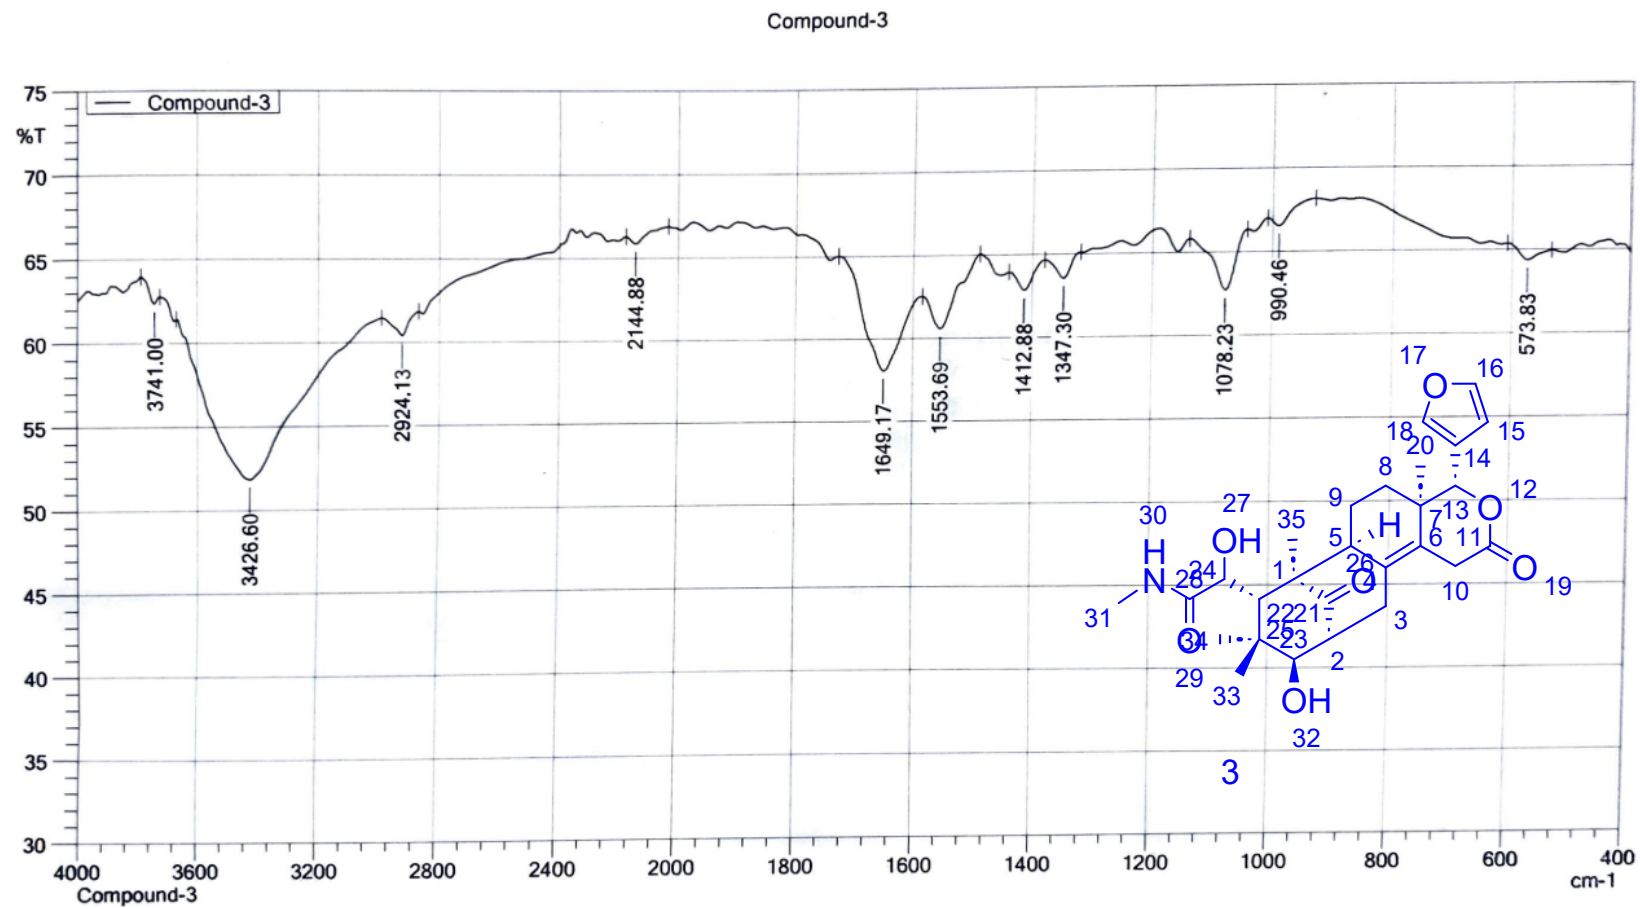



Figure S26. Optical rotation of compound 3

[Measurement Information]

Instrument Name Polarimeter  
 Model Name P-2000  
 Serial No. B209561232  
 Polarizer Dichrom  
 Faraday Cell Flint Glass

Accessory PTC-262  
 Accessory S/N C051961481  
 Temperature 25.00 C  
 Control Sensor Holder  
 Monitor Sensor Holder  
 Start Mode Keep target temperature +/-0.10 C while 5  
 seconds

Light Source WI  
 Monitor wavelength 589 nm  
 D.I.T. 5 sec  
 No. of cycle 5  
 Cycle interval 5 sec  
 Temp. Monitor Holder  
 Temp. Corr. Factor 0 at 20 C  
 Aperture(S) 8.0mm  
 Aperture(L) Auto  
 Mode Specific O.R.  
 Path Length 10 mm  
 Concentration 0.1 w/v%  
 Water content of sample 0 %  
 Factor 1

Comment 0.1% in Methanol  
 Username  
 Division  
 Organization Aragen Life Sciences Pvt Ltd

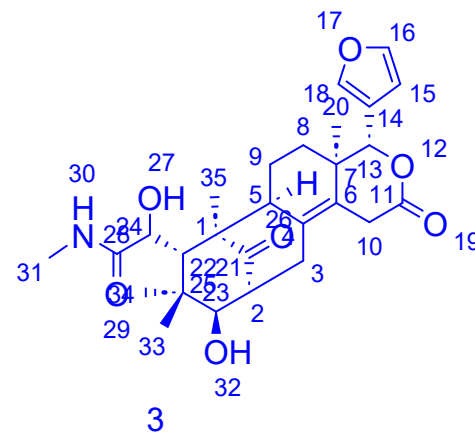

|   | No. | Sample No. | Calc. Data   | Meas. Data | Temperature(C) | Blank | Comment                  |
|---|-----|------------|--------------|------------|----------------|-------|--------------------------|
| 1 | *   | 1          | Compound-3-1 | -125.2000  | -0.0125        | 25.00 | +0.0064 0.1% in Methanol |
| 2 | *   | 2          | Compound-3-2 | -123.2000  | -0.0123        | 25.00 | +0.0064 0.1% in Methanol |
| 3 | *   | 3          | Compound-3-3 | -123.2000  | -0.0123        | 25.00 | +0.0064 0.1% in Methanol |
| 4 | *   | 4          | Compound-3-4 | -128.2000  | -0.0128        | 24.99 | +0.0064 0.1% in Methanol |
| 5 | *   | 5          | Compound-3-5 | -129.2000  | -0.0129        | 24.99 | +0.0064 0.1% in Methanol |
| 6 | *   | 6          | Avg.         | -125.8000  |                |       |                          |
| 7 |     | 7          | S.D          | 2.7928     |                |       |                          |
| 8 |     | 8          | C.V          | 2.2201     |                |       |                          |

Figure S27. UV spectrum of compound 3

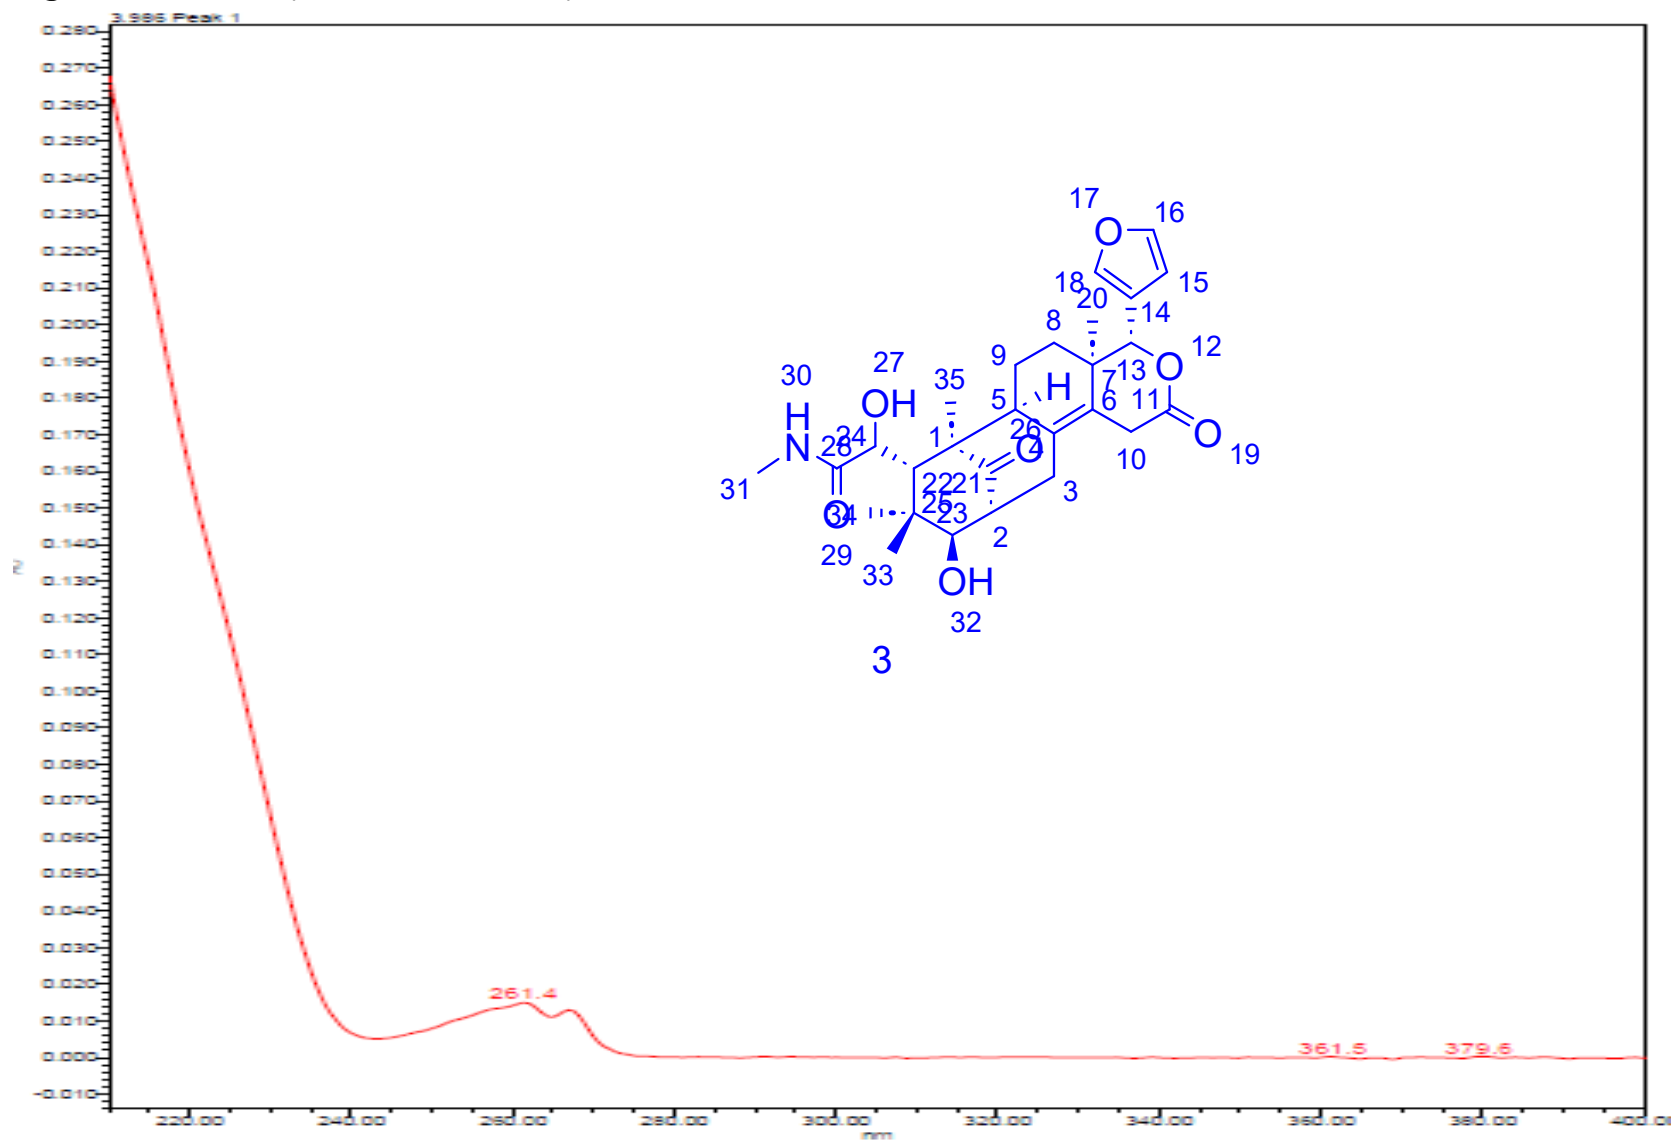

Figure S28.  $^1\text{H}$  NMR Spectrum of compound **4** at (400 MHz) in  $\text{DMSO-}d_6$

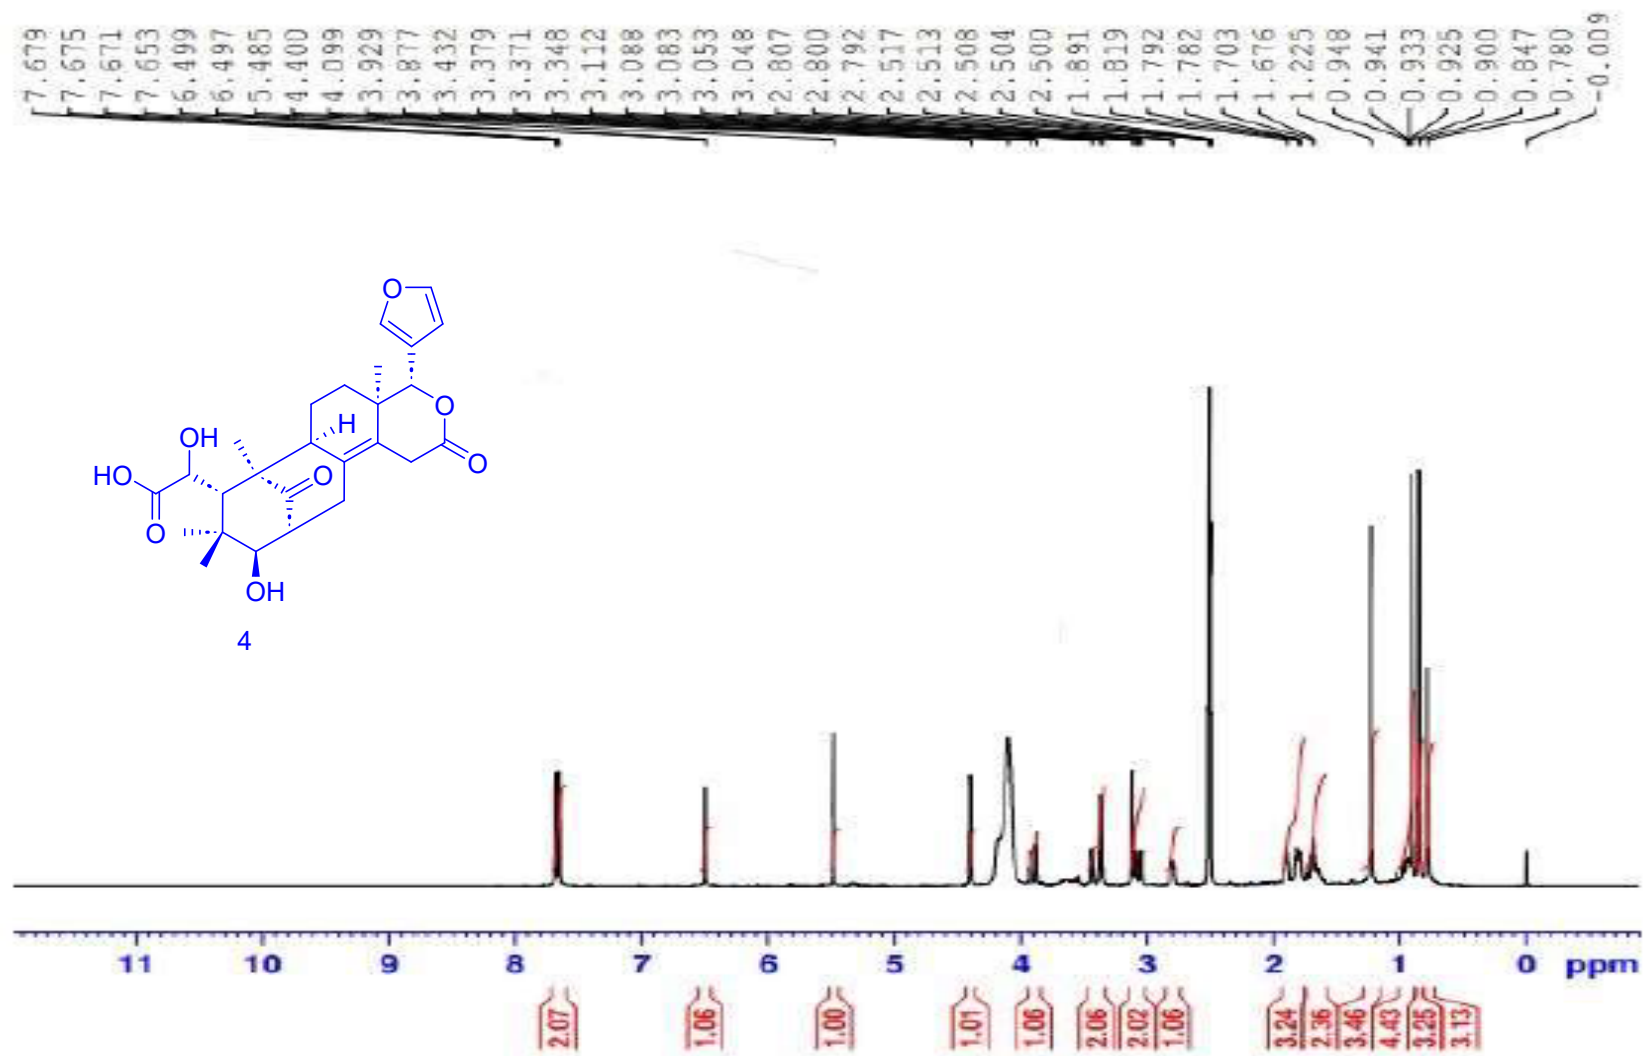

Figure S29.  $^{13}\text{C}$  NMR Spectrum of compound **4** at (400 MHz) in DMSO-  $\text{d}_6$

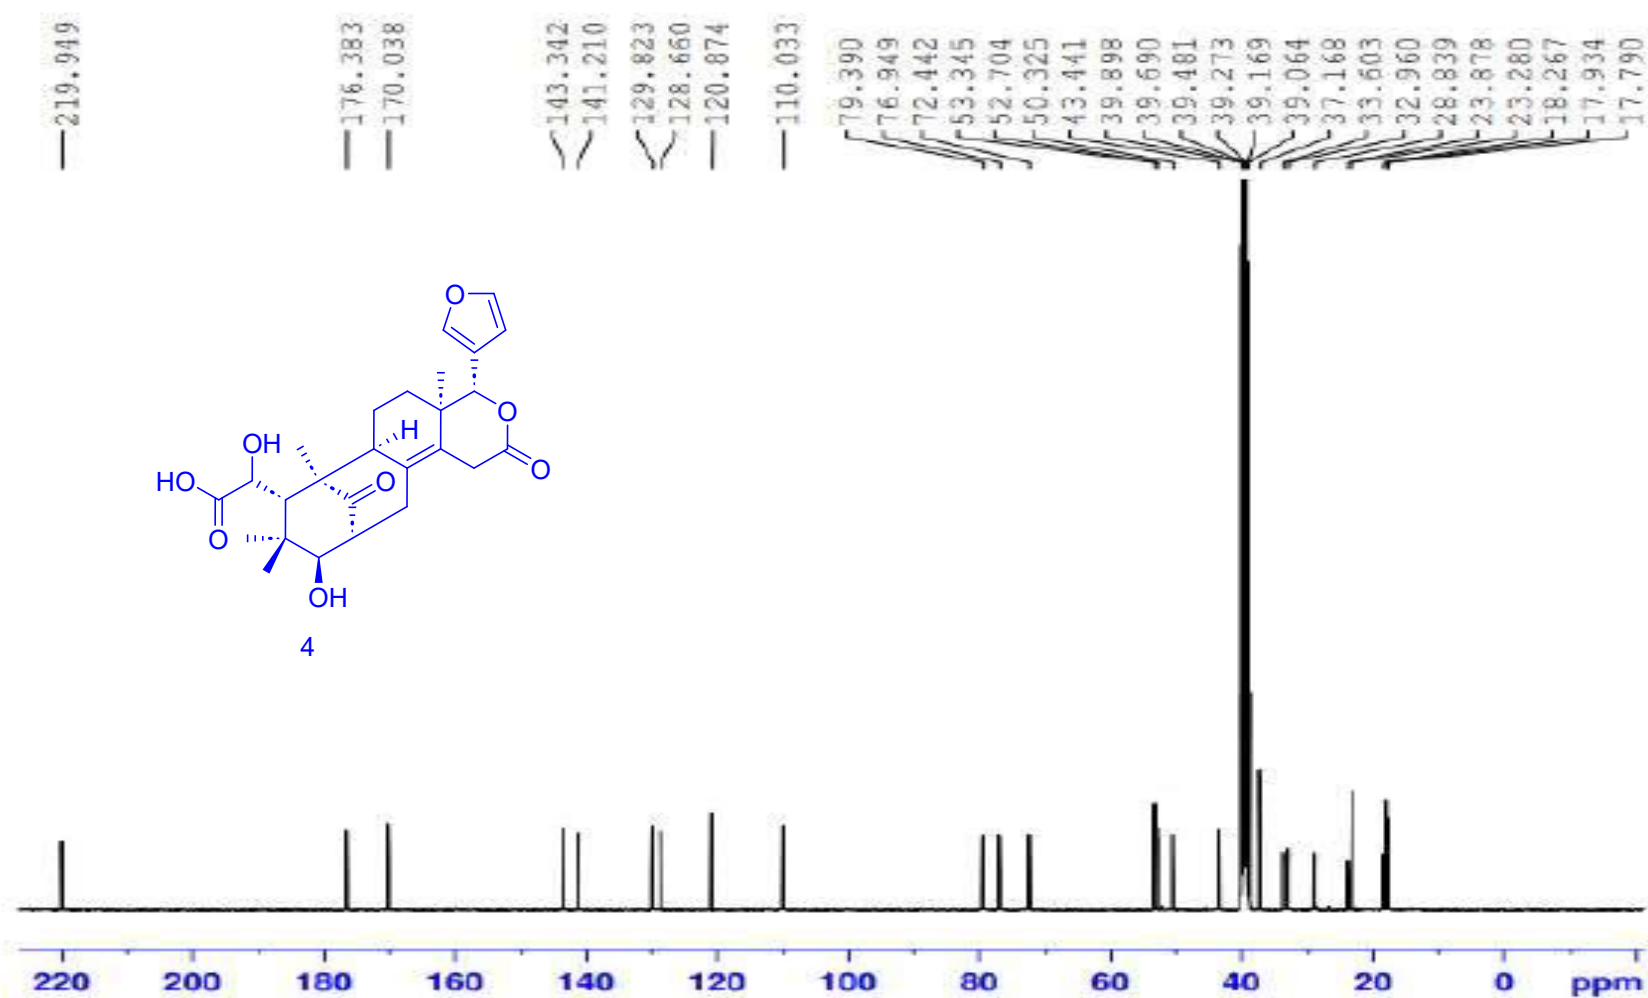

Figure S30. HSQC Spectrum of compound 4 in DMSO-*d*6

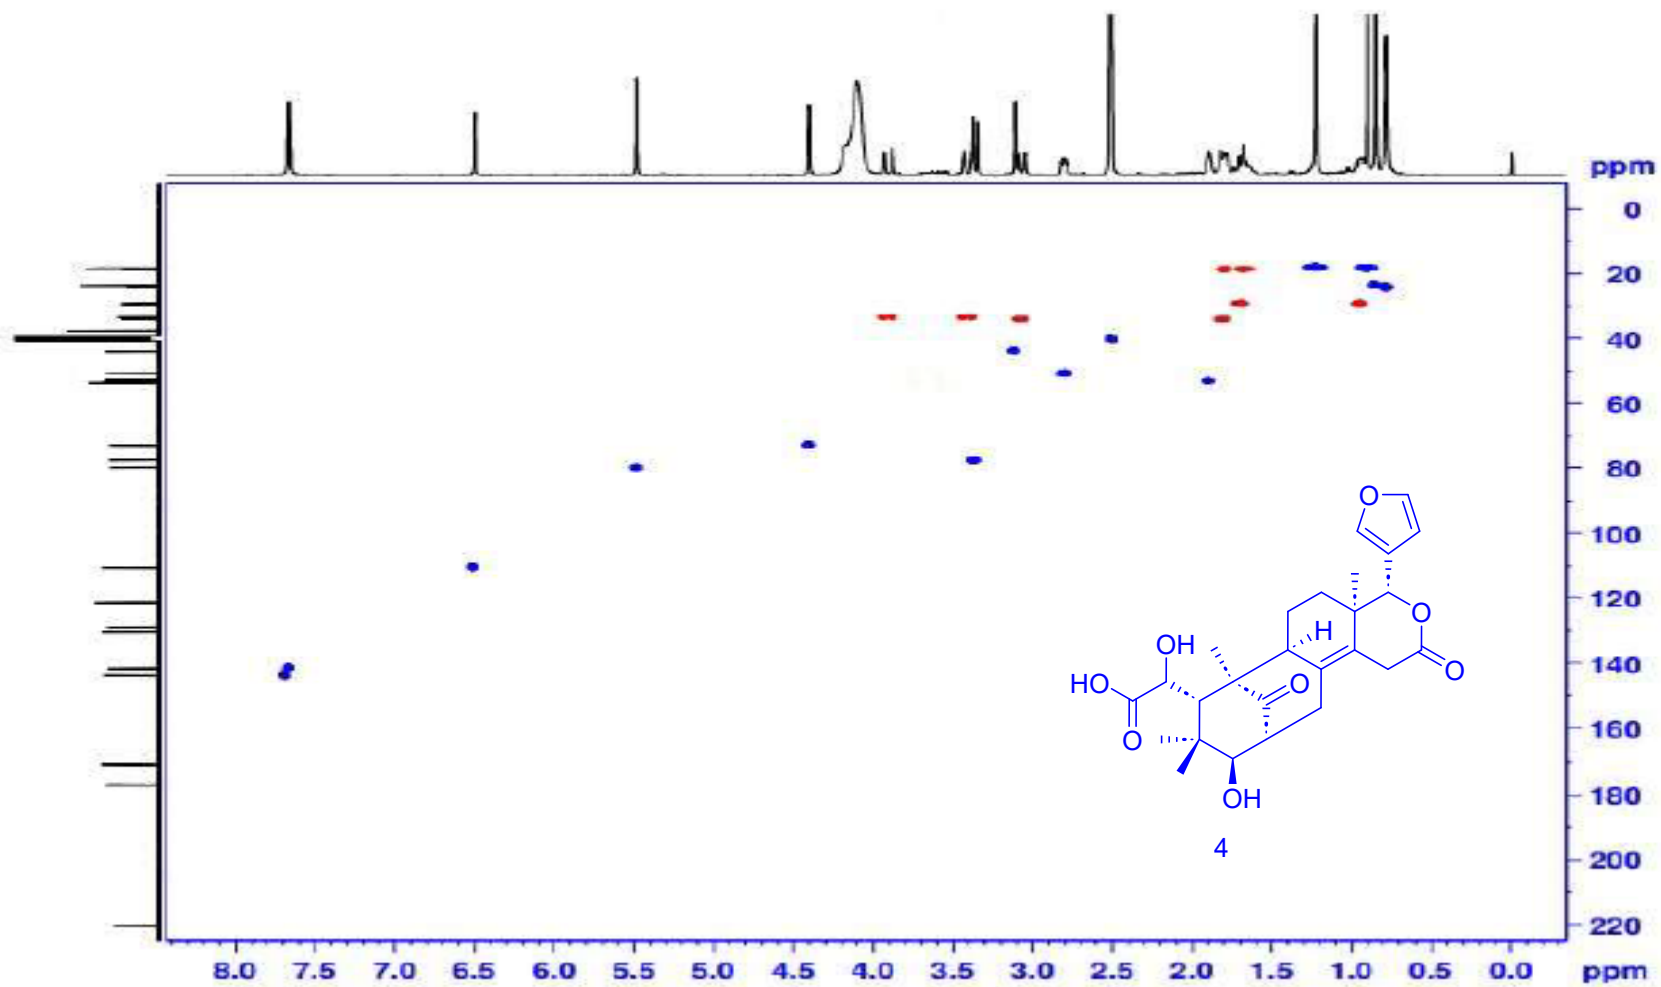

Figure S31. HMBC Spectrum of compound 4 in DMSO- d6

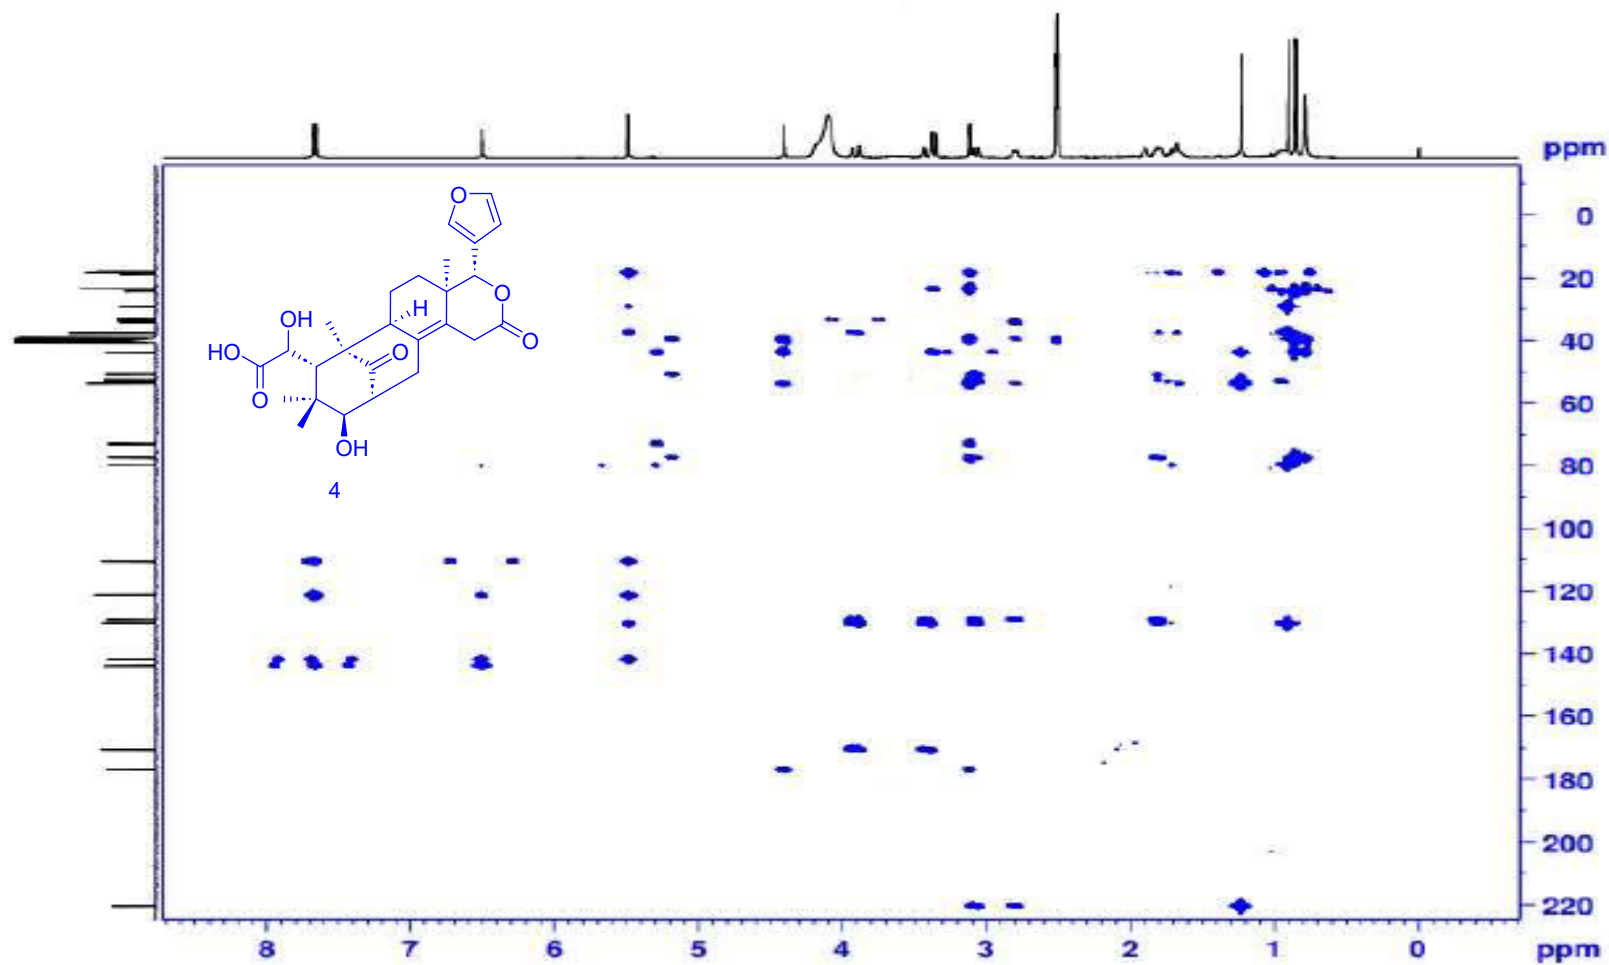

Figure S32. HRESI Spectrum of compound 4

Compound2#41-71 RT: 0.38-0.65 AV: 31 NL: 5.41E8  
T: FTMS + p ESI Full ms [100.0000-1500.0000]

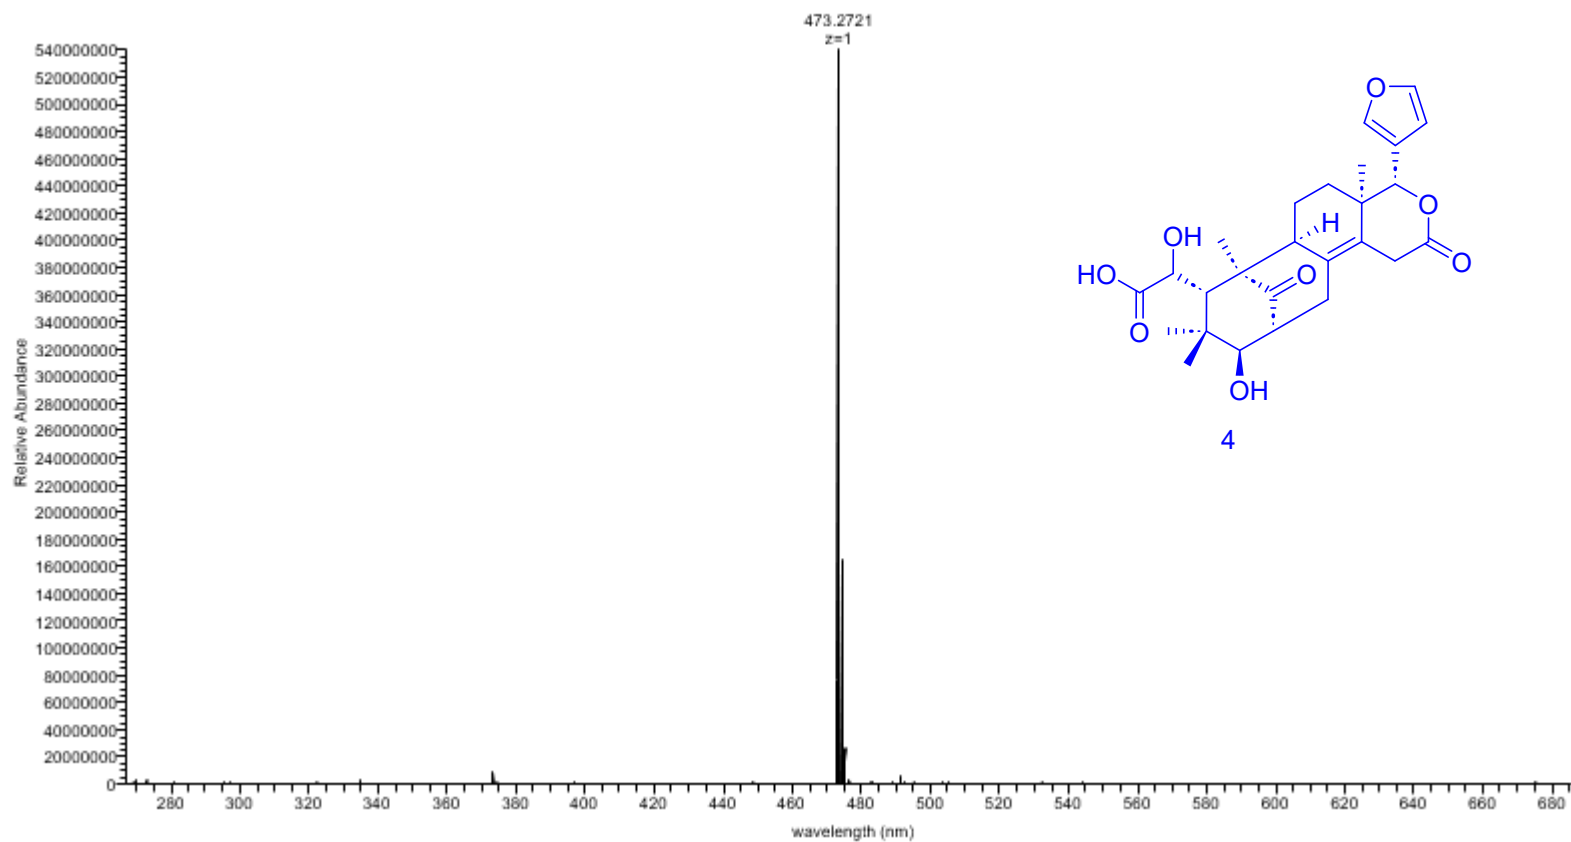

Figure S33.  $^1\text{H}$  NMR Spectrum of compound **5** at (400 MHz) in  $\text{DMSO-}d_6$

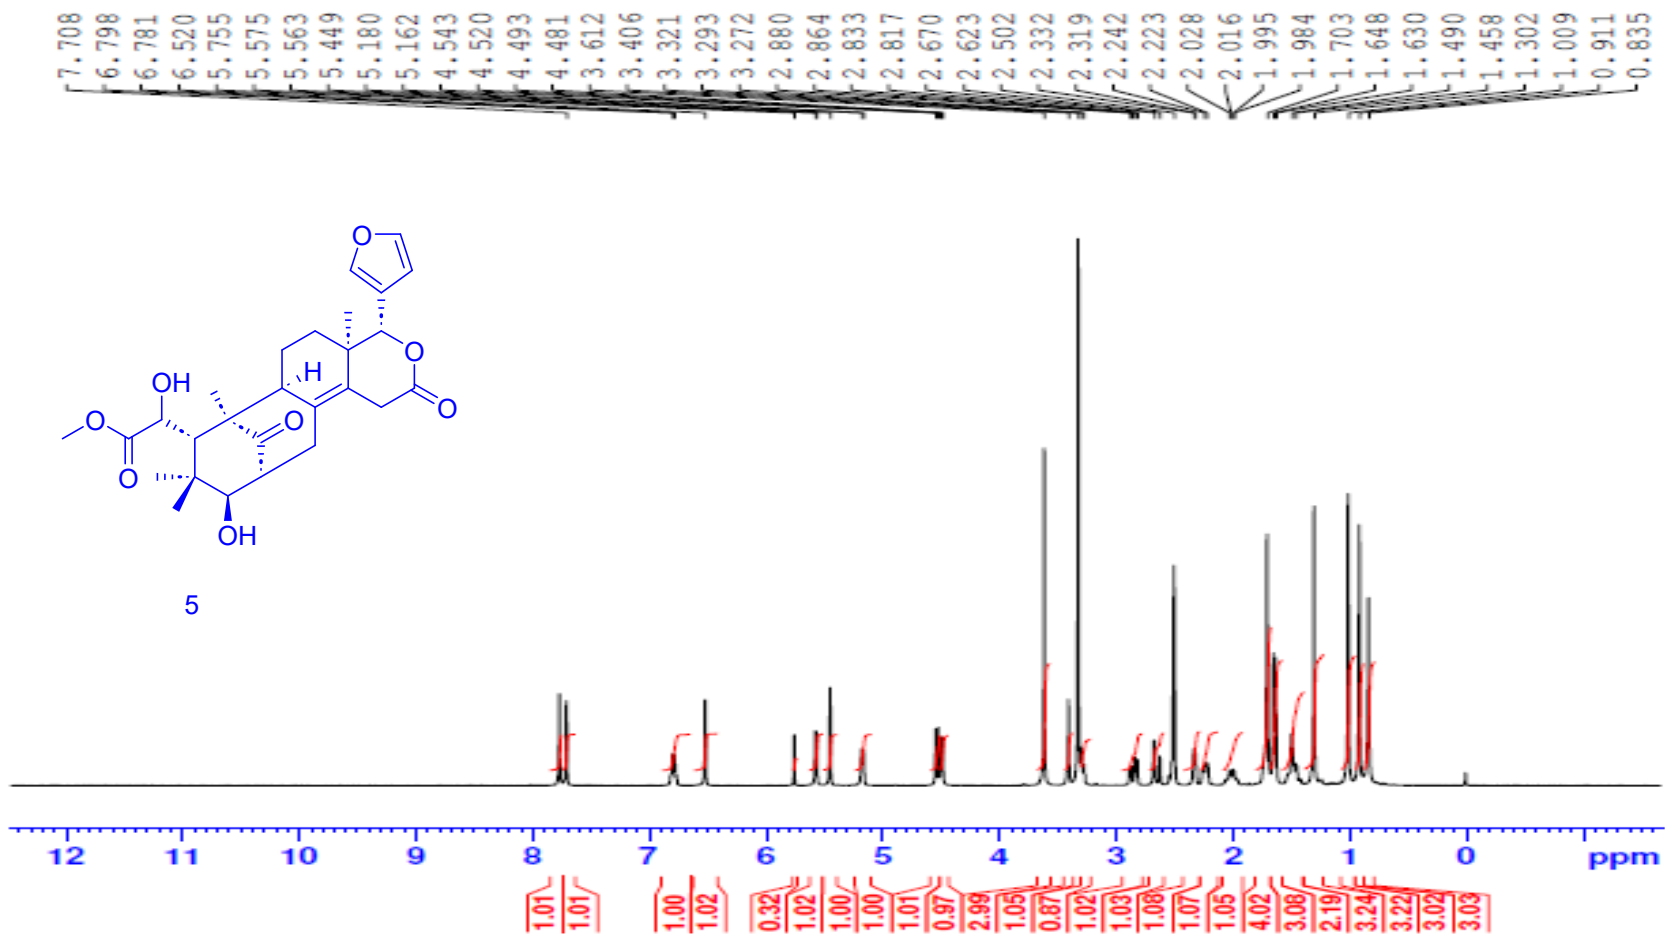



Figure S34.  $^{13}\text{C}$  NMR Spectrum of compound **5** at (400 MHz) in  $\text{DMSO-}d_6$

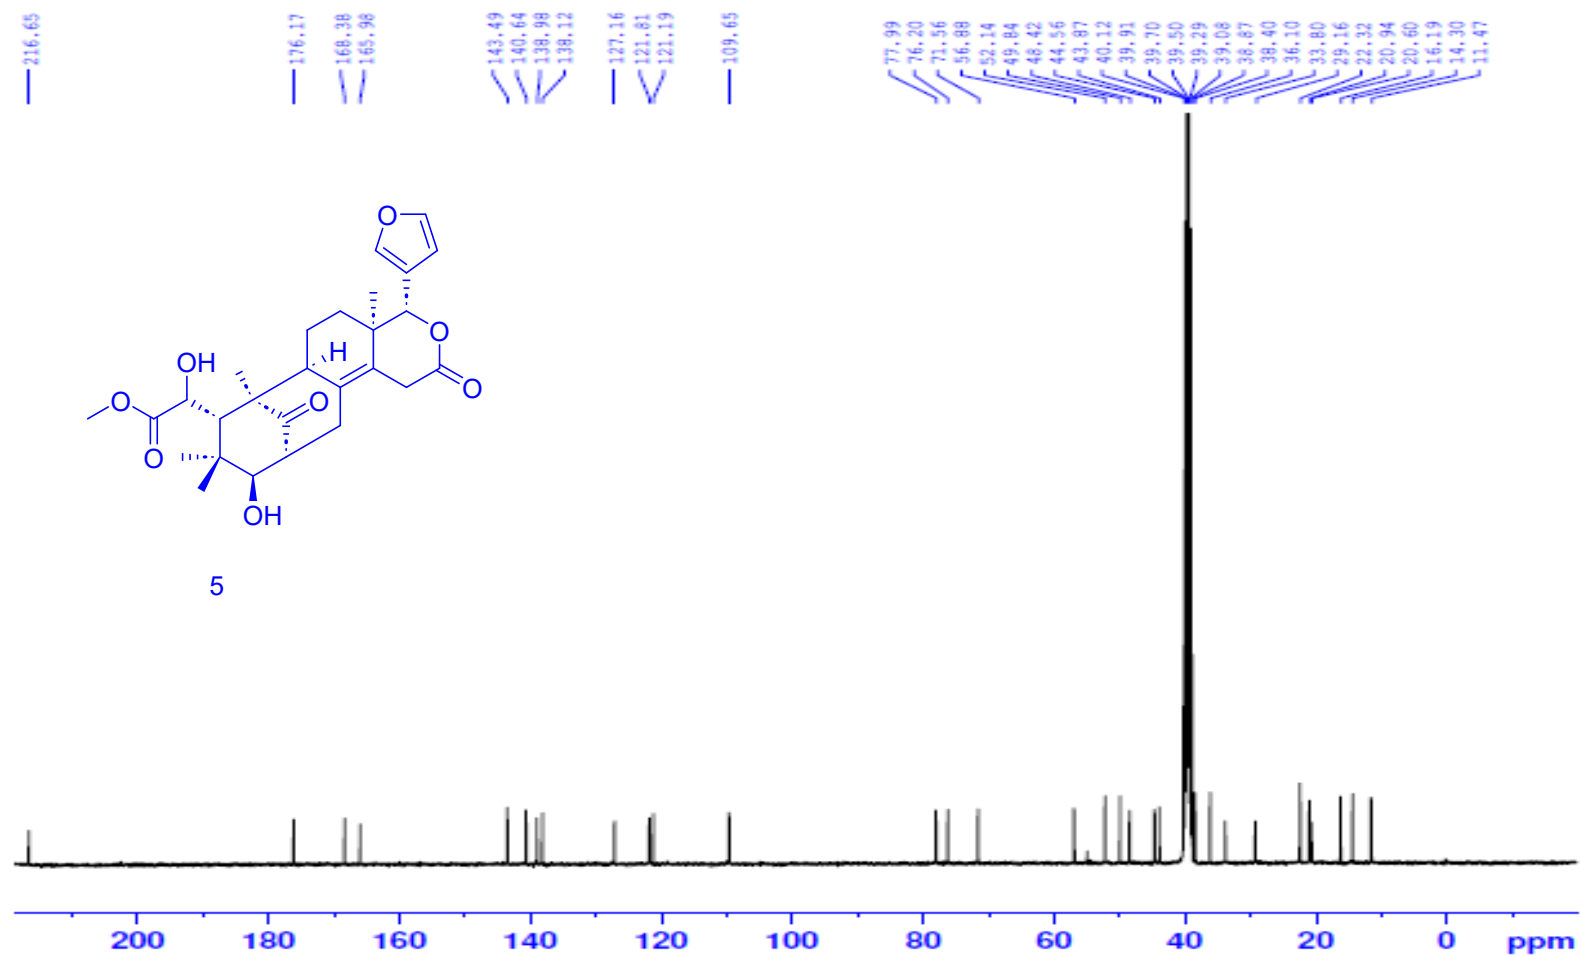

Figure S35. HSQC Spectrum of compound 5 in DMSO-*d*6

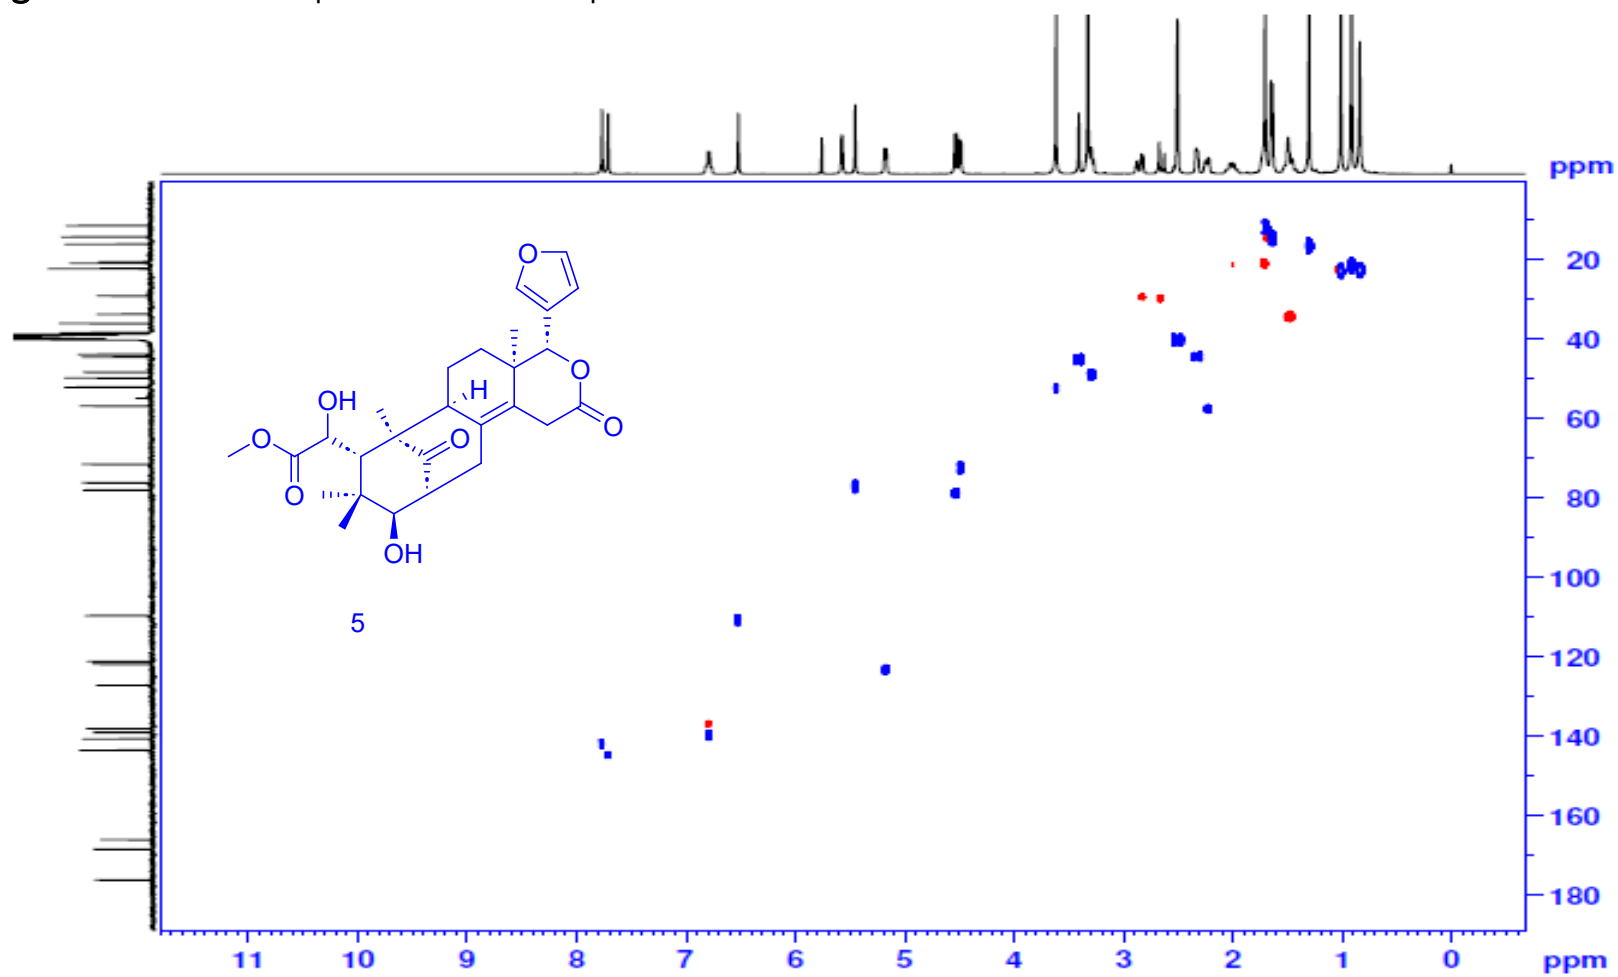

Figure S36. HMBC Spectrum of compound 5 in DMSO-*d*<sub>6</sub>

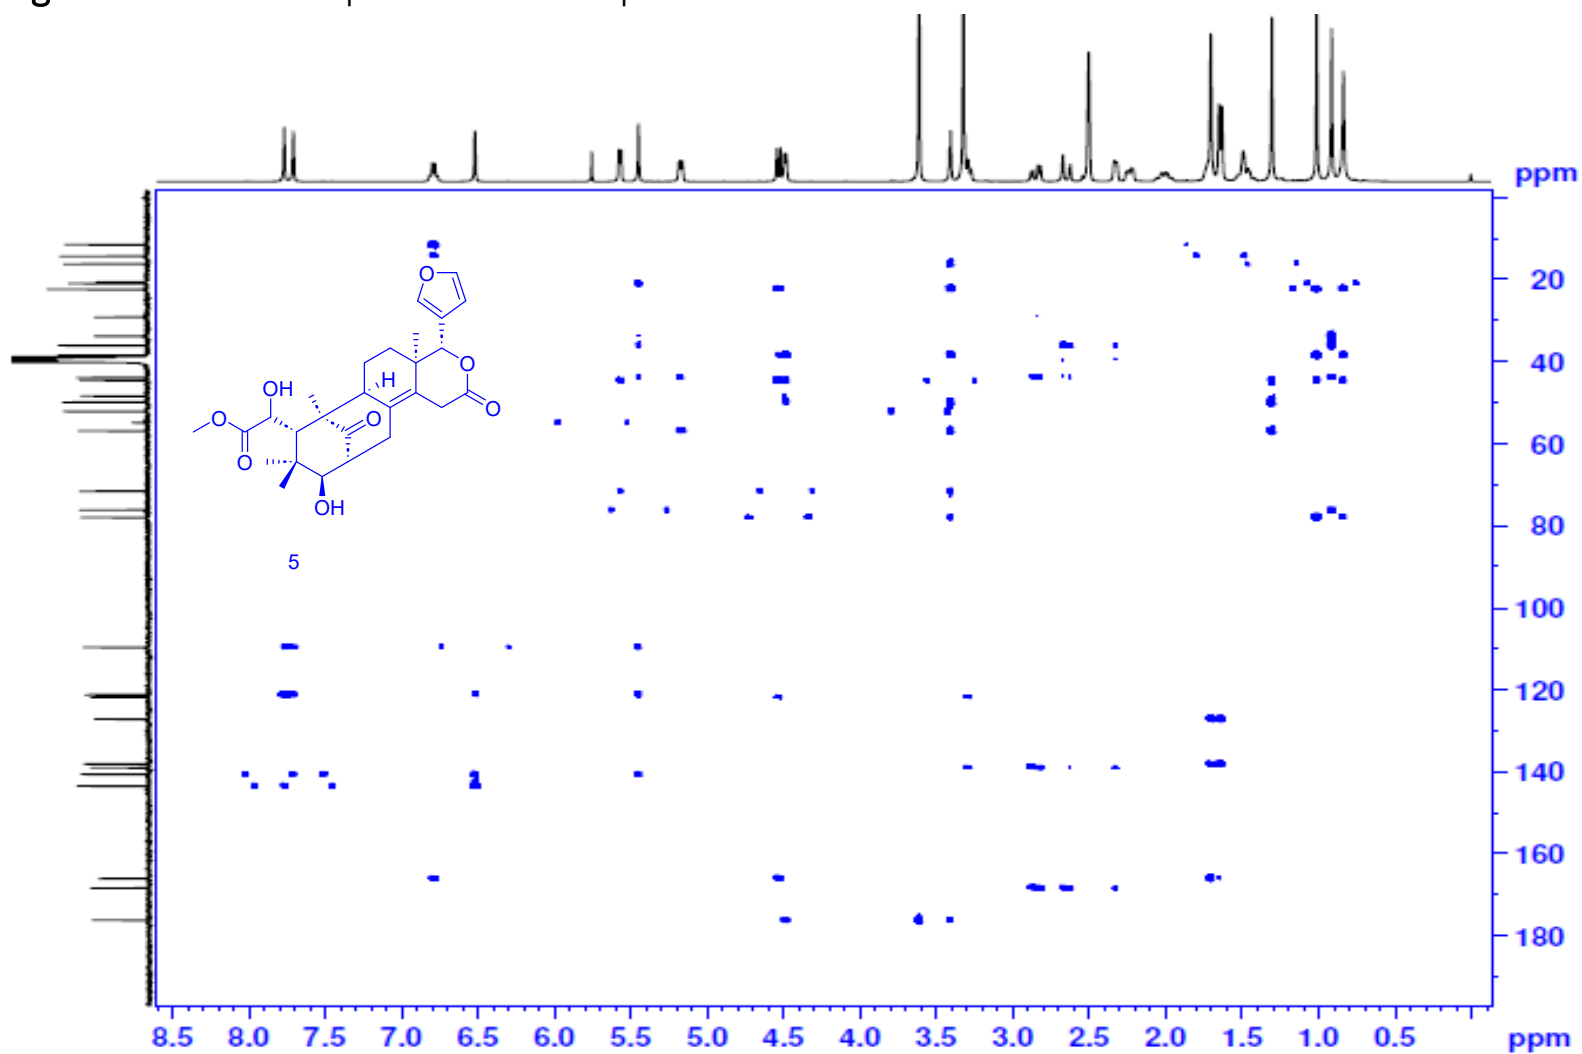

Figure S37. HRESI Mass Spectrum of compound 5

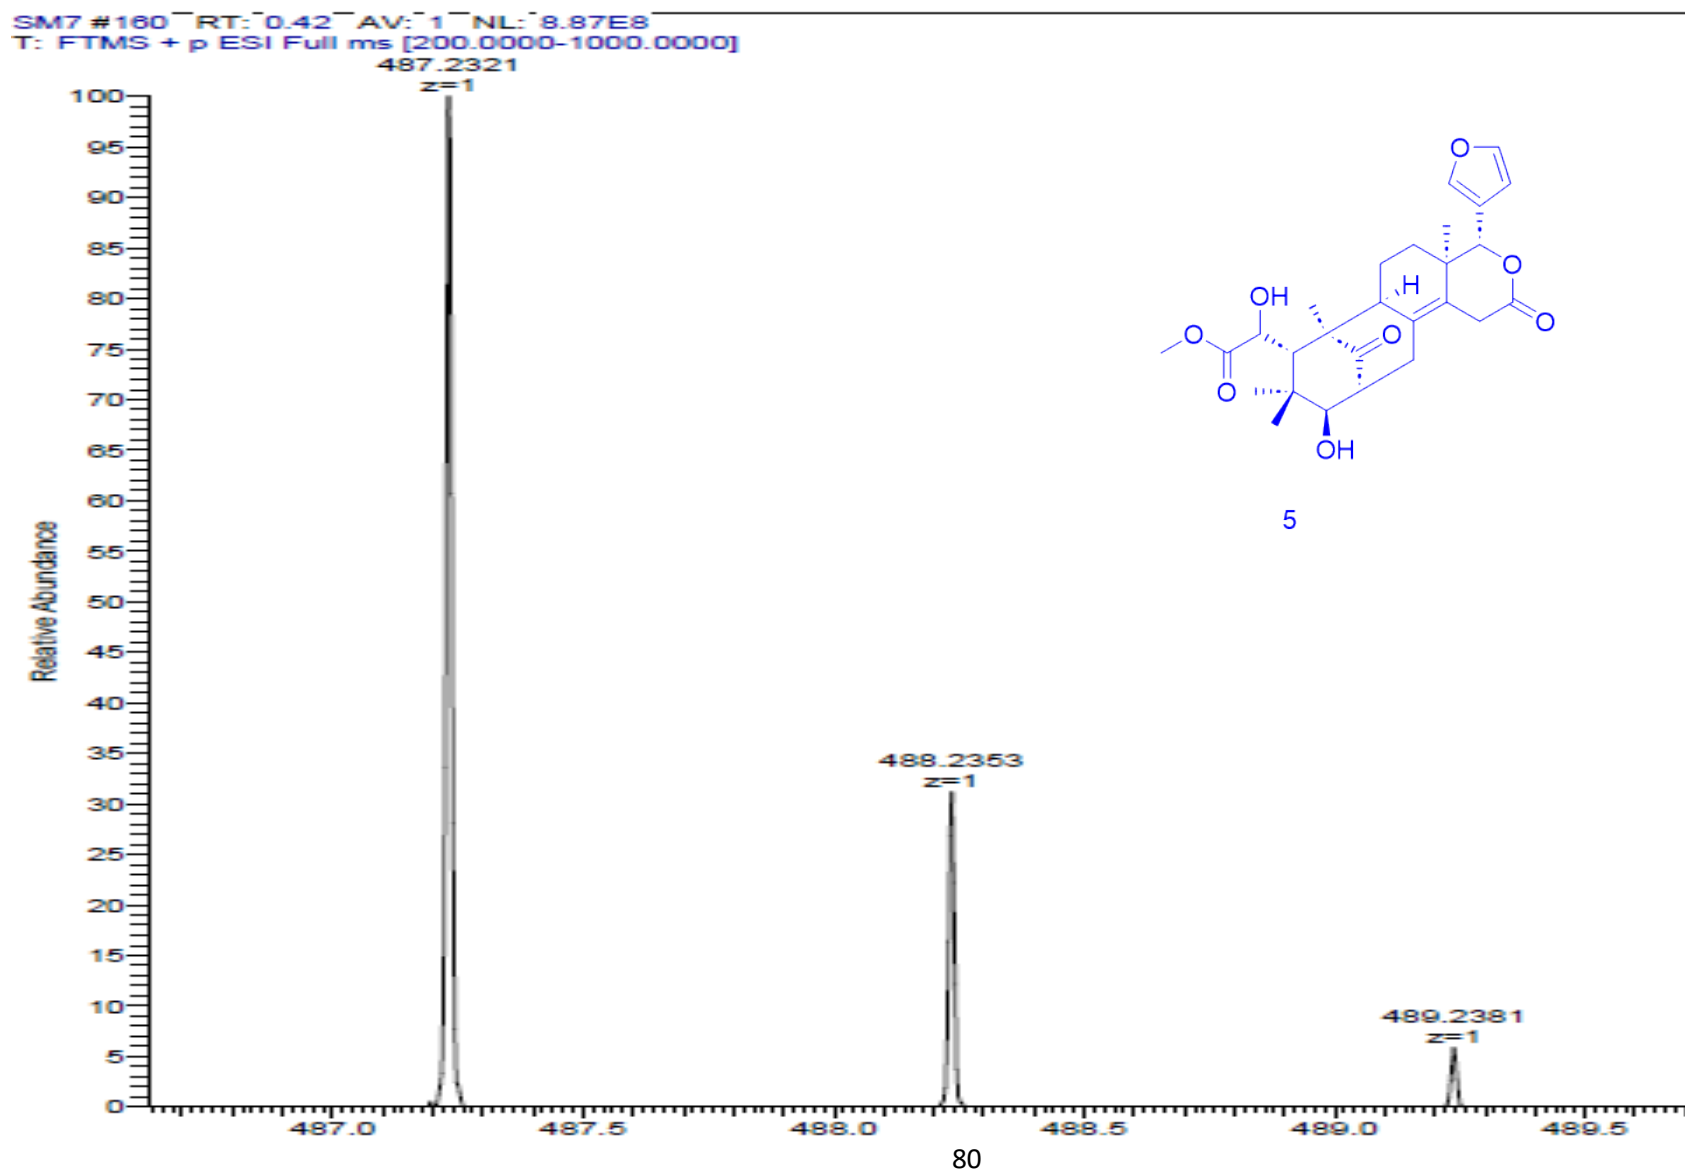

Figure S38. <sup>1</sup>H NMR Spectrum of compound **6** at (400 MHz) in DMSO-*d*<sub>6</sub>

4-(furan-3-yl)-8-(1-hydroxy-2-methoxy-2-oxoethyl)-4a,7,9,9-tetramethyl-2,13-dioxo-1,4,4a,5,6,6a,7,8,9,10,11,12b-dodecahydro-2H-7,11-methanocycloocta[f]isochromen-10-yl (E)-2-methylbut-2-enoate

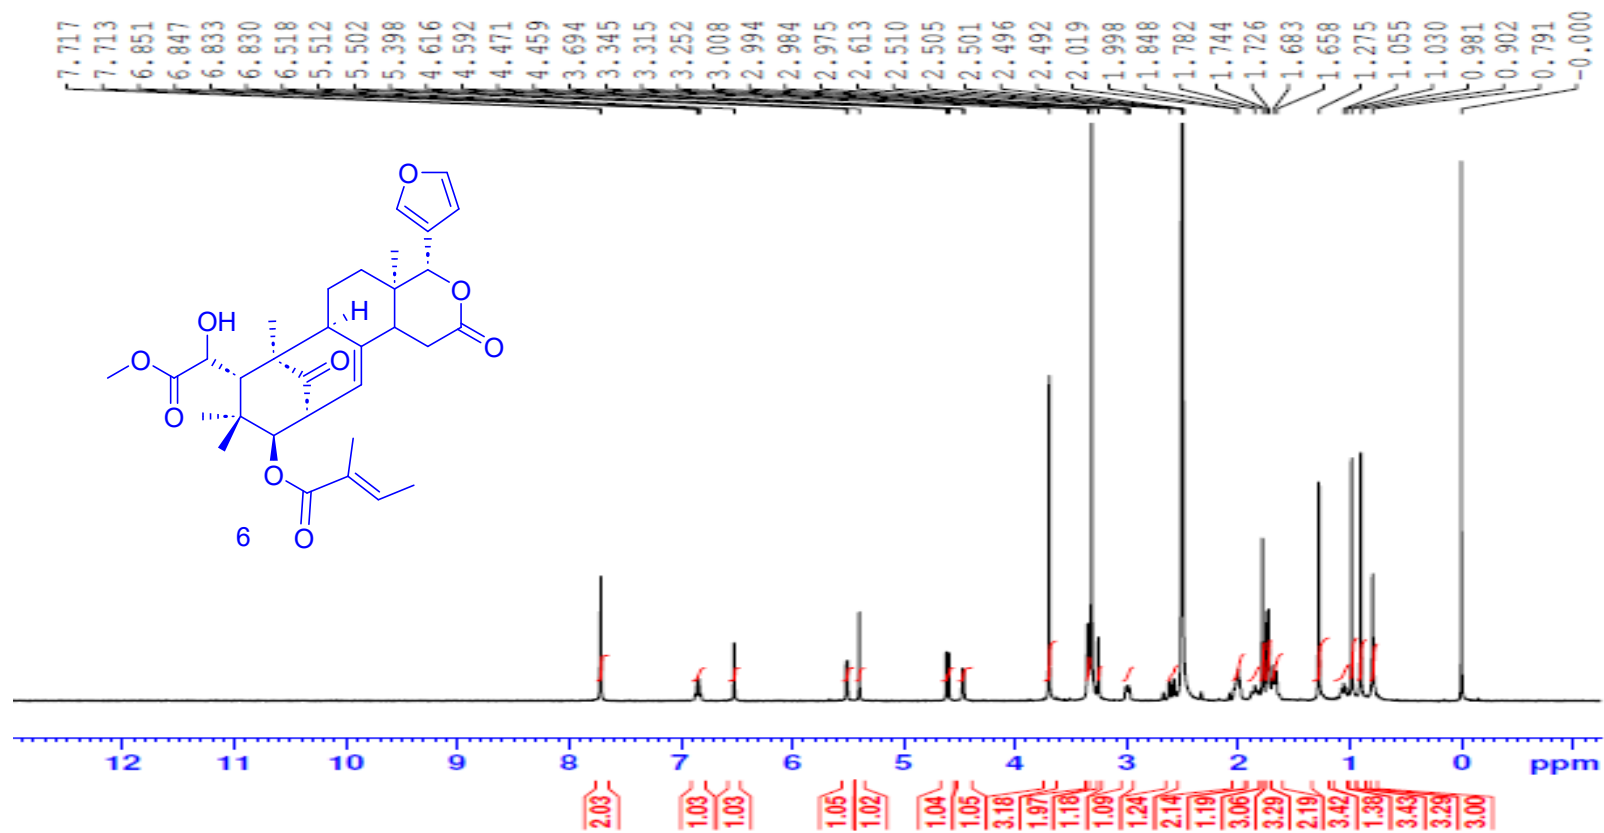

Figure S39.  $^{13}\text{C}$  NMR Spectrum of compound **6** at (400 MHz) in  $\text{DMSO-}d_6$

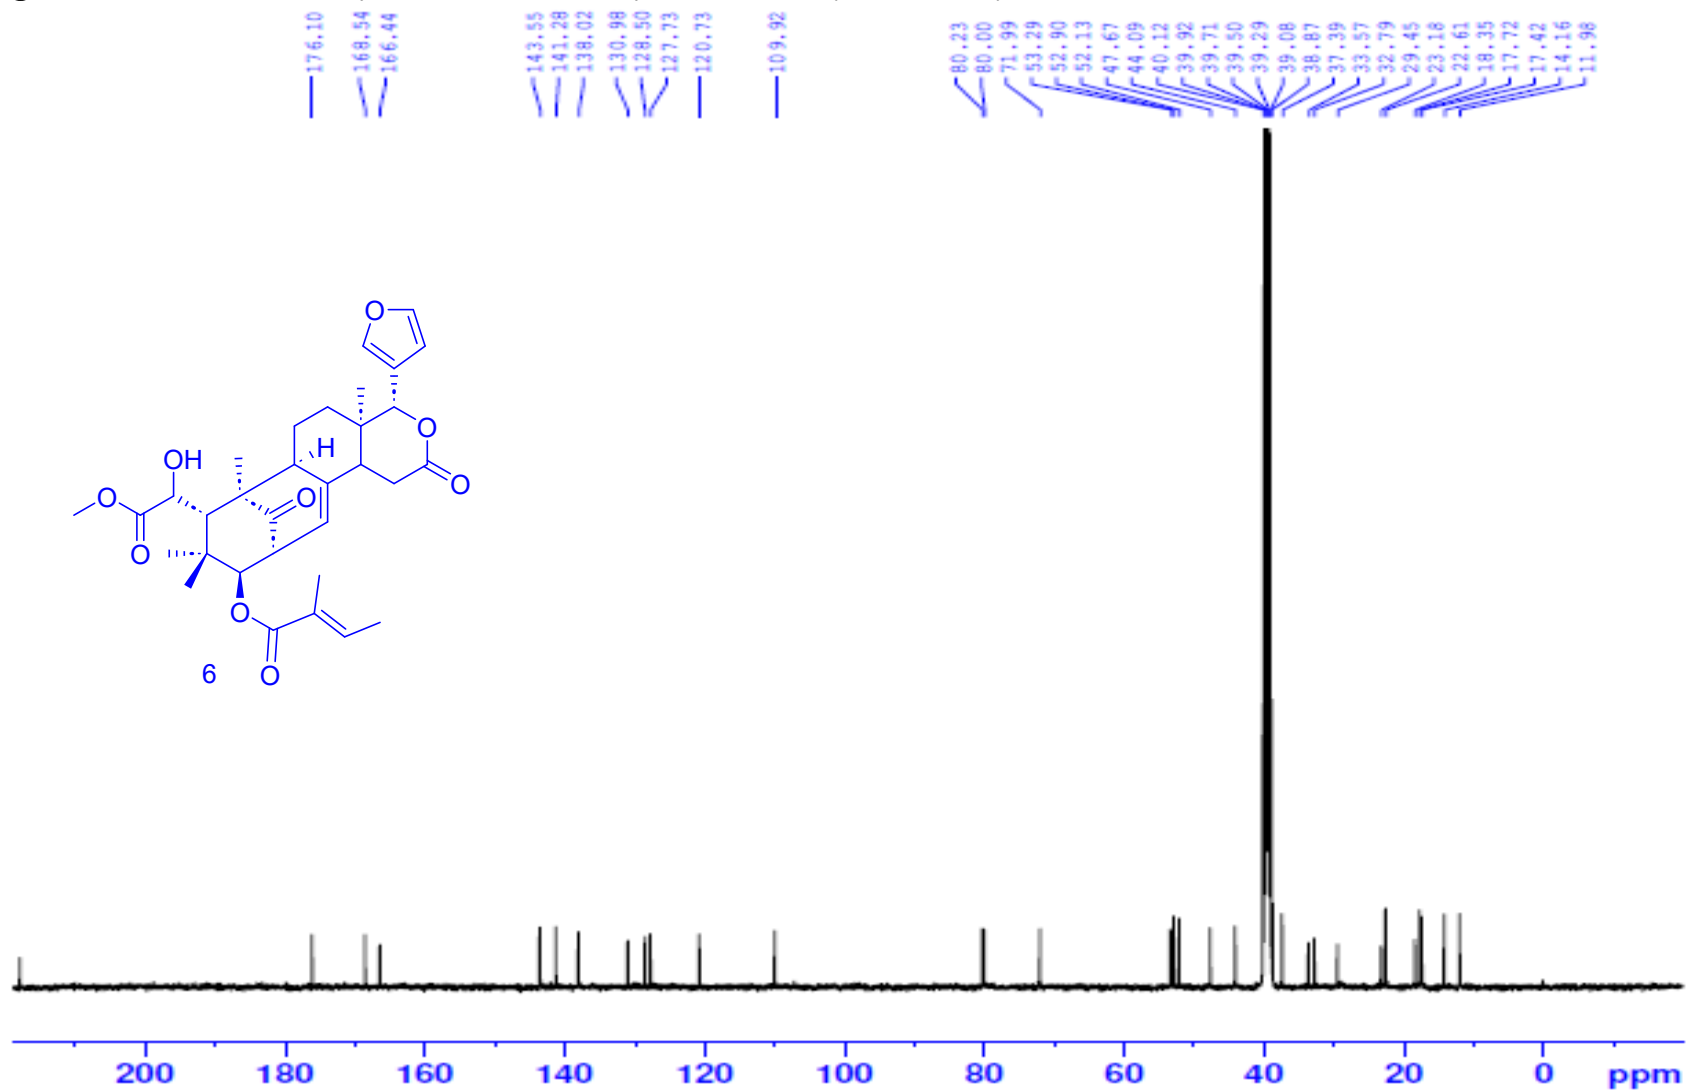

Figure S40. HSQC Spectrum of compound **6** in DMSO-*d*<sub>6</sub>

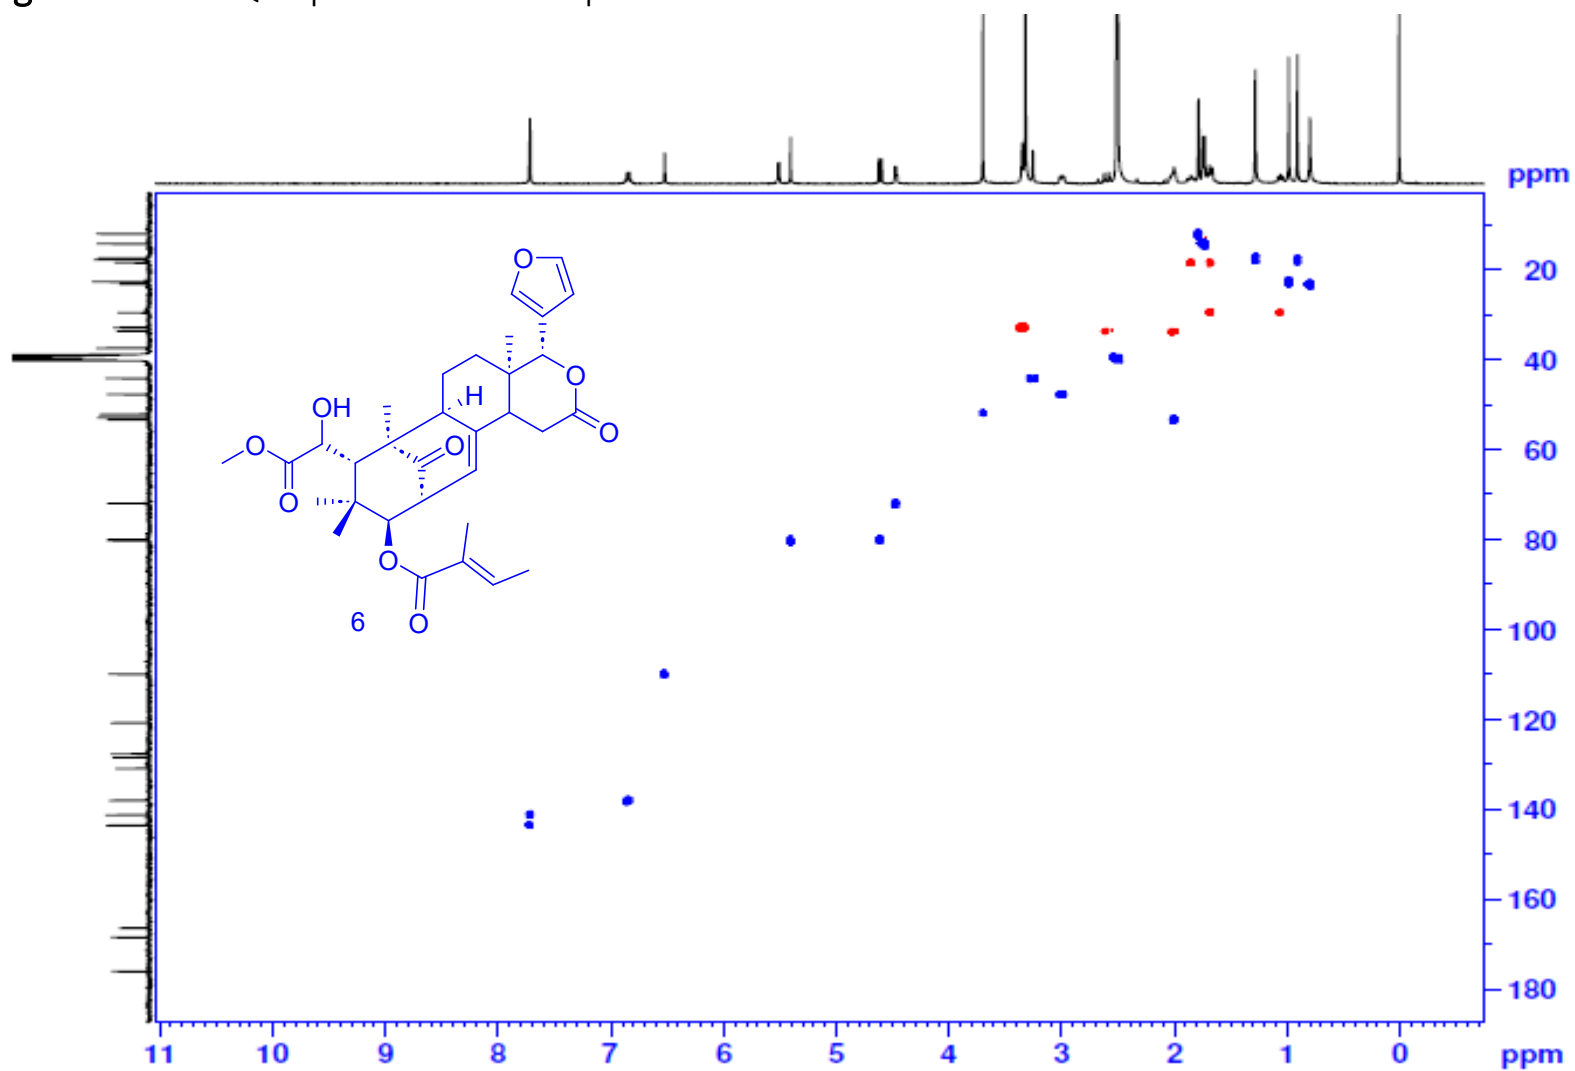

Figure S41. HMBC Spectrum of compound **6** in DMSO-*d*<sub>6</sub>

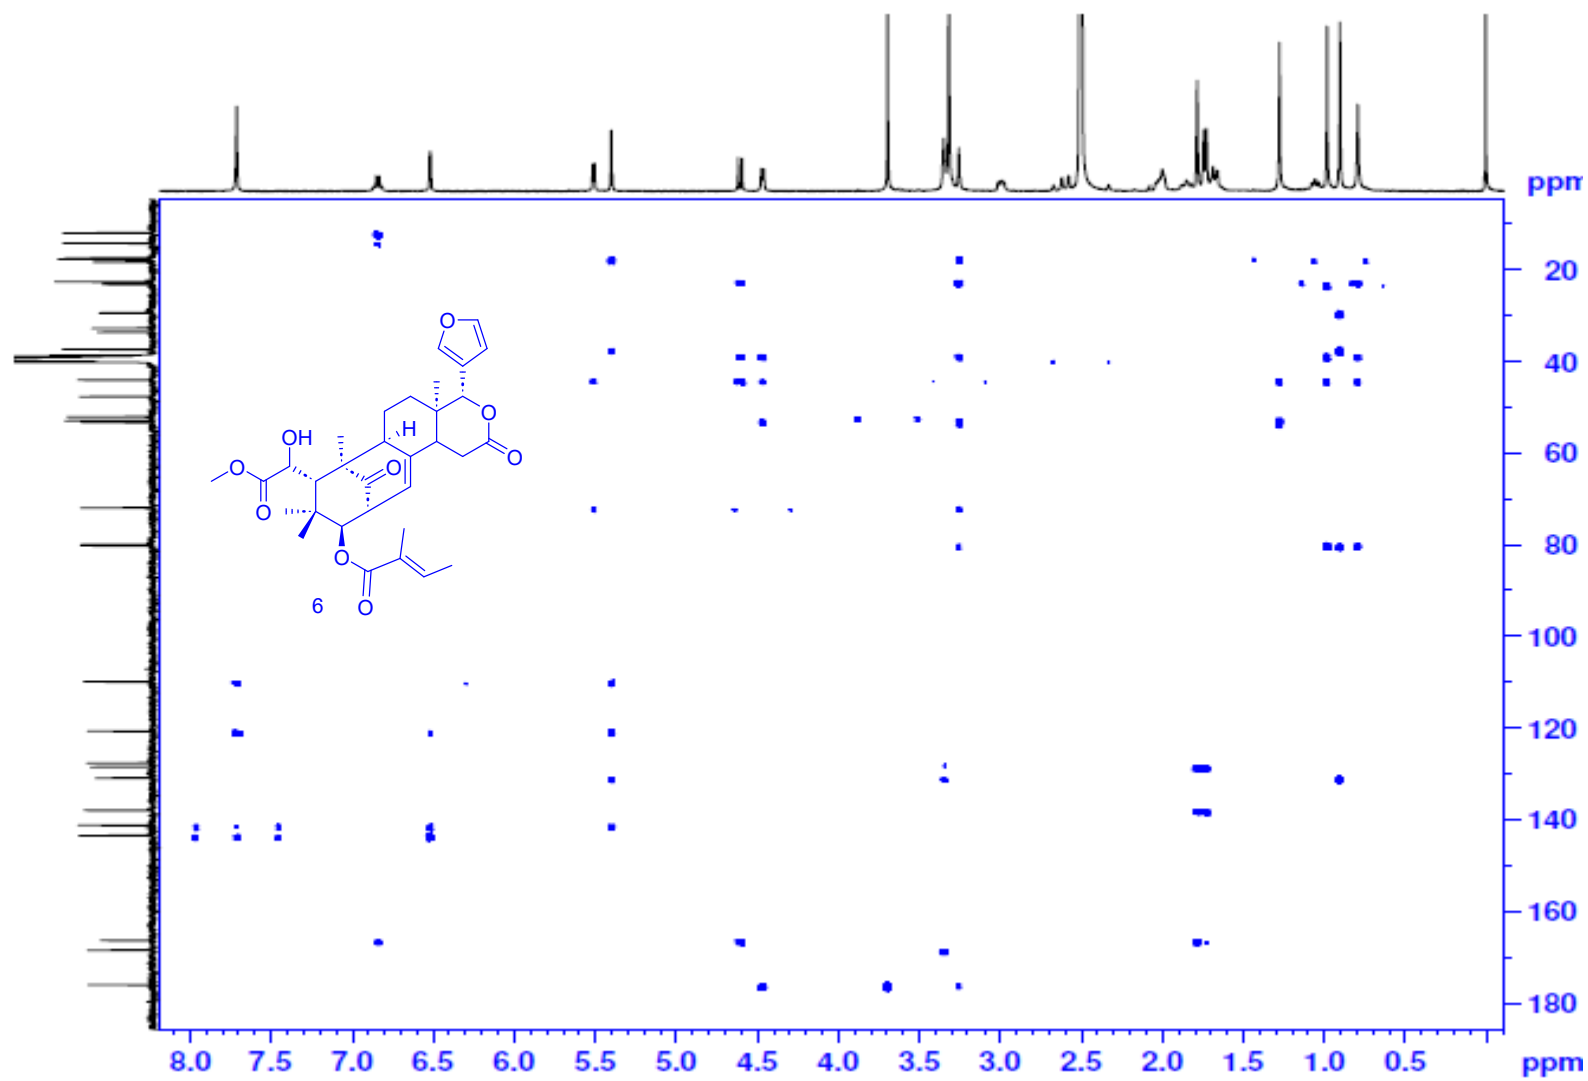



Figure S42. LCESI Mass Spectrum of compound 6

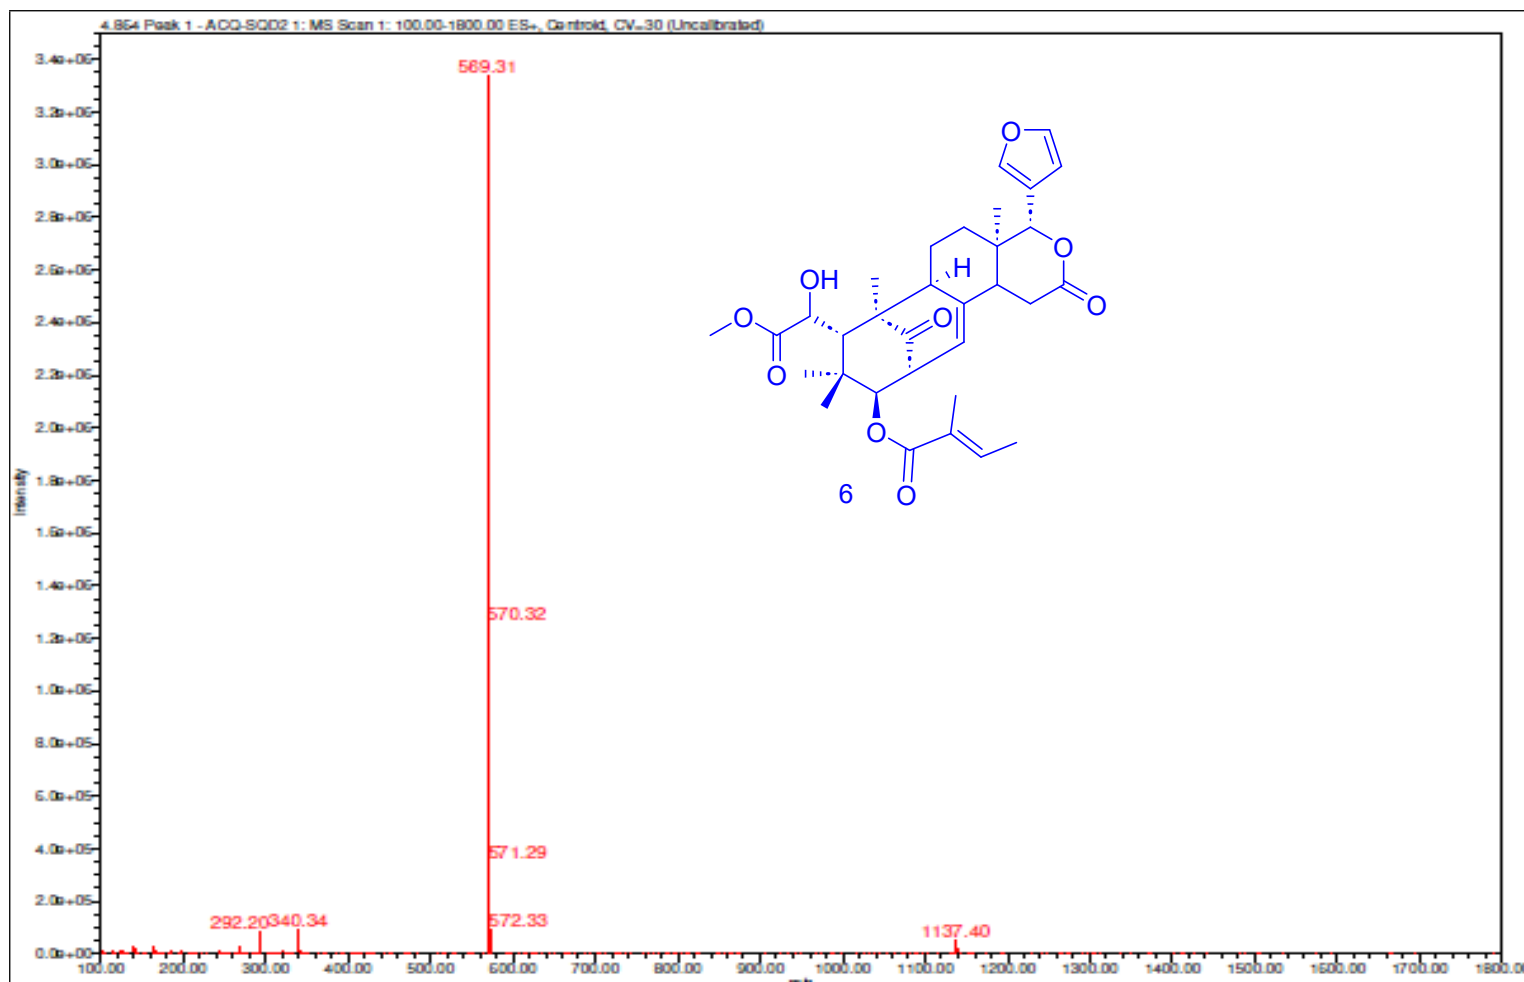

Figure S43. <sup>1</sup>H NMR Spectrum of compound **7** at (400 MHz) in DMSO-*d*<sub>6</sub>

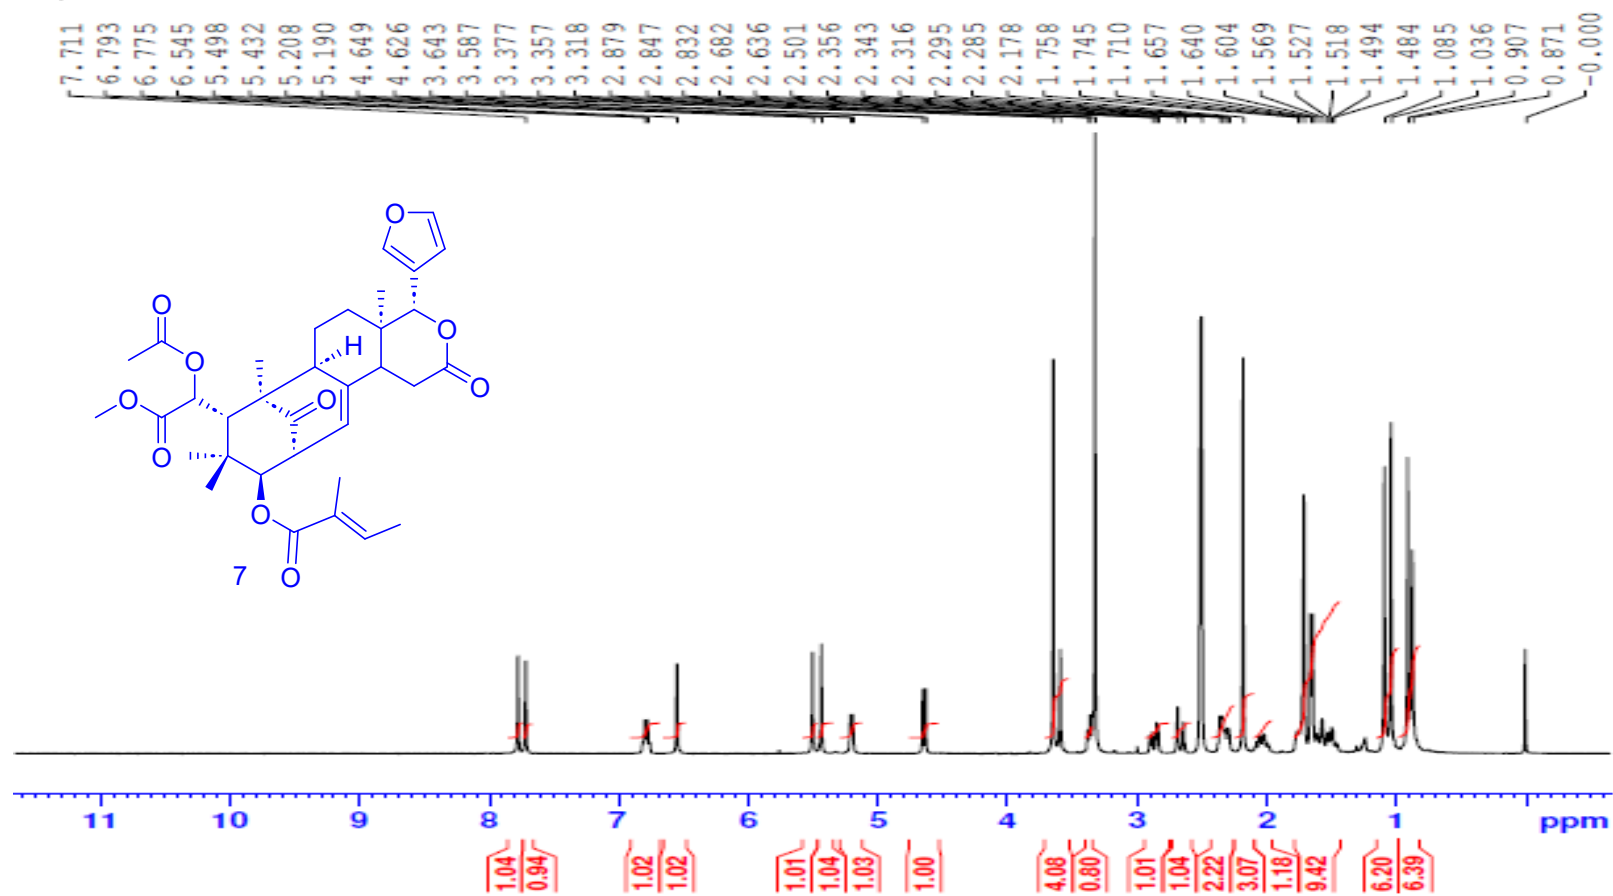

Figure S44.  $^{13}\text{C}$  NMR Spectrum of compound **7** at (400 MHz) in  $\text{DMSO-}d_6$

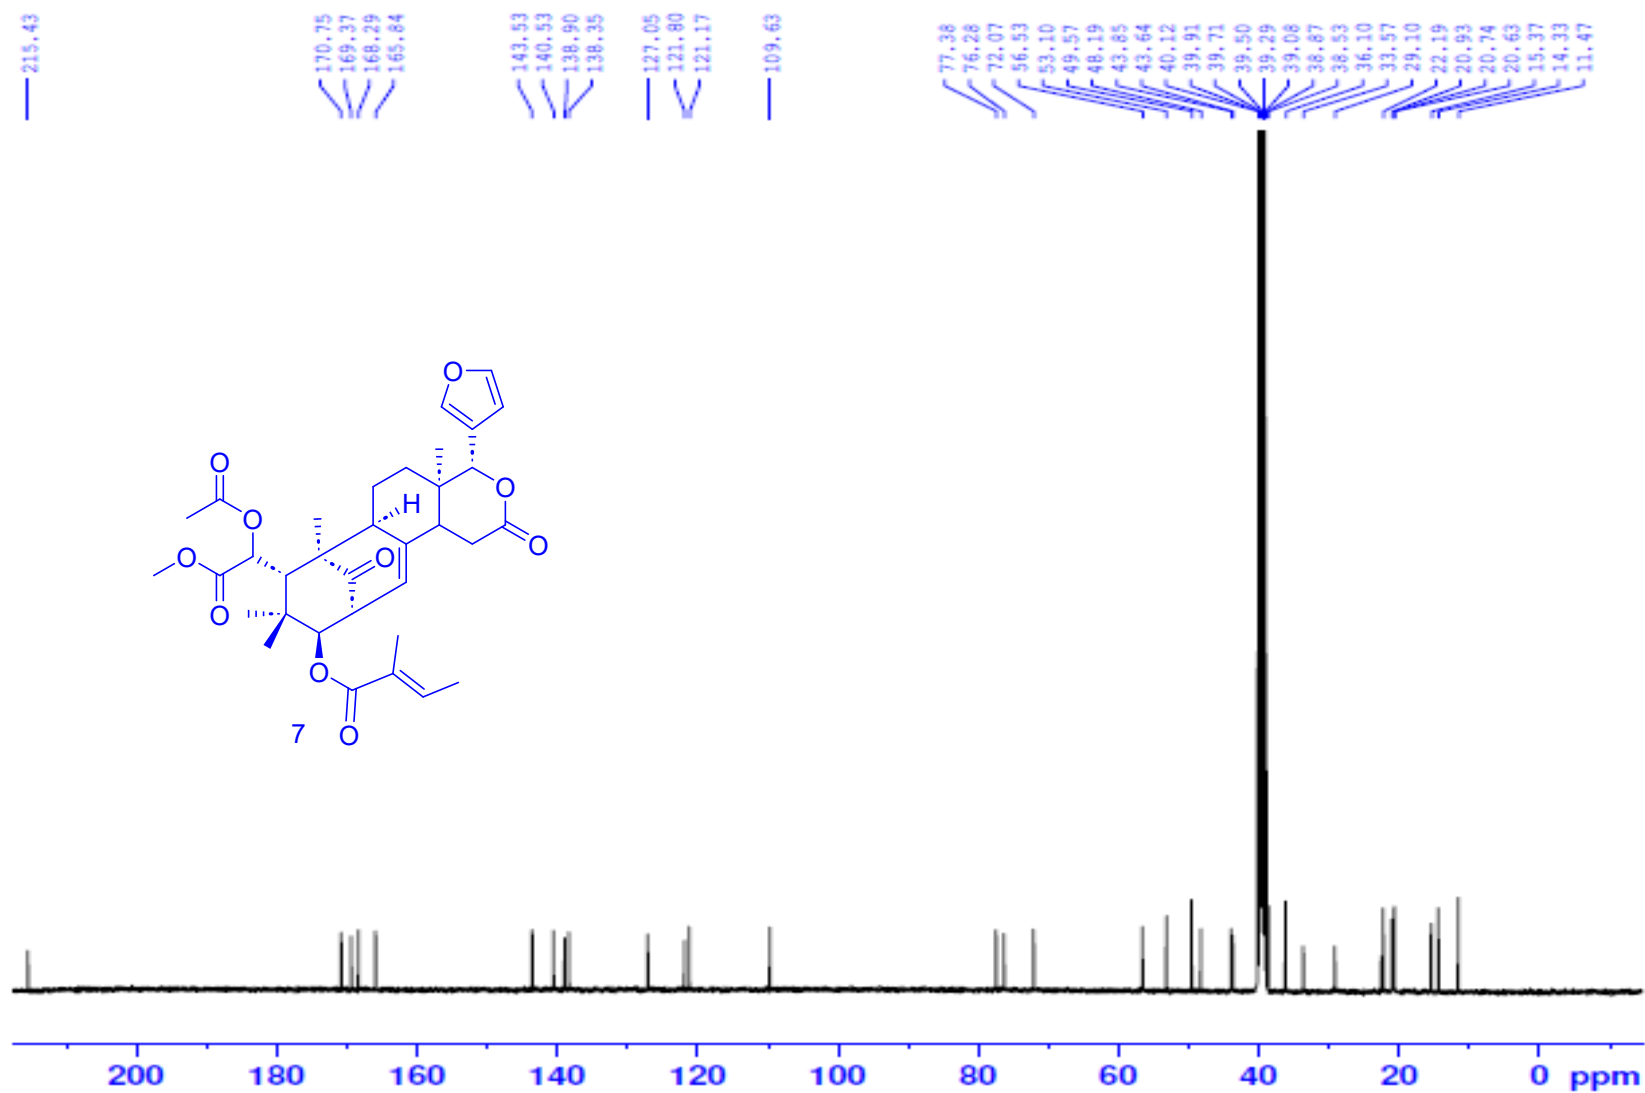

Figure S45. HSQC Spectrum of compound 7 in DMSO- *d*6

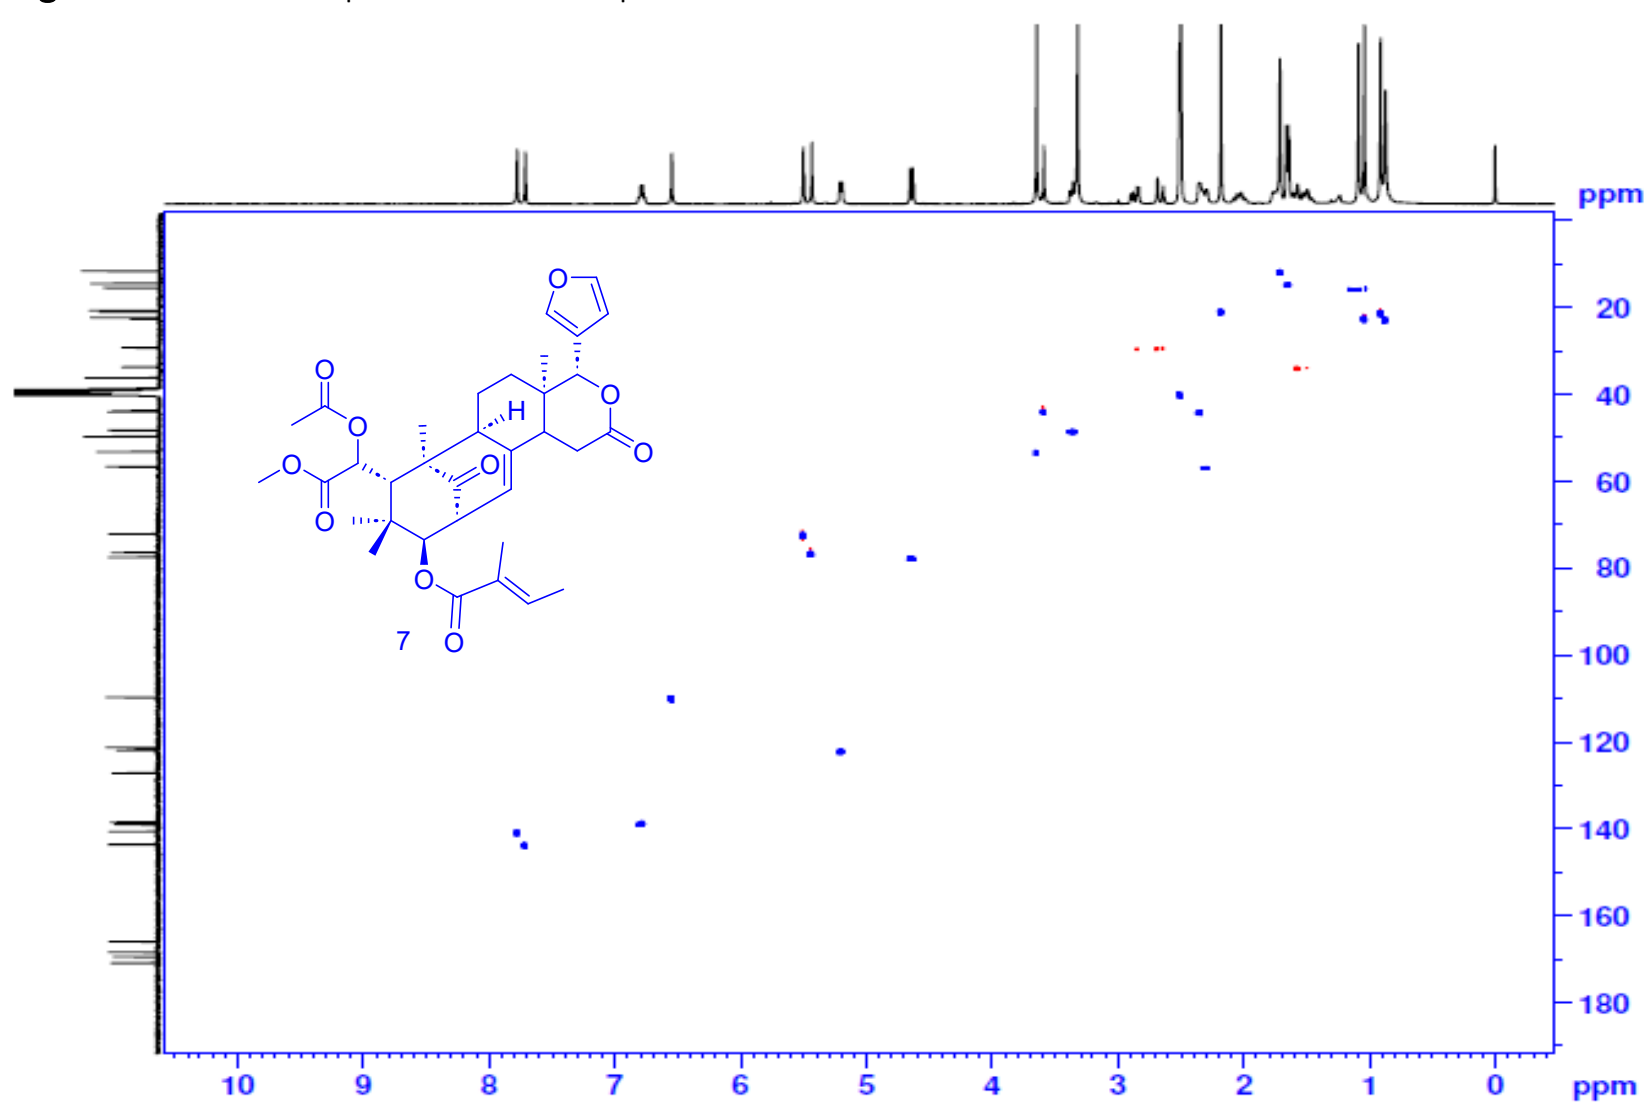

Figure S46. HMBC Spectrum of compound 7 in DMSO-*d*<sub>6</sub>

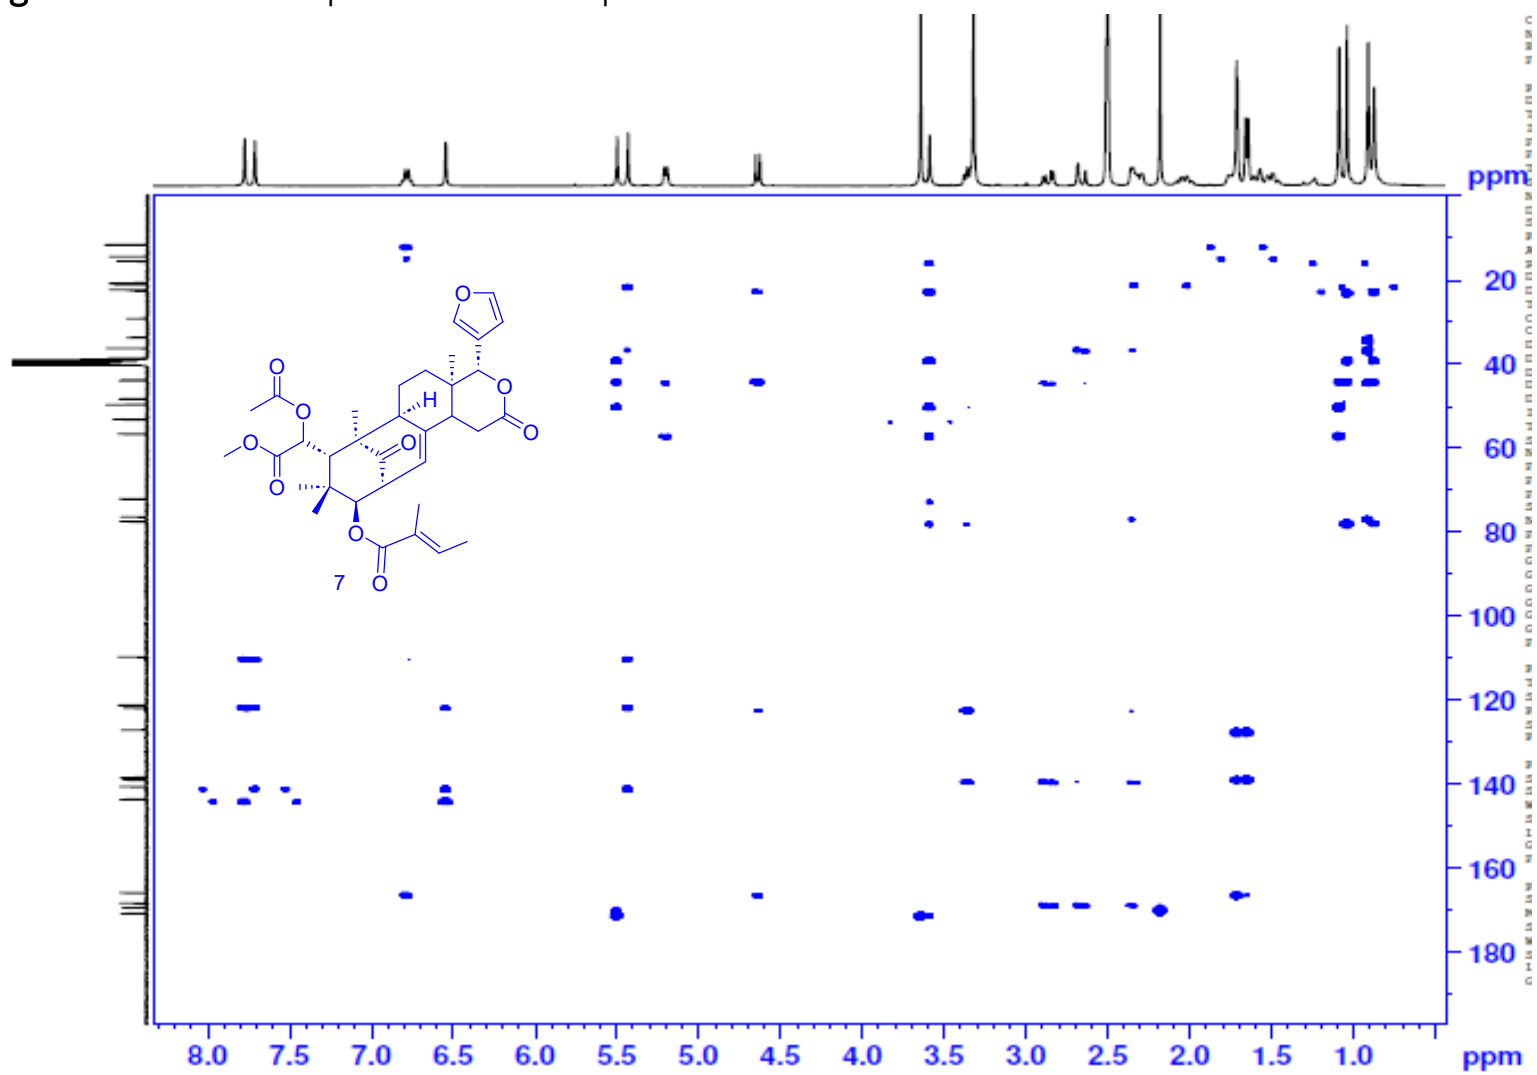

Figure S47. HRMS-ESI Mass Spectrum of compound 7

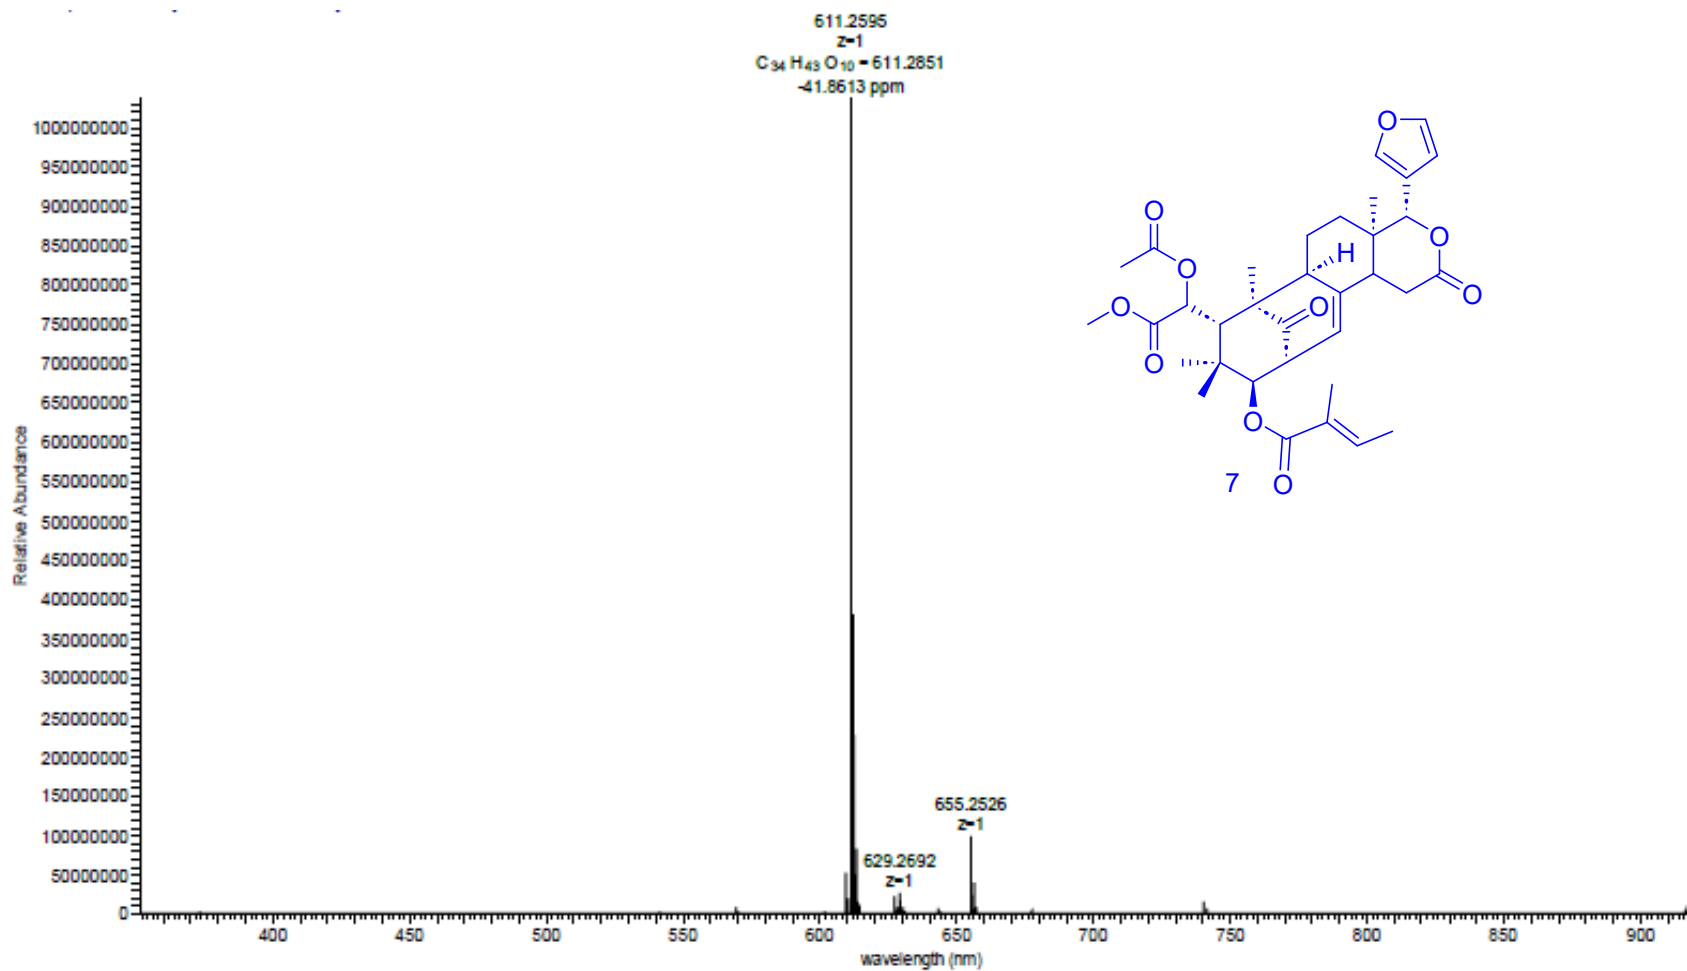

Figure S48. <sup>1</sup>H NMR Spectrum of compound **8** at (400 MHz) in DMSO-*d*<sub>6</sub>

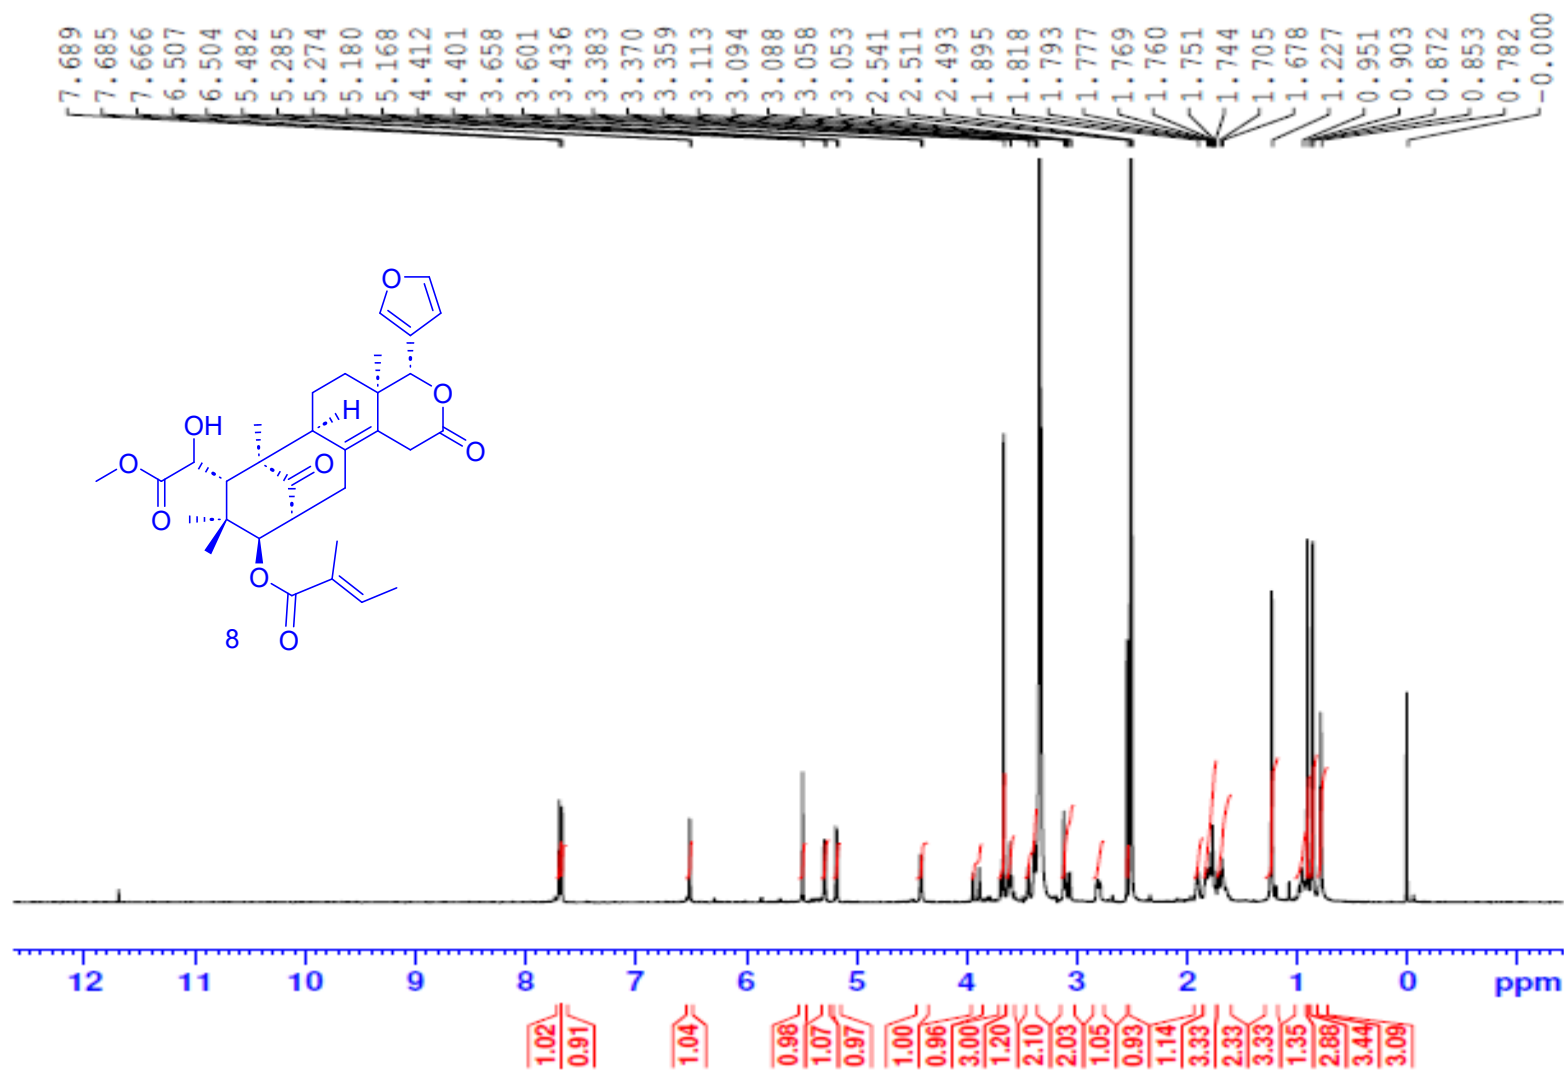

Figure S49. ESI LCMS spectrum of compound 8

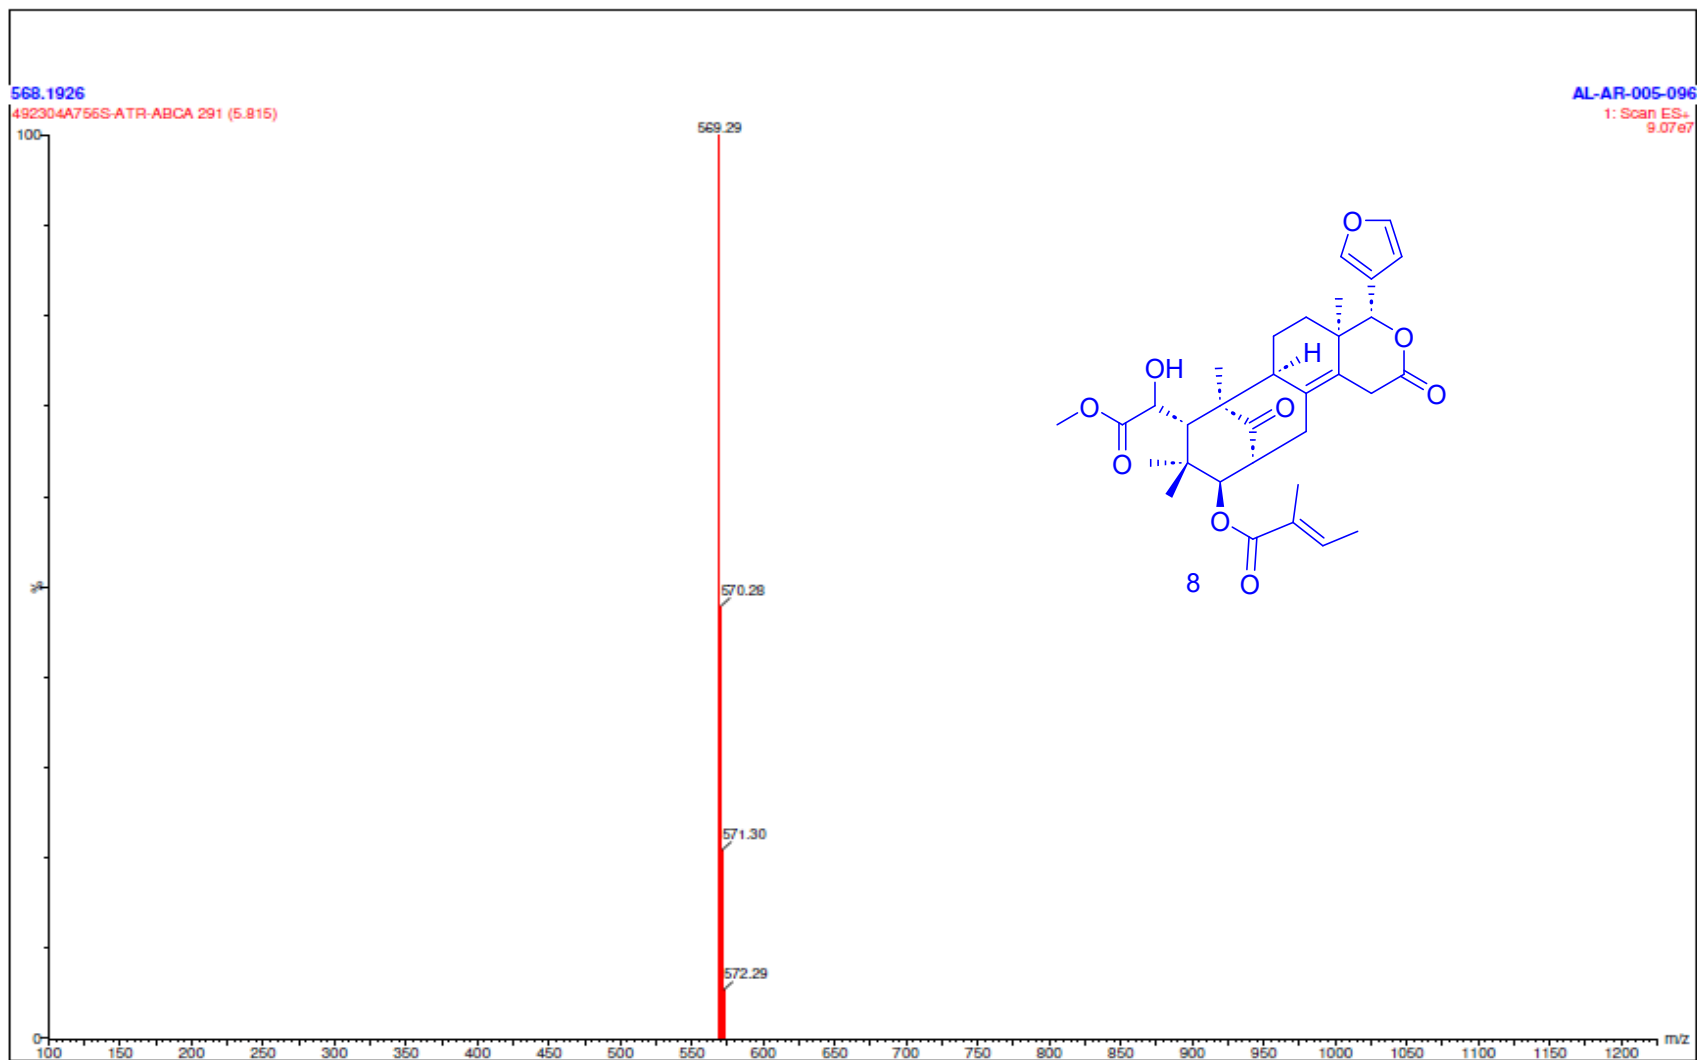



Figure S50.  $^1\text{H}$  NMR Spectrum of compound **9** at (400 MHz) in  $\text{DMSO-}d_6$

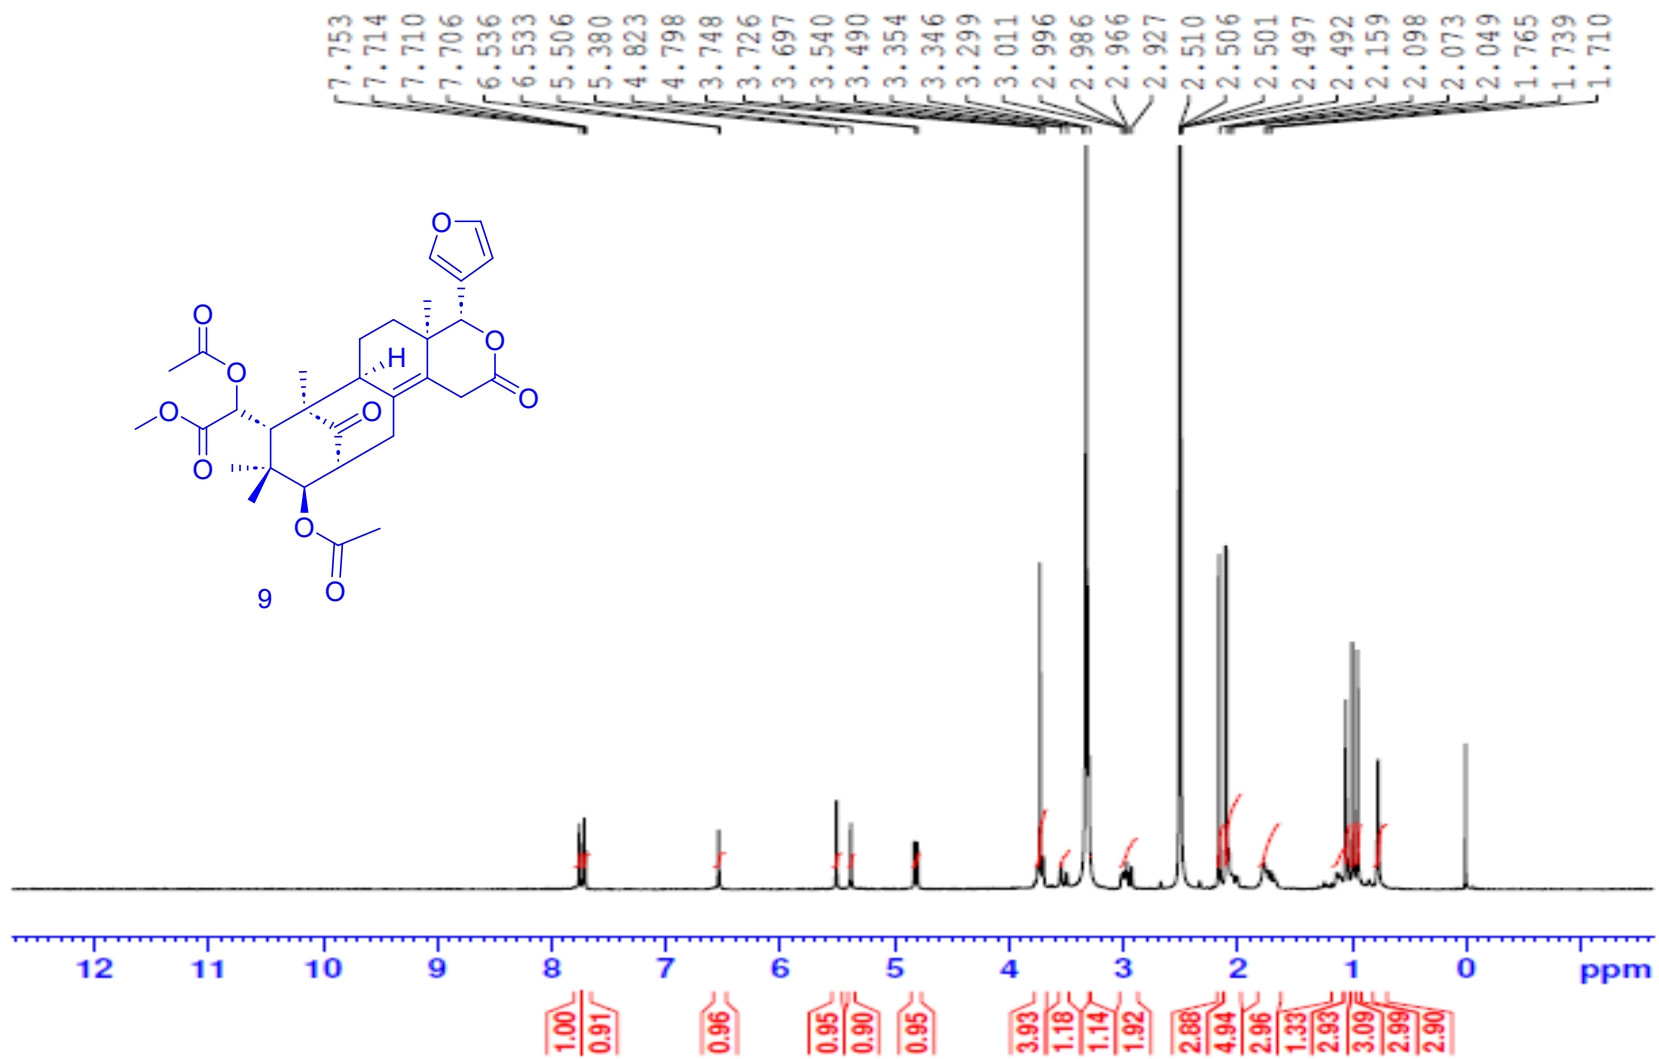

Figure S51.  $^{13}\text{C}$  NMR Spectrum of compound **9** at (400 MHz) in  $\text{DMSO-}d_6$

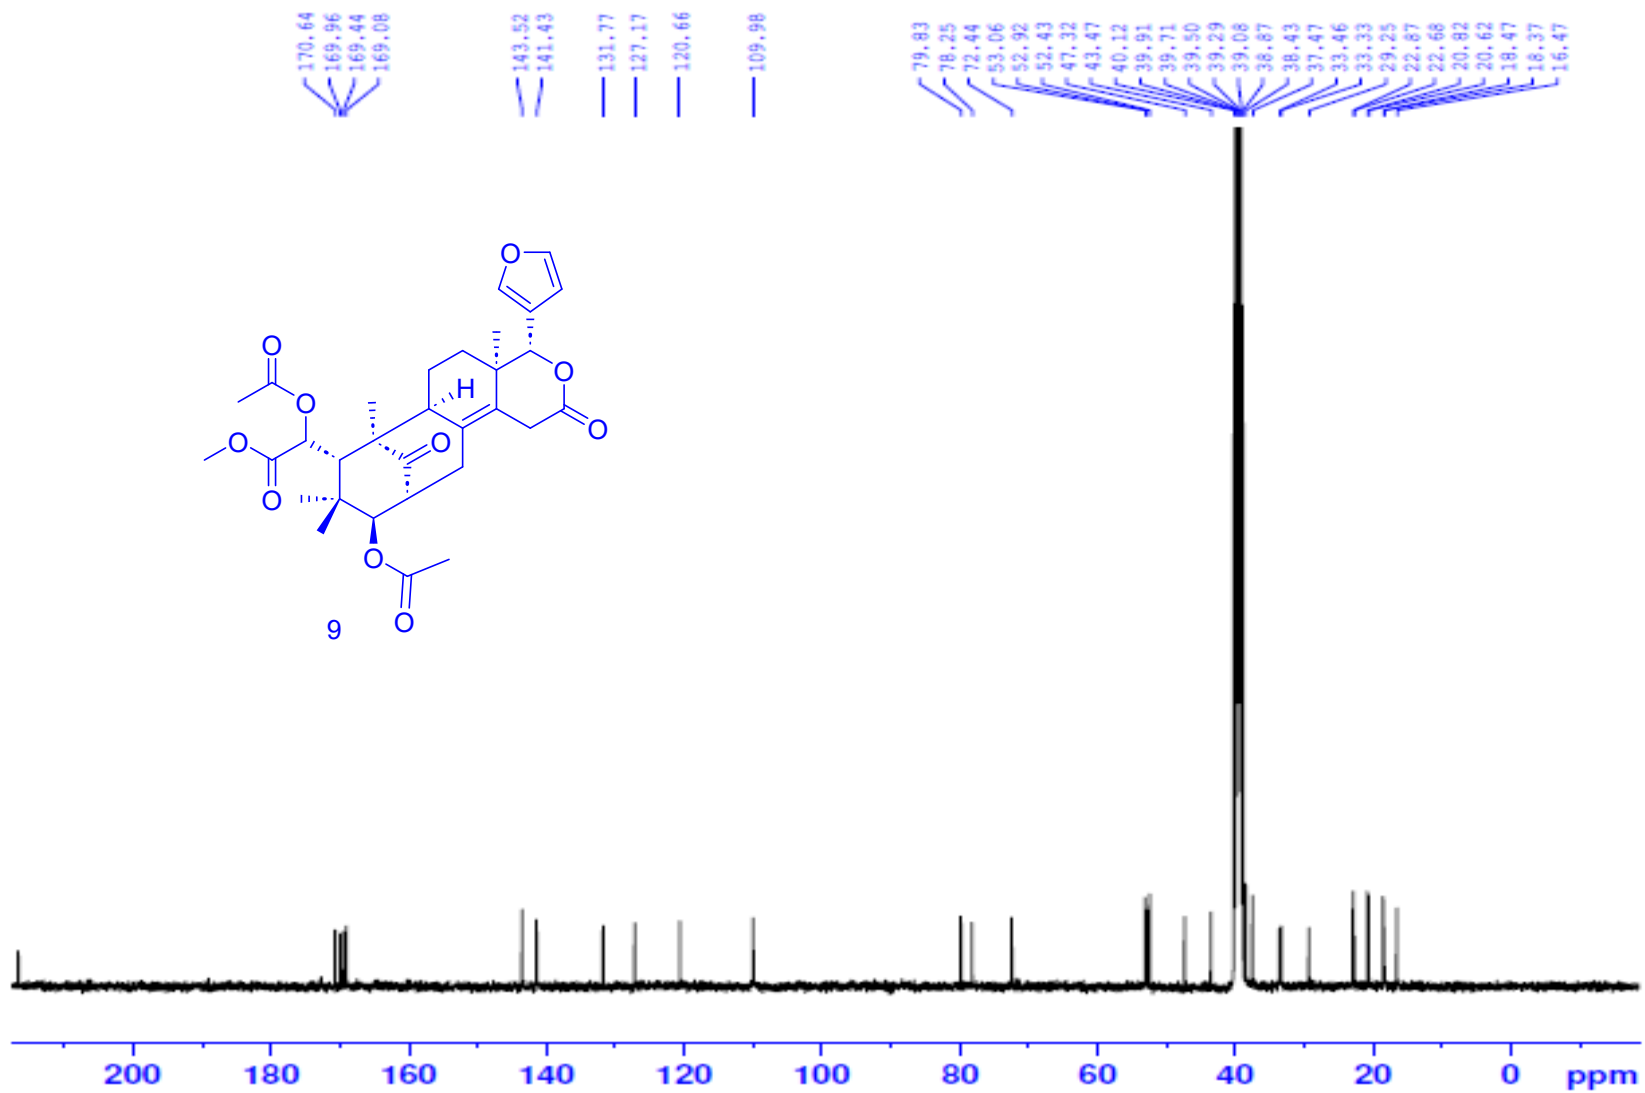

Figure S52. HSQC Spectrum of compound 9 in DMSO-*d*6

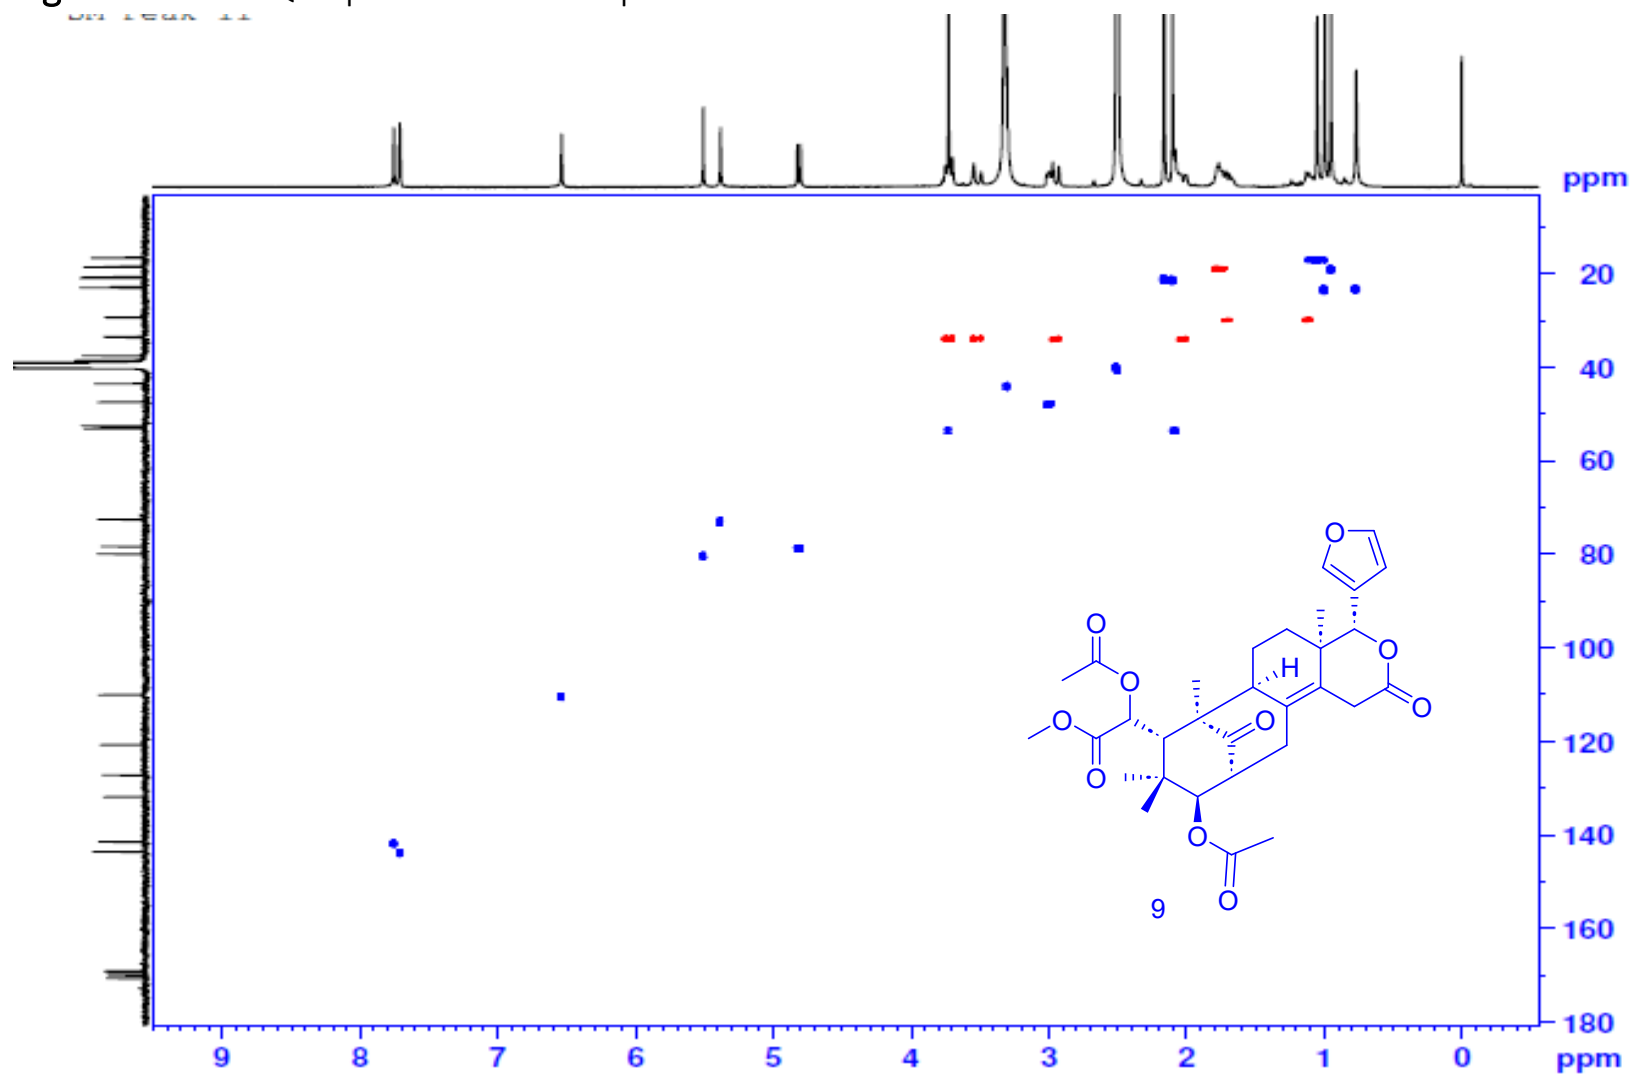

Figure S53. HMBC Spectrum of compound 9 in DMSO- d6

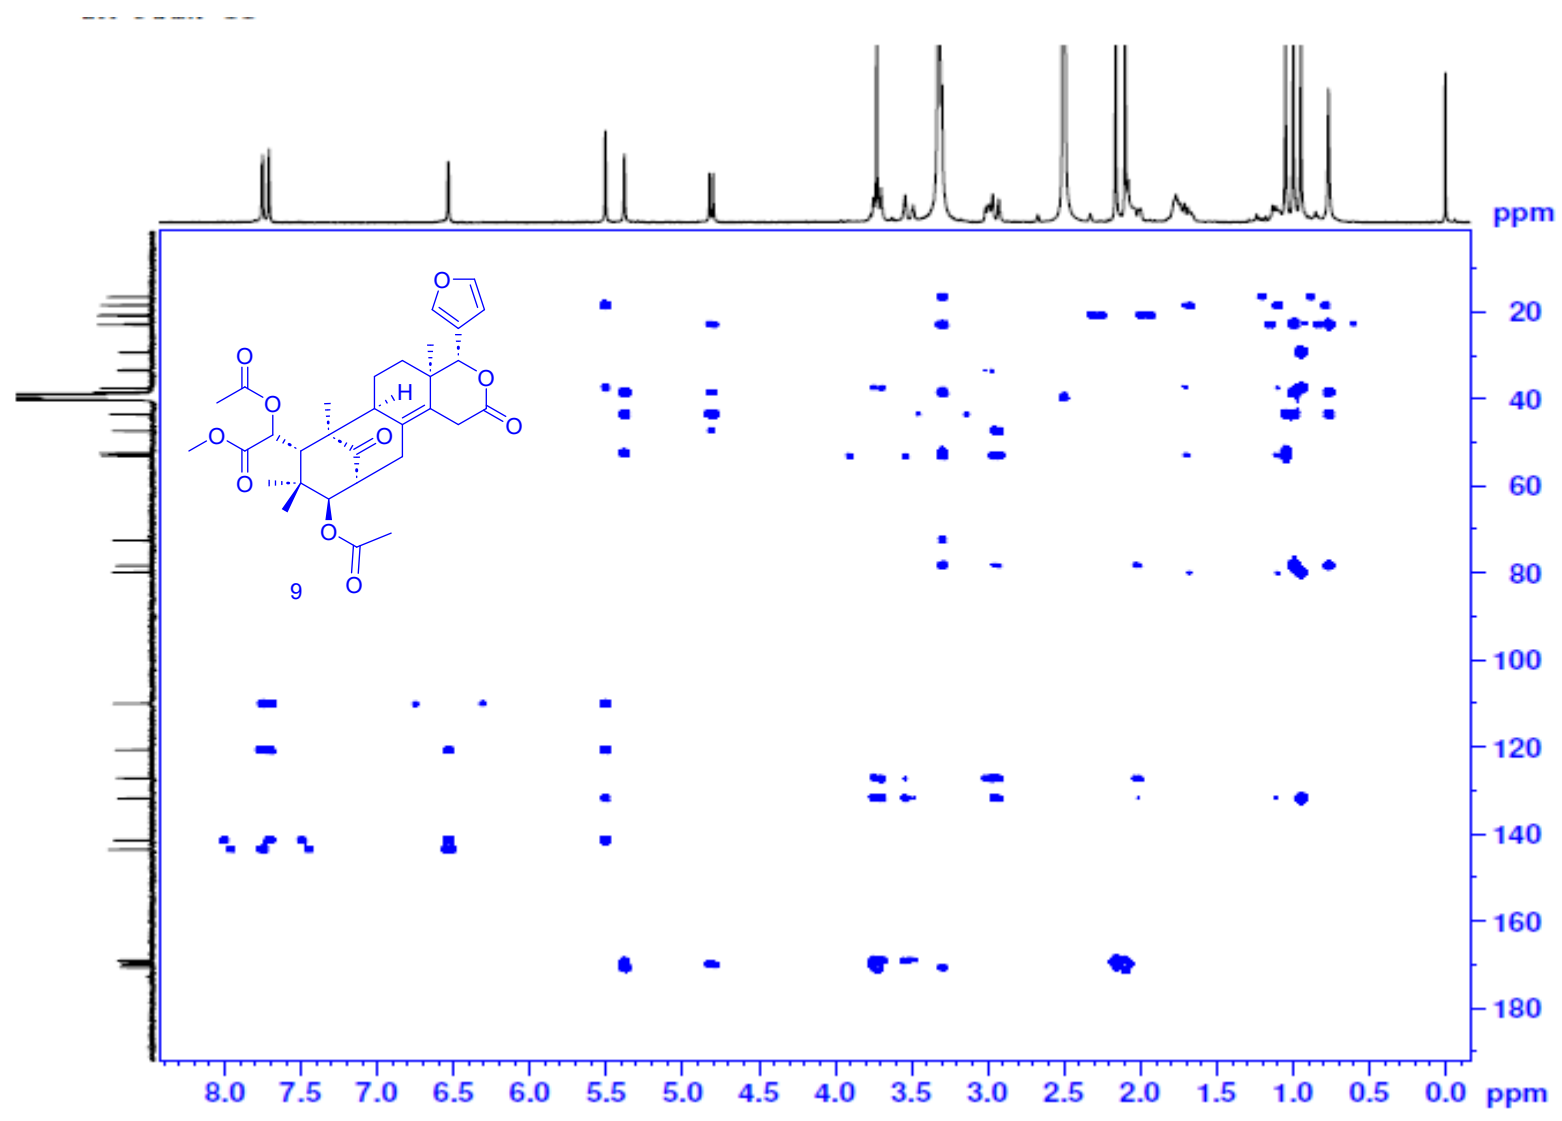



Figure S55.  $^1\text{H}$  NMR Spectrum of compound **10** at (400 MHz) in DMSO- $d_6$

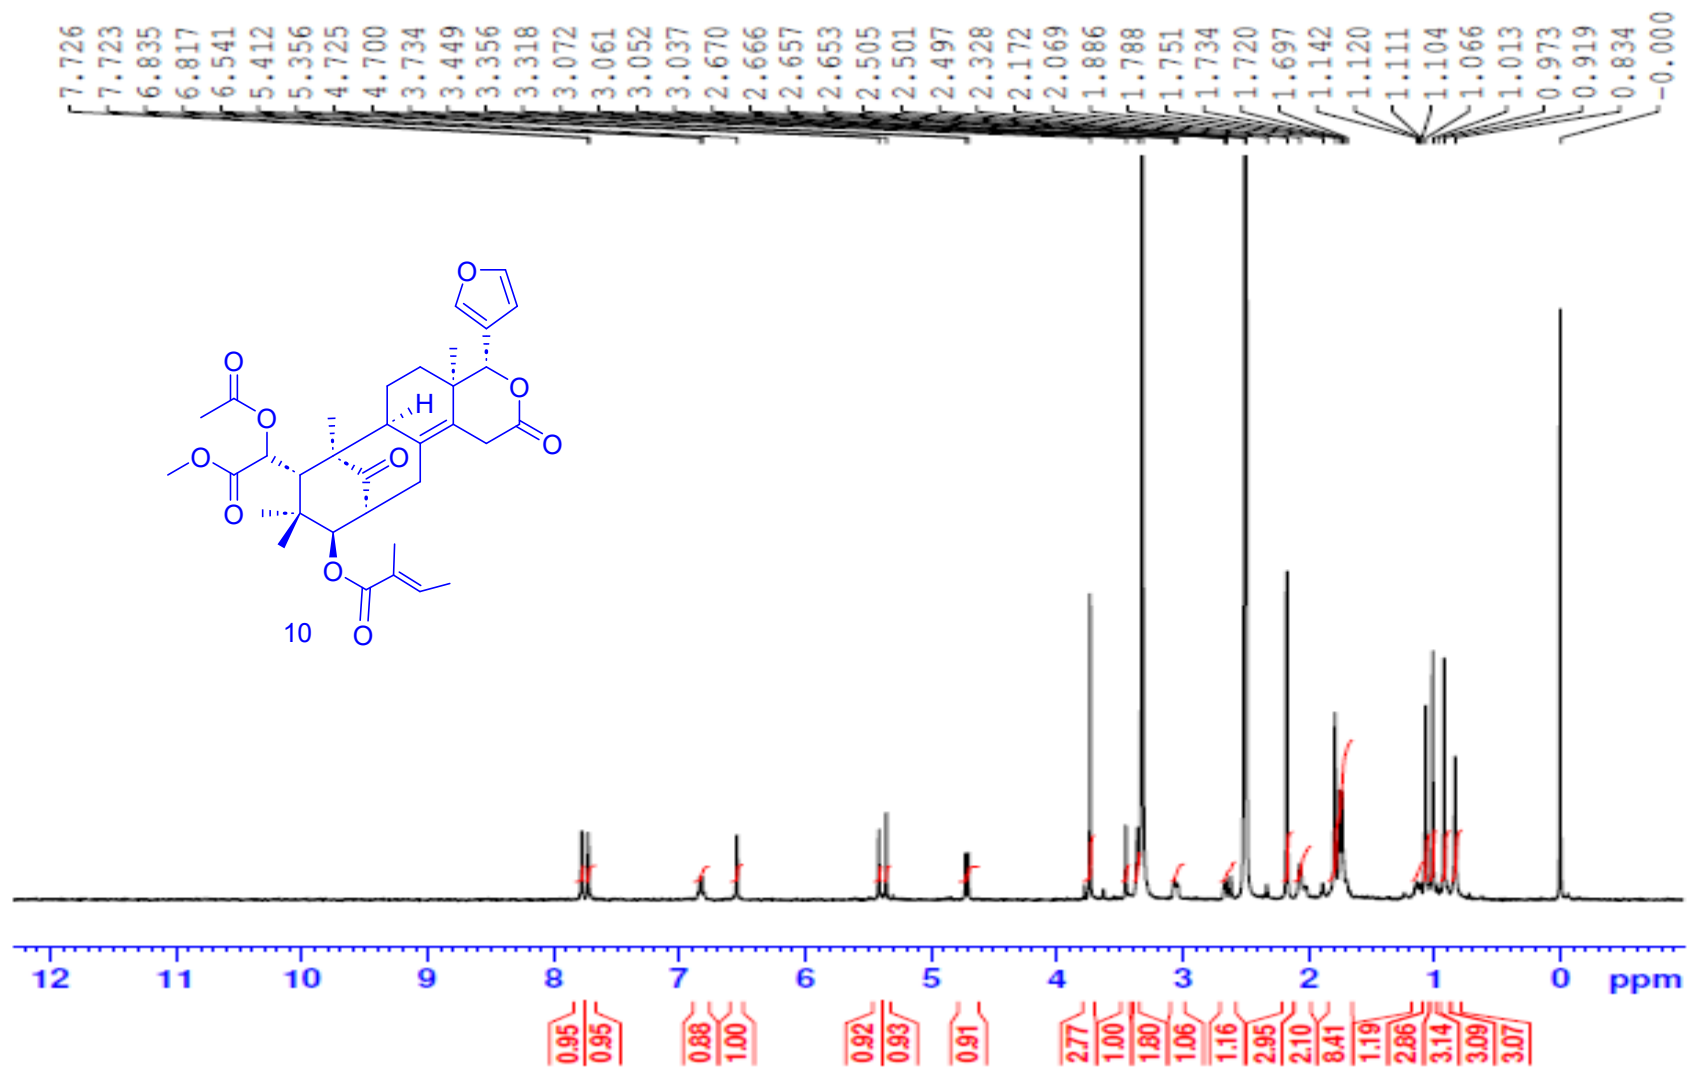

Figure S56.  $^{13}\text{C}$  NMR Spectrum of compound **10** at (400 MHz) in DMSO- $d_6$

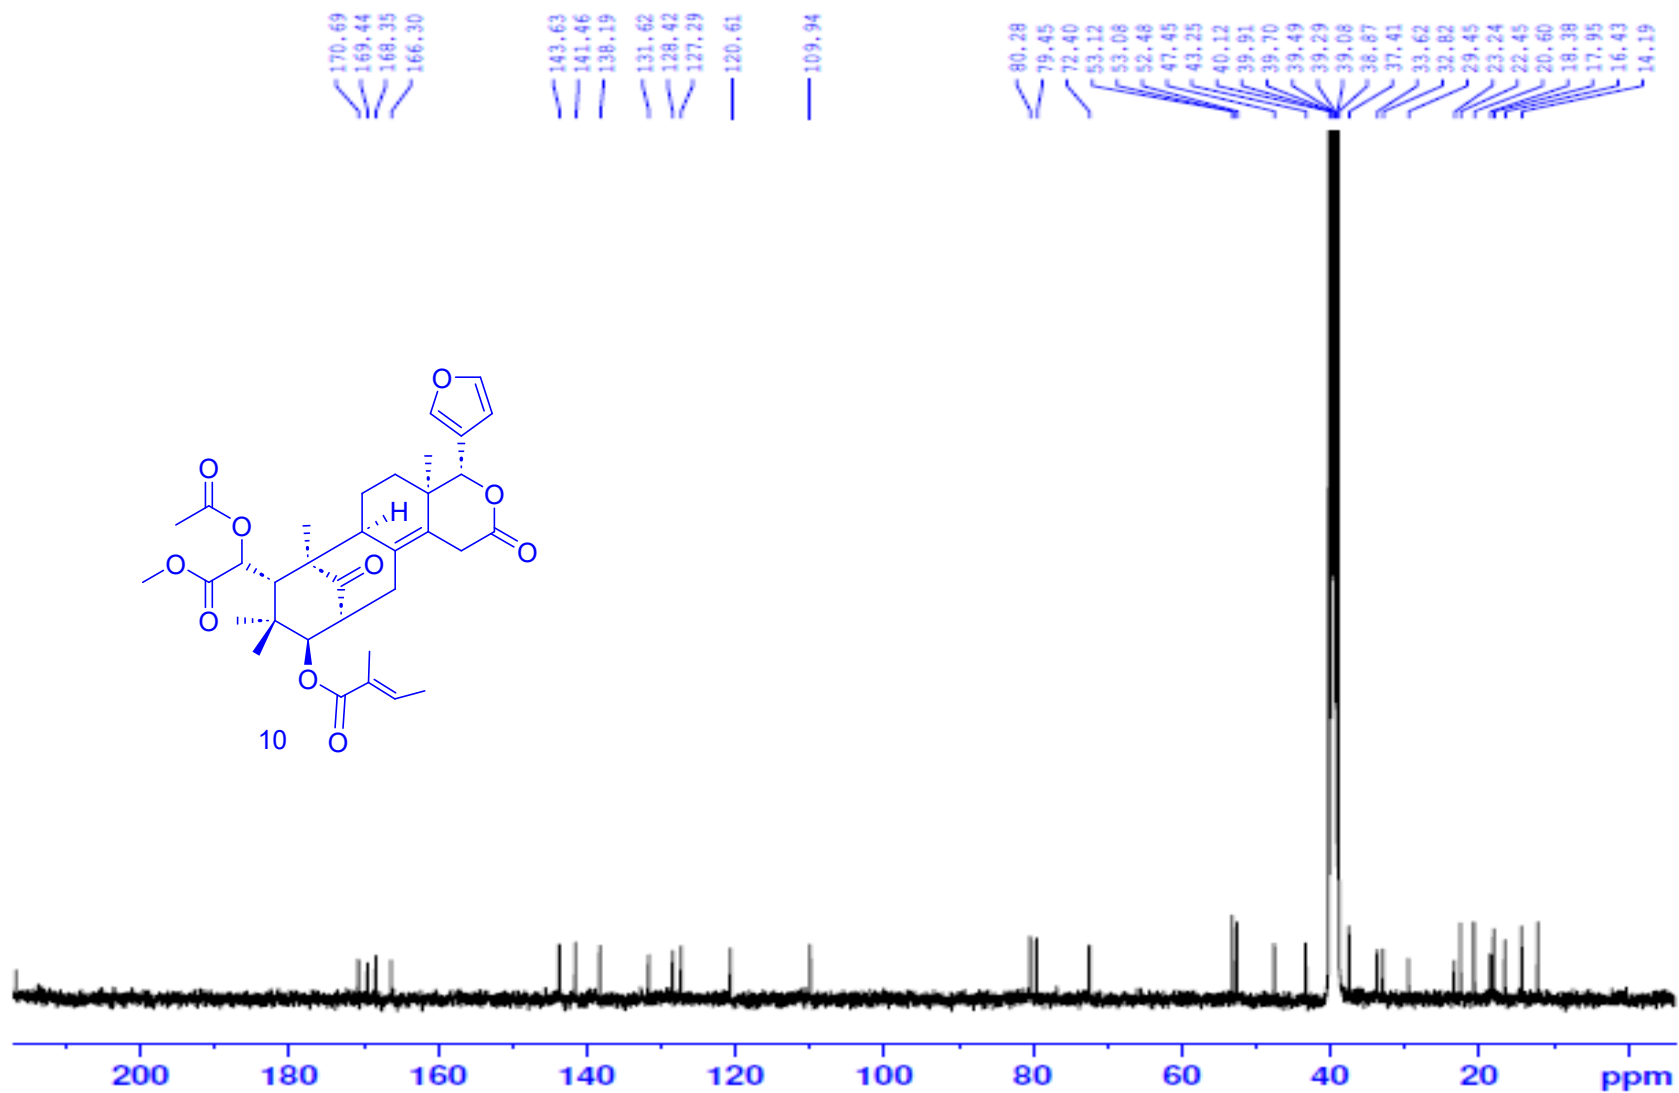

Figure S57. HSQC Spectrum of compound **10** in DMSO- d6

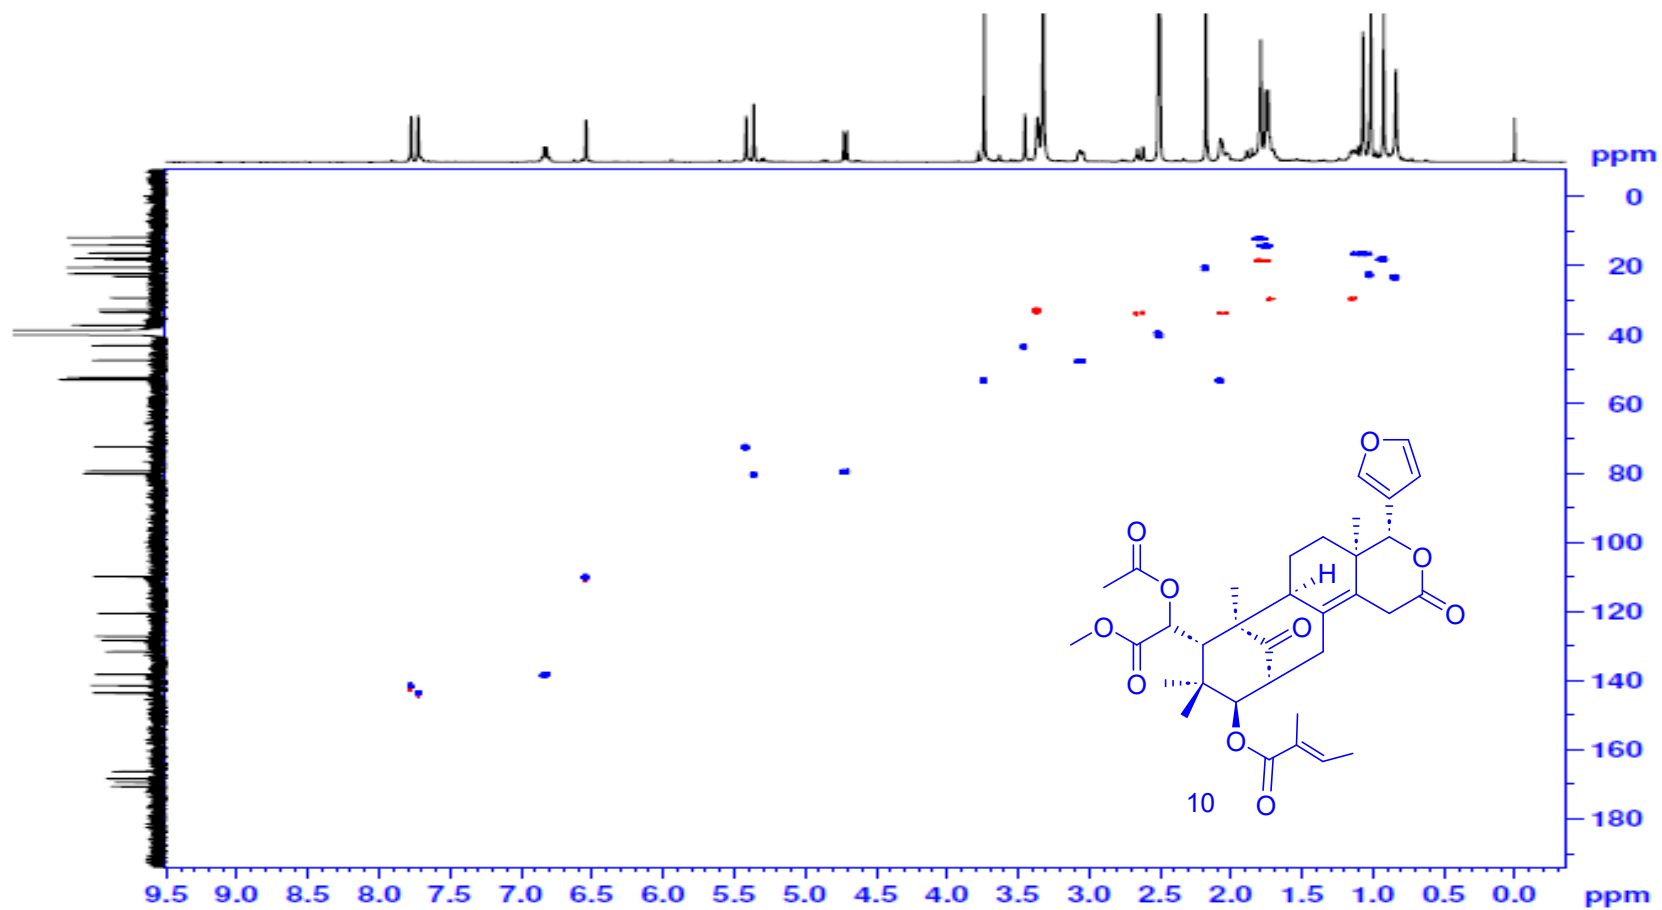



Figure S58. HMBC Spectrum of compound **10** in DMSO- d6

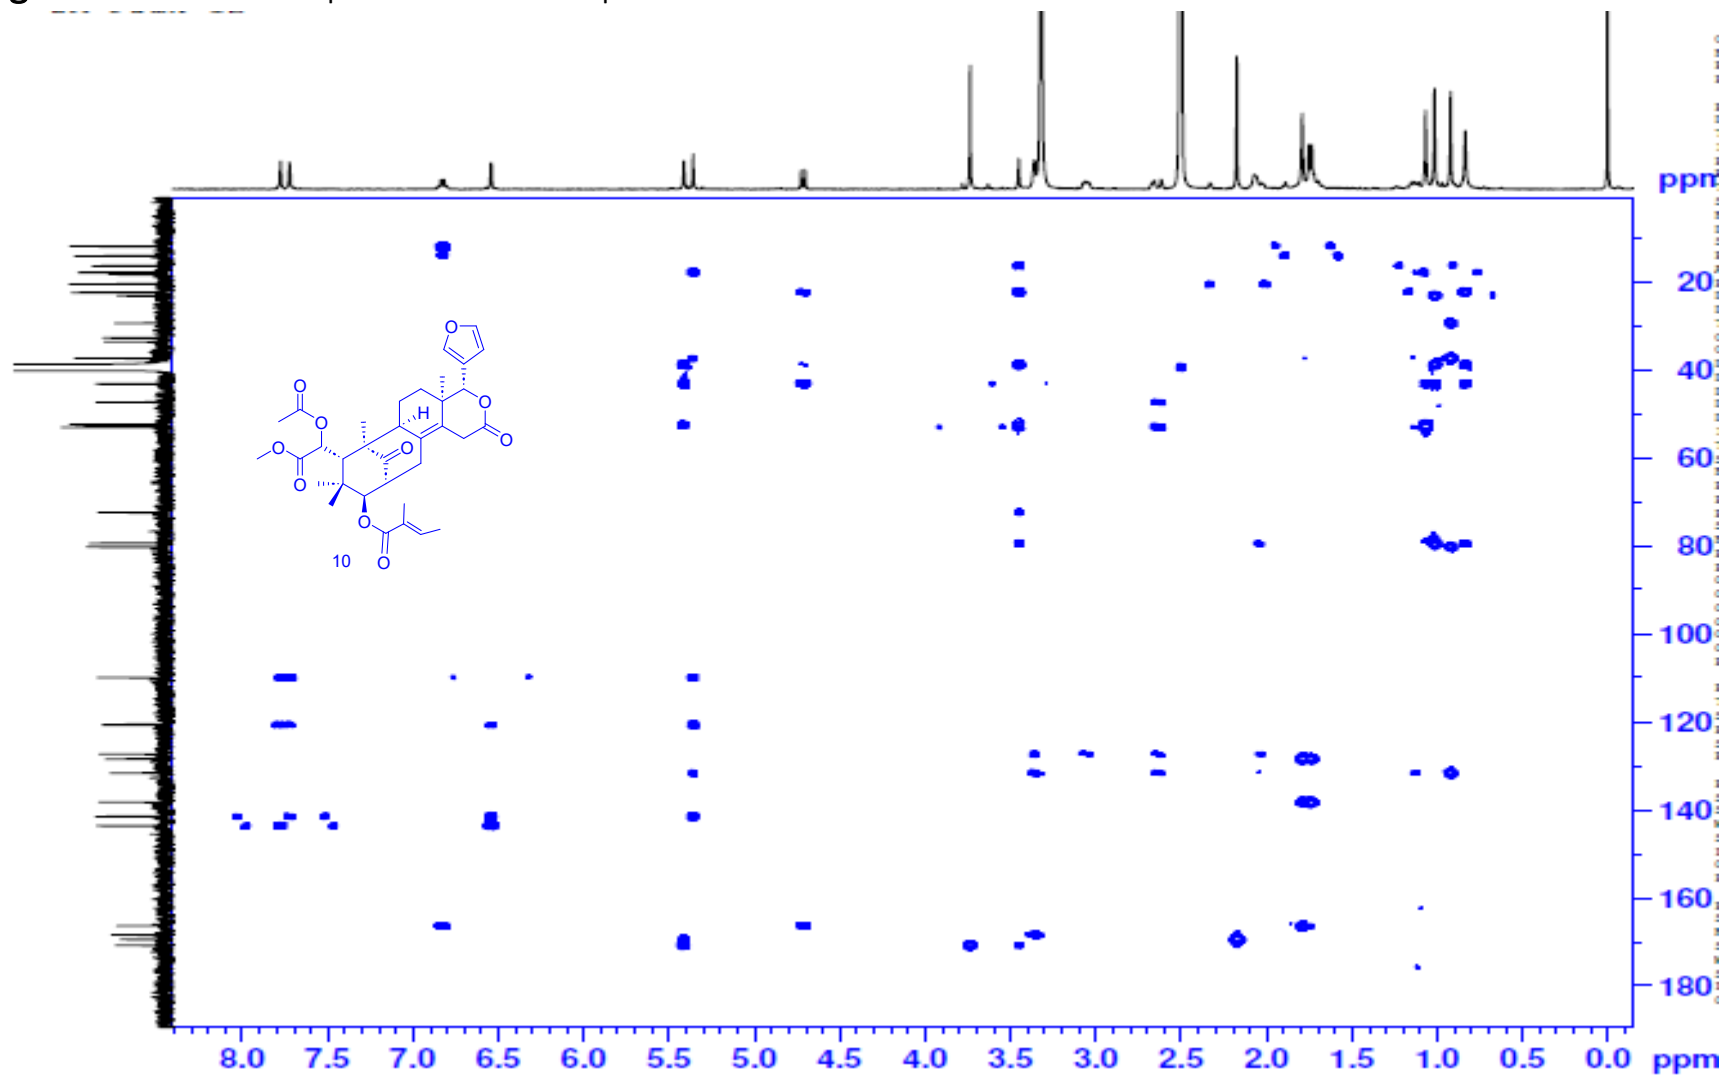

Figure S59. ESI LCMS Spectrum of compound 10

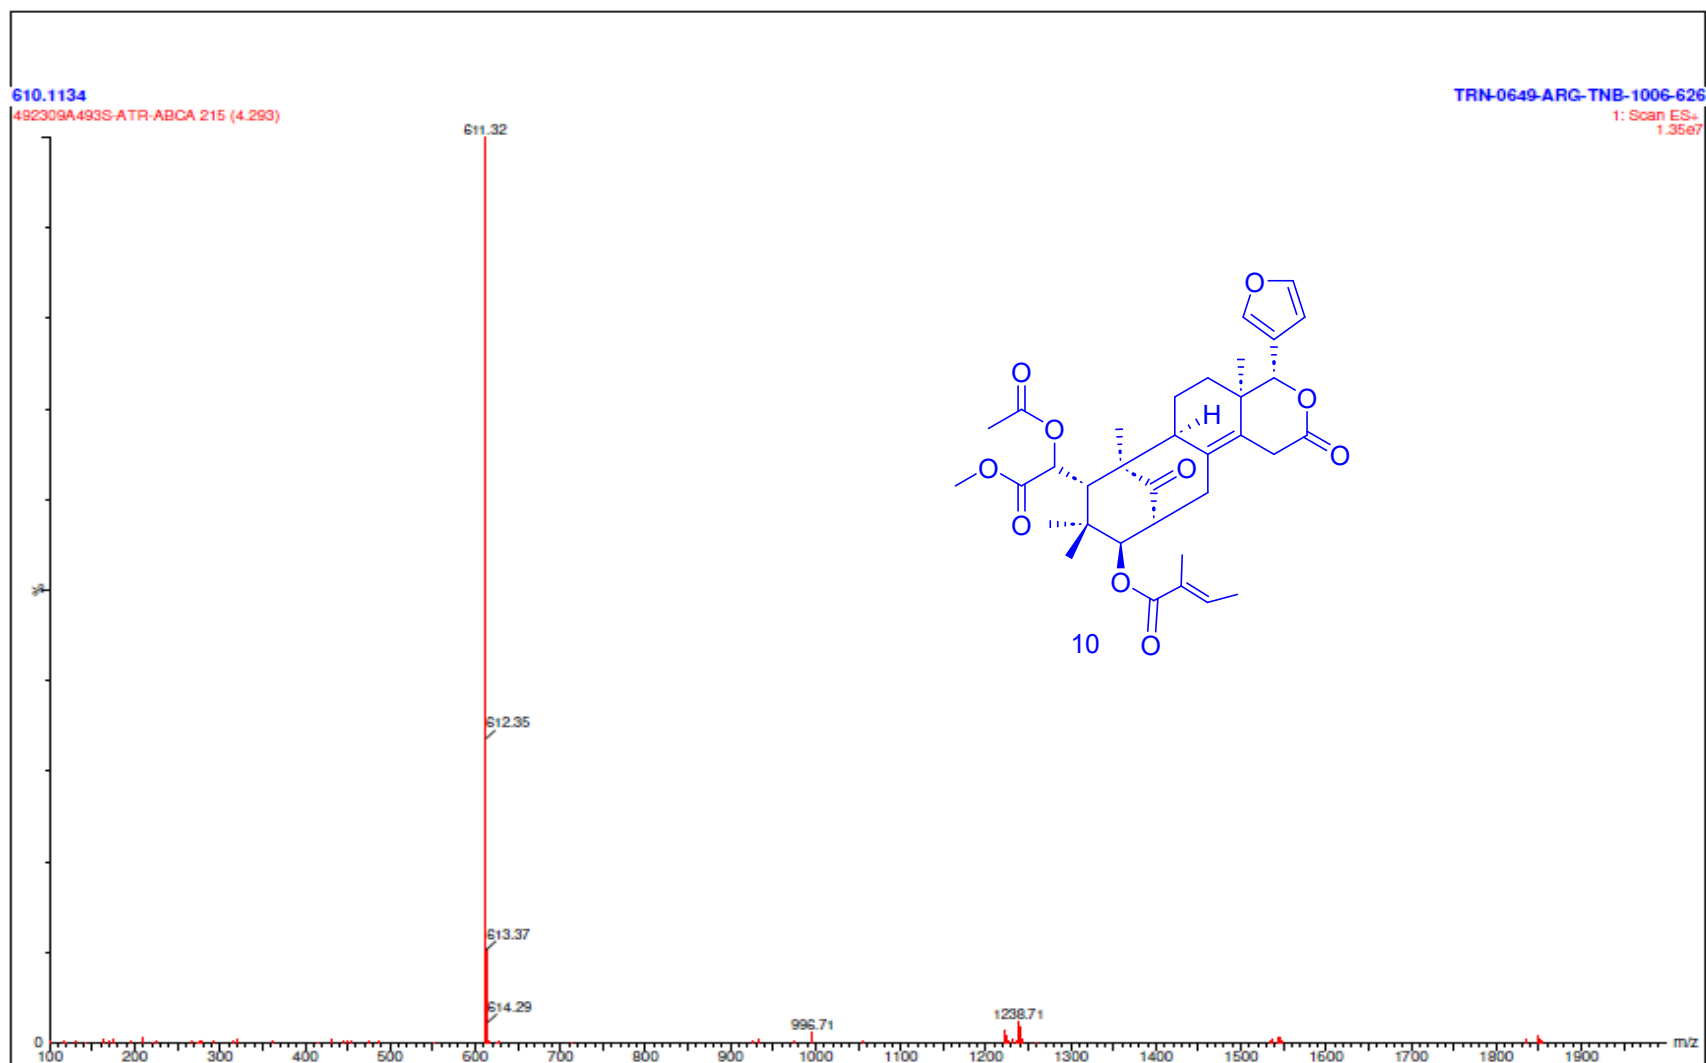

Figure S60. <sup>1</sup>H NMR Spectrum of compound **11** at (400 MHz) in DMSO- d<sub>6</sub>

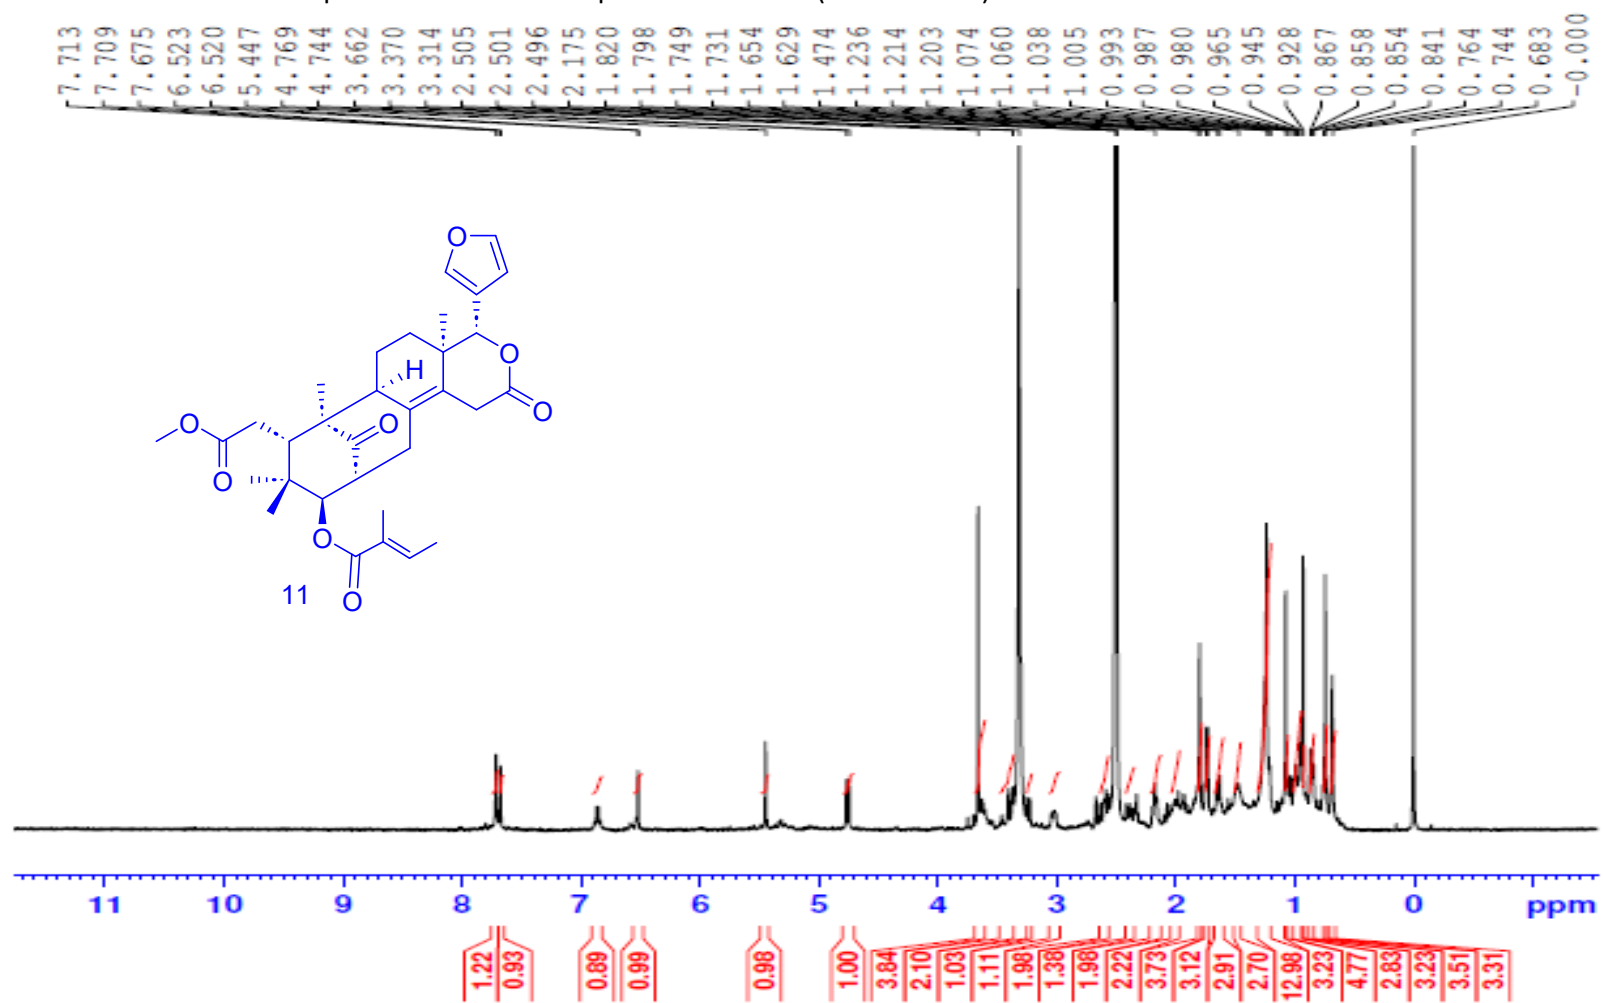

Figure S61.  $^{13}\text{C}$  NMR Spectrum of compound **11** at (400 MHz) in DMSO-  $d_6$

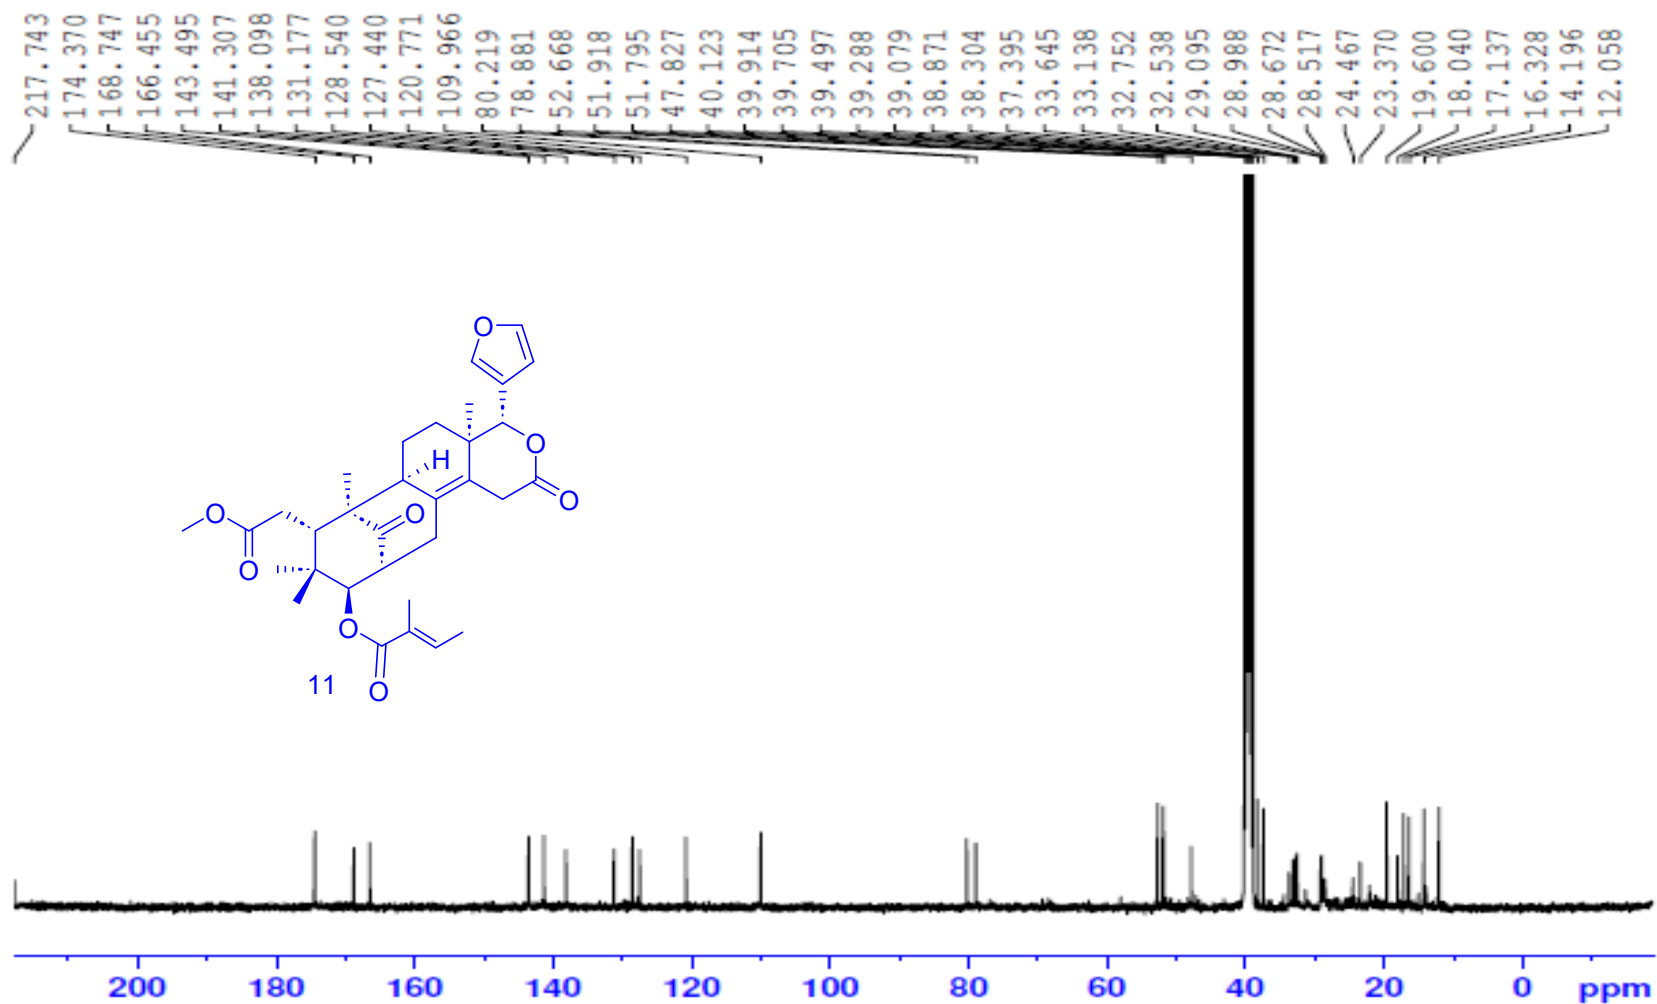

Figure S62. HSQC Spectrum of compound **11** in DMSO- d6

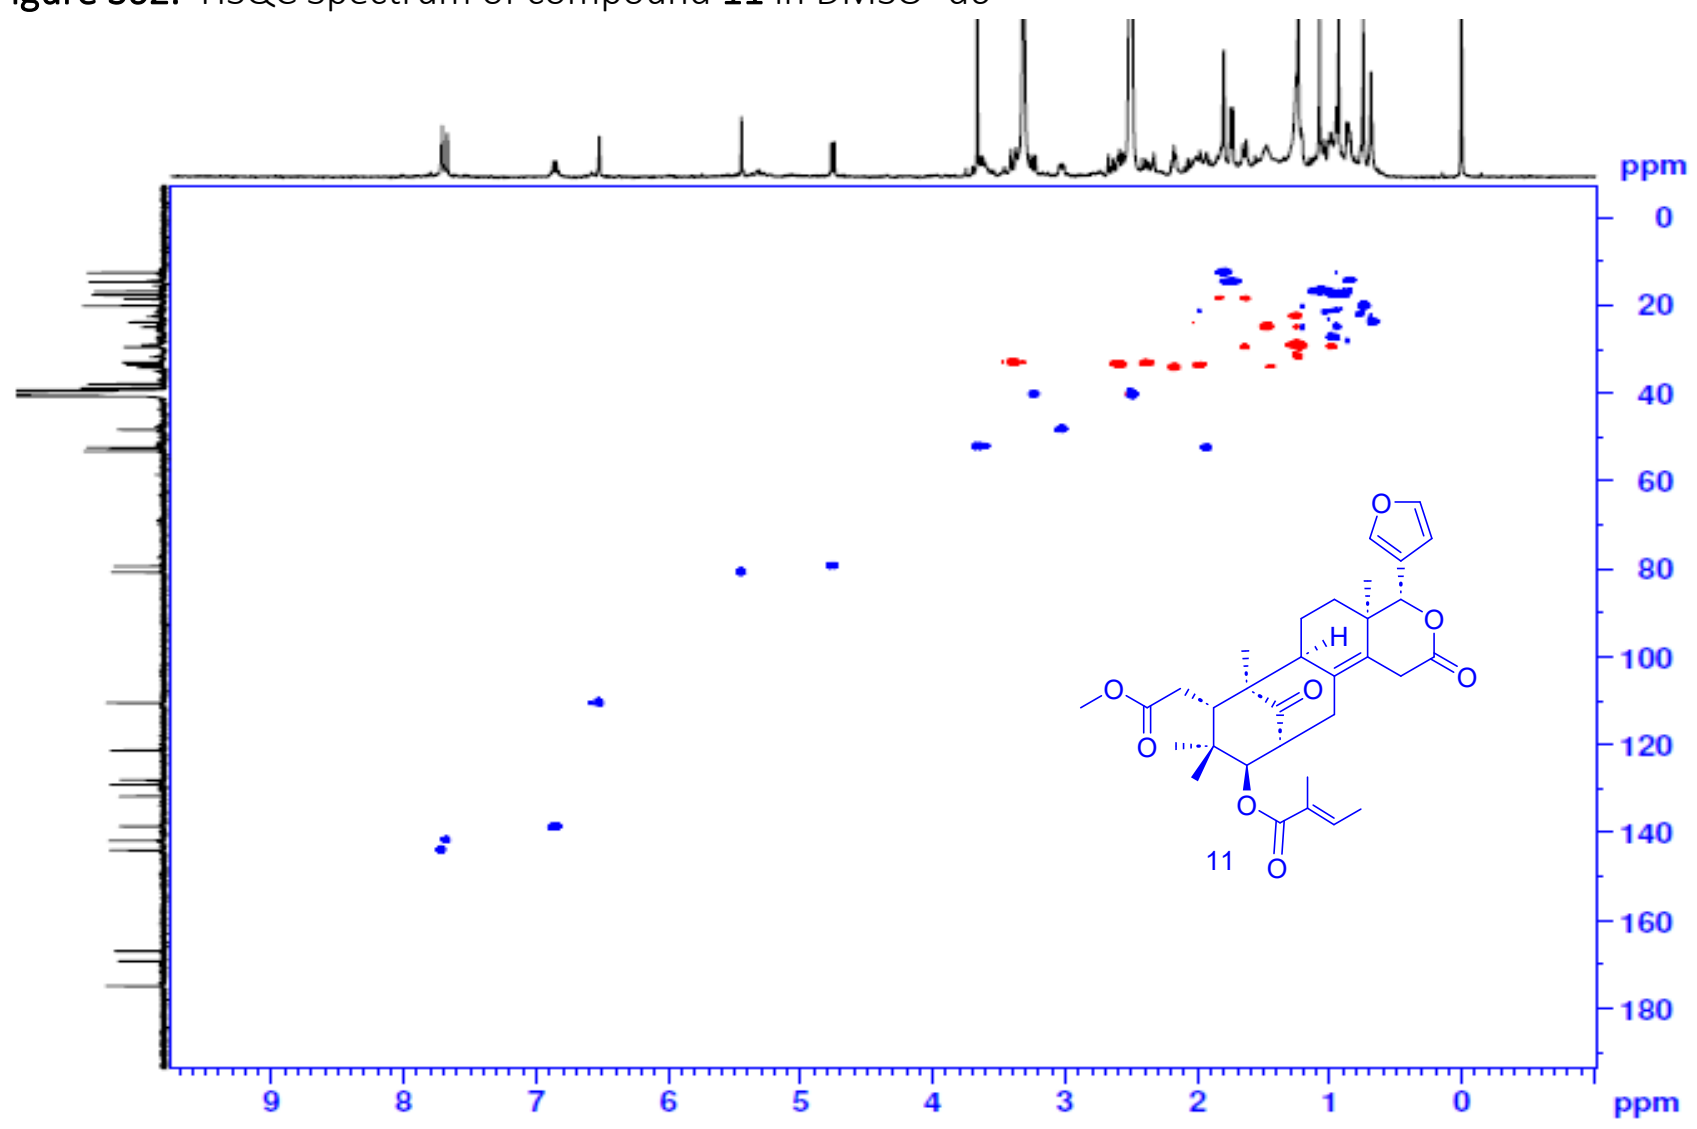

Figure S63. HMBC Spectrum of compound **11** in DMSO- d6

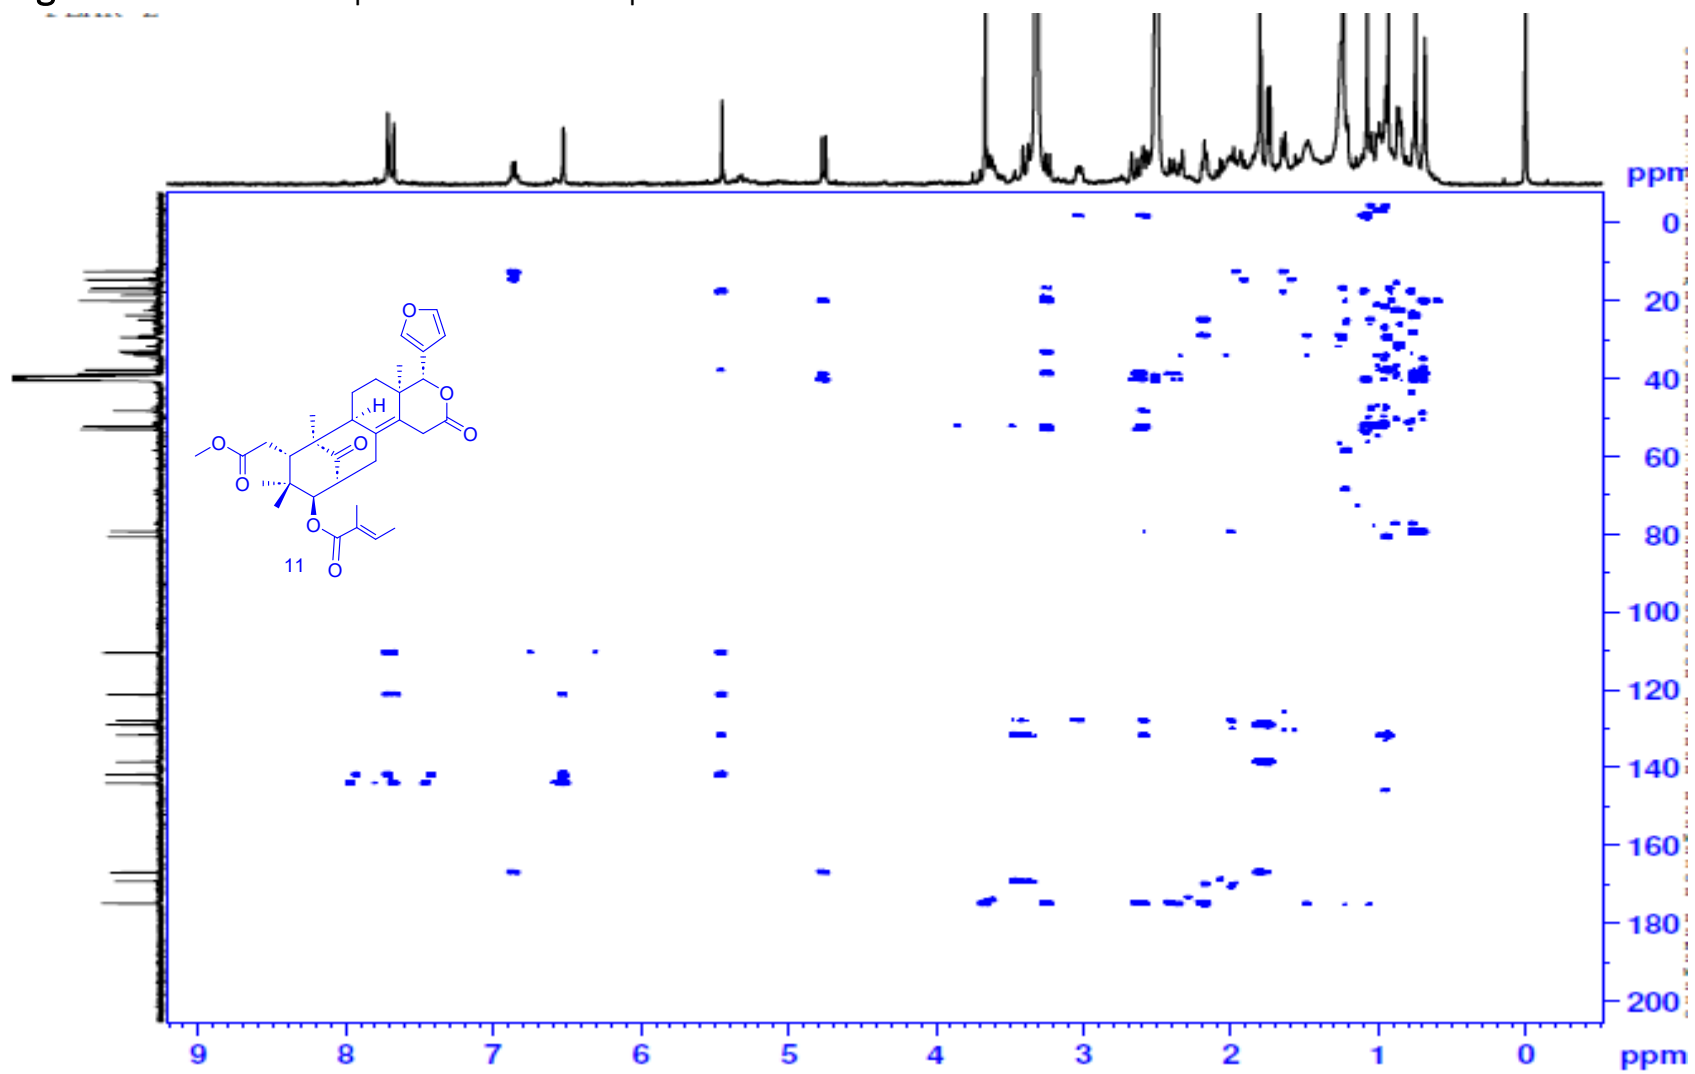

Figure S64. HRESI Spectrum of compound 11

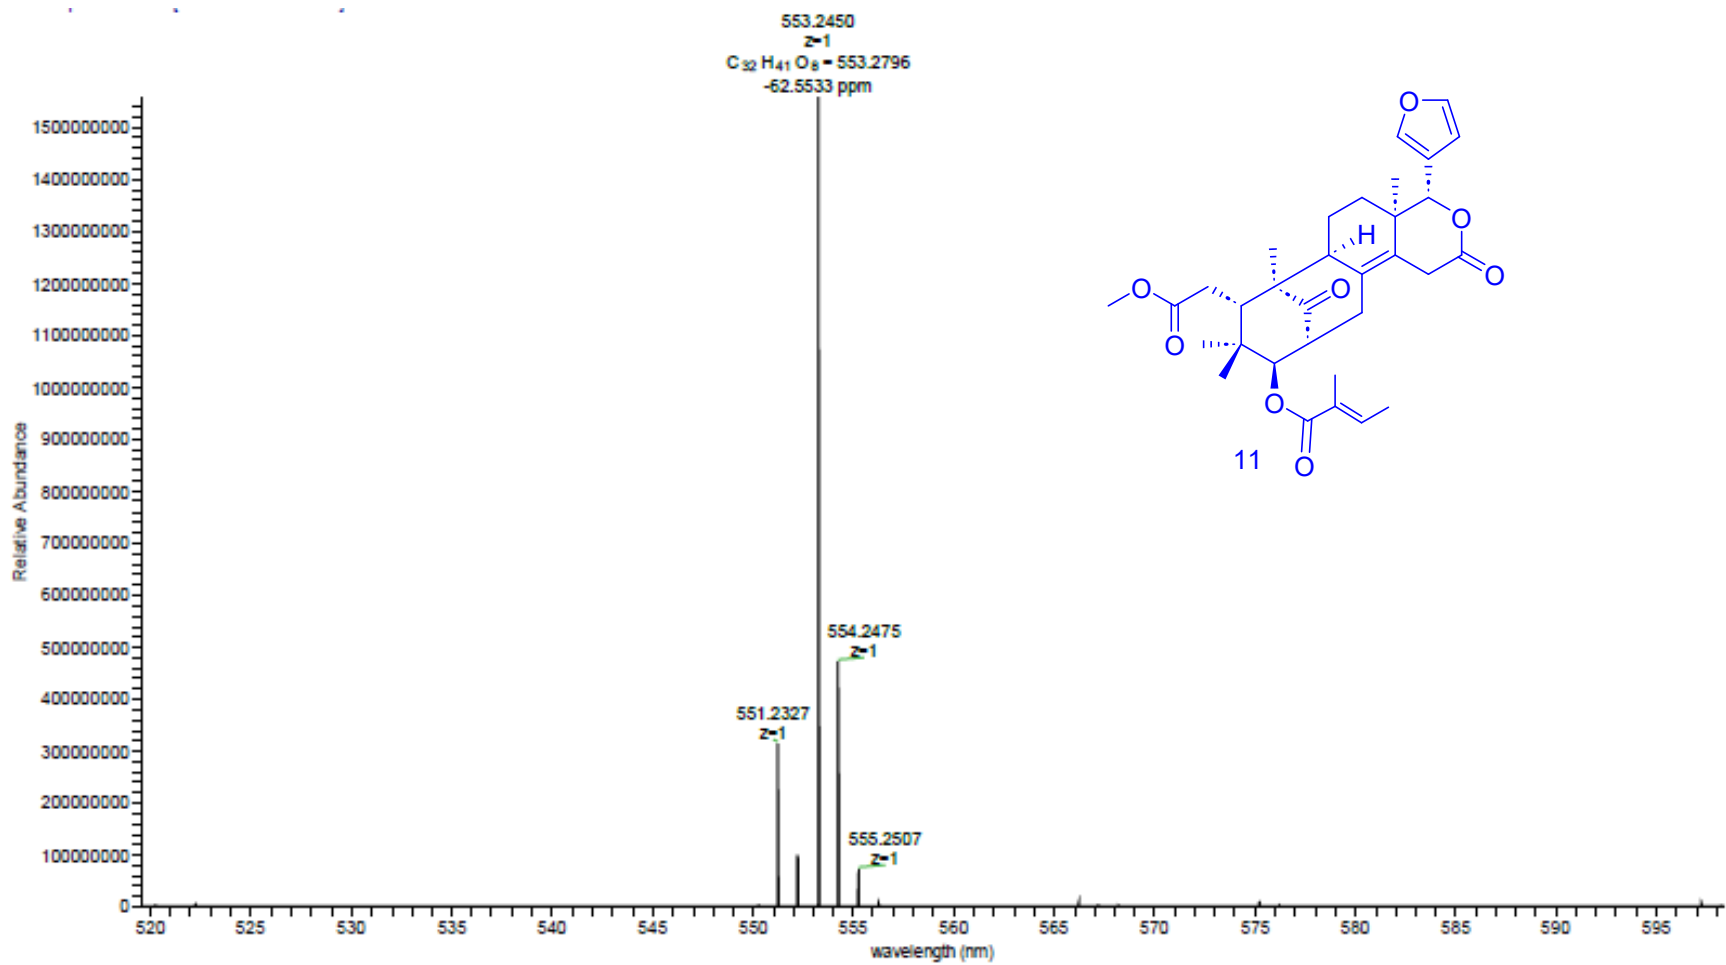

Figure S65.  $^1\text{H}$  NMR Spectrum of compound **12** at (400 MHz) in DMSO-  $d_6$

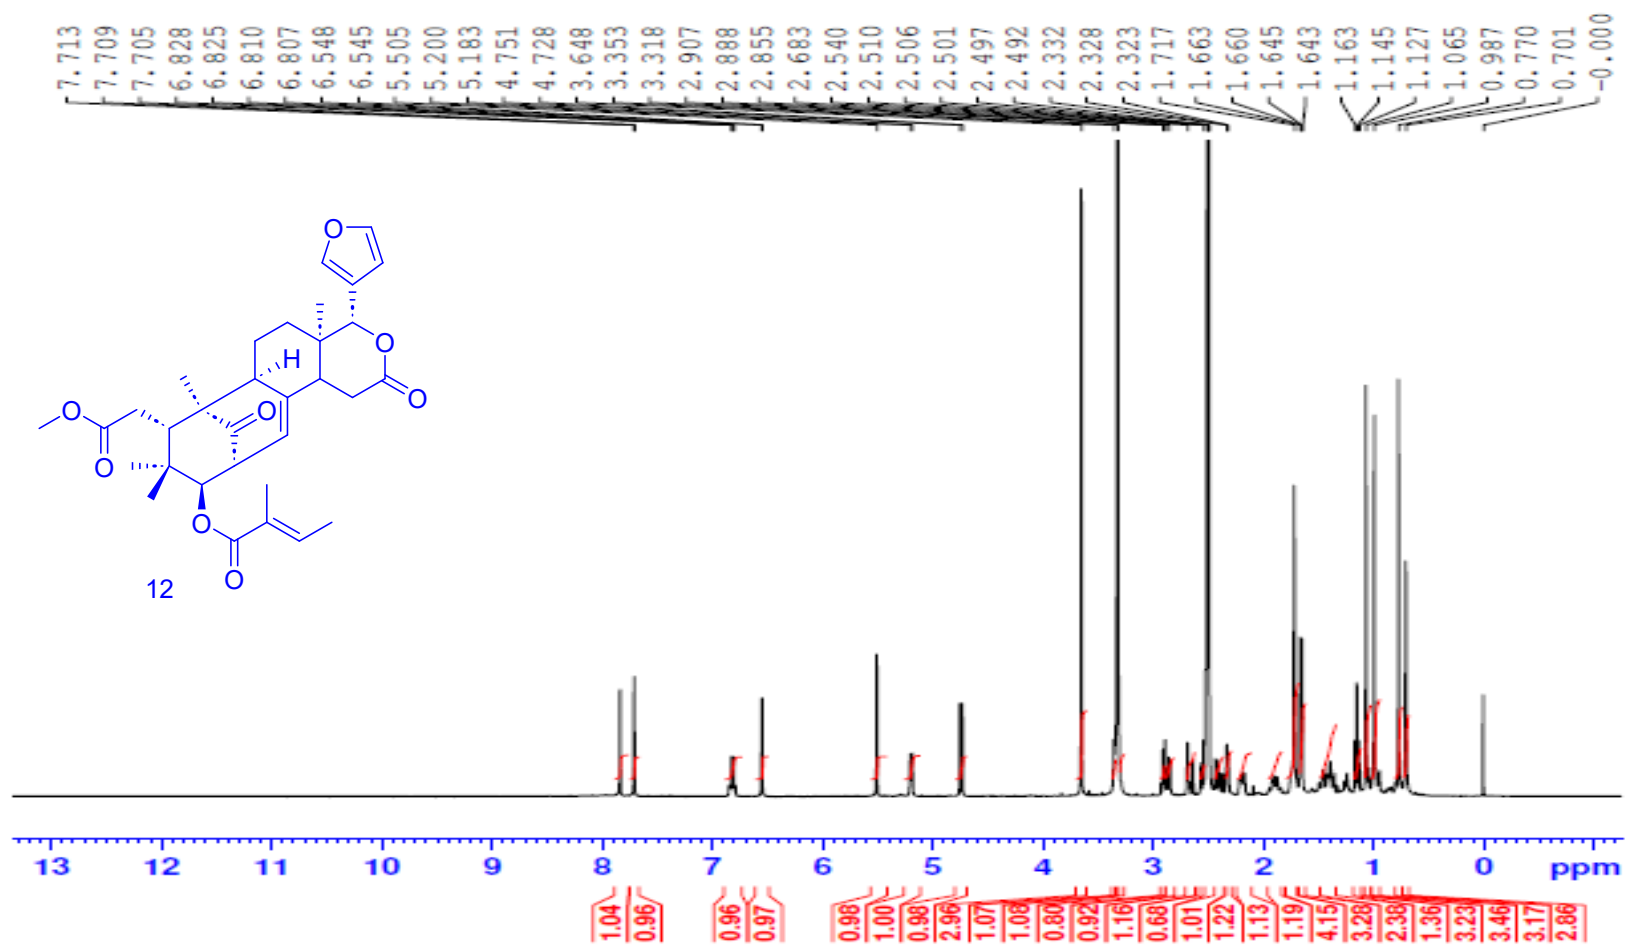



Figure S66. HSQC Spectrum of compound 12 in DMSO- d6

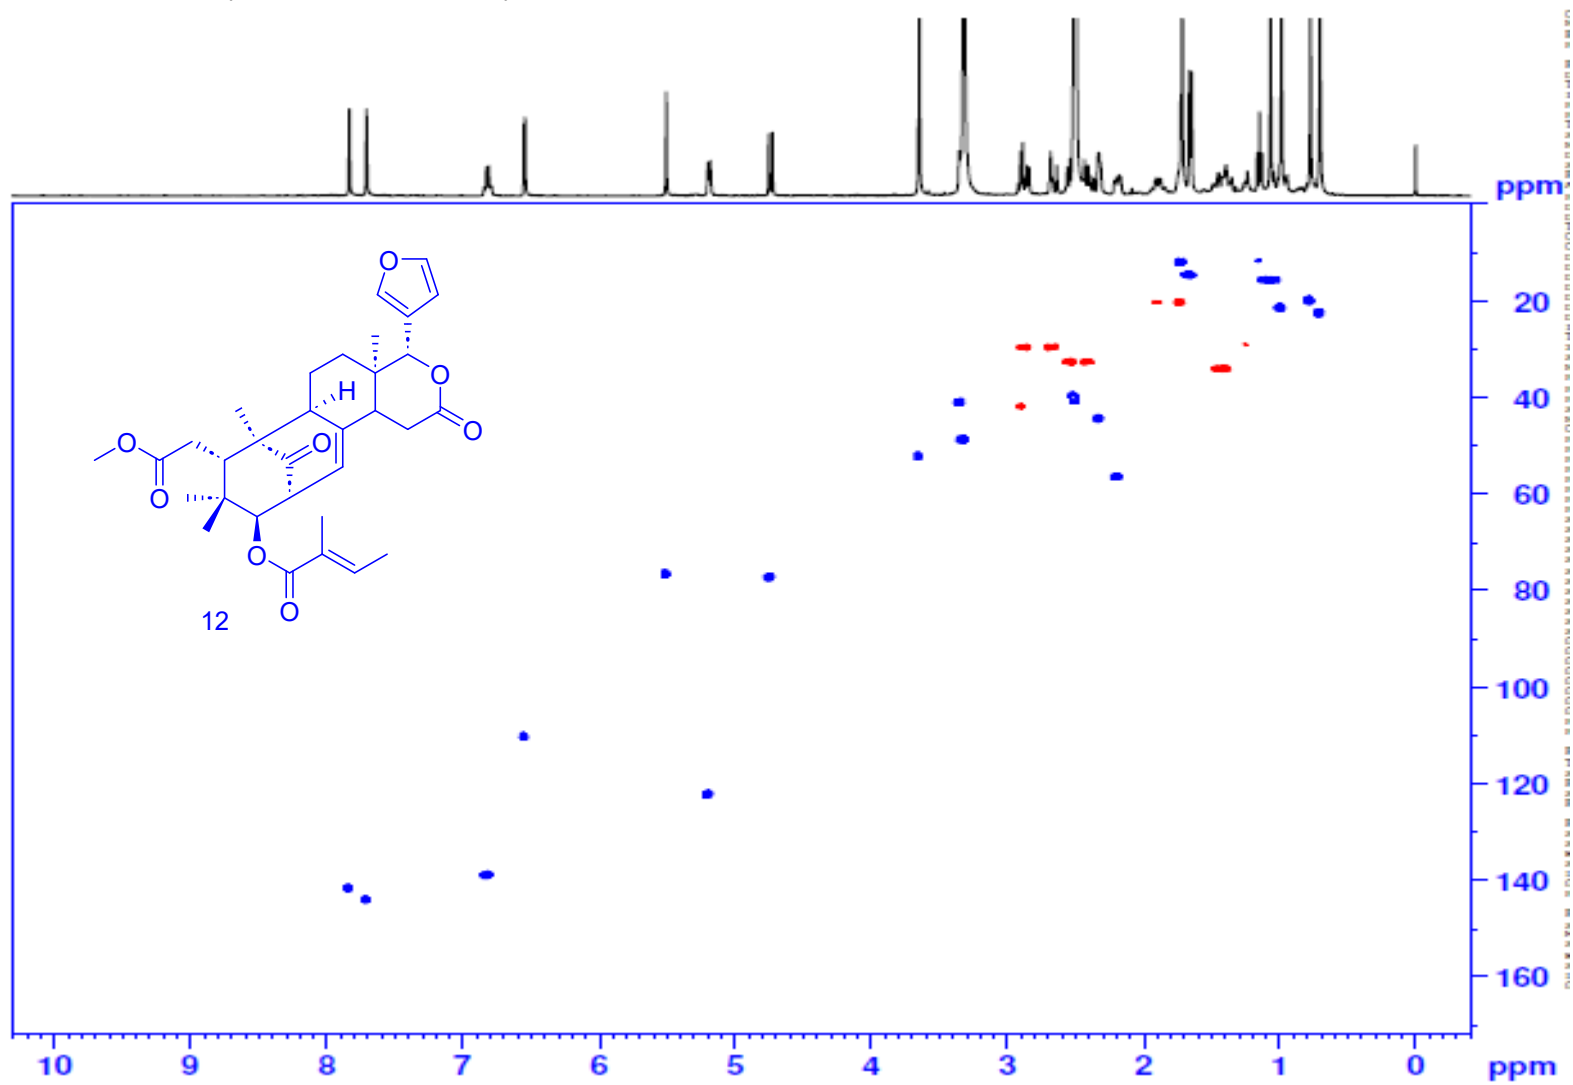

Figure S67. HSRMS Spectrum of compound 12

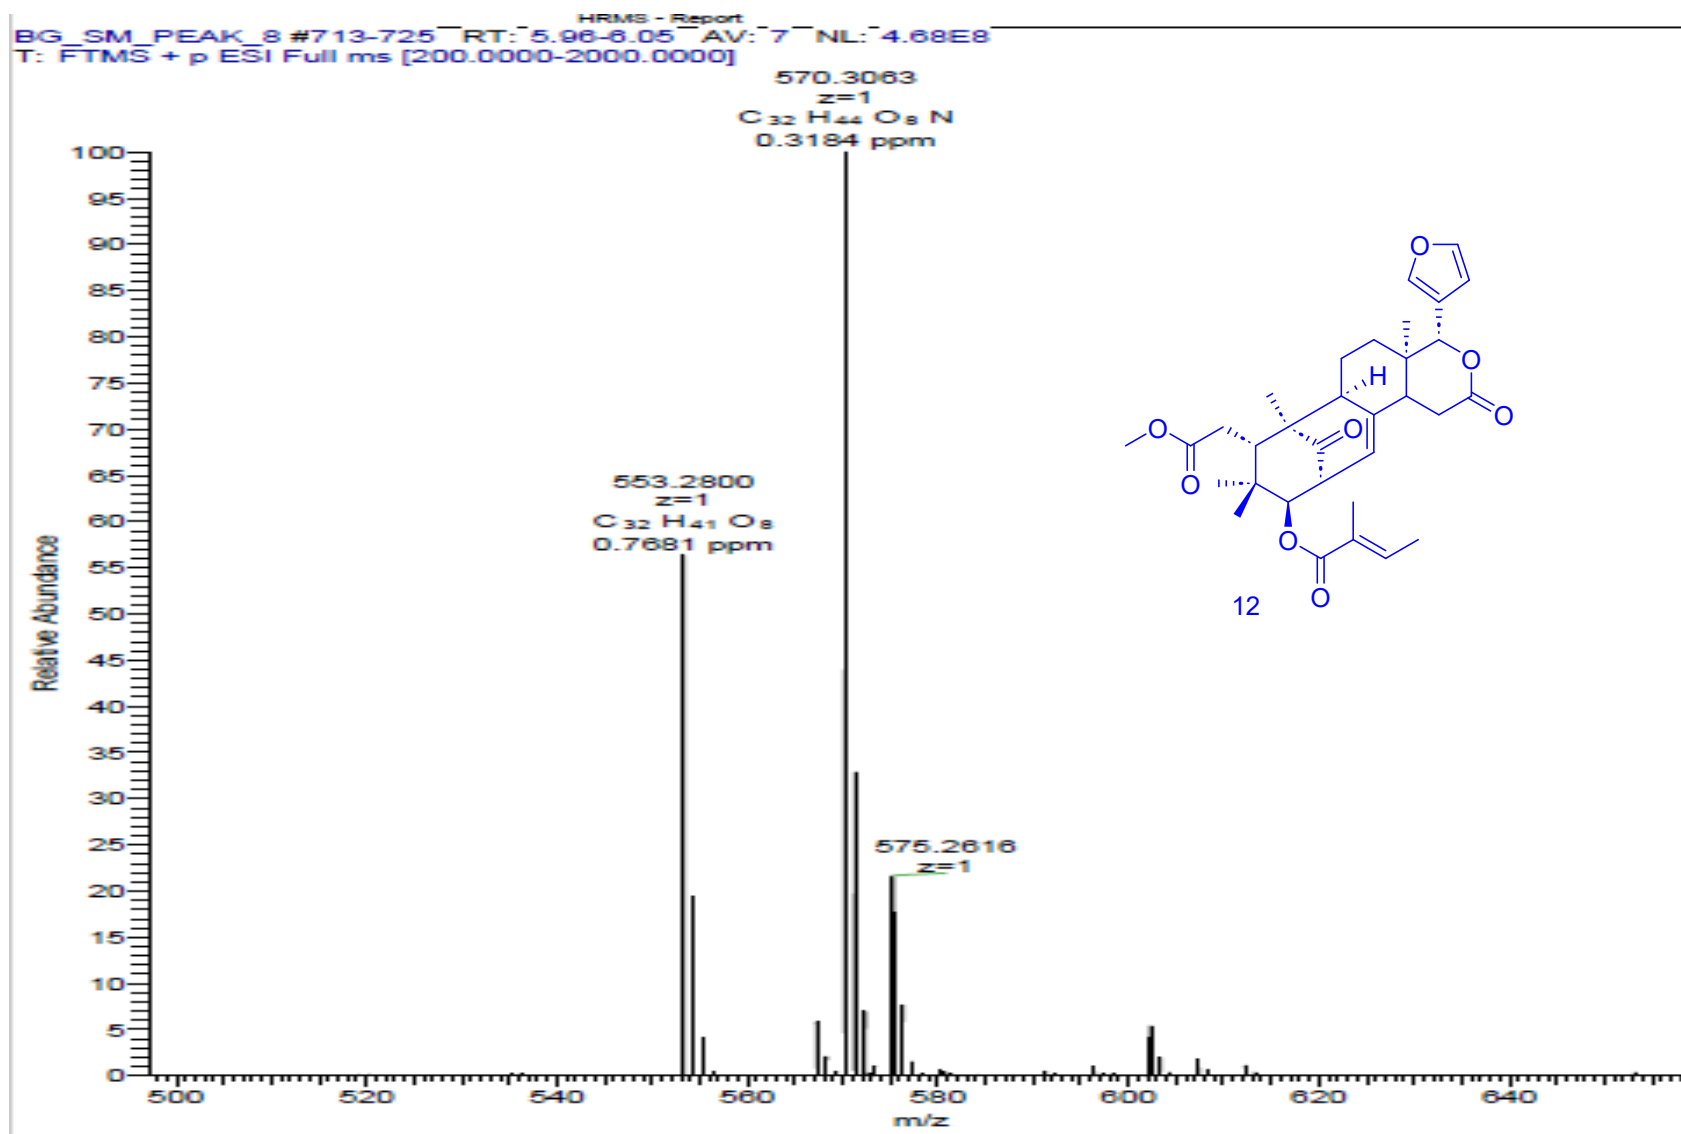

## **Pharmacological activities**

### **1. Anti-inflammatory Assay**

Protein denaturation has been well correlated with the occurrence of the inflammatory response and leads to various inflammatory diseases including arthritis. Tissue injury during life might be referable to denaturation of the protein constituents of cells or of intercellular substance. Hence, the ability of a substance to inhibit the denaturation of protein signifies apparent potential for anti-inflammatory activity.

#### **METHODOLOGY:**

##### **Effect of compounds 1, 2, and 3 on Protein Denaturation**

The reaction mixture, consisted of 0.2mL of 1% bovine albumin, 4.78ml of phosphate buffer saline (pH 6.4). 25 $\mu$ l (0.05 mg) and 50 $\mu$ l (0.1 mg) concentration of samples and the mixture was mixed, and was incubated in water bath (37 $^{\circ}$ C) for 15 min, and then reaction mixture was heated at 70 $^{\circ}$ C for 5 min. After cooling the turbidity was measured at 660nm. Phosphate buffer used as the negative control and Aspirin is used as a positive control (Osman et al., 2016; Kumari et al 2015).

To make 1 L of PBS, add 100 mL of 10X PBS to 900 mL of water. This PBS recipe contains 137 mM NaCl, 2.7 mM KCl, 10 mM Na<sub>2</sub>HPO<sub>4</sub>, and 1.8 mM KH<sub>2</sub>PO<sub>4</sub>.

The percentage inhibition of protein denaturation was calculated by using the formula.

$$\% \text{ inhibition of denaturation} = 100 \times [1 - A_2/A_1].$$

Where A<sub>1</sub>= absorption of control sample, A<sub>2</sub>= absorption of test sample.

#### **MEMBRANE LYSIS ASSAY**

##### **Preparation of Erythrocyte Suspension**

For preparation of Erythrocyte suspension, Human blood was collected from a healthy human subject. The blood was centrifuged at 3000 rpm for 5 minutes in heparinized centrifuge tubes, and washed with saline (0.9% NaCl). After centrifugation the blood volume was measured and reconstituted as a 10% (v/v) suspension with isotonic buffer solution. Composition of the buffer solution (g/L) used was NaH<sub>2</sub>PO<sub>4</sub>, Na<sub>2</sub>HPO<sub>4</sub> and NaCl (Ranasinghe et al., 2012).

##### **Haemolytic activity**

25 $\mu$ l (0.05 mg) and 50 $\mu$ l (0.1 mg) of sample and add 3ml of freshly prepared stock make it up to 5ml by using distilled water. Incubated at 37 $^{\circ}$ C for 60min. After the incubation, Tubes were centrifuged at 2000rpm for 2min. The absorbance of the supernatant

was measured at 540nm against blank (Karin et al., 2020). Aspirin used as a positive control. Activity was calculated using the formula (Sæbø et al., 2023; Rafique et al.,2023):

$$(OD_{\text{test}} - OD_{\text{negative control}} / OD_{\text{positive}} - OD_{\text{negative}}) \times 100$$

### **Heat-induced Hemolytic Activity**

0.05 mL of blood cell suspension and 25  $\mu$ l (0.05 mg) and 50  $\mu$ l (0.1 mg) of sample concentration. 2.95ml of phosphate buffer (7.4 pH) added to the tubes. Incubated at 54°C for 20 min in water bath. Aspirin used as a positive control. After the incubation, Vials were centrifuged at 5000rpm for 3min. Supernatant were collected and absorbance measured at 540nm (Ranasinghe et al., 2012; Moualek et al., 2016; Sakat et al., 2010) .

Formula for Heat induced haemolytic assay percentage calculation:

$$(1 - ODS) / ODC * 100$$

Whereas, ODC-optical density of control, and ODS-optical density of sample.

## **2. $\alpha$ - Amylase inhibition activity**

The  $\alpha$ -amylase inhibition assay was conducted using a modified technique based on the method developed by Kusano et al. The presence of undigested starch, resulting from the inhibition of enzymes, was identified at a wavelength of 630 nm. This was shown by the blue color of the starch-iodine combination. The substrate was produced by dissolving 200 mg of starch in 25 ml of 0.4 M NaOH solution through heating at 100°C for 5 minutes. Following the cooling process, the pH was modified to 7.0 and the total volume was increased to 100 ml by adding distilled water. Acarbose served as the positive control. Pre-incubation was performed by combining 40  $\mu$ l of substrate solution with 20  $\mu$ l of either acarbose or plant extract at different concentrations (10, 20, 40, 80, 160, and 640  $\mu$ g/ml). The mixture was then incubated at 37°C for 3 minutes. Next, 20  $\mu$ l of  $\alpha$ -amylase (at a concentration of 3 U/ml) was added to the mixture, which was then incubated at 37°C for 15 minutes. The  $\alpha$ -amylase was prepared in a 20 mM phosphate buffer with 6.7 mM NaCl, pH 6.9. The reaction was terminated by adding 80  $\mu$ l of hydrochloric acid (0.1 M). Subsequently, a volume of 100  $\mu$ l of iodine reagent with a concentration of 2.5 mM was introduced, and the absorbance was determined at a wavelength of 630 nm (Ritupama et al 2014; Balan et al.,2017; Ogunyemi et al., 2022).

$$\% \text{ inhibition} = (\text{Absorbance-control} - \text{Absorbance-test}) / \text{Absorbance-control} \times 100.$$

## **3. Antimicrobial activity of the samples using well diffusion method**

The anti-bacterial properties of tested against a variety of bacteria, including *Staphylococcus epidermis* (MTCC 2044), *Bacillus cereus* (MTCC2128) (gram-positive) and *Escherichia coli* (MTCC2412), *Klebsiella pneumonia* (MTCC 2451), (gram-negative) by using the agar-well diffusion method. Ciprofloxacin (1 mg/ml) is used as a positive reference. The bacterial strains culture was spread on sterilized Mueller Hinton Agar (MH) plates and incubated for 24 hrs at 37 °C overnight, following which the diameter of inhibition zone (DIZ) was measured in mm around each well to evaluate the anti-bacterial activity (Ishnava, et al.2014; Magaldiet al., 2004; Valgas et al., 2007)). Experiments were performed in triplicates. Similar procedure was followed for the antifungal activity using *Aspergillus niger* in Potato Dextrose Agar (PDA). Itraconazole (10mg/ml) was used as the positive control.

Figure S62. Antibacterial activity

**Antibacterial activity of selected test samples by disc diffusion method**

**Bacillus**

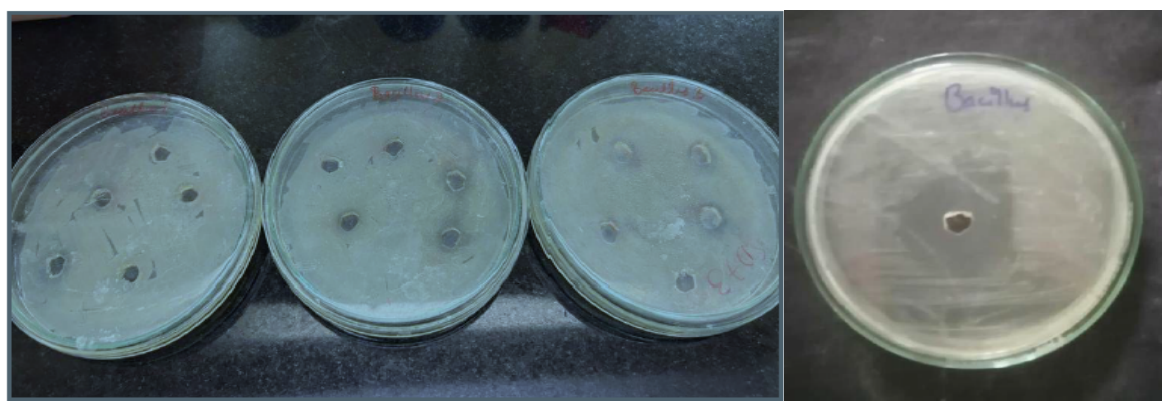

**Antibacterial activity of Compound 1 with Bacillus organism at different concentrations**

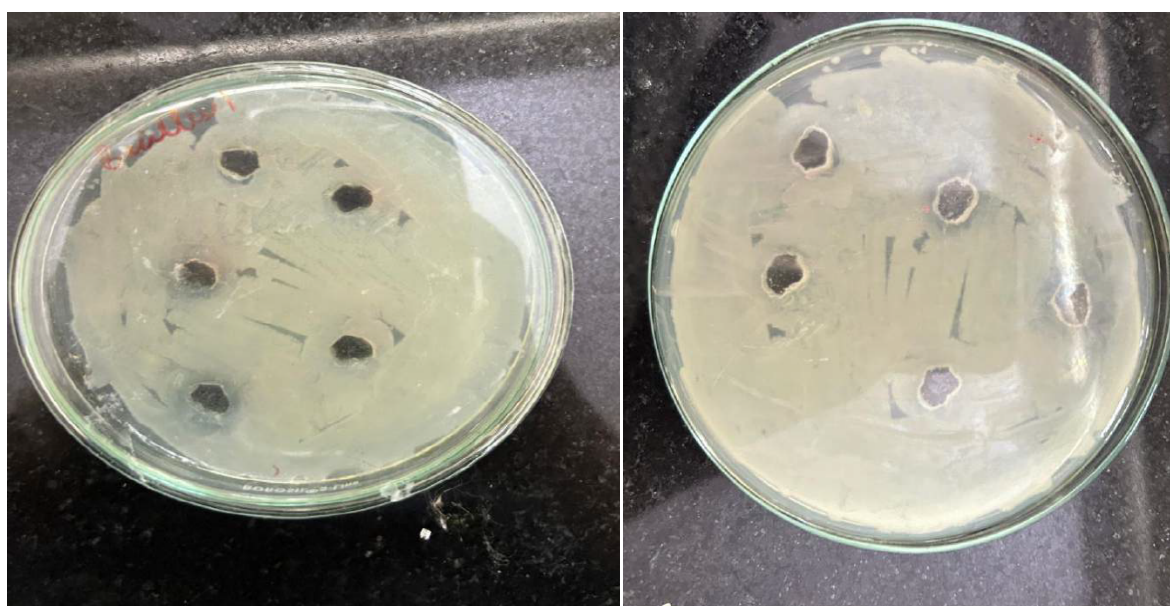



**Antibacterial activity of Compound 2 with Bacillus organism at different concentrations**

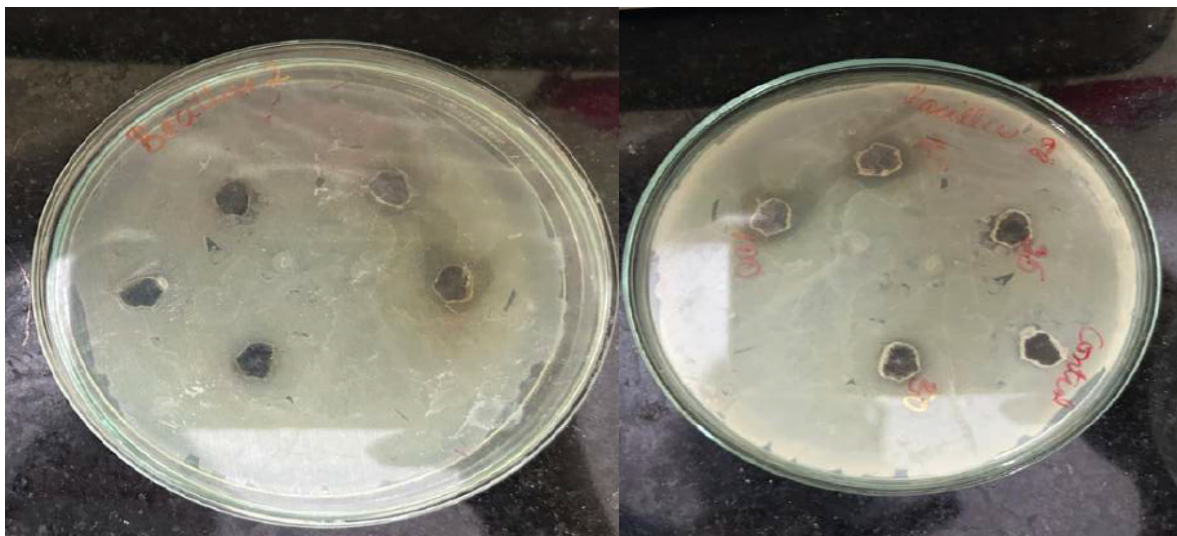

**against Bacillus organism at different concentrations**

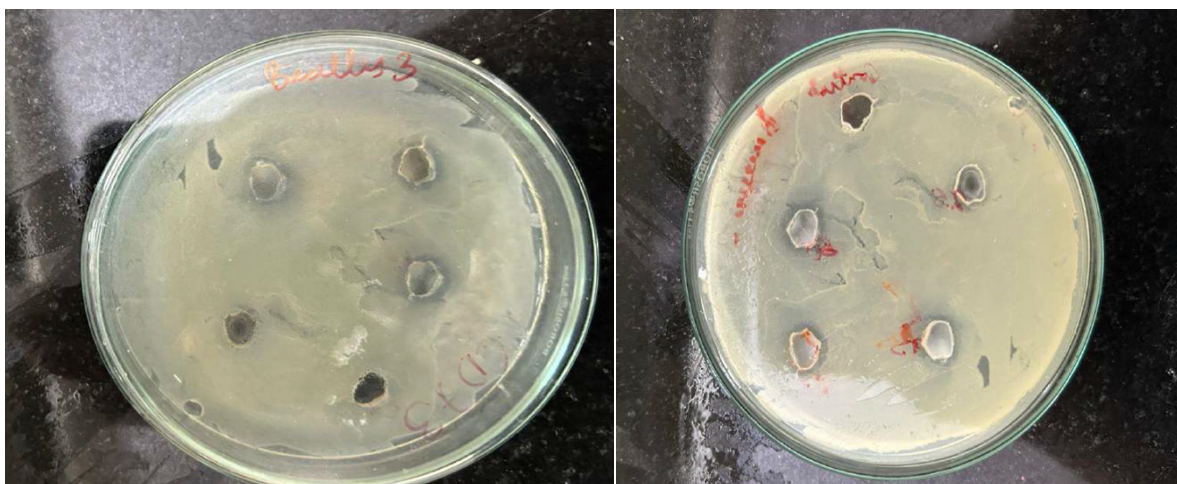

***E. coli***

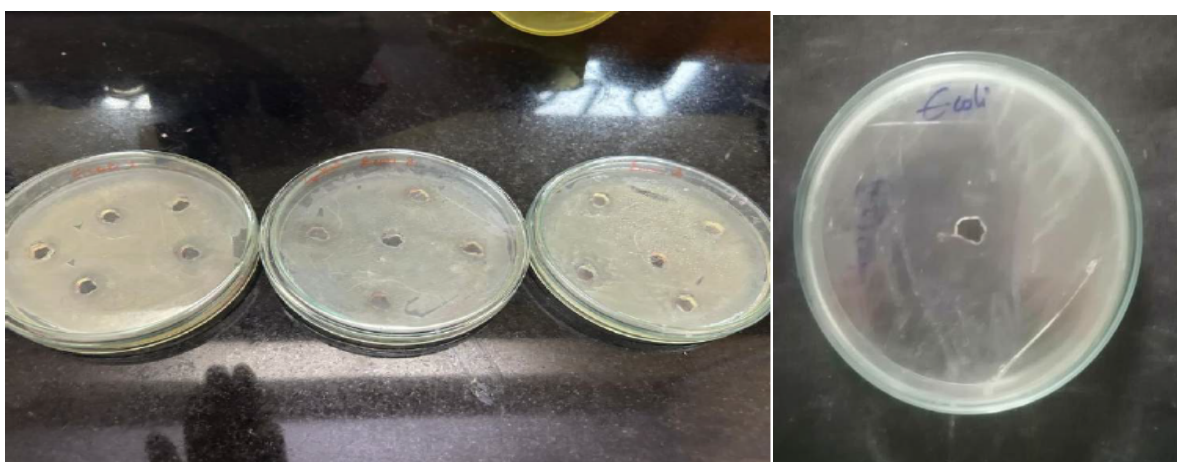

**Antibacterial activity of Compound 1 against *E. coli* organism at different concentrations**

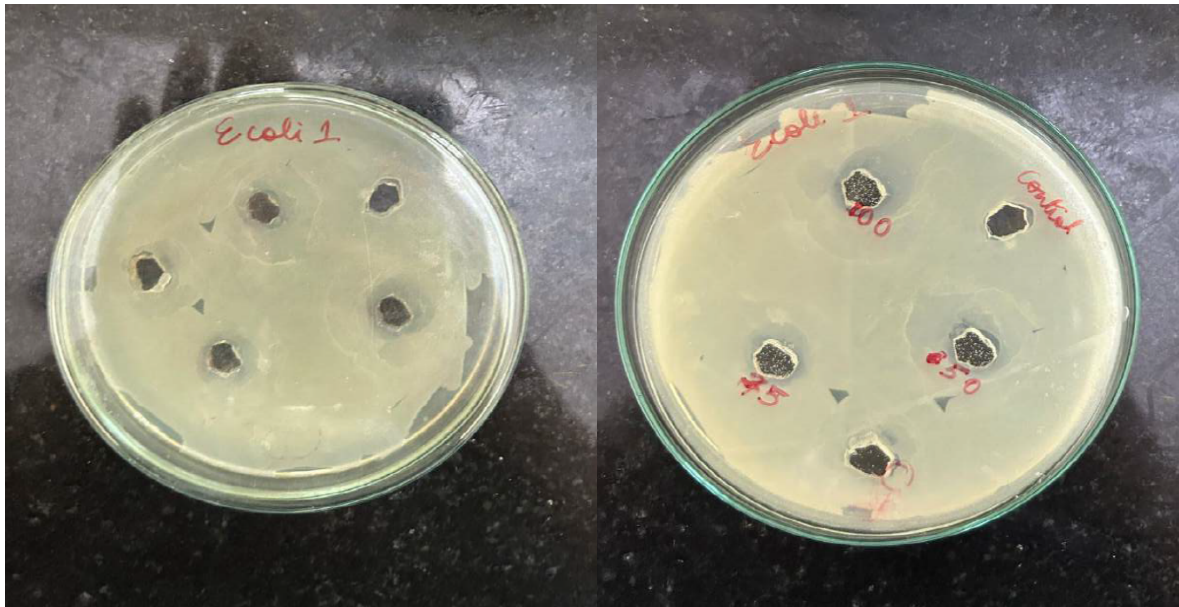

**Antibacterial activity of Compound 2 with E coli organism at different concentrations**

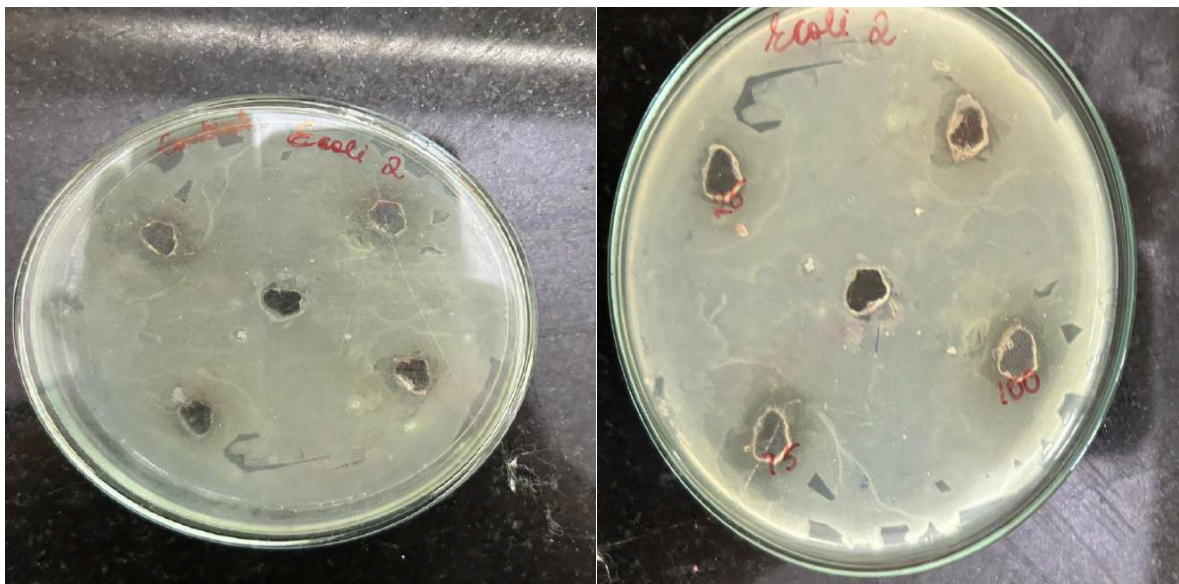

**Antibacterial activity of Compound 3 with E coli organism at different concentrations**



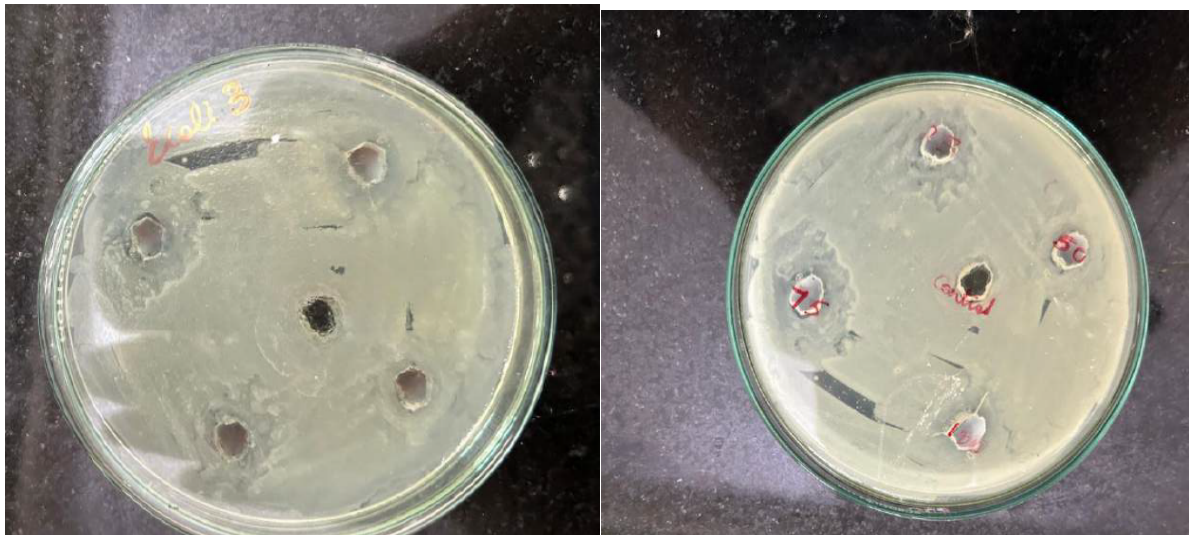

***Klebsiella pneumoniae***  
**Anti Bacterial Activvity**

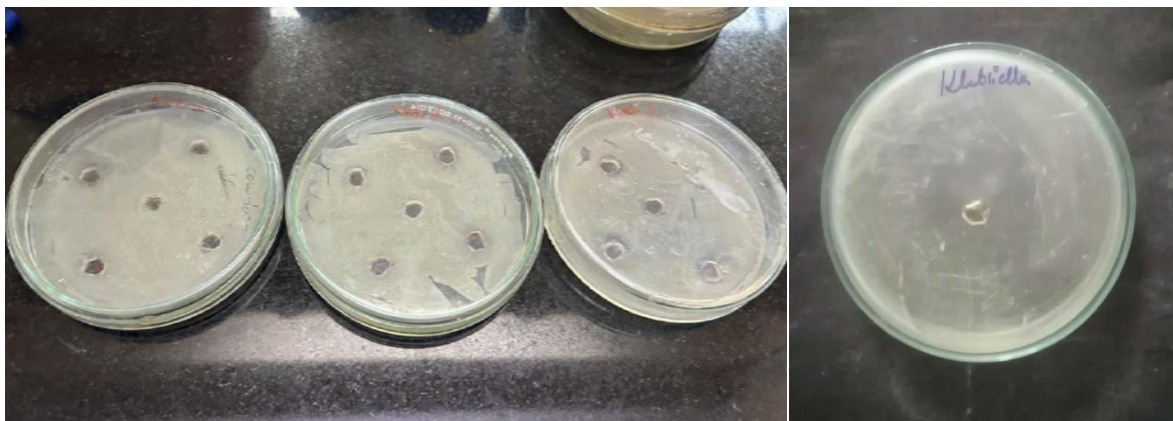

**Antibacterial activity of Compound 1 against *Klebsiella pneumoniae* at different concentrations**



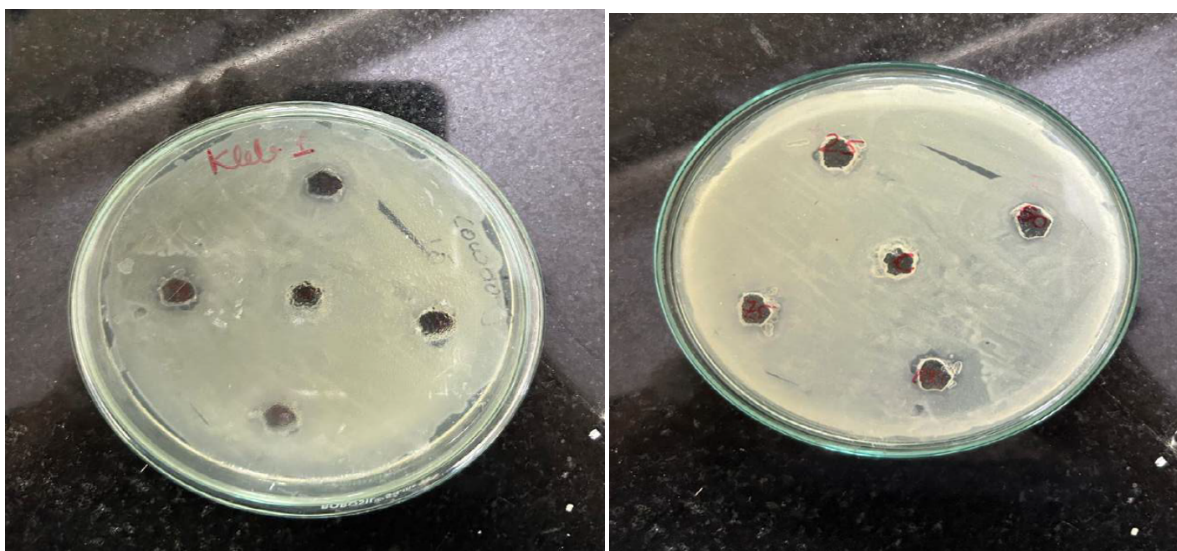

**Antibacterial activity of Compound 2 against Klebsiella organism at different concentrations**

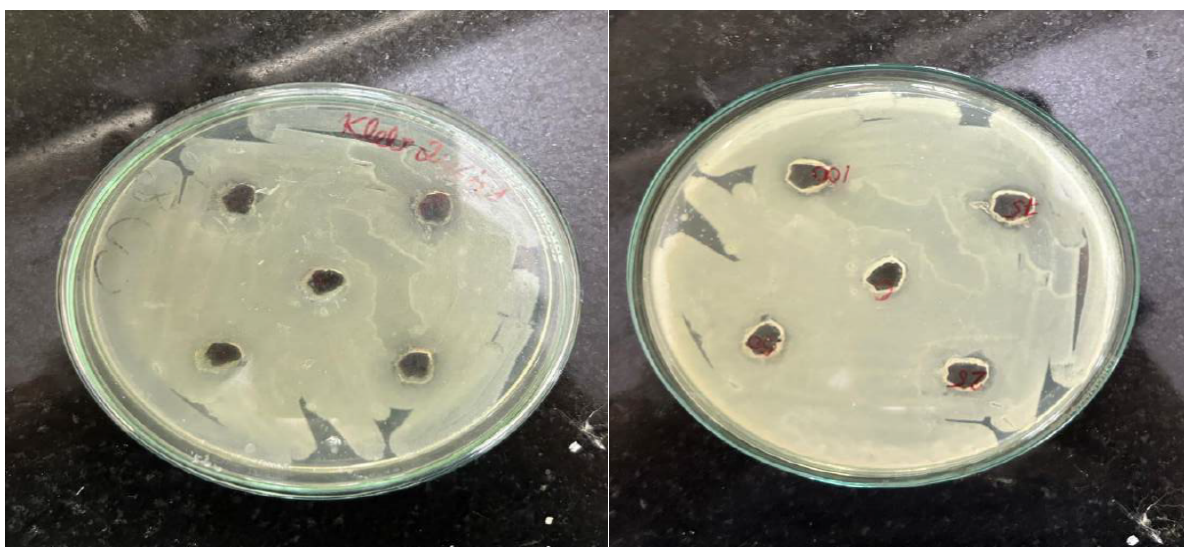

**Antibacterial activity of Compound 3 against with Klebsiella organism at different concentrations**

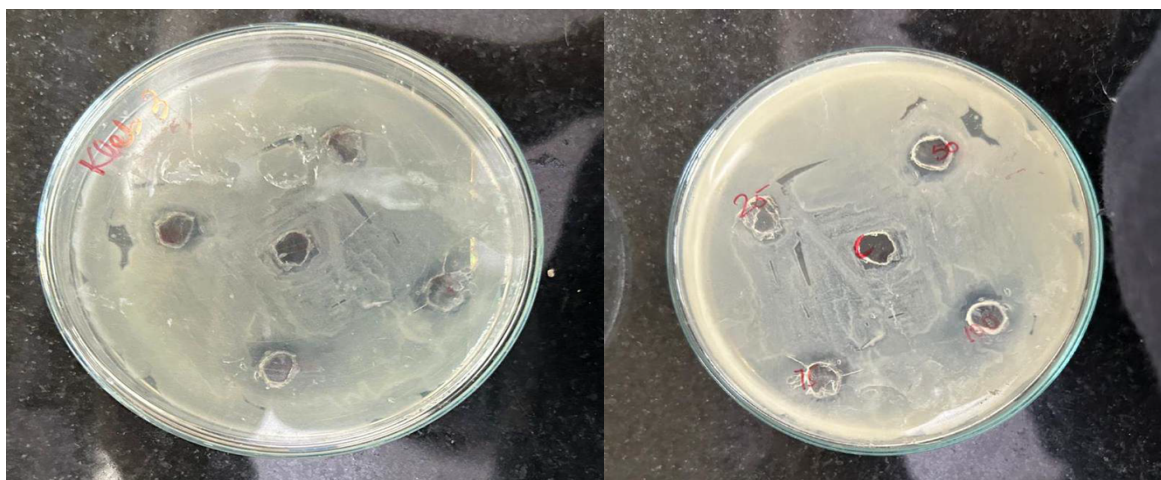



**Antibacterial activity of compound 1, 2, 3 against Staphylococcus aureus**

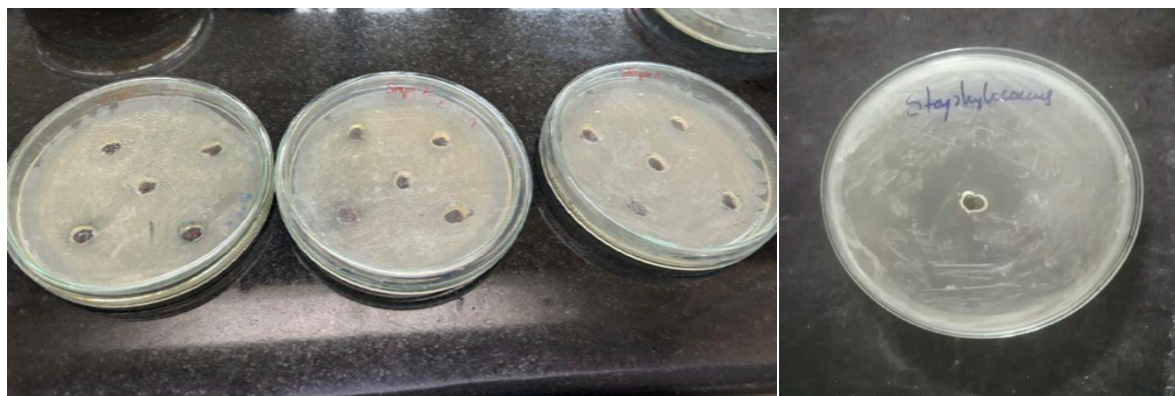

**Antibacterial activity of Compound 1 with Staphylococcus aureus at different concentrations**

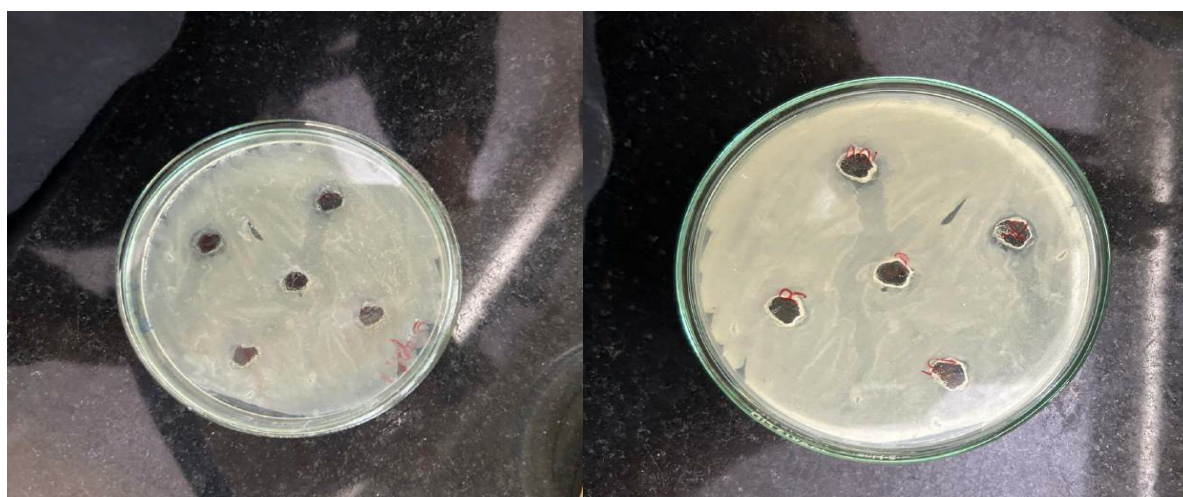

**Antibacterial activity of Compound 2 with Staphylococcus aureus at different concentrations**

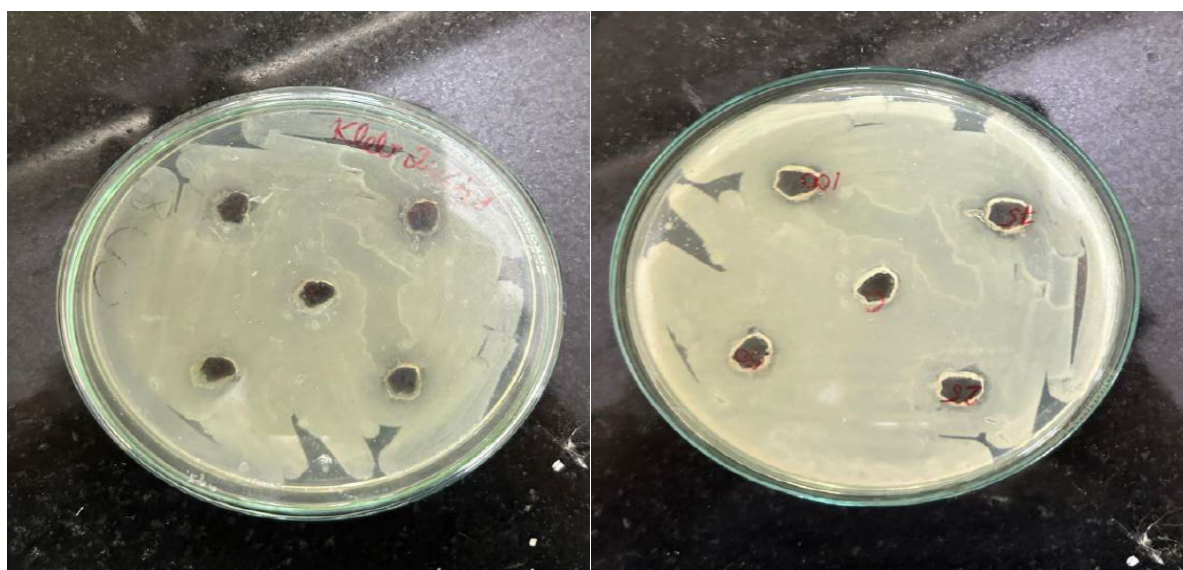

### Antibacterial activity of Compound 3 with *Staphylococcus aureus* at different concentrations

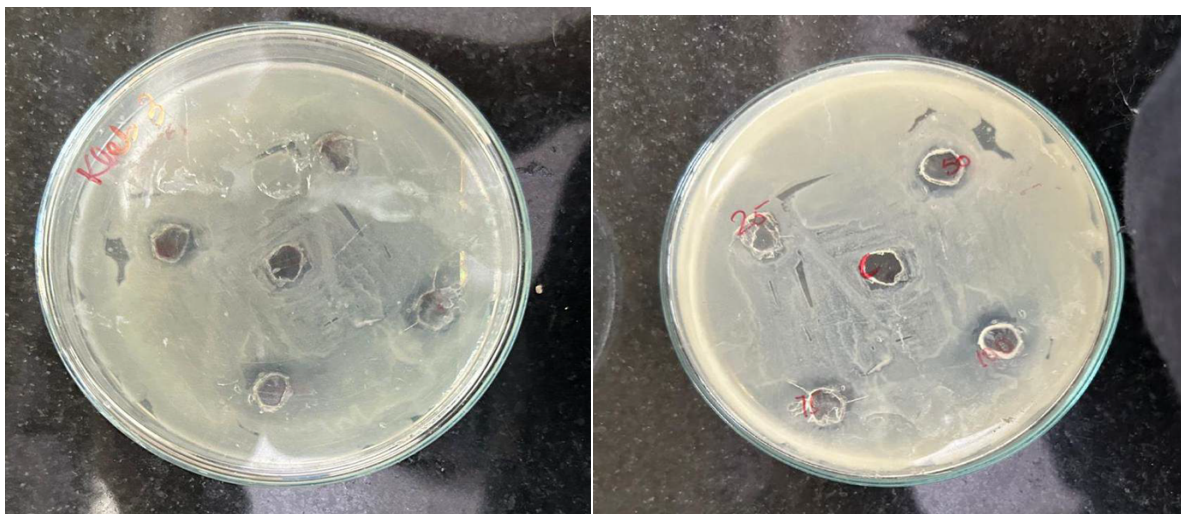

The antibacterial activity of the compounds 1, 2 and 3 increases with the increase in concentration of the compounds.

### Figure 68. Antifungal activity

None of the test compounds showed any inhibition at 25 $\mu$ l (0.05 mg), 50 $\mu$ l (0.1 mg), 75 $\mu$ l (0.15 mg) and 100  $\mu$ l (0.2 mg), against *Aspergillus niger*.

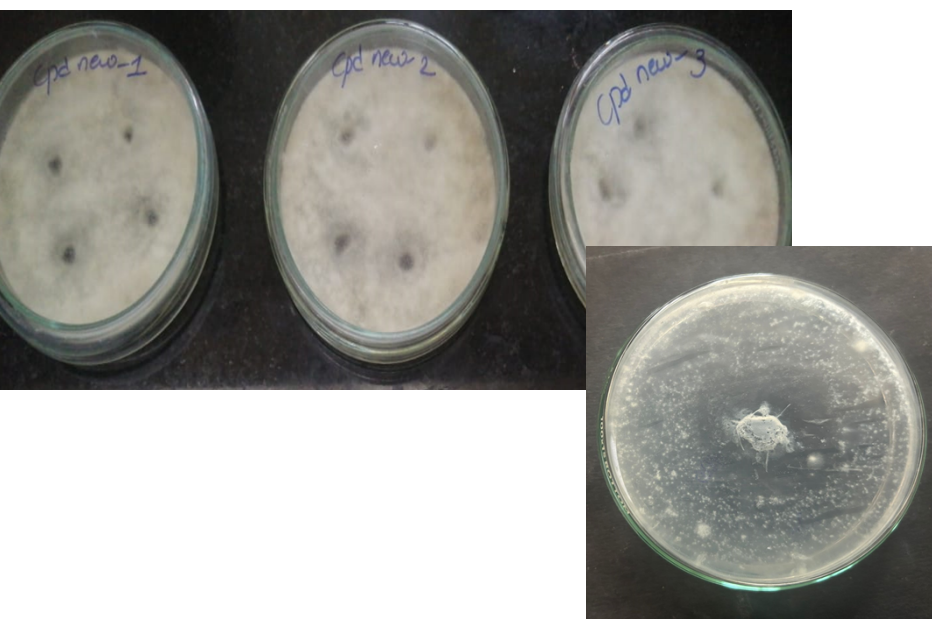

## Figure 2. Antifungal Activity of Compounds 1, 2, and 3 against *Aspergillus niger*

### Figure 69. Anti-mutagenic activity

#### Comet assay

The comet assay, or single-cell gel electrophoresis (SCGE), is a method used to quantify DNA damage in individual cells. This is a conventional method used to assess DNA damage and repair, monitor biological samples, and conduct tests to determine the potential for genetic damage.

#### PROTOCOL

The fresh blood was taken and the lymphocytes are extracted. The extracted lymphocytes are used as samples for testing. The collected blood was diluted with phosphate-buffered saline (PBS) and mixed with Ficoll-Hypaque. Afterwards, the blood mixed with Ficoll-Hypaque solution was subjected to centrifugation at a low speed for a duration of 30 minutes in order to separate the cells based on their density. The lymphocytes were retrieved from the intermediate layer following centrifugation (Chiu et al., 2019).

#### Preparation of slide

1. First Layer: Dust free, plain slides were covered a layer of 140 µl of 0.67% NMA and allowed to dry for 10mins in hot air oven. This layer serves as an anchor for additional layers to prevent slippage.
2. Second Layer: About 110 µl of NMA was layered as second layer and was immediately covered with cover slip and was kept at 4° c for 10mins.
3. Third Layer: 20 µl of blood sample (Approximately 1000-5000 cells) was mixed with 110 µl of warm LMA and mixture was layered as third additional layer and gelled at 4°c for 10mins.
4. Fourth Layer: A fourth additional layer of 110 µl of LMA was added on top and gelled again in the similar way as mentioned above, to sandwich the middle layer and to prevent loss of sample.
5. Lysing: After fourth layer of gel was set, the slides were treated overnight in freshly prepared chilled lysing buffer solution at 4° c with this treatment the cell membrane and nuclear membrane were lysed and the majorities of proteins were removed to expose the nucleosides.
6. Alkali treatment: The slides were then removed from the lysing solution, drained and placed in a horizontal electrophoresis tank side by side avoiding spaces and with agarose end facing the anode. The tank was filled carefully with fresh



electrophoresis buffer to a level approximately 0.25cms above the slides. The slides were left in the high PH (PH>13) buffer for 20mins to allow unwinding DNA and expression of alkali labile site before electrophoresis.

7. Electrophoresis: Electrophoresis was carried out at room temperature for 40mins at 3000mA, 20 V.

8. Neutralizing: After electrophoresis, the slides were flooded 3 times gently with chilled neutralizing solution (Tris PH 7.5) for 5mins so as to remove any traces of detergent and alkali which would otherwise interfere with staining the slides were washed thrice with distilled water, air dried.

9. Silver staining: The slides were silver stained by the method of Ahiya and Saran 1999. Briefly air-dried slides were immersed in the fixing solution for 10mins and washed gently with distilled water several times. The washed slides were allowed to air dry for about 1hour before staining. 68ml of ss (B) was mixed with 32ml of ss (A) and poured over the dried slides so as to cover the slide uniformly. This step was repeated with a fresh mix of ss until a grayish/brakish silver color developed on the slides. No need of stopping solution.

10. Analysis: The assay has the ability to detect differenced between cells in their susceptibility to DNA damage and their subsequent repair response which may vary with their proliferative or differentiative status. Hundred consecutive cells (50 cells from each end of slide) were manually selected and quantified with, which also determined the olive tail moment parameter.

[(Tail mean-head mean) (% tail DNA /100)] used to quantify DNA damage.

The head of comet in the nucleus of the cell and the tail of the comet is damaged DNA that has been liberated from the nucleus by electrophoresis. The tail mean is the tail DNA intensity subtracted from background intensity, the head mean is the head DNA intensity subtracted from background intensity and percentage of tail DNA is the fraction of DNA that has migrated from the head. The difference between the tail mean and head mean represents the difference in the distance between center of gravity of DNA distribution in comet head and center of gravity of DNA distribution in comet tail (S. Nandan et al., 2012).

## References

1) F. Robert, B. Mootoo, R. Ramsewak, A. Khan, A. Ramsabhag, W. Reynolds and M. Nair, *Pest Management Science* ., 2010, **66**, 1298-1303, DOI:10.1002/ps.2013.

- 2) B. S. Mootoo, A. Ali, R. Motilal, R. Pingal, A. Ramlal, A. Khan, W. F. Reynolds and S. McLean, *J. Nat. Prod.*, 1999, **62** (11), 1514–1517, DOI:10.1021/np990199x.
- 3) A. K. M. S. Rahman, A. K. A. Chowdhury, H. –A. Ali, S. Z. Raihan, M.S. Ali, L. Nahar and S. D. Sarker, *Journal of Natural Medicines.*, 2009, **63**, 41-45, DOI:10.1007/s11418-008-0287-3.
- 4) L. –C. Chen, H. –R. Liao, P.-Y. Chen, W. -L. Kuo, T. –H. Chang, P. –J. Sung, Z. –H. Wen and J. –J. Chen, *Molecules.*, 2015, **20**, 18551-18564, DOI: 10.3390/molecules201018551.
- 5) Chen, Jih-Jung; Huang, Sheng-Shiou; Liao, Chang-Hui; Wei, Dau-Chang; Sung, Ping-Jyun; Wang, Tai-Chi; Cheng, Ming-Jen. *Food Chemistry.*, 2010, **120**, 379-384, DOI: 10.1016/j.foodchem.2009.09.093.
- 6) A. H. Nour, Mohammed, B. Sulieman, M. Yousf, Abdurahman, Adam, M. Mazza, *Australian Journal of Basic and Applied Sciences.*, 2016, **10**(17Spec.Iss.), 55-62.
- 7) Y.-B. Cheng, Y.-T. Chien, J.-C. Lee, C.-K. Tseng, H.-C. Wang, I.-W. Lo, Y. –H. Wu, S.-Y. Wang, Y.-C. Wu and F.-R. Chang, *J.Nat.Prod.*, 2014, **77**, 2367-2374, DOI: 10.1021/np5002829.
- 8) Y.-Q. Ma, K. Jiang, Y. Deng, L. Guo, Y.-Q. Wan, C.-H. Tan, *Journal of Asian Natural Products Research.*, 2018, **20**, 299-305, DOI:10.1080/10286020.2017.1335715.
- 9) B. H. Goh, H. A. Kadir, S. N. A. Malek and S. W. Ng, *Acta Crystallographica.*, 2010, **66**(6), o1396, DOI:10.1107/S1600536810017733.
- 10) C. K. Mahendra, H. L. Ser, S. Z. Abidin, S. U. Khan, P. Pusparajah, T. T. Htar, L. H. Chuah, S. Y. Tang, Siah Ying; Ming, Long Chiau; Goh, Khang Wen, *Biomedicine & Pharmacotherapy.*, 2023, **162**, 114659, DOI: 10.1016/j.biopha.2023.114659.

11) J. Zhang, S.-X. Yang, X.-B. Yang, M.-Y. Li, G. Feng, J.-Y. Pan and T. Satyanandamurty, *Chemical & Pharmaceutical Bulletin.*, 2010, **58**(4), 552-555, DOI:10.1248/cpb.58.552.

12) G. Robert, Mootoo, S. Baldwin, Ramsewak, S. Russel. Khan and Ayub, *Pharmaceutical Biology.*, 2012, **50**(2), 264-267, DOI: 10.3109/13880209.2011.581670.
